# Supplementary material
Source: PubMed Central journal article supplement (PMC3520487)

Supporting Information

© Wiley-VCH 2011

69451 Weinheim, Germany

**Short, Enantioselective Total Syntheses of (–)-8-Demethoxyrunanine  
and (–)-Cepharatines A, C, and D\*\***

*Kangway V. Chuang, Raul Navarro, and Sarah E. Reisman\**

anie\_201104487\_sm\_miscellaneous\_information.pdf

**I. Materials and Methods.** Unless otherwise stated, reactions were performed under a nitrogen atmosphere using freshly dried solvents. Tetrahydrofuran (THF), methylene chloride ( $\text{CH}_2\text{Cl}_2$ ), diethyl ether ( $\text{Et}_2\text{O}$ ), acetonitrile (MeCN), toluene and benzene were dried by passing through activated alumina columns. Dimethylformamide (DMF) was dried over activated molecular sieves, MeOH was distilled over magnesium oxide, dichloroethane (DCE) and triethylamine ( $\text{Et}_3\text{N}$ ) were distilled over calcium hydride. All other commercially obtained reagents were used as received unless specifically indicated. All reactions were monitored by thin-layer chromatography using EMD/Merck silica gel 60 F254 pre-coated plates (0.25 mm). Flash column chromatography was performed either as described by Still et al. (Still, W. C., Kahn, M.; Mitra, A. *J. Org. Chem.* **1978**, *43*, 2923-2925.) using silica gel (particle size 0.032-0.063) purchased from Silicycle or using pre-packaged RediSep<sup>®</sup>Rf columns on a CombiFlash Rf system (Teledyne ISCO Inc.). Microwave experiments were performed using a Biotage Initiator<sup>®</sup> microwave reactor.  $^1\text{H}$  and  $^{13}\text{C}$  NMR spectra were recorded on a Varian Inova 500 (at 500 MHz and 126 MHz respectively), and are reported relative to internal chloroform ( $^1\text{H}$ ,  $\delta = 7.26$ ,  $^{13}\text{C}$ ,  $\delta = 77.0$ ). Data for  $^1\text{H}$  NMR spectra are reported as follows: chemical shift ( $\delta$  ppm) (multiplicity, coupling constant (Hz), integration). Multiplicity and qualifier abbreviations are as follows: s = singlet, d = doublet, t = triplet, q = quartet, m = multiplet, br = broad, app = apparent. IR spectra were recorded on a Perkin Elmer Paragon 1000 spectrometer and are reported in frequency of absorption ( $\text{cm}^{-1}$ ). Analytical SFC was performed with a Mettler SFC supercritical  $\text{CO}_2$  analytical chromatography system with Chiralcel AD-H, OJ-H columns (4.6 mm x 25 cm). Melting points were determined using a Büchi B-545 capillary melting point apparatus and the values reported are uncorrected. HRMS were acquired using either an Agilent 6200 Series TOF with an Agilent G1978A Multimode source in electrospray ionization (ESI), atmospheric pressure chemical ionization (APCI) or mixed (MM) ionization mode, or obtained from the Caltech Mass Spectral Facility.

## II. Experimental Procedures

### Preparation of Dienone 21

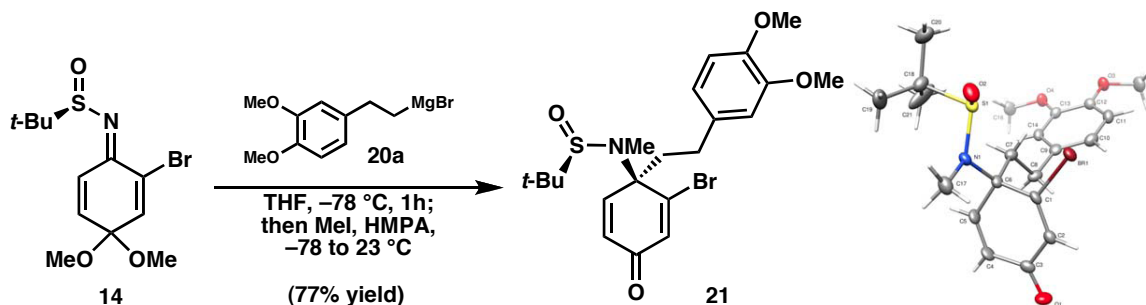

To a solution of bromo-quinonesulfinylimine **14**<sup>1</sup> (2.96 g, 8.80 mmol, 1.0 equiv) in THF (17 mL) at  $-78\text{ }^{\circ}\text{C}$  (dry ice/acetone) was added a solution of 3,4-dimethoxyphenethylmagnesium bromide<sup>2</sup> (0.67M solution in THF, 14.3 mL, 9.6 mmol) dropwise by syringe. The solution was then stirred at  $-78\text{ }^{\circ}\text{C}$  for one hour, then methyl iodide (1.6 mL, 26.1 mmol, 3.0 equiv) and hexamethylphosphoramide (4.5 mL, 26.1 mmol, 3.0 equiv) were sequentially added dropwise by syringe, and the solution stirred at  $-78\text{ }^{\circ}\text{C}$  for ten minutes. The solution was then warmed to  $23\text{ }^{\circ}\text{C}$  and stirred for 2 hours, then quenched by the addition of aqueous acetic acid (10% v/v, 31 mL). After 3.5 hours, the mixture was diluted with  $\text{H}_2\text{O}$  (100 mL) and extracted with EtOAc (3 x 150 mL) and washed with  $\text{H}_2\text{O}$  (3 x 100 mL). The organic layers were then combined, washed with saturated aqueous  $\text{NaHCO}_3$  (150 mL), then brine (150 mL), dried over  $\text{Na}_2\text{SO}_4$ , filtered, and concentrated in vacuo to afford a clear brown oil. The diastereoselectivity was determined by LC/MS: 96:4 dr (5 $\rightarrow$ 95% MeCN/ $\text{H}_2\text{O}$ ,  $t = 0\text{--}10$  min, 1 mL/min. Major diastereomer:  $t_{\text{R}} = 4.2$  min, minor diastereomer:  $t_{\text{R}} = 4.8$  min). Flash chromatography (30% to 80% EtOAc in Hexanes) afforded dienone **21** as a white crystalline solid (3.18 g, 6.76 mmol, 77% yield). A small portion of the solid was recrystallized by vapor fusion of pentane into a solution of **21** in toluene to afford large crystals suitable for single crystal X-ray diffraction.

**Major Diastereomer (*R*,*R*)-21** – Melting Point:  $136\text{--}138\text{ }^{\circ}\text{C}$ ;  $^1\text{H}$  NMR (500 MHz,  $\text{CDCl}_3$ )  $\delta$  6.93 (d,  $J = 1.7$  Hz, 1H), 6.82 (d,  $J = 10.0$  Hz, 1H), 6.78 (d,  $J = 8.0$  Hz, 1H), 6.66 (dd,  $J = 6.1$  Hz, 2.0 Hz, 2H), 6.62 (d,  $J = 2.0$  Hz, 1H), 6.44 (dd,  $J = 9.8$  Hz, 1.7 Hz, 1H), 3.85 (s, 3H), 3.84 (s, 3H), 2.81 (td, 12.3 Hz, 4.9 Hz, 1H), 2.47 (s, 3H), 2.39 – 2.24 (m, 2H), 1.84 (td,  $J = 12.5$  Hz, 5.2 Hz, 1H), 1.22 (s, 9H);  $^{13}\text{C}$  NMR (126 MHz,  $\text{CDCl}_3$ )  $\delta$  183.0, 150.7, 150.1, 148.9, 147.7, 136.4, 132.4, 129.6, 120.1, 111.7, 111.3, 68.7, 59.2, 55.9, 55.8, 38.2, 29.9, 26.7, 24.2; IR (NaCl/thin film): 3042, 2934, 2864, 2833, 1669, 1592, 1516, 1464, 1419, 1377, 1360, 1258, 1238, 1156, 1140, 1077, 1028, 951, 885, 819, 788; HRMS (ES<sup>+</sup>) calc'd for  $\text{C}_{21}\text{H}_{29}\text{BrNO}_4\text{S}$  [ $\text{M}+\text{H}$ ]<sup>+</sup> 470.0995, found 470.1003;  $[\alpha]_{\text{D}}^{25}$ : +22.7 ( $c$ , 0.85,  $\text{CH}_2\text{Cl}_2$ ).

<sup>1</sup> Sulfinimine **14** was prepared from 2-bromo-4-methoxyphenol in two steps as previously described. See K. V. Chuang, R. Navarro, S. E. Reisman. *Chem. Sci.* **2011**, 2, 1086.

<sup>2</sup> 3,4-Dimethoxyphenethylmagnesium bromide was readily prepared from commercially available 3,4-dimethoxyphenethyl bromide and magnesium turnings (1.1 equiv), activated with catalytic diisobutylaluminum hydride, in refluxing THF.

**Minor Diastereomer (*R,S*) – 21** –  $^1\text{H}$  NMR (500 MHz,  $\text{CDCl}_3$ )  $\delta$  7.03 (d,  $J = 10.0$  Hz, 1H), 6.90 (d,  $J = 1.7$  Hz, 1H), 6.79 (d,  $J = 8.1$  Hz, 1H), 6.66 (dd,  $J = 8.1, 2.0$  Hz, 1H), 6.61 (d,  $J = 2.0$  Hz, 1H), 6.52 (dd,  $J = 10.0, 1.7$  Hz, 1H), 3.86 (s, 3H), 3.85 (s, 3H), 2.53 – 2.45 (m, 1H), 2.39 (s, 3H), 2.38 – 2.31 (m, 1H), 2.27 – 2.17 (m, 2H), 1.27 (s, 9H);  $^{13}\text{C}$  NMR (126 MHz,  $\text{CDCl}_3$ ) 183.0, 149.9, 149.7, 149.0, 147.7, 136.3, 132.5, 130.9, 120.1, 111.7, 111.4, 68.8, 59.9, 55.9, 55.9, 38.9, 29.8, 27.3, 24.3; IR (NaCl/thin film): 3042, 2956, 2933, 2866, 1834, 1670, 1640, 1597, 1516, 1464, 1454, 1418, 1382, 1360, 1258, 1238, 1157, 1140, 1075, 1029, 952, 924, 887, 816, 779, 733; HRMS (ES<sup>+</sup>) calc'd for  $\text{C}_{21}\text{H}_{29}\text{BrNO}_4\text{S}$   $[\text{M}+\text{H}]^+$  470.0995, found 470.1002;  $[\alpha]_{\text{D}}^{25}$ : + 70.6 ( $c$  0.96,  $\text{CH}_2\text{Cl}_2$ ).

### Preparation of Trienone 24

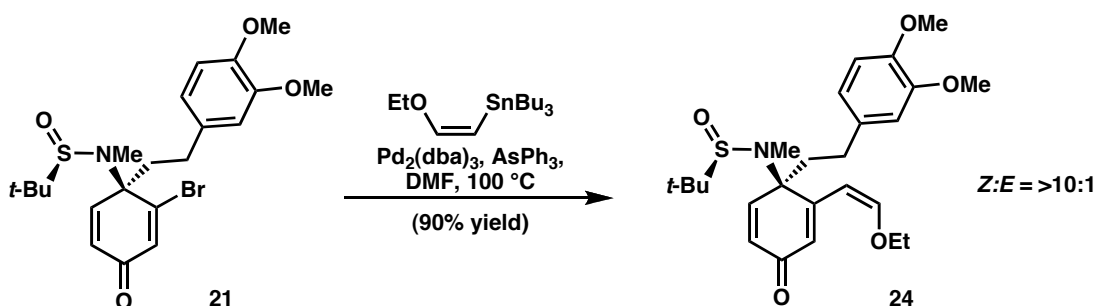

To a solution of dienone **21** (2.30 g, 4.89 mmol) in DMF (49 mL) was added tris(dibenzylideneacetone)dipalladium (224 mg, 0.245 mmol, 0.5 equiv), triphenylarsine (299 mg, 0.979 mmol, 0.20 equiv) and *cis*-2-ethoxyvinyltributylstannane (1.8 mL, 5.4 mmol, 1.1 equiv). The solution was then thoroughly degassed with nitrogen for 30 minutes and the solution heated at 100 °C for 1 hour. Upon cooling to room temperature, the solution was passed through a short plug of Celite, diluted with EtOAc (300 mL), and washed with  $\text{H}_2\text{O}$  (3 x 150 mL). The aqueous layers were then combined and back-extracted with EtOAc (3 x 100 mL), and the organic layers combined and dried over  $\text{MgSO}_4$ , filtered, and concentrated in vacuo to afford a light brown oil. Flash chromatography (50% to 100% EtOAc in Hexanes) afforded **24** (>10:1 mixture of *Z*:*E*-isomers by  $^1\text{H}$  NMR) as a tan solid (2.02 g, 4.37 mmol, 91% yield).

The individual olefin isomers could be chromatographically separated for characterization purposes: (*Z*)-**24**:  $^1\text{H}$  NMR (500 MHz,  $\text{CDCl}_3$ )  $\delta$  7.16 (d,  $J = 1.8$  Hz, 1H), 6.74 (d,  $J = 8.1$  Hz, 1H), 6.54 (d,  $J = 2.0$  Hz, 1H), 6.53 (d,  $J = 10.0$  Hz, 1H), 6.35 (dd,  $J = 10.0$  Hz, 2.0 Hz, 1H), 5.15 (d,  $J = 7.0$  Hz, 1H), 4.05 (q,  $J = 7.0$  Hz, 2H), 3.81 (s, 3H), 3.81 (s, 3H), 2.53 – 2.42 (m, 1H), 2.42 (s, 3H), 2.32 – 2.26 (m, 2H), 1.88 – 1.80 (m, 1H), 1.32 (t,  $J = 7.1$  Hz, 3H), 1.21 (s, 9H);  $^{13}\text{C}$  NMR (126 MHz,  $\text{CDCl}_3$ )  $\delta$  186.6, 154.7, 153.5, 149.4, 148.7, 147.4, 133.3, 130.4, 128.7, 119.9, 111.7, 111.2, 98.7, 70.8, 66.5, 58.8, 55.8, 55.7, 38.3, 29.9, 27.0, 24.4, 15.3; IR (NaCl/thin film): 2958, 2934, 2835, 1660, 1623, 1575, 1516, 1464, 1455, 1303, 1261, 1238, 1180, 1156, 1238, 1180, 1156, 1141, 1099, 1055, 1030, 959, 935, 896, 804, 765, 735; HRMS (EI<sup>+</sup>) calc'd for  $\text{C}_{25}\text{H}_{36}\text{NO}_3\text{S}$   $[\text{M}+\text{H}]^+$  462.2309, found 462.2320;  $[\alpha]_{\text{D}}^{25}$ : – 80 ( $c$  1.07,  $\text{CH}_2\text{Cl}_2$ ). (*E*)-**24**:  $^1\text{H}$  NMR (500 MHz,  $\text{CDCl}_3$ )  $\delta$  7.22 (d,  $J = 12.7$  Hz, 1H), 6.78 (d,  $J = 8.1$  Hz, 1H), 6.61 (dd,  $J = 8.1, 2.0$  Hz, 1H), 6.59 (d,  $J = 10.0$  Hz, 1H), 6.56 (d,  $J = 2.2$  Hz, 1H), 6.45 (d,  $J = 2.0$  Hz, 1H), 6.39 (dd,  $J = 10.0, 2.0$  Hz, 1H), 5.82 (d,  $J = 12.5$  Hz, 1H), 3.98 (app q,  $J = 7.0$  Hz, 1H), 3.85 (app s, 6H), 2.52 – 2.43 (m, 1H), 2.46 (s, 3H), 2.35 – 2.19 (m, 2H), 1.89 (td,  $J = 12.3, 5.0$  Hz, 1H), 1.35

(t,  $J = 7.1$  Hz, 3H), 1.26 (s, 9H);  $^{13}\text{C}$  NMR (126 MHz,  $\text{CDCl}_3$ )  $\delta$  185.7, 157.4, 153.7, 149.8, 148.9, 147.6, 133.1, 130.6, 122.3, 120.0, 111.8, 111.3, 100.3, 67.0, 66.0, 59.0, 55.9, 55.8, 38.5, 29.9, 27.3, 24.5, 14.5; IR (NaCl/thin film): 2956, 2924, 2853, 1659, 1620, 1579, 1516, 1464, 1418, 1388, 1361, 1331, 1260, 1238, 1213, 1142, 1068, 1029, 956, 889, 800, 764; HRMS (EI+) calc'd for  $\text{C}_{25}\text{H}_{36}\text{NO}_3\text{S}$   $[\text{M}+\text{H}]^+$  462.2309, found 462.2330.  $[\alpha]_{\text{D}}^{25}$ :  $-80$  (c 1.07,  $\text{CH}_2\text{Cl}_2$ ).

### Preparation of Enamine S1

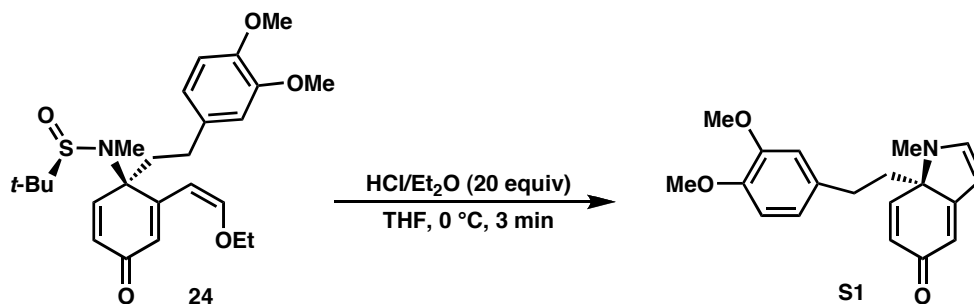

To a solution of trienone **24** (318.3 mg, 0.668 mmol) in THF (13 mL) at  $0^\circ\text{C}$  in an ice/water bath was added a solution of hydrogen chloride (2.0 M solution in  $\text{Et}_2\text{O}$ , 7.0 mL, 14 mmol) dropwise by syringe over one minute. The reaction was allowed to stir for 3 minutes at  $0^\circ\text{C}$  and then quenched by the addition of aqueous potassium hydroxide (10% w/v, 10 mL) and stirred for an additional 10 minutes. The mixture was then diluted with  $\text{H}_2\text{O}$  (10 mL), and extracted with  $\text{EtOAc}$  (5 x 20 mL). The organic layers were then combined, dried over  $\text{Na}_2\text{SO}_4$ , filtered, and concentrated in vacuo to isolate a bright red foam that was used immediately in the next step without further purification.

A sample was purified by flash chromatography (1% to 5% MeOH in  $\text{CH}_2\text{Cl}_2$ ) for characterization purposes:  $^1\text{H}$  NMR (500 MHz,  $\text{CDCl}_3$ ): 6.98 (dd,  $J = 9.9$  Hz, 0.6 Hz, 1H), 6.89 (d,  $J = 3.2$  Hz, 1H), 6.73 (d,  $J = 8.3$  Hz, 1H), 6.60 (dd,  $J = 8.2$  Hz, 2.1 Hz, 1H), 6.56 (d,  $J = 2.2$  Hz, 1H), 6.16 (dd,  $J = 9.8$  Hz, 1.7 Hz, 1H), 5.88 (d,  $J = 1.5$  Hz, 1H), 5.47 (dd,  $J = 3.3$ , 0.6 Hz, 1H), 3.83 (s, 3H), 3.81 (s, 3H), 3.04 (s, 3H), 2.41–2.30 (m, 2H), 2.08–1.98 (m, 2H);  $^{13}\text{C}$  NMR (126 MHz,  $\text{CDCl}_3$ ): 184.7, 174.5, 153.4, 148.8, 147.4, 140.1, 132.9, 131.1, 120.1, 111.7, 111.3, 109.8, 99.6, 72.6, 55.8, 55.8, 45.8, 31.5, 29.1. IR (NaCl/thin film): 2934, 2834, 1631, 1592, 1568, 1515, 1465, 1313, 1260, 1237, 1156, 1108, 1089, 1050, 1028, 977, 884, 830, 766; HRMS (ES+) calc'd for  $[\text{M}+\text{H}]^+$  312.1594, found 312.1585.  $[\alpha]_{\text{D}}^{25}$ :  $-1650$  (c 0.41,  $\text{CH}_2\text{Cl}_2$ ).

### Preparation of Amine 13a

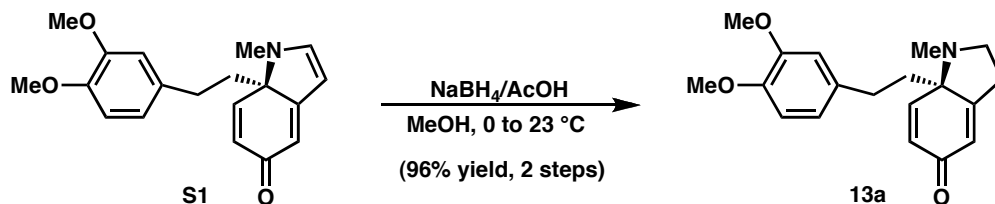

To a solution of crude enamine **S1** (220 mg) in MeOH (14 mL) at  $0^\circ\text{C}$  was added a solution of  $\text{NaBH}_4$  (50 mg, 1.32 mmol) in AcOH (5 mL), dropwise by syringe. The solution was

stirred at 0 °C for 10 minutes before warming to 20 °C and stirring continued for 1 hour. The reaction was cooled to 0 °C in an ice/water bath and quenched by the slow addition of potassium hydroxide (30% w/v, 20 mL). The solution was then diluted with H<sub>2</sub>O (10 mL) and extracted with EtOAc (5 x 20 mL). The organic layers were then combined, dried over Na<sub>2</sub>SO<sub>4</sub>, filtered, concentrated in vacuo to afford an orange oil. Purification by flash chromatography (2% to 4% MeOH in CH<sub>2</sub>Cl<sub>2</sub>) afforded amine **13a** as a yellow oil (200 mg, 0.638 mmol, 96% yield over two steps). <sup>1</sup>H NMR (500 MHz, CDCl<sub>3</sub>) δ 6.96 (d, *J* = 10.0 Hz, 1H), 6.75 (d, *J* = 8.2 Hz, 1H), 6.61 (dd, *J* = 8.2 Hz, 2.1 Hz, 1H), 6.57 (d, *J* = 2.0 Hz, 1H), 6.32 (dd, *J* = 10.0, 1.6 Hz, 1H), 6.18 (dt, *J* = 2.3, 1.5 Hz, 1H), 3.84 (s, 3H), 3.82 (s, 3H), 3.16 (ddd, *J* = 10.5, 8.6, 4.2 Hz, 1H), 3.07 – 2.99 (m, 1H), 2.81 – 2.67 (m, 2H), 2.40 (s, 3H), 2.39 – 2.31 (m, 1H), 2.27 – 2.17 (m, 1H), 1.90–1.79 (m, 2H); <sup>13</sup>C NMR (126 MHz, CDCl<sub>3</sub>) δ 186.6, 166.9, 148.8, 147.4, 145.9, 133.6, 130.2, 123.3, 119.8, 111.6, 111.3, 66.5, 55.9, 55.8, 51.6, 36.5, 32.0, 29.6, 27.8; IR (NaCl/thin film): 2934, 2834, 2789, 1667, 1642, 1606, 1590, 1515, 1464, 1452, 1418, 1259, 1464, 1452, 1259, 1234, 1176, 1152, 1028, 890, 809, 764; HRMS (EI+) calc'd for C<sub>19</sub>H<sub>24</sub>NO<sub>3</sub> [M+H]<sup>+</sup> 314.1751, found 314.1748. [α]<sub>D</sub><sup>25</sup>: –40.6 (*c* 0.89, CH<sub>2</sub>Cl<sub>2</sub>).

### Preparation of 7,8-Didemethoxyrunanine (12a)

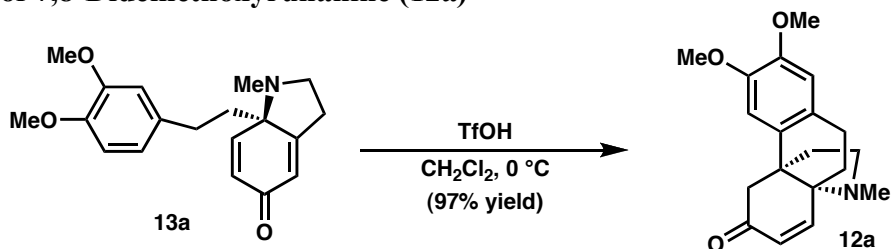

To a solution of amine **13a** (370 mg, 1.18 mmol, 1.0 equiv) in CH<sub>2</sub>Cl<sub>2</sub> (24 mL) at 0 °C was added trifluoromethanesulfonic acid (0.522 mL, 5.90 mmol, 5.0 equiv) dropwise by syringe. The solution was stirred for 5 minutes, then quenched with a saturated solution of aqueous NaHCO<sub>3</sub> (50 mL). The mixture was then washed with additional saturated aqueous NaHCO<sub>3</sub> (3 x 50 mL), then the aqueous layers combined and back extracted with CH<sub>2</sub>Cl<sub>2</sub> (1 x 100 mL). The organic layers were then combined, dried over Na<sub>2</sub>SO<sub>4</sub>, filtered, and concentrated in vacuo to afford a tan foam. Flash chromatography (1% to 2% MeOH in CH<sub>2</sub>Cl<sub>2</sub>) afforded propellane **12a** as a white foam (360 mg, 1.15 mmol, 97% yield). <sup>1</sup>H NMR (500 MHz, CDCl<sub>3</sub>) δ 6.84 (d, *J* = 10.4 Hz, 1H), 6.69 (s, 1H), 6.53 (s, 1H), 6.14 (dd, *J* = 10.4 Hz, 1.0 Hz, 1H), 3.84 (s, 3H), 3.83 (s, 3H), 2.98 – 2.84 (m, 2H), 2.91 (dd, *J* = 16.5 Hz, 1.1 Hz, 1H), 2.60 – 2.54 (m, 1H), 2.56 (d, *J* = 16.5 Hz, 1H), 2.47 – 2.40 (m, 1H), 2.45 (s, 3H), 2.32 – 2.22 (m, 1H), 2.07 – 1.97 (m, 2H), 1.82 – 1.71 (m, 1H); <sup>13</sup>C NMR (126 MHz, CDCl<sub>3</sub>) δ 198.8, 150.3, 147.9, 147.1, 135.7, 129.9, 126.3, 111.1, 110.5, 63.1, 56.1, 55.8, 51.6, 49.5, 48.3, 36.2, 33.3, 25.1, 24.6; IR (NaCl/thin film): 2929, 2851, 2832, 2790, 2252, 1681, 1610, 1515, 1464, 1452, 1356, 1255, 1207, 1140, 1068, 1035, 1010, 916, 886, 856, 730; HRMS (EI+) calc'd for C<sub>19</sub>H<sub>24</sub>NO<sub>3</sub> [M+H]<sup>+</sup> 314.1751, found 314.1748. [α]<sub>D</sub><sup>25</sup>: –243 (*c* 0.44, CH<sub>2</sub>Cl<sub>2</sub>).

### Preparation of Hemiaminal 28

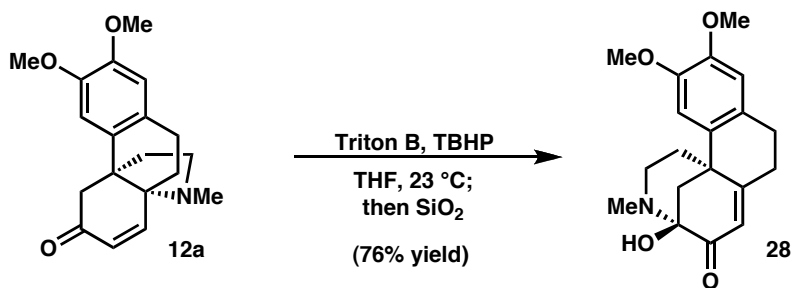

To a solution of enone **12a** (93.8 mg, 0.299 mmol, 1.0 equiv) in THF (3.0 mL) at 23 °C was added *tert*-butylhydroperoxide (214  $\mu$ L of a 70% aq. solution, 1.50 mmol, 5.0 equiv) and Triton B (110  $\mu$ L of a 40% solution in methanol, 0.239 mmol, 0.8 equiv) dropwise by syringe, and the solution stirred for 17 hours at room temperature (23 °C). The reaction was then quenched by the addition of a solution of saturated aqueous Na<sub>2</sub>S<sub>2</sub>O<sub>3</sub> (7 mL) and stirred for an additional 30 minutes. H<sub>2</sub>O (15 mL) was then added, the solution extracted with CH<sub>2</sub>Cl<sub>2</sub> (3 x 20 mL), and the organic layers combined, dried over Na<sub>2</sub>SO<sub>4</sub>, filtered, and concentrated in vacuo to afford a clear oil. The oil was then redissolved in CH<sub>2</sub>Cl<sub>2</sub> (2 mL), then loaded onto dry silica gel and allowed to sit for 2 hours. Flash chromatography (60 to 100% EtOAc in hexanes) afforded hemiaminal **28** as a white foam (75.0 mg, 0.228 mmol, 76% yield). <sup>1</sup>H NMR (500 MHz, CDCl<sub>3</sub>)  $\delta$  6.86 (s, 1H), 6.57 (s, 1H), 6.21 (s, 1H), 4.27 (br s, 1H), 3.85 (s, 3H), 3.85 (s, 3H), 3.02 (ddd, *J* = 12.2, 5.3, 1.6 Hz, 1H), 2.94 – 2.81 (m, 2H), 2.67 – 2.57 (m, 2H), 2.46 (td, *J* = 12.5, 3.7 Hz, 1H), 2.45 (d, *J* = 12.5 Hz, 1H), 2.28 (td, *J* = 13.3, 5.3 Hz, 1H), 2.24 (s, 3H), 2.12 (dd, *J* = 12.5, 2.9 Hz, 1H), 1.70 – 1.64 (m, 1H); <sup>13</sup>C NMR (126 MHz, CDCl<sub>3</sub>)  $\delta$  194.5, 168.0, 148.2, 147.6, 132.2, 127.2, 124.8, 111.0, 108.5, 83.1, 55.9, 55.8, 49.2, 46.8, 43.5, 36.3, 35.9, 31.2, 29.8; IR (NaCl/thin film): 3468, 2933, 2848, 1666, 1619, 1517, 1465, 1354, 1259, 1228, 1187, 1124, 1089, 1006, 914, 870, 789, 729; HRMS (EI+) calc'd for C<sub>19</sub>H<sub>24</sub>NO<sub>4</sub> [M+H]<sup>+</sup> 330.1700, found 330.1713; [ $\alpha$ ]<sub>D</sub><sup>25</sup>: –204 (*c* 0.65, CH<sub>2</sub>Cl<sub>2</sub>).

### Preparation of Cepharatine D (10)

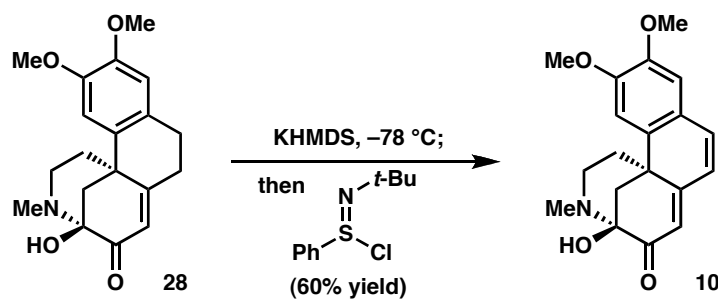

To a solution of hemiaminal **28** (30 mg, 91  $\mu$ mol, 1.0 equiv) in THF (1.8 mL) at –78 °C was added a solution of KHMDS in THF (0.21 mL of a 0.9 M solution in THF, 0.191 mmol, 2.1 equiv). The yellow solution was stirred at –78 °C for 10 minutes, then warmed to 0 °C and stirred for 20 minutes. The solution was again cooled to –78 °C, and a solution of *N*-*tert*-butylbenzenesulfinimidoyl chloride (27.6 mg, 0.128 mmol, 1.4 equiv) in THF (0.25 mL) added dropwise. After 50 minutes, the solution was quenched with saturated aqueous ammonium chloride (20 mL), warmed to room temperature, and extracted with EtOAc (3 x 20 mL). The

organic layers were then combined, dried over Na<sub>2</sub>SO<sub>4</sub>, filtered, and concentrated in vacuo. Flash chromatography (1 to 2 % MeOH in CH<sub>2</sub>Cl<sub>2</sub>) afforded (–)-cepharatine D (**10**) as a bright yellow foam (18.0 mg, 55.0 μmol, 60% yield). <sup>1</sup>H NMR (500 MHz, CDCl<sub>3</sub>) δ 6.99 (s, 1H), 6.74 (d, *J* = 9.5 Hz, 1H), 6.72 (s, 1H), 6.32 (d, *J* = 9.3 Hz, 1H), 6.15 (s, 1H), 4.42 (br s, 1H), 3.90 (s, 3H), 3.89 (s, 3H), 2.87 (ddd, *J* = 12.6, 5.1, 1.6 Hz, 1H), 2.75 (d, *J* = 12.2 Hz, 1H), 2.62 (td, *J* = 12.7, 3.7 Hz, 1H), 2.31 (dd, 12.2, 2.9 Hz, 1H), 2.24 (s, 3H), 1.98 (td, *J* = 13.1, 5.1 Hz, 1H), 1.58 (m, 1H); <sup>13</sup>C NMR (126 MHz, CDCl<sub>3</sub>) δ 193.4, 161.4, 150.3, 147.9, 135.9, 135.5, 124.2, 123.5, 123.2, 111.6, 107.6, 83.0, 56.1, 56.0, 46.8, 56.0, 46.8, 45.0, 43.7, 38.1, 36.0; <sup>1</sup>H NMR (500 MHz, methanol-*d*<sub>4</sub>) δ 7.07 (s, 1H), 6.90 (s, 1H), 6.84 (d, *J* = 9.3 Hz, 1H), 6.37 (d, *J* = 9.3 Hz, 1H), 6.10 (s, 1H), 3.91 (s, 3H), 3.84 (s, 3H), 2.82 (dd, *J* = 12.7, 4.9 Hz, 1H), 2.68 (d, *J* = 12.2 Hz, 1H), 2.56 (td, *J* = 12.8, 3.5 Hz, 1H), 2.23 (d, *J* = 12.2, 2.8 Hz, 1H), 2.21 (s, 3H), 1.92 (td, *J* = 13.2, 5.1 Hz, 1H), 1.58 – 1.50 (m, 1H); <sup>13</sup>C NMR (126 MHz, methanol-*d*<sub>4</sub>) δ 194.7, 162.7, 151.8, 149.6, 137.1, 136.9, 126.0, 125.4, 124.1, 113.5, 109.5, 84.7, 56.7, 56.6, 47.9, 46.4, 44.9, 39.0, 36.7; IR (NaCl/thin film): 3455, 2925, 2843, 1732, 1650, 1608, 1554, 1516, 1463, 1376, 1340, 1275, 1235, 1190, 1135, 1081, 877, 784; HRMS (EI<sup>+</sup>) calc'd for C<sub>19</sub>H<sub>21</sub>NO<sub>4</sub> [M+H]<sup>+</sup> 328.1543, found 330.1552; [α]<sub>D</sub><sup>25</sup> = – 227 (*c* 0.51, MeOH).

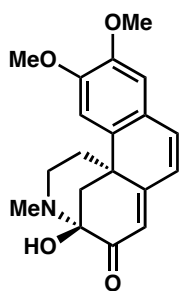

(–)-Cepharatine D

### Comparison of Spectroscopic Data for Natural<sup>3</sup> and Synthetic (–)-Cepharatine D

#### <sup>1</sup>H NMR Data (both spectra are referenced to 3.30 ppm)

| Reported <sup>3</sup>            | Synthetic                              |
|----------------------------------|----------------------------------------|
| 7.06 (s, 1H)                     | 7.07 (s, 1H)                           |
| 6.89 (s, 1H)                     | 6.90 (s, 1H)                           |
| 6.84 (d, <i>J</i> = 9.2 Hz, 1H)  | 6.84 (d, <i>J</i> = 9.3 Hz, 1H)        |
| 6.36 (d, <i>J</i> = 9.2 Hz, 1H)  | 6.37 (d, <i>J</i> = 9.3 Hz, 1H)        |
| 6.10 (s, 1H)                     | 6.10 (s, 1H)                           |
| 3.92 (s, 3H)                     | 3.91 (s, 3H)                           |
| 3.83 (s, 3H)                     | 3.84 (s, 3H)                           |
| 2.90 (m, 1H)                     | 2.82 (dd, <i>J</i> = 12.7, 4.9 Hz, 1H) |
| 2.67 (d, <i>J</i> = 12.0 Hz, 1H) | 2.68 (d, <i>J</i> = 12.2 Hz, 1H)       |
| 2.66 (m, 1H)                     | 2.56 (td, <i>J</i> = 12.8, 3.5 Hz, 1H) |
| 2.19 (m, 1H)                     | 2.23 (d, <i>J</i> = 12.2, 2.8 Hz, 1H)  |

<sup>3</sup> <sup>1</sup>H NMR data (Table 1) for cepharatine D was found to be inconsistent with the authentic spectral data provided in the paper's supporting information. Values listed in the comparison table are those provided in the supporting information. See: L. He, Y.-H. Zhang, H.-Y. Guan, J.-X. Zhang, Q.-Y. Sun, X.-J. Hao, *J. Nat. Prod.* **2011**, *74*, 181.



2.18 (s, 3H)  
2.02 (m, 1H)  
1.59 (m, 1H)

2.21 (s, 3H)  
1.92 (td,  $J = 13.2, 5.1$  Hz, 1H)  
1.58 – 1.50 (m, 1H)

**$^{13}\text{C}$  NMR Comparison Data (both spectra are referenced to 49.0 ppm)**

**Reported**

194.7  
162.7  
151.7  
149.5  
137.0  
136.9  
126.0  
125.3  
124.1  
113.4  
109.3  
84.7  
56.6  
56.5  
47.8  
46.4  
44.8  
39.0  
36.7

**Synthetic**

194.7  
162.7  
151.8  
149.6  
137.1  
136.9  
126.0  
125.4  
124.1  
113.5  
109.5  
84.7  
56.7  
56.6  
47.9  
46.4  
44.9  
39.0  
36.7

**Optical Rotation\***

**Natural**

$[\alpha]_{\text{D}}^{17}$ : -321 ( $c$  1.01, MeOH)

**Synthetic**

$[\alpha]_{\text{D}}^{17}$ : -227 ( $c$  0.51, MeOH)\*

\* It was noted that synthetic (-)-cepharatine D produced a significantly lower specific rotation than reported by the isolation paper. To eliminate the possibility of racemization during the reaction sequence, racemic cepharatine D was synthesized using racemic *tert-butylsulfonamide* in place of (*R*)-*tert*-butylsulfonamide by an identical sequence, and the enantiomeric excess of (-)-cepharatine D was determined to be > 99% ee by chiral SFC (see Chiral SFC Traces).

## Chiral SFC Traces

Method Information: OD-H column, 20% IPA, 12.0 minutes.

### *rac*-10<sup>4</sup>:

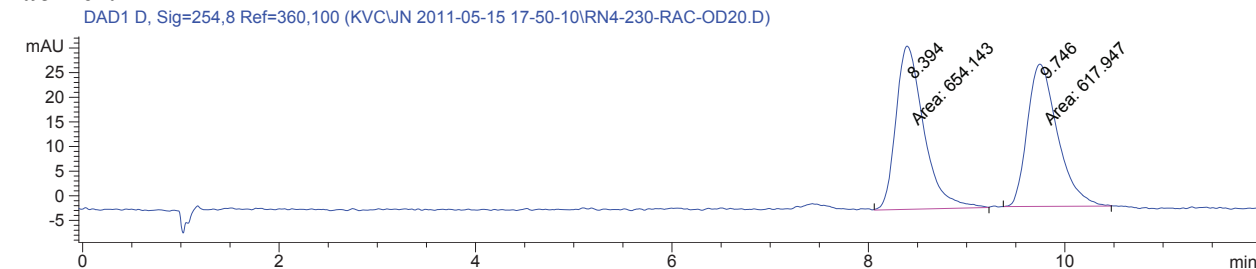

| Peak #   | RetTime [min] | Type | Width [min] | Area [mAU*s] | Height [mAU] | Area %  |
|----------|---------------|------|-------------|--------------|--------------|---------|
| 1        | 8.394         | MM   | 0.3287      | 654.14319    | 33.16994     | 51.4227 |
| 2        | 9.746         | MM   | 0.3563      | 617.94702    | 28.90520     | 48.5773 |
| Totals : |               |      |             | 1272.09021   | 62.07514     |         |

### (-)-10:

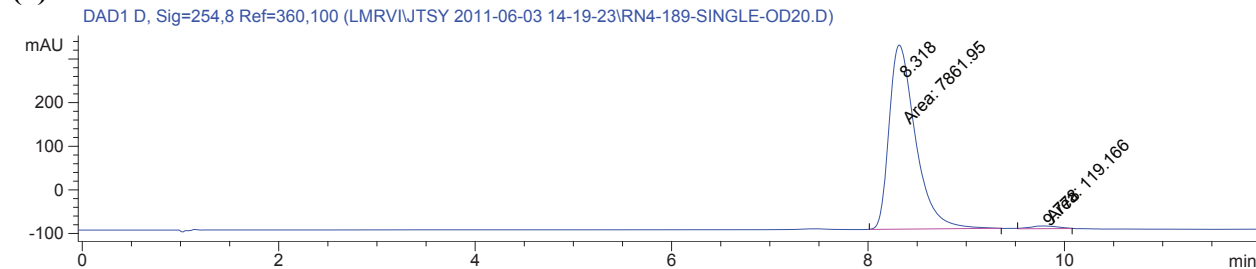

| Peak #   | RetTime [min] | Type | Width [min] | Area [mAU*s] | Height [mAU] | Area %  |
|----------|---------------|------|-------------|--------------|--------------|---------|
| 1        | 8.318         | MM   | 0.3103      | 7861.95264   | 422.33008    | 98.5069 |
| 2        | 9.778         | MM   | 0.3079      | 119.16633    | 6.45073      | 1.4931  |
| Totals : |               |      |             | 7981.11897   | 428.78081    |         |

<sup>4</sup> *rac*-10 was prepared using an identical synthetic sequence from racemic *tert*-butylsulfonamide in place of (*R*)-*tert*-butylsulfonamide.

## Preparation of Epoxyketone 27

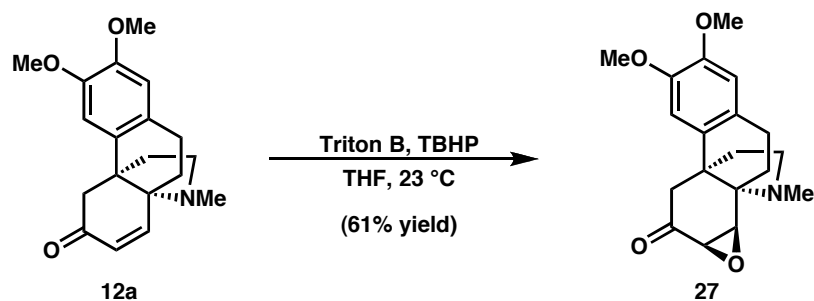

To a solution of enone **12a** (62.6 mg, 0.200 mmol, 1.0 equiv) in THF (2.0 mL) at 23 °C was added *tert*-butylhydroperoxide (143  $\mu$ L of a 70% aq. solution, 1.0 mmol, 3.0 equiv.) and Triton B (73  $\mu$ L of a 40% solution in methanol, 0.16  $\mu$ mmol, 0.8 equiv) dropwise by syringe, and the solution stirred for 17 hours at room temperature (23 °C). The reaction was then quenched by the addition of a solution of saturated aqueous Na<sub>2</sub>S<sub>2</sub>O<sub>3</sub> (6 mL) and stirred for an additional 30 minutes. H<sub>2</sub>O (15 mL) was then added, the solution extracted with CH<sub>2</sub>Cl<sub>2</sub> (3 x 20 mL), and the organic layers combined, dried over Na<sub>2</sub>SO<sub>4</sub>, filtered, and concentrated in vacuo to afford a clear oil. Flash chromatography (30 to 50% EtOAc in hexanes) on Florisil (100 to 200 mesh) afforded epoxyketone **27** as a white foam (40.0 mg, 0.075 mmol, 61% yield). <sup>1</sup>H NMR (500 MHz, CDCl<sub>3</sub>)  $\delta$  6.58 (s, 1H), 6.52 (s, 1H), 3.84 (s, 2H), 3.82 (s, 2H), 3.49 (d, *J* = 3.9 Hz, 1H), 3.32 (dd, *J* = 3.8, 1.0 Hz, 1H), 2.95 (d, *J* = 14.0 Hz, 1H), 2.77 (m, 3H), 2.63 (dt, *J* = 16.0, 3.9 Hz, 1H), 2.56 (s, 3H), 2.50 (dd, *J* = 14.0, 1.0 Hz, 1H), 2.21 – 2.16 (m, 2H), 2.10 (ddd, *J* = 13.2, 8.0, 5.3 Hz, 1H), 2.01 – 1.94 (m, 1H); <sup>13</sup>C NMR (126 MHz, CDCl<sub>3</sub>)  $\delta$  207.1, 147.8, 147.2, 134.5, 127.4, 110.7, 110.1, 60.5, 60.4, 56.0, 56.0, 55.7, 52.5, 51.4, 45.8, 37.2, 33.3, 24.9, 24.33; IR (NaCl/thin film): 2934, 2833, 2792, 1716, 1610, 1516, 1464, 1454, 1358, 1330, 1256, 1202, 1142, 1070, 1005, 973, 873, 853, 801, 733; HRMS (EI<sup>+</sup>) calc'd for C<sub>19</sub>H<sub>23</sub>NO<sub>4</sub> [M+H]<sup>+</sup> 330.1700, found 330.1710; [ $\alpha$ ]<sub>D</sub><sup>25</sup>: + 30 (*c* 0.70, CH<sub>2</sub>Cl<sub>2</sub>).

## Preparation of 8-Demethoxyrunanine (1)

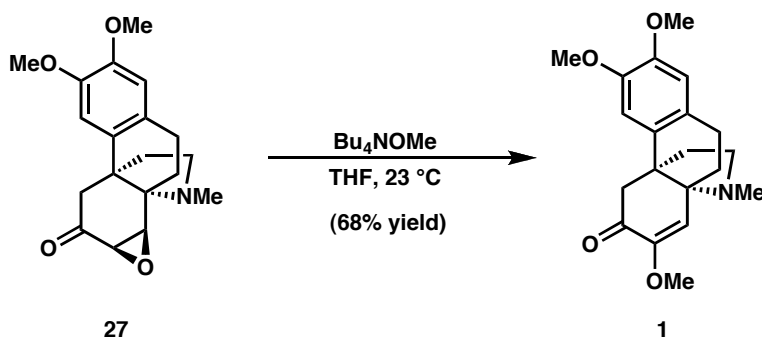

To epoxyketone **27** (40.8 mg, 0.124 mmol, 1.0 equiv) was added a freshly prepared solution of tetrabutylammonium methoxide<sup>5</sup> (2.5 mL of a 0.5 M solution in THF, 1.2 mmol, 10

<sup>5</sup> Tetrabutylammonium methoxide (Bu<sub>4</sub>NOMe) was prepared from tetrabutyl ammonium hydroxide as previously described. See V. Di Bussolo, M. Caselli, M. R. Romano, M. Pineschi, and P. Crotti. *J. Org. Chem.* 2004, 69, 8702 – 8708.

equiv) by syringe and the solution was then heated to 50 °C for 11 hours. The reaction was then cooled, diluted with saturated aqueous sodium chloride (10 mL), and extracted with CH<sub>2</sub>Cl<sub>2</sub> (3 x 10 mL). The organic layers were then combined, dried over Na<sub>2</sub>SO<sub>4</sub>, filtered, and concentrated in vacuo to isolate a brown oil that was purified by flash chromatography (SiO<sub>2</sub> deactivated with 0.5% Et<sub>3</sub>N, 40 to 80% EtOAc in Hexanes) to isolate synthetic (–)-8-demethoxyrunanine **1** as a white foam (29.1 mg, 84.8 μmol, 68% yield). <sup>1</sup>H NMR (500 MHz, CDCl<sub>3</sub>) δ 6.67 (s, 1H), 6.52 (s, 1H), 5.64 (s, 1H), 3.84 (s, 3H), 3.83 (s, 3H), 3.65 (s, 3H), 3.04 (d, *J* = 16.6 Hz, 1H), 2.92 (td, *J* = 9.3, 3.7 Hz, 1H), 2.87 (ddd, *J* = 15.9, 12.8, 4.9 Hz), 2.66 (d, *J* = 16.4 Hz, 1H), 2.55 (ddd, *J* = 15.9, 5.0, 2.8 Hz, 1H), 2.44 – 2.37 (m, 1H), 2.42 (s, 3H), 2.26 (ddd, *J* = 13.3, 9.6, 6.2 Hz, 1H), 2.09 – 1.99 (m, 2H), 1.80 (ddd, *J* = 13.9, 12.8, 5.1 Hz, 1H); <sup>13</sup>C NMR (126 MHz, CDCl<sub>3</sub>) δ 193.2, 151.2, 147.9, 147.1, 135.3, 126.4, 114.7, 111.1, 110.6, 63.7, 56.0, 55.8, 55.0, 51.5, 49.6, 48.1, 36.4, 33.5, 26.7, 25.0; IR (NaCl/thin film): 2926, 2848, 2832, 2787, 1693, 1624, 1515, 1463, 1451, 1376, 1356, 1282, 1257, 1217, 1205, 1156, 1136, 1114, 1095, 1066, 1051, 1013, 962, 883, 858, 800, 731, 665 cm<sup>-1</sup>; HRMS (EI+) calc'd for C<sub>20</sub>H<sub>26</sub>NO<sub>4</sub> [M+H]<sup>+</sup> 344.1856, found 344.1863; [α]<sub>D</sub><sup>20</sup>: – 185 (*c* 0.51, CHCl<sub>3</sub>).

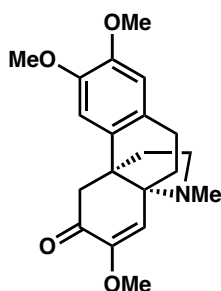

(–)-8-Demethoxyrunanine

### Comparison of Spectroscopic Data for Natural<sup>6</sup> and Synthetic 8–Demethoxyrunanine

#### <sup>1</sup>H NMR Comparison Data

| Reported                                     | Synthetic                                    |
|----------------------------------------------|----------------------------------------------|
| 6.65 (s, 1H)                                 | 6.67 (s, 1H)                                 |
| 6.51 (s, 1H)                                 | 6.52 (s, 1H)                                 |
| 5.63 (s, 1H)                                 | 5.64 (s, 1H)                                 |
| 3.82 (s, 3H)                                 | 3.84 (s, 3H)                                 |
| 3.81 (s, 3H)                                 | 3.83 (s, 3H)                                 |
| 3.63 (s, 3H)                                 | 3.65 (s, 3H)                                 |
| 3.04 (d, <i>J</i> = 16.4 Hz, 1H)             | 3.04 (d, <i>J</i> = 16.6 Hz, 1H)             |
| 2.84 (m, 1H)                                 | 2.92 (td, <i>J</i> = 9.3, 3.7 Hz, 1H)        |
| 2.84 (m, 1H)                                 | 2.87 (ddd, <i>J</i> = 15.9, 12.8, 4.9 Hz)    |
| 2.65 (d, <i>J</i> = 16.4 Hz, 1H)             | 2.66 (d, <i>J</i> = 16.4 Hz, 1H)             |
| 2.55 (ddd, <i>J</i> = 16.0, 4.8, 2.8 Hz, 1H) | 2.55 (ddd, <i>J</i> = 15.9, 5.0, 2.8 Hz, 1H) |
| 2.41 (s, 3H)                                 | 2.42 (s, 3H)                                 |
| 2.39 (m, 1H)                                 | 2.44 – 2.37 (m, 1H)                          |
| 2.25 (m, 1H)                                 | 2.26 (ddd, <i>J</i> = 13.3, 9.6, 6.2 Hz, 1H) |
| 2.05 (m, 1H)                                 | 2.09 – 1.99 (m, 2H)                          |

<sup>6</sup> X. Wang, H. Jin, Z. Li, G. Qin, *Fitoterapia* **2007**, 78, 593.

2.01 (ddd,  $J = 14.0, 4.8, 2.8$  Hz, 1H)  
1.79 (ddd,  $J = 14.0, 13.2, 4.8$  Hz, 1H)

—  
1.80 (ddd,  $J = 13.9, 12.8, 5.1$  Hz, 1H)

### <sup>13</sup>C NMR Comparison Data

| Reported | Synthetic |
|----------|-----------|
| 193.2    | 193.2     |
| 151.1    | 151.2     |
| 147.8    | 147.9     |
| 147.0    | 147.0     |
| 135.2    | 135.3     |
| 126.3    | 126.4     |
| 114.6    | 114.7     |
| 111.0    | 111.1     |
| 110.4    | 110.6     |
| 63.7     | 63.8      |
| 56.0     | 56.1      |
| 55.7     | 55.8      |
| 54.9     | 55.1      |
| 51.4     | 51.5      |
| 49.5     | 49.7      |
| 48.0     | 48.1      |
| 36.3     | 36.4      |
| 33.4     | 33.5      |
| 26.6     | 26.7      |
| 24.8     | 25.0      |

### Optical Rotation

**Natural**  
 $[\alpha]_D^{20}$ : -244 ( $c$  0.48, CHCl<sub>3</sub>)

**Synthetic**  
 $[\alpha]_D^{20}$ : -185 ( $c$  0.51, CHCl<sub>3</sub>)\*

\* It was noted that synthetic (-)-8-demethoxyrunanine produced a significantly lower specific rotation than reported by the isolation paper. To eliminate the possibility of racemization during the reaction sequence, racemic 8-demethoxyrunanine was synthesized using racemic *tert*-butylsulfonamide in place of (*R*)-*tert*-butylsulfonamide by an identical sequence, and the enantiomeric excess of 8-demethoxyrunanine was determined to be > 98% ee by chiral SFC (see Chiral SFC Traces).

## Chiral SFC Traces

Method Information: AD column, 35% IPA, 8.0 minutes.

**rac-1<sup>7</sup>:**

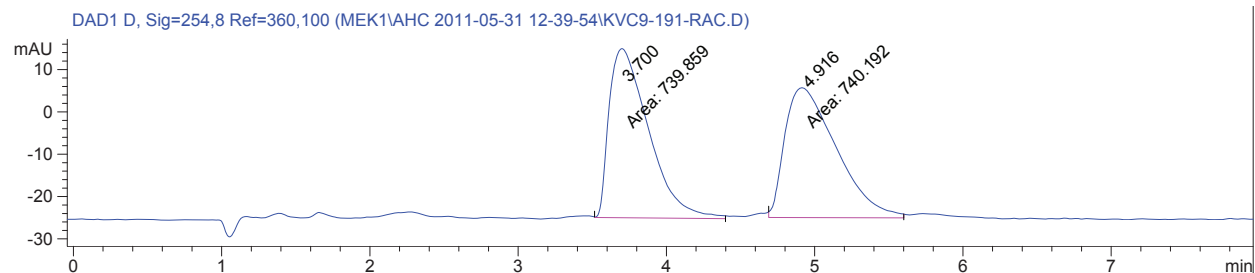

**(-)-1:**

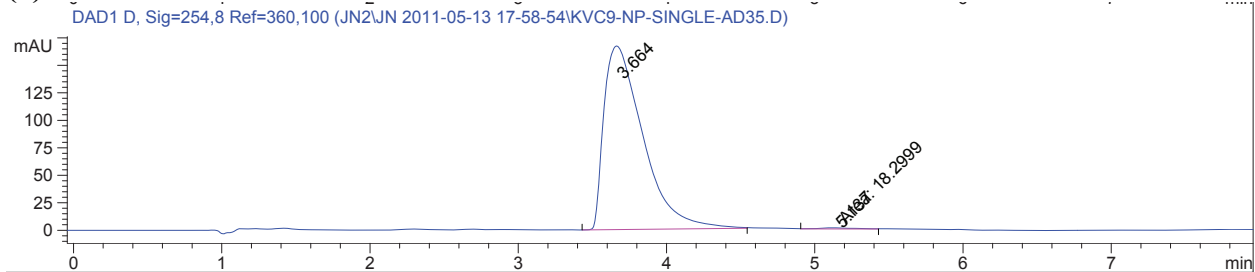

Signal 2: DAD1 D, Sig=254,8 Ref=360,100

| Peak # | RetTime [min] | Type | Width [min] | Area [mAU*s] | Height [mAU] | Area %  |
|--------|---------------|------|-------------|--------------|--------------|---------|
| 1      | 3.664         | BB   | 0.2798      | 3058.54810   | 166.89442    | 99.4052 |
| 2      | 5.137         | MM   | 0.2913      | 18.29991     | 1.04703      | 0.5948  |

Totals : 3076.84801 167.94145

<sup>7</sup> *Rac-1* was prepared using an identical synthetic sequence from racemic *tert*-butylsulfonamide in place of (*R*)-*tert*-butylsulfonamide.

## Preparation of Dienone 22

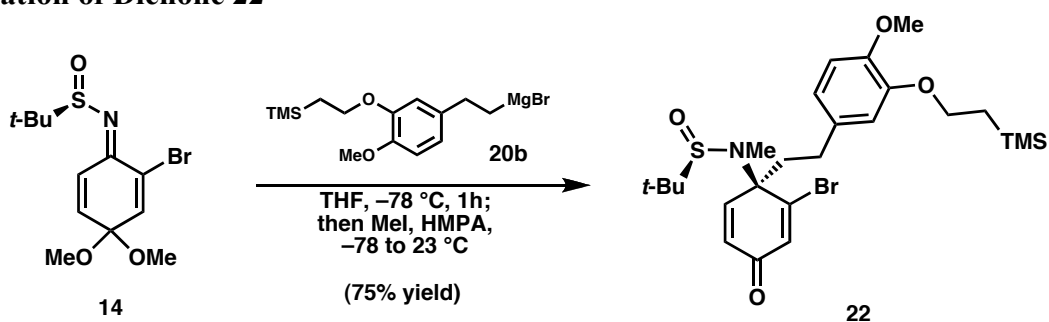

To a solution of bromo-quinonesulfonylimine **14** (2.49 g, 7.42 mmol) in THF (15 mL) at  $-78\text{ }^{\circ}\text{C}$  (dry ice/acetone) was added a solution of Grignard reagent **20b**<sup>8</sup> (0.51M solution in THF, 16.0 mL, 8.16 mmol) dropwise by syringe. The solution was then stirred at  $-78\text{ }^{\circ}\text{C}$  for one hour, then methyl iodide (1.4 mL, 22 mmol) and hexamethylphosphoramide (3.9 mL, 22 mmol) sequentially added dropwise by syringe, and the solution stirred at  $-78\text{ }^{\circ}\text{C}$  for 10 minutes. The solution was then warmed to  $23\text{ }^{\circ}\text{C}$  and stirred for an additional 2.0 hours, then quenched by the addition of aqueous acetic acid (10% v/v, 30 mL). After 3.5 hours, the mixture was diluted with EtOAc (150 mL) and washed with  $\text{H}_2\text{O}$  (3 x 100 mL), and the aqueous layers combined and back extracted with EtOAc (3 x 100 mL). The ethereal layers were then combined, dried over  $\text{MgSO}_4$ , filtered, and concentrated in vacuo to afford a clear brown oil. The diastereoselectivity was determined by LC/MS: 96:4 d.r. (5 $\rightarrow$ 95% MeCN/ $\text{H}_2\text{O}$ ,  $t = 0$ –10 min, 1 mL/min. Major diastereomer:  $t_{\text{R}} = 6.7$  min, minor diastereomer:  $t_{\text{R}} = 7.2$  min). Flash chromatography (20% to 50% EtOAc in Hexanes) afforded a single diastereomer ( $R_{\text{S}},R$ ) of dienone **22** as a white solid foam (3.09 g, 5.55 mmol, 75% yield).

### Major Diastereomer ( $R_{\text{S}},R$ ) – **22**

$^1\text{H}$  NMR (500 MHz,  $\text{CDCl}_3$ ):  $\delta$  6.92 (d,  $J = 1.8$  Hz, 1H), 6.81 (d,  $J = 10.0$  Hz, 1H), 6.77 (d,  $J = 8.2$  Hz, 1H), 6.64 (dd,  $J = 8.1, 2.0$  Hz, 1H), 6.59 (d,  $J = 2.0$  Hz, 1H), 6.43 (dd,  $J = 10.0, 1.8$  Hz, 1H), 4.12 – 4.04 (m, 2H), 3.81 (s, 3H), 2.80 (td,  $J = 12.3, 5.0$  Hz, 1H), 2.46 (s, 3H), 2.38 – 2.22 (m, 2H), 1.84 (td,  $J = 12.4, 5.2$  Hz, 1H), 1.21 (s, 9H), 1.21 – 1.16 (m, 2H), 0.07 (s, 9H);  $^{13}\text{C}$  NMR (126 MHz,  $\text{CDCl}_3$ ):  $\delta$  183.1, 150.7, 150.1, 148.3, 148.2, 136.4, 132.2, 129.6, 120.0, 113.4, 111.7, 68.8, 66.3, 59.2, 55.9, 38.2, 29.8, 26.7, 24.2, 17.8,  $-1.4$ ; IR (NaCl/thin film): 3045, 2951, 2900, 2866, 2834, 1670, 1640, 1592, 1515, 1463, 1455, 1442, 1425, 1360, 1292, 1253, 1236, 1156, 1137, 1079, 1055, 1032, 950, 886, 859, 839, 786; HRMS (EI+) calc'd for  $\text{C}_{25}\text{H}_{38}\text{BrNO}_4\text{SSi}$  [ $\text{M}+\text{Na}$ ]<sup>+</sup> 578.1366, found 578.1555;  $[\alpha]_{\text{D}}^{25}$ :  $+16.9$  ( $c$  0.92,  $\text{CH}_2\text{Cl}_2$ ).

### Minor Diastereomer ( $R_{\text{S}},S$ ) – **22**<sup>9</sup>

$^1\text{H}$  NMR (500 MHz,  $\text{CDCl}_3$ ):  $\delta$  7.03 (d,  $J = 10.0$  Hz, 1H), 6.90 (d,  $J = 1.6$  Hz, 1H), 6.78 (d,  $J = 8.2$  Hz, 1H), 6.64 (dd,  $J = 8.1, 1.9$  Hz, 1H), 6.59 (d,  $J = 1.8$  Hz, 1H), 6.53 (dd,  $J = 9.9, 1.7$  Hz, 1H), 4.09 (m,  $J = 9.3, 7.6$  Hz, 2H), 3.83 (s, 3H), 2.53 – 2.43 (m, 1H), 2.38 (d,  $J = 8.7$  Hz, 3H), 2.37 – 2.27 (m, 2H), 2.26 – 2.15 (m, 3H), 1.28 (s, 9H), 1.25 – 1.15 (m, 2H), 0.08 (s, 9H);  $^{13}\text{C}$

<sup>8</sup> Grignard reagent **20b** was readily prepared from 3-trimethylsilyloxy-4-methoxyphenethyl bromide and magnesium turnings (1.1 equiv), activated with catalytic diisobutylaluminum hydride, in refluxing THF.

<sup>9</sup> Minor diastereomer ( $R_{\text{S}},S$ ) – **22** was inseparable from several impurities.  $^1\text{H}$  and  $^{13}\text{C}$  NMR data were tabulated from samples of  $\sim 85\%$  purity and are listed for reference.

NMR (126 MHz, CDCl<sub>3</sub>):  $\delta$  183.0, 149.9, 149.7, 148.3, 148.2, 136.4, 132.3, 130.9, 120.0, 113.4, 111.7, 68.8, 66.4, 59.8, 55.9, 38.9, 29.7, 27.3, 24.3, 17.8, -1.4.

### Preparation of Trienone 25

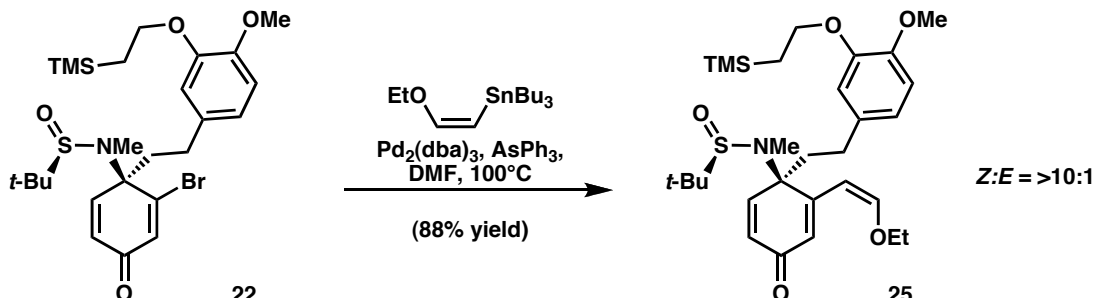

To a solution of dienone **22** (1.28 g, 2.30 mmol, 1.0 equiv) in DMF (19 mL) was added tris(dibenzylideneacetone)dipalladium (105 mg, 0.115 mmol, 0.05 equiv), triphenylarsine (141 mg, 0.460 mmol, 0.20 equiv) and *cis*-2-ethoxyvinyltributylstannane (0.84 mL, 2.53 mmol, 1.1 equiv). The solution was then thoroughly degassed with nitrogen for 30 minutes and the solution heated at 100 °C for 1 hour. Upon cooling to room temperature, the solution was passed through a short plug of Celite, diluted with EtOAc (200 mL), and washed with H<sub>2</sub>O (3 x 100 mL). The aqueous layers were then combined and back extracted with EtOAc (3 x 75 mL), then the organic layers combined, washed with brine (1 x 250 mL), dried over Na<sub>2</sub>SO<sub>4</sub>, filtered, and concentrated in vacuo to afford a light brown oil. Flash chromatography (50% to 100% EtOAc in hexanes) afforded **25** (>10:1 mixture of *Z*:*E*-isomers by <sup>1</sup>H NMR) as a tan solid (1.11 g, 88% yield).

(*Z*)-**25**: <sup>1</sup>H NMR (500 MHz, CDCl<sub>3</sub>):  $\delta$  7.19 (d, *J* = 2.0 Hz, 1H), 6.76 (d, *J* = 8.3 Hz, 1H), 6.61 (d, *J* = 7.1 Hz, 1H), 6.59 (dd, *J* = 8.1, 2.0 Hz, 1H), 6.55 (d, *J* = 10.0 Hz, 1H), 6.55 (d, *J* = 2.2 Hz, 1H), 6.38 (dd, *J* = 10.0, 2.0 Hz, 1H), 5.17 (d, *J* = 7.3 Hz, 1H), 4.09 – 4.02 (m, 4H), 3.81 (s, 3H), 2.51 (ddd, *J* = 12.7, 10.3, 7.1 Hz, 1H), 2.45 (s, 3H), 2.33 – 2.26 (m, 2H), 1.90 – 1.80 (m, 1H), 1.35 (t, *J* = 7.08 Hz, 3H), 1.24 (s, 9H), 1.21 – 1.16 (m, 2H), 0.07 (s, 9H); <sup>13</sup>C NMR (126 MHz, CDCl<sub>3</sub>):  $\delta$  186.7, 154.8, 153.6, 149.5, 148.2, 148.0, 133.2, 130.5, 128.8, 119.9, 113.5, 111.6, 98.8, 70.7, 66.6, 66.3, 58.9, 55.9, 38.3, 29.9, 27.1, 24.4, 17.8, 15.4, -1.4; IR (NaCl/thin film): 2952, 2899, 2834, 1661, 1623, 1576, 1515, 1453, 1384, 1302, 1258, 1157, 1137, 1099, 1055, 957, 896, 859, 839, 803, 767 cm<sup>-1</sup>; HRMS (EI<sup>+</sup>) calc'd for C<sub>29</sub>H<sub>45</sub>NO<sub>5</sub>SSi [M+H]<sup>+</sup> 547.2860, found 548.2850; [ $\alpha$ ]<sub>D</sub><sup>25</sup>: -66 (c 1.34, CH<sub>2</sub>Cl<sub>2</sub>).

(*E*)-**25**: <sup>1</sup>H NMR (500 MHz, CDCl<sub>3</sub>):  $\delta$  7.22 (d, *J* = 12.7 Hz, 1H), 6.77 (d, *J* = 8.3 Hz, 1H), 6.59 (dd, *J* = 8.3, 2.2 Hz, 1H), 6.59 (d, *J* = 10.0 Hz, 1H), 6.54 (d, *J* = 2.0 Hz, 1H), 6.45 (dd, *J* = 2.0, 0.5 Hz, 1H), 6.39 (dd, *J* = 10.0, 2.0 Hz, 1H), 5.81 (d, *J* = 12.8 Hz, 1H), 4.09 – 4.04 (m, 2H), 3.98 (q, *J* = 4.0 Hz, 2H), 3.82 (s, 3H), 2.48 (td, *J* = 12.5, 4.8 Hz, 1H), 2.46 (s, 3H), 2.35 – 2.17 (m, 2H), 1.89 (td, *J* = 12.3, 4.9 Hz, 1H), 1.35 (t, *J* = 7.0 Hz, 1H), 1.26 (s, 9H), 1.22 – 1.17 (m, 2H), 0.08 (s, 9H); <sup>13</sup>C NMR (126 MHz, CDCl<sub>3</sub>):  $\delta$  185.7, 157.4, 153.7, 149.8, 148.3, 148.1, 133.0, 130.6, 122.3, 120.0, 113.5, 111.7, 100.2, 67.1, 66.4, 66.0, 59.9, 56.0, 38.3, 29.8, 27.4, 24.5, 17.9, 14.5, -1.4.; IR (NaCl/thin film): 2951, 2926, 1660, 1620, 1580, 1515, 1456, 1442, 1386, 1361,



1329, 1256, 1235, 1213, 1140, 1069, 1033, 948, 859, 838  $\text{cm}^{-1}$ . HRMS (EI+) calc'd for  $\text{C}_{29}\text{H}_{45}\text{NO}_5\text{SSi}$   $[\text{M}+\text{H}]^+$  547.2860, found 548.2857;  $[\alpha]_{\text{D}}^{25}$ :  $-71$  ( $c$  0.20,  $\text{CH}_2\text{Cl}_2$ ).

### Preparation of Enamine S2

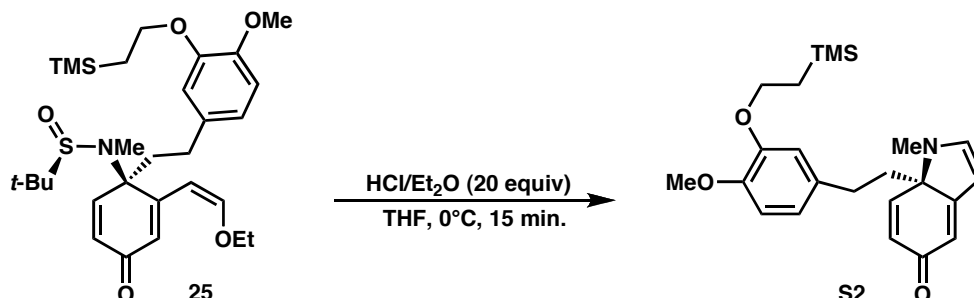

To a solution of trienone 25 (702 mg, 1.28 mmol, 1.0 equiv) in THF (12.8 mL) at  $0^\circ\text{C}$  in an ice/water bath was added a solution of hydrogen chloride (2.0 M solution in  $\text{Et}_2\text{O}$ , 12.8 mL, 25.6 mmol) dropwise by syringe over one minute. The reaction was allowed to stir for 15 minutes at  $0^\circ\text{C}$  and then quenched by the addition of aqueous potassium hydroxide (10% w/v, 13 mL) and stirred for an additional 5 minutes. The mixture was then diluted with  $\text{H}_2\text{O}$  (50 mL), and extracted with  $\text{EtOAc}$  (3 x 50 mL). The organic layers were then combined, dried over  $\text{Na}_2\text{SO}_4$ , filtered, and concentrated in vacuo to isolate a bright red foam. Column chromatography (2% MeOH in  $\text{CH}_2\text{Cl}_2$ ) afforded a red foam of adequate purity for the next step.  $^1\text{H}$  NMR (500 MHz,  $\text{CDCl}_3$ ):  $\delta$  6.99 (dd,  $J = 9.7, 0.5$  Hz, 1H), 6.89 (d,  $J = 3.17$  Hz, 1H), 6.74 (d,  $J = 8.3$  Hz, 1H), 6.59 (d,  $J = 8.1, 2.2$  Hz, 1H), 6.55 (d,  $J = 2.0$  Hz, 1H), 6.18 (dd,  $J = 9.9, 1.6$  Hz, 1H), 5.91 (d,  $J = 1.5$  Hz, 1H), 5.49 (dd,  $J = 3.3, 0.6$  Hz, 1H), 4.08 – 4.04 (m, 2H), 3.81 (s, 3H), 3.05 (s, 1H), 2.42 – 2.31 (m, 2H), 2.11 – 1.99 (m, 2H), 1.19 – 1.16 (m, 2H), 0.08 (s, 9H);  $^{13}\text{C}$  NMR (126 MHz,  $\text{CDCl}_3$ ):  $\delta$  184.8, 174.5, 153.3, 148.3, 148.0, 140.1, 132.8, 131.2, 120.0, 113.6, 111.7, 110.0, 99.7, 72.7, 66.4, 56.0, 45.7, 31.6, 29.1, 17.9,  $-1.4$ ; IR (NaCl/thin film): 2951, 2916, 1631, 1569, 1514, 1424, 1248, 1157, 1137, 1108, 108, 1050, 1032, 859, 837, 649; HRMS (EI+) calc'd for  $\text{C}_{23}\text{H}_{31}\text{NO}_3\text{Si}$   $[\text{M}+\text{H}]^+$  398.2146, found 398.2149;  $[\alpha]_{\text{D}}^{25}$ :  $-1185$  ( $c$  0.22,  $\text{CH}_2\text{Cl}_2$ ).

### Preparation of Amine 26

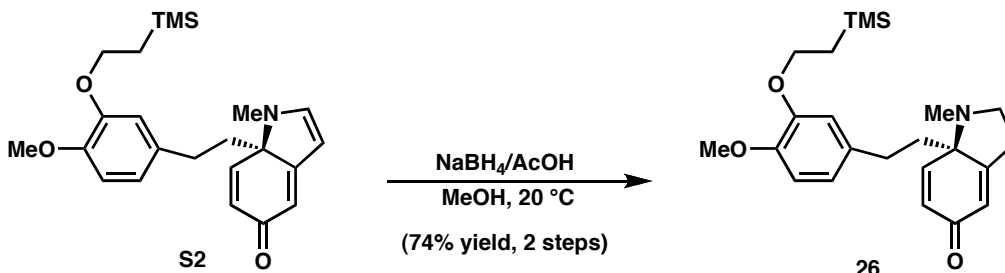

To a solution of enamine S2 in MeOH (26 mL) at  $23^\circ\text{C}$  was added a solution of  $\text{NaBH}_4$  (97 mg, 2.56 mmol) in AcOH (9.8 mL), dropwise by syringe. The solution was stirred at  $20^\circ\text{C}$  for 1 hour, then a second portion of  $\text{NaBH}_4$  (97 mg, 2.56 mmol) in AcOH (9.8 mL) was added and stirring continued for one additional hour. The reaction was cooled to  $0^\circ\text{C}$  in an ice/water

bath and neutralized by the slow addition of aqueous potassium hydroxide (30% w/v, 65 mL). The solution was then diluted with H<sub>2</sub>O (50 mL) and extracted with EtOAc (3 x 100 mL) and the organic layers combined, then dried over Na<sub>2</sub>SO<sub>4</sub>, filtered, concentrated, and purified by flash chromatography (2% MeOH in CH<sub>2</sub>Cl<sub>2</sub>) afforded amine **26** as a yellow oil (379 mg, 0.948 mmol, 77% yield over two steps). <sup>1</sup>H NMR (500 MHz, CDCl<sub>3</sub>): δ 6.98 (d, *J* = 10.0 Hz, 1H), 6.76 (d, *J* = 8.1 Hz, 1H), 6.61 (dd, *J* = 8.1, 2.0 Hz, 1H), 6.56 (d, *J* = 1.7 Hz, 1H), 6.34 (dd, *J* = 10.0, 1.5 Hz, 1H), 6.20 (app d, *J* = 1.7 Hz, 1H), 4.10 – 4.05 (m, 2H), 3.82 (s, 3H), 3.18 (ddd, *J* = 10.5, 8.5, 4.2 Hz, 1H), 3.05 (td, *J* = 10.0, 7.0 Hz, 1H), 2.79 – 2.68 (m, 2H), 2.42 (s, 3H), 2.36 (ddd, *J* = 13.9, 10.7, 6.4 Hz, 1H), 2.22 (ddd, *J* = 14.0, 10.9, 6.5 Hz, 1H), 1.90 – 1.81 (m, 2H), 1.22 – 1.17 (m, 2H), 0.08 (s, 9H); <sup>13</sup>C NMR (126 MHz, CDCl<sub>3</sub>): δ 186.7, 167.0, 148.2, 147.9, 146.0, 133.5, 130.2, 123.3, 119.8, 113.4, 111.6, 66.6, 66.3, 56.0, 51.6, 36.5, 32.0, 29.6, 27.8, 17.9, – 1.4; IR (NaCl/thin film): 2949, 2850, 1669, 1644, 1606, 1589, 1514, 1442, 1424, 1305, 1253, 1234, 1176, 1150, 1137, 1032, 1013, 942, 890, 859, 839, 695; HRMS (EI+) calc'd for C<sub>23</sub>H<sub>33</sub>NO<sub>3</sub>Si [M+H]<sup>+</sup> 400.2302, found 400.2283;

### Preparation of Bromopropellane **30**

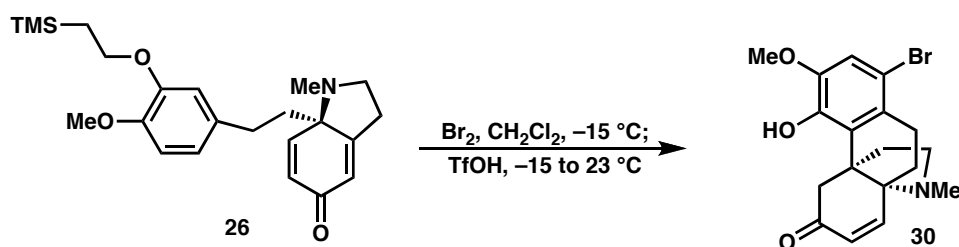

To a solution of amine **26** (414 mg, 1.04 mmol, 1.0 equiv) in CH<sub>2</sub>Cl<sub>2</sub> (21 mL) at –15 °C (ice/NaCl) was added bromine (80 μL, 1.55 mmol, 1.5 equiv) dropwise by syringe. The solution was stirred for 20 minutes, then trifluoromethanesulfonic acid (550 μL, 6.22 mmol, 6.0 equiv) was added dropwise by syringe and the solution was warmed to room temperature (23 °C). After 12 minutes, the reaction was quenched by the slow dropwise addition of saturated aqueous sodium bicarbonate (50 mL) and the reaction diluted with CH<sub>2</sub>Cl<sub>2</sub> (60 mL) and washed with aqueous sodium bicarbonate (2 x 100 mL). The aqueous layers were then back extracted with CH<sub>2</sub>Cl<sub>2</sub> (1 x 100 mL), the organic layers combined, dried over Na<sub>2</sub>SO<sub>4</sub>, filtered, and concentrated in vacuo to afford a light brown foam. Flash chromatography (20 to 30% EtOAc in hexanes) afforded propellane **30** as an off-white amorphous solid (302 mg, 0.798 mmol, 77% yield). <sup>1</sup>H NMR (500 MHz, CDCl<sub>3</sub>): δ 6.98 (s, 1H), 6.82 (d, *J* = 10.3 Hz, 1H), 6.15 (dd, *J* = 10.4, 1.1 Hz, 1H), 5.95 (s, 1H), 3.86 (s, 3H), 3.62 (dd, *J* = 16.6, 1.2 Hz, 1H), 2.89 – 2.81 (m, 2H), 2.69 – 2.55 (m, 2H), 2.44 (s, 3H), 2.41 – 2.36 (m, 1H), 2.04 – 1.96 (m, 2H), 1.77 – 1.69 (m, 1H); <sup>13</sup>C NMR (126 MHz, CDCl<sub>3</sub>): δ 199.3, 149.7, 145.4, 143.2, 130.8, 130.2, 127.4, 114.0, 112.9, 63.2, 56.4, 51.6, 48.0, 43.8, 33.4, 33.2, 25.8, 24.8; IR (NaCl/thin film): 3338, 2926, 2850, 2790, 1673, 1601, 1470, 1436, 1420, 1388, 1357, 1314, 1314, 1276, 1235, 1125, 1064, 1038, 879, 785. HRMS (EI+) calc'd for C<sub>18</sub>H<sub>20</sub>BrNO<sub>3</sub> [M+H]<sup>+</sup> 378.0699, found 378.0683. [α]<sub>D</sub><sup>25</sup>: –226 (*c* 0.42, CH<sub>2</sub>Cl<sub>2</sub>).

### Preparation of Epoxyketone **31**

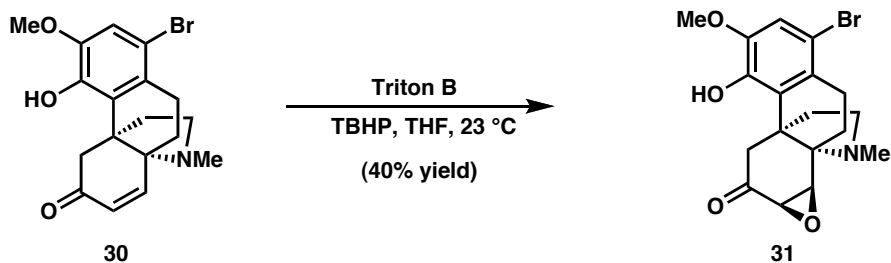

To a solution of enone **30** (13.3 mg, 0.035 mmol, 1.0 equiv) in THF (0.70 mL) at 28 °C was added *tert*-butylhydroperoxide (100  $\mu$ L of a 5.5M solution, 0.550 mmol, 16.0 equiv.) and Triton B (0.05 mL of a 40% solution in methanol, 105  $\mu$ mmol, 3.0 equiv) dropwise by syringe, and the solution stirred for 16 hours at 28 °C. The reaction was then quenched by the addition of a solution of saturated aqueous  $\text{Na}_2\text{S}_2\text{O}_3$  (2 mL) and stirred for an additional 30 minutes.  $\text{H}_2\text{O}$  (10 mL) was then added, the solution extracted with  $\text{CH}_2\text{Cl}_2$  (3 x 15 mL), and the organic layers combined, dried over  $\text{Na}_2\text{SO}_4$ , filtered, and concentrated in vacuo to afford a clear oil. Flash chromatography (1 to 2% MeOH in  $\text{CH}_2\text{Cl}_2$ ) on Florisil afforded epoxyketone **31** as a white foam (5.3 mg, 0.014 mmol, 40% yield).  $^1\text{H}$  NMR (500 MHz,  $\text{CDCl}_3$ ):  $\delta$  6.97 (s, 1H), 5.93 (s, 1H), 3.84 (s, 3H), 3.51 (d,  $J = 3.91$  Hz, 1H), 3.29 (dd,  $J = 3.91, 1.0$  Hz, 1H), 3.21 (dd,  $J = 14.2, 1.0$  Hz, 1H), 2.95 – 2.81 (m, 2H), 2.74 – 2.64 (m, 1H), 2.67 (d,  $J = 13.9$  Hz, 1H), 2.58 (ddd,  $J = 16.6, 11.8, 6.3$  Hz, 1H), 2.51 (s, 3H), 2.42 (ddd,  $J = 14.4, 9.3, 6.8$  Hz), 2.20 – 2.09 (m, 2H), 2.06 – 1.96 (m, 1H);  $^{13}\text{C}$  NMR (126 MHz,  $\text{CDCl}_3$ ):  $\delta$  207.4, 145.3, 142.8, 130.3, 127.8, 113.9, 113.0, 60.7, 59.2, 56.4, 55.6, 51.8, 51.4, 40.3, 34.0, 33.3, 25.7, 23.2; IR (NaCl/thin film): 3420, 2937, 2791, 1717, 1603, 1470, 1436, 1356, 1313, 1277, 1238, 876  $\text{cm}^{-1}$ ; HRMS (EI+) calc'd for  $\text{C}_{18}\text{H}_{20}\text{BrNO}_4$   $[\text{M}+\text{H}]^+$  394.0648, found 394.0632;  $[\alpha]_D^{25}$ : – 11 ( $c$  0.24,  $\text{CH}_2\text{Cl}_2$ ).

Longer epoxidation times and additional equivalents of Triton B resulted in higher overall conversion, but resulted in an oxidative rearrangement of the desired epoxide into an unidentified lactone side product:  $^1\text{H}$  NMR (300 MHz,  $\text{CDCl}_3$ ): 6.99 (s, 1H), 4.44 (d,  $J = 1.9$  Hz, 1H), 3.83 (s, 3H), 3.04 – 2.83 (m, 5H), 2.83 – 2.64 (m, 3H), 2.36 (s, 3H), 2.20 (ddd,  $J = 18.4, 12.7, 4.0$  Hz, 3H), 2.04 – 1.80 (m, 3H);  $^{13}\text{C}$  NMR (126 MHz,  $\text{CDCl}_3$ ):  $\delta$  176.4, 145.2, 142.1, 130.1, 127.1, 115.0, 114.0, 85.0, 80.4, 73.9, 56.3, 55.6, 54.4, 41.9, 34.2, 27.3, 23.7; IR (NaCl/thin film): 3351, 2930, 2849, 2791, 1784, 1605, 1470, 1434, 1292, 1274; HRMS (EI+) calc'd for  $\text{C}_{18}\text{H}_{20}\text{BrNO}_5$   $[\text{M}+\text{H}]^+$  410.0598, found 410.0599.

### Preparation of Hemiaminal **33**

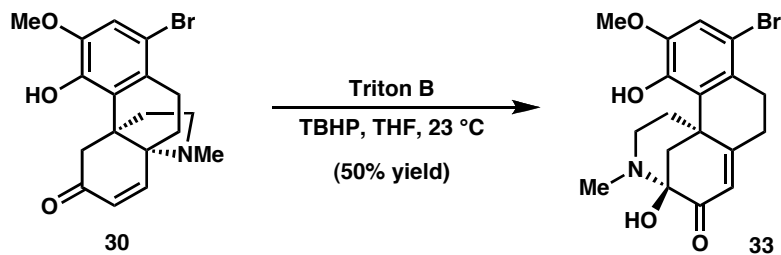

To a solution of enone **30** (105.5 mg, 0.279 mmol, 1.0 equiv) in THF (5.6 mL) at 23 °C was added *tert*-butylhydroperoxide (1.01 mL of a 5.5M solution in decane, 5.58 mmol, 20.0

equiv) and Triton B (0.64 mL of a 40% solution in methanol, 1.40 mmol, 5.0 equiv) dropwise by syringe, and the solution stirred for 18.5 hours at room temperature (23 °C). The reaction was then quenched by the addition of saturated aqueous Na<sub>2</sub>S<sub>2</sub>O<sub>3</sub> (10 mL) and saturated ammonium chloride (5 mL), then stirred for an additional 30 minutes. H<sub>2</sub>O (15 mL) was then added, the solution extracted with CH<sub>2</sub>Cl<sub>2</sub> (3 x 30 mL), and the organic layers were combined, dried over Na<sub>2</sub>SO<sub>4</sub>, filtered, and concentrated in vacuo to afford a clear oil. The oil was then redissolved in CH<sub>2</sub>Cl<sub>2</sub> (2 mL) and concentrated onto dry SiO<sub>2</sub> and allowed to sit for 2 hours. Flash chromatography (1 to 4% MeOH in CH<sub>2</sub>Cl<sub>2</sub>) afforded hemiaminal **33** as a light yellow foam (55.2 mg, 0.140, 50% yield). <sup>1</sup>H NMR (500 MHz, CDCl<sub>3</sub>): δ 7.01 (s, 1H), 6.19 (br s, 1H), 6.16 (d, *J* = 1.3 Hz, 1H), 4.17 (br s, 1H), 3.88 (s, 3H), 3.42 (d, *J* = 12.7 Hz, 1H), 3.36 (td, *J* = 13.2, 5.6 Hz, 1H), 3.28 – 3.21 (m, 1H), 3.01 (ddd, *J* = 12.2, 5.5, 1.4 Hz, 1H), 2.65 – 2.53 (m, 2H), 2.52 – 2.43 (m, 2H), 2.21 (s, 3H), 1.91 (dd, *J* = 12.7, 2.7 Hz, 1H), 1.42 (dddd, *J* = 13.5, 4.1, 2.6, 1.5 Hz, 1H); <sup>13</sup>C NMR (126 MHz, CDCl<sub>3</sub>): δ 194.8, 167.6, 145.9, 144.1, 128.4, 127.2, 123.8, 113.7, 113.6, 83.2, 77.3, 77.0, 76.8, 56.4, 49.1, 44.8, 42.0, 36.1, 31.7, 31.1, 29.1; IR (NaCl/thin film): 3447, 2929, 2841, 1665, 1599, 1471, 1436, 1275, 1234, 1179, 1-83, 1035, 885; HRMS (EI+) calc'd for C<sub>18</sub>H<sub>20</sub>BrNO<sub>4</sub> [M+H]<sup>+</sup> 394.0648, found 330.0649; [α]<sub>D</sub><sup>25</sup> = -179 (*c* 0.79, CH<sub>2</sub>Cl<sub>2</sub>).

### Preparation of Dihydrocepharatine A (S3)

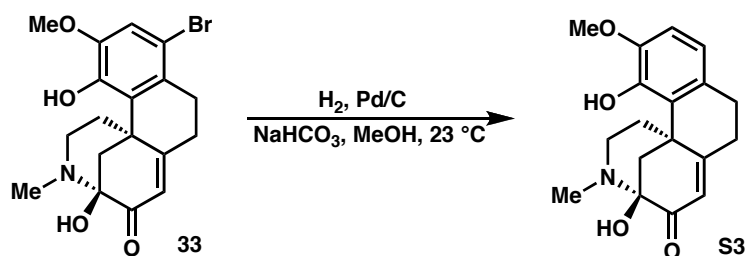

To a solution of bromohemiaminal **33** (32.8 mg, 0.083 mmol, 1.0 equiv) in MeOH (0.83 mL) at 23 °C was added sodium bicarbonate (42 mg, 0.50 mmol, 6.0 equiv) and Pd/C (3.2 mg of 10 wt% palladium on activated carbon). The solution was then placed under an atmosphere of hydrogen and the solution stirred for 1.5 hours at room temperature (23 °C). The reaction was then diluted with EtOAc, filtered through a plug of Celite, and concentrated in vacuo to isolate a yellow oil. Flash chromatography (1 to 4% MeOH in CH<sub>2</sub>Cl<sub>2</sub>) afforded hemiaminal **S3** as a white foam (20.8 mg, 0.066 mmol, 80% yield). <sup>1</sup>H NMR (500 MHz, CDCl<sub>3</sub>): δ 6.73 (d, *J* = 8.3 Hz, 1H), 6.61 (app d, *J* = 8.3 Hz, 1H), 6.19 (br s, 1H), 6.15 (d, *J* = 1.2 Hz, 1H), 4.18 (br s, 1H), 3.88 (s, 2H), 3.44 (d, *J* = 12.7 Hz, 1H), 3.34 (td, *J* = 13.2, 5.6 Hz, 1H), 3.01 (ddd, *J* = 12.2, 5.5, 1.4 Hz, 1H), 2.97 – 2.90 (m, 1H), 2.61 – 2.42 (m, 3H), 2.22 (s, 3H), 1.99 (dd, *J* = 12.7, 2.7 Hz, 1H), 1.41 (dddd, *J* = 13.5, 4.1, 2.7, 1.6 Hz, 1H); <sup>13</sup>C NMR (126 MHz, CDCl<sub>3</sub>) δ 195.1, 168.7, 145.6, 144.5, 129.4, 125.5, 124.0, 119.3, 109.1, 83.3, 77.3, 77.0, 76.8, 56.2, 49.2, 44.5, 42.2, 36.1, 31.7, 31.1, 29.3; IR (NaCl/thin film): 3469, 2934, 2842, 2801, 1664, 1484, 1440, 1277, 1234, 1189, 1079, 965; HRMS (EI+) calc'd for C<sub>18</sub>H<sub>21</sub>NO<sub>4</sub> [M+H]<sup>+</sup> 316.1543, found 316.1541; [α]<sub>D</sub><sup>25</sup> = -284 (*c* 0.21, CH<sub>2</sub>Cl<sub>2</sub>).

### Preparation of Cepharatine A (7)

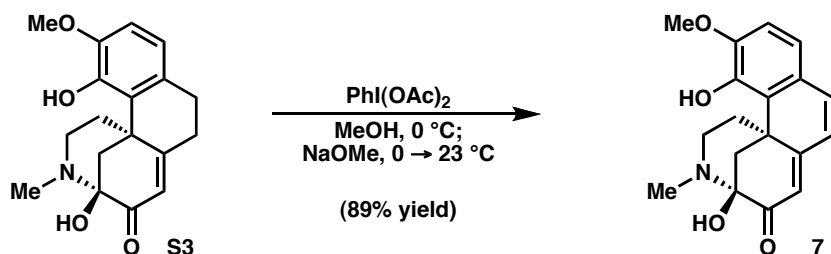

To a solution of hemiaminal **S3** (14.1 mg, 44.8  $\mu\text{mol}$ , 1.0 equiv) in MeOH (0.89 mL) at 0  $^\circ\text{C}$  was added a solution of iodobenzene diacetate (15.1 mg, 47  $\mu\text{mol}$ , 1.05 equiv) dropwise by syringe. The solution was stirred for 20 minutes, a solution of sodium methoxide (0.5 M in MeOH, 0.224 mmol, 5.0 equiv) was added dropwise to afford a bright orange solution. After 5 minutes, the reaction was warmed to room temperature and stirred for 20 minutes, then quenched with saturated aqueous ammonium chloride (5 mL), then diluted with H<sub>2</sub>O and extracted with EtOAc (3 x 5 mL). The organic layers were combined, dried over Na<sub>2</sub>SO<sub>4</sub>, and concentrated in vacuo to afford a yellow-orange oil. Flash chromatography on silica gel (deactivated with 0.5% Et<sub>3</sub>N, 1 to 3% MeOH in CH<sub>2</sub>Cl<sub>2</sub> eluent) afforded cephartine A (12.5 mg, 40.0  $\mu\text{mol}$ , 89% yield) as a yellow-orange foam. <sup>1</sup>H NMR (500 MHz, CDCl<sub>3</sub>):  $\delta$  6.78 (d,  $J$  = 8.3 Hz, 1H), 6.76 (d,  $J$  = 8.3 Hz, 1H), 6.70 (d,  $J$  = 9.3 Hz, 1H), 6.29 (d,  $J$  = 9.3 Hz, 1H), 6.28 (br s, 1H), 6.12 (s, 1H), 4.29 (br s, 1H), 3.93 (s, 3H), 3.91 (d,  $J$  = 13.0 Hz, 1H), 2.91 – 2.84 (m, 1H), 2.74 – 2.58 (m, 2H), 2.24 (s, 3H), 2.22 (dd,  $J$  = 13.0 Hz, 1H), 1.38 (ddd,  $J$  = 6.1, 4.7, 2.2 Hz, 1H); <sup>13</sup>C NMR (126 MHz, CDCl<sub>3</sub>):  $\delta$  194.1, 161.4, 148.1, 144.4, 136.0, 125.6, 125.5, 124.1, 123.4, 121.3, 108.7, 83.2, 56.2, 46.6, 44.4, 43.5, 36.2, 31.2; IR (NaCl/thin film): 3447, 2929, 2839, 1648, 1609, 1563, 1483, 1440, 1273, 1239, 1192, 1272, 1075, 969 cm<sup>-1</sup>; HRMS (EI+) calc'd for C<sub>18</sub>H<sub>19</sub>NO<sub>4</sub> [M+H]<sup>+</sup> 314.1387, found 314.1393; [ $\alpha$ ]<sub>D</sub><sup>15</sup> = -537 ( $c$  0.38, CHCl<sub>3</sub>).

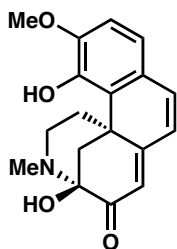

(-)-Cephartine A

### Comparison of Spectroscopic Data for Natural<sup>3</sup> and Synthetic (-)-Cephartine A

<sup>1</sup>H NMR Data (both spectra are referenced to 7.27 ppm)

| Reported <sup>3</sup>      | Synthetic                            |
|----------------------------|--------------------------------------|
| 6.79 (d, $J$ = 8.4 Hz, 1H) | $\delta$ 6.79 (d, $J$ = 8.2 Hz, 1H), |
| 6.77 (d, $J$ = 8.4 Hz, 1H) | 6.77 (d, $J$ = 8.2 Hz, 1H)           |
| 6.71 (d, $J$ = 9.6 Hz, 1H) | 6.71 (d, $J$ = 9.3 Hz, 1H)           |
| 6.29 (d, $J$ = 9.6 Hz, 1H) | 6.30 (d, $J$ = 9.4 Hz, 1H)           |
| -                          | 6.29 (br s, 1H)                      |
| 6.13 (s, 1H)               | 6.13 (s, 1H)                         |
| 4.32 (br s, 1H)            | 4.30 (br s, 1H)                      |

3.94 (s, 3H)  
 3.95 (d,  $J = 12.8$  Hz, 1H)  
 2.90 (m, 1H)  
 2.74 (m, 1H)  
 2.66 (m, 1H)  
 2.25  
 2.19 (m, 1H)  
 1.40 (m, 1H)

3.94 (s, 3H)  
 3.92 (d,  $J = 13.0$  Hz, 1H)  
 2.92 – 2.85 (m, 1H)  
 2.75 – 2.59 (m, 2H)  
 -  
 2.25 (s, 3H)  
 2.23 (dd,  $J = 13.0, 2.7$  Hz, 1H),  
 1.38 (ddd,  $J = 6.1, 4.7, 2.2$  Hz, 1H)

**$^{13}\text{C}$  NMR Comparison Data (both spectra are referenced to 77.0 ppm)**

| Reported | Synthetic |
|----------|-----------|
| 194.0    | 194.1     |
| 161.6    | 161.4     |
| 148.1    | 148.1     |
| 144.4    | 144.4     |
| 136.1    | 136.0     |
| 125.5    | 125.6     |
| 125.4    | 125.5     |
| 124.0    | 124.1     |
| 123.3    | 123.4     |
| 121.2    | 121.3     |
| 108.7    | 108.7     |
| 83.2     | 83.2      |
| 56.1     | 56.2      |
| 46.6     | 46.6      |
| 44.3     | 44.4      |
| 43.4     | 43.5      |
| 36.2     | 36.2      |
| 31.1     | 31.2      |

**Optical Rotation**

**Natural**  
 $[\alpha]_{\text{D}}^{15} = -716$  ( $c$  0.98,  $\text{CHCl}_3$ )

**Synthetic**  
 $[\alpha]_{\text{D}}^{15} = -537$  ( $c$  0.38,  $\text{CHCl}_3$ )\*

**Preparation of Cepharatine C (XX)**

\* It was noted that synthetic (–)-cepharatine A produced a lower specific rotation than that reported. It is inferred, based on the total syntheses of 8-demethoxyrunanine and cepharatine D, that the lower observed rotation does not necessarily imply any loss of enantiomeric excess (see above).

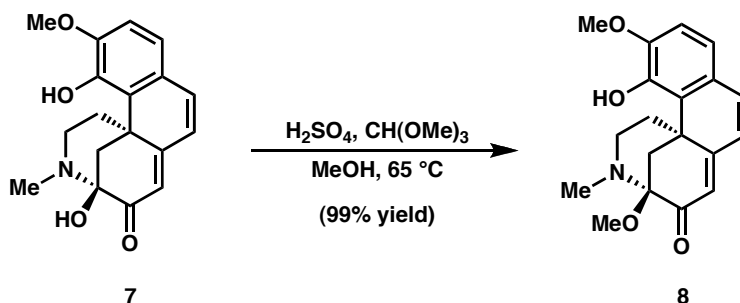

To a solution of cepharatine A (7.5 mg, 23.0  $\mu\text{mol}$  mmol, 1.0 equiv) in MeOH (0.46 mL) was added trimethyl orthoformate (0.05 mL) and sulfuric acid (0.050 mL of a 1M solution in methanol). The solution was then stirred for 1 hour at 65  $^\circ\text{C}$ , cooled to room temperature, then slowly quenched with saturated aqueous sodium bicarbonate (3 mL) and extracted with EtOAc (4 x 3 mL). The organic layers were then combined, dried over  $\text{Na}_2\text{SO}_4$ , and concentrated in vacuo to isolate a yellow oil. Flash chromatography (0.5 to 4% MeOH in  $\text{CH}_2\text{Cl}_2$ ) afforded cepharatine C (**8**) as a yellow-orange foam (7.4 mg, 22.6  $\mu\text{mol}$ , 99% yield).

$^1\text{H}$  NMR (500 MHz,  $\text{CDCl}_3$ )  $\delta$  6.78 (d,  $J = 8.2$  Hz, 1H), 6.76 (d,  $J = 8.2$  Hz, 1H), 6.65 (d,  $J = 9.3$  Hz, 1H), 6.26 (t,  $J = 4.7$  Hz, 1H), 6.26 (s, 1H), 6.07 (s, 1H), 3.94 (d,  $J = 12.5$  Hz, 1H), 3.94 (s, 3H), 3.38 (s, 3H), 2.90 – 2.81 (m, 1H), 2.64 – 2.53 (m, 1H), 2.20 (s, 1H), 2.15 (dd,  $J = 12.4, 2.6$  Hz, 1H), 1.44 – 1.34 (m, 1H).  $^{13}\text{C}$  NMR (126 MHz,  $\text{CDCl}_3$ ):  $\delta$  191.7, 158.0, 147.8, 144.2, 135.0, 126.7, 125.9, 125.5, 123.6, 121.1, 108.7, 87.4, 56.2, 48.6, 46.6, 43.7, 38.8, 36.6, 31.3;  $^1\text{H}$  NMR (300 MHz, methanol- $d_4$ ):  $\delta$  6.88 (d,  $J = 8.4$  Hz, 1H), 6.79 (d,  $J = 8.2$  Hz, 1H), 6.76 (d,  $J = 9.4$  Hz, 1H), 6.30 (d,  $J = 9.5$  Hz, 1H), 6.02 (s, 1H), 4.14 (d,  $J = 12.5$  Hz, 1H), 3.89 (s, 3H), 3.31 (s, 3H), 2.83 (ddd,  $J = 11.7, 4.8, 1.6$  Hz, 1H), 2.66 (td,  $J = 12.8, 4.8$  Hz, 1H), 2.51 (ddd,  $J = 12.9, 11.6, 3.4$  Hz, 1H), 2.10 (s, 3H), 2.02 (dd,  $J = 12.5, 1.3$  Hz, 1H), 1.34 – 1.27 (m, 1H);  $^{13}\text{C}$  NMR (126 MHz, methanol- $d_4$ ):  $\delta$  193.4, 162.6, 150.8, 146.4, 137.9, 126.8, 126.7, 126.5, 123.7, 122.6, 110.5, 88.9, 56.6, 47.7, 45.4, 40.2, 36.9, 32.0; IR (NaCl/thin film): 3338, 2923, 2849, 1658, 1612, 1566, 1483, 1440, 1296, 1274, 1083, 1022, 878  $\text{cm}^{-1}$ ; HRMS (EI+) calc'd for  $\text{C}_{19}\text{H}_{21}\text{NO}_4$   $[\text{M}+\text{H}]^+$  328.1543, found 330.1546;  $[\alpha]_D^{16} = -550$  ( $c$  0.38, MeOH).

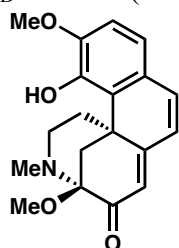

(-)-Cepharatine C

### Comparison of Spectroscopic Data for Natural<sup>3</sup> and Synthetic (-)-Cepharatine C

$^1\text{H}$  NMR Data (both spectra are referenced to 3.30 ppm)

| Reported <sup>3</sup>      | Synthetic                  |
|----------------------------|----------------------------|
| 6.88 (d, $J = 8.4$ Hz, 1H) | 6.88 (d, $J = 8.4$ Hz, 1H) |
| 6.80 (d, $J = 9.2$ Hz, 1H) | 6.79 (d, $J = 8.2$ Hz, 1H) |
| 6.77 (d, $J = 8.4$ Hz, 1H) | 6.76 (d, $J = 9.4$ Hz, 1H) |
| 6.30 (d, $J = 9.2$ Hz, 1H) | 6.30 (d, $J = 9.5$ Hz, 1H) |

6.03 (s, 1H)  
 4.14 (d,  $J = 12.4$  Hz, 1H)  
 3.90 (s, 3H)  
 3.31 (s, 3H)  
 2.85 (m, 1H)  
 2.69 (m, 1H)  
 2.55 (m, 1H)  
 2.10 (s, 3H)  
 2.02 (m, 1H)  
 1.29 (m, 1H)

6.02 (s, 1H)  
 4.14 (d,  $J = 12.5$  Hz, 1H)  
 3.89 (s, 3H)  
 3.31 (s, 3H)  
 2.83 (ddd,  $J = 11.7, 4.8, 1.6$  Hz, 1H)  
 2.66 (td,  $J = 12.8, 4.8$  Hz, 1H)  
 2.51 (ddd,  $J = 12.9, 11.6, 3.4$  Hz, 1H)  
 2.10 (s, 3H)  
 2.02 (dd,  $J = 12.5, 1.3$  Hz, 1H)  
 1.34 – 1.27 (m, 1H)

**$^{13}\text{C}$  NMR Comparison Data (both spectra are referenced to 49.0 ppm)**

**Reported**

$\delta$  193.6  
 162.7  
 150.8  
 146.5  
 137.9  
 126.8  
 126.7  
 126.4  
 123.7  
 122.6  
 110.4  
 88.8  
 56.6  
 49.0  
 47.7  
 45.4  
 40.1  
 36.9  
 32.0

**Synthetic**

$\delta$  193.5  
 162.6  
 150.8  
 146.5  
 137.9  
 126.8  
 126.7  
 126.5  
 123.7  
 122.6  
 110.5  
 88.9  
 56.6  
 $-^{10}$   
 47.7  
 45.4  
 40.2  
 36.9  
 32.0

**Optical Rotation**

**Natural**

$[\alpha]_{\text{D}}^{20} = -332$  ( $c$  1.01, MeOH)

**Synthetic**

$[\alpha]_{\text{D}}^{15} = -550$  ( $c$  0.56, MeOH)

<sup>10</sup> The corresponding resonance is obscured by the residual solvent peak. Acquisition in  $\text{CDCl}_3$  shows the analogous signal at  $\delta$  48.6 ppm.



### III. Crystallographic Information Data for

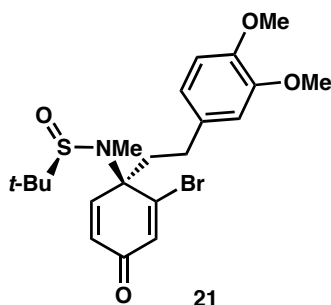

By Michael W. Day (e-mail: [mikeday@caltech.edu](mailto:mikeday@caltech.edu))

#### Contents

Table 1. Crystal data

Figures Minimum overlap

Table 2. Atomic Coordinates

Table 3. Full bond distances and angles

Table 4. Anisotropic displacement parameters

Table 5. Hydrogen atomic coordinates

Table 6. Observed and calculated structure factors (available upon request)

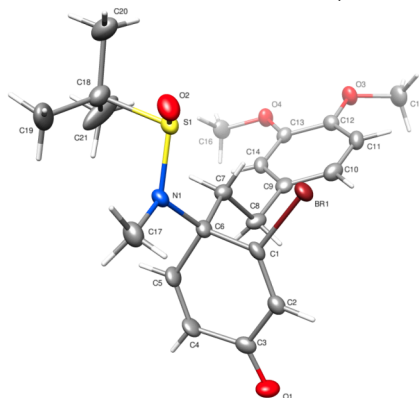

KVC01

**Note:** The crystallographic data have been deposited in the Cambridge Database (CCDC) and has been placed on hold pending further instructions from me. The deposition number is 818651. Ideally the CCDC would like the publication to contain a footnote of the type: "Crystallographic data have been deposited at the CCDC, 12 Union Road, Cambridge CB2 1EZ, UK and copies can be obtained on request, free of charge, by quoting the publication citation and the deposition number 818651."

**Table 1. Crystal data and structure refinement for KVC01 (CCDC 818651).**

|                         |                                                     |
|-------------------------|-----------------------------------------------------|
| Empirical formula       | C <sub>21</sub> H <sub>28</sub> BrNO <sub>4</sub> S |
| Formula weight          | 470.41                                              |
| Crystallization Solvent | Chloroform/pentane                                  |
| Crystal Habit           | Block                                               |
| Crystal size            | 0.23 x 0.20 x 0.19 mm <sup>3</sup>                  |
| Crystal color           | Colorless                                           |

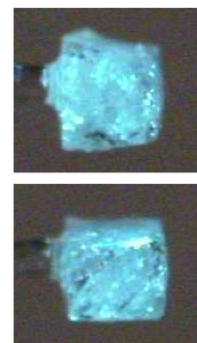

### Data Collection

|                                                                   |                                                                        |                                                                  |
|-------------------------------------------------------------------|------------------------------------------------------------------------|------------------------------------------------------------------|
| Type of diffractometer                                            | Bruker KAPPA APEX II                                                   |                                                                  |
| Wavelength                                                        | 0.71073 Å MoK $\alpha$                                                 |                                                                  |
| Data Collection Temperature                                       | 100(2) K                                                               |                                                                  |
| $\theta$ range for 9986 reflections used in lattice determination | 2.71 to 33.39°                                                         |                                                                  |
| Unit cell dimensions                                              | a = 8.1363(3) Å<br>b = 15.9105(7) Å<br>c = 17.0536(7) Å                | $\alpha = 90^\circ$<br>$\beta = 90^\circ$<br>$\gamma = 90^\circ$ |
| Volume                                                            | 2207.63(16) Å <sup>3</sup>                                             |                                                                  |
| Z                                                                 | 4                                                                      |                                                                  |
| Crystal system                                                    | Orthorhombic                                                           |                                                                  |
| Space group                                                       | P 2 <sub>1</sub> 2 <sub>1</sub> 2 <sub>1</sub>                         |                                                                  |
| Density (calculated)                                              | 1.415 Mg/m <sup>3</sup>                                                |                                                                  |
| F(000)                                                            | 976                                                                    |                                                                  |
| Data collection program                                           | Bruker APEX2 v2009.7-0                                                 |                                                                  |
| $\theta$ range for data collection                                | 2.39 to 34.32°                                                         |                                                                  |
| Completeness to $\theta = 34.32^\circ$                            | 99.8 %                                                                 |                                                                  |
| Index ranges                                                      | -12 $\leq$ h $\leq$ 12, -24 $\leq$ k $\leq$ 25, -27 $\leq$ l $\leq$ 26 |                                                                  |
| Data collection scan type                                         | $\omega$ scans; 7 settings                                             |                                                                  |
| Data reduction program                                            | Bruker SAINT-Plus v7.66A                                               |                                                                  |
| Reflections collected                                             | 42377                                                                  |                                                                  |
| Independent reflections                                           | 9182 [R <sub>int</sub> = 0.0360]                                       |                                                                  |
| Absorption coefficient                                            | 1.982 mm <sup>-1</sup>                                                 |                                                                  |
| Absorption correction                                             | None                                                                   |                                                                  |
| Max. and min. transmission                                        | 0.7045 and 0.6585                                                      |                                                                  |

**Table 1 (cont.)****Structure solution and Refinement**

|                                             |                                                   |
|---------------------------------------------|---------------------------------------------------|
| Structure solution program                  | SHELXS-97 (Sheldrick, 2008)                       |
| Primary solution method                     | Direct methods                                    |
| Secondary solution method                   | Difference Fourier map                            |
| Hydrogen placement                          | Difference Fourier map                            |
| Structure refinement program                | SHELXL-97 (Sheldrick, 2008)                       |
| Refinement method                           | Full matrix least-squares on F <sup>2</sup>       |
| Data / restraints / parameters              | 9182 / 0 / 365                                    |
| Treatment of hydrogen atoms                 | Unrestrained                                      |
| Goodness-of-fit on F <sup>2</sup>           | 1.480                                             |
| Final R indices [I>2σ(I), 7639 reflections] | R1 = 0.0305, wR2 = 0.0353                         |
| R indices (all data)                        | R1 = 0.0403, wR2 = 0.0356                         |
| Type of weighting scheme used               | Sigma                                             |
| Weighting scheme used                       | w=1/σ <sup>2</sup> (F <sub>o</sub> <sup>2</sup> ) |
| Max shift/error                             | 0.005                                             |
| Average shift/error                         | 0.000                                             |
| Absolute structure determination            | Anomalous differences                             |
| Absolute structure parameter                | -0.006(3)                                         |
| Largest diff. peak and hole                 | 2.073 and -0.783 e.Å <sup>-3</sup>                |

**Special Refinement Details**

Crystals were mounted on a glass fiber using Paratone oil then placed on the diffractometer under a nitrogen stream at 100K.

Refinement of F<sup>2</sup> against ALL reflections. The weighted R-factor (wR) and goodness of fit (S) are based on F<sup>2</sup>, conventional R-factors (R) are based on F, with F set to zero for negative F<sup>2</sup>. The threshold expression of F<sup>2</sup> > 2σ(F<sup>2</sup>) is used only for calculating R-factors(gt) etc. and is not relevant to the choice of reflections for refinement. R-factors based on F<sup>2</sup> are statistically about twice as large as those based on F, and R-factors based on ALL data will be even larger.

All esds (except the esd in the dihedral angle between two l.s. planes) are estimated using the full covariance matrix. The cell esds are taken into account individually in the estimation of esds in distances, angles and torsion angles; correlations between esds in cell parameters are only used when they are defined by crystal symmetry. An approximate (isotropic) treatment of cell esds is used for estimating esds involving l.s. planes.

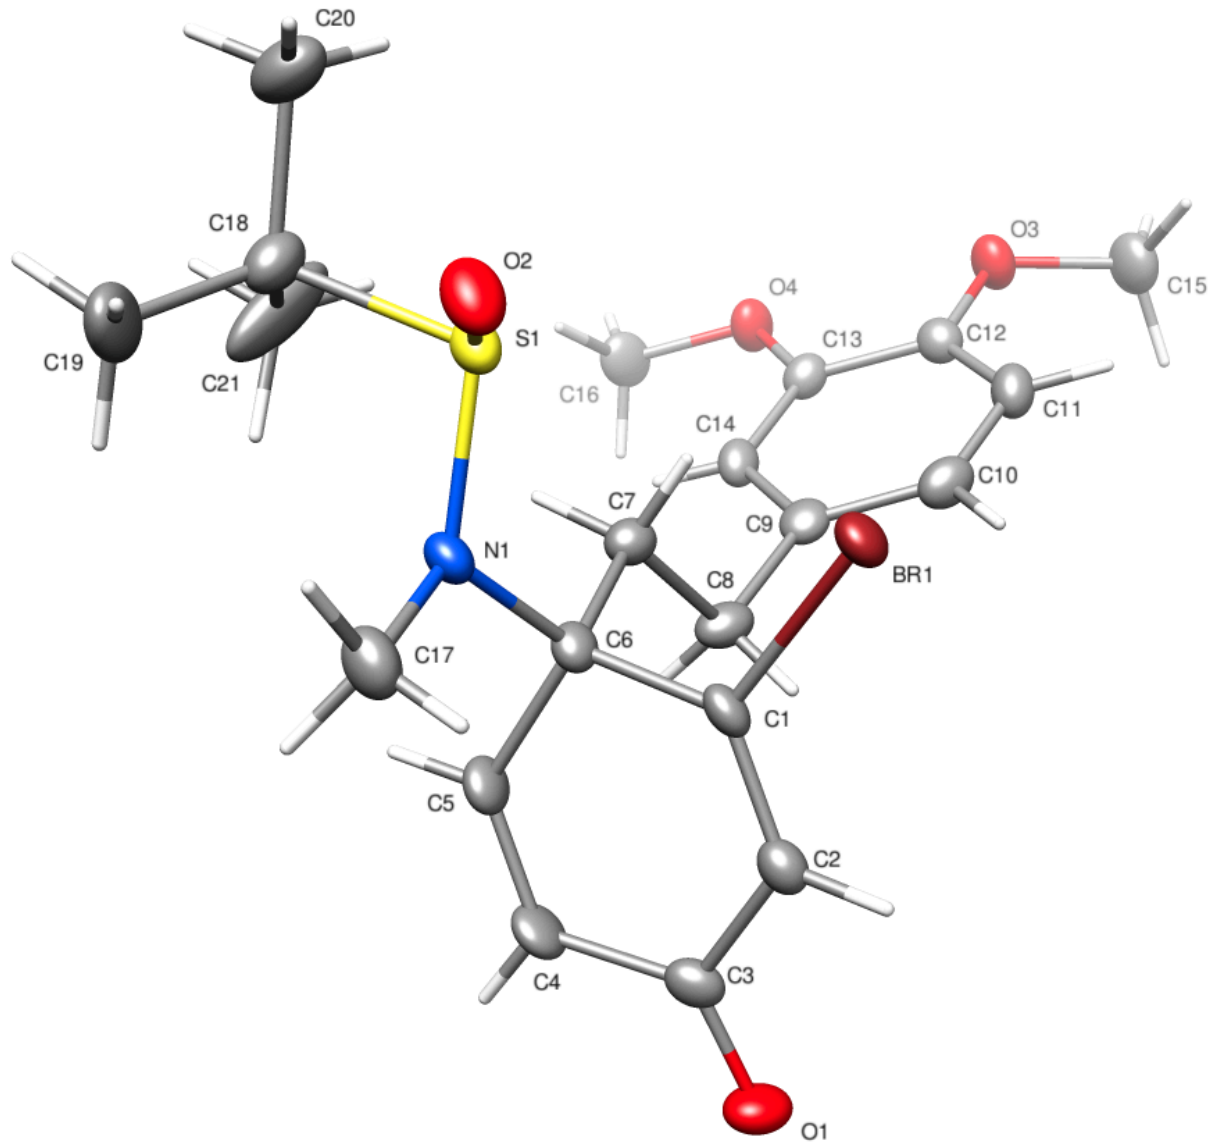

**Table 2. Atomic coordinates ( $\times 10^4$ ) and equivalent isotropic displacement parameters ( $\text{\AA}^2 \times 10^3$ ) for KVC01 (CCDC 818651).  $U(\text{eq})$  is defined as the trace of the orthogonalized  $U_{ij}$  tensor.**

|       | x        | y        | z        | $U_{\text{eq}}$ |
|-------|----------|----------|----------|-----------------|
| Br(1) | 4368(1)  | 11388(1) | -215(1)  | 21(1)           |
| S(1)  | 3998(1)  | 10452(1) | 1554(1)  | 24(1)           |
| O(1)  | 10613(1) | 11690(1) | -578(1)  | 29(1)           |
| O(2)  | 2952(1)  | 11193(1) | 1736(1)  | 31(1)           |
| O(3)  | 4352(1)  | 6754(1)  | -1925(1) | 29(1)           |
| O(4)  | 6122(1)  | 6405(1)  | -694(1)  | 27(1)           |
| N(1)  | 5970(1)  | 10773(1) | 1466(1)  | 21(1)           |
| C(1)  | 6597(1)  | 11226(1) | 85(1)    | 18(1)           |
| C(2)  | 7774(2)  | 11624(1) | -304(1)  | 20(1)           |
| C(3)  | 9522(2)  | 11448(1) | -135(1)  | 21(1)           |
| C(4)  | 9857(2)  | 10950(1) | 566(1)   | 25(1)           |
| C(5)  | 8677(2)  | 10565(1) | 952(1)   | 23(1)           |
| C(6)  | 6879(2)  | 10580(1) | 728(1)   | 19(1)           |
| C(7)  | 6421(2)  | 9700(1)  | 410(1)   | 21(1)           |
| C(8)  | 7473(2)  | 9411(1)  | -284(1)  | 24(1)           |
| C(9)  | 6653(2)  | 8715(1)  | -732(1)  | 22(1)           |
| C(10) | 5680(2)  | 8886(1)  | -1374(1) | 26(1)           |
| C(11) | 4886(2)  | 8252(1)  | -1785(1) | 26(1)           |
| C(12) | 5052(2)  | 7428(1)  | -1548(1) | 23(1)           |
| C(13) | 6021(2)  | 7239(1)  | -888(1)  | 21(1)           |
| C(14) | 6802(2)  | 7879(1)  | -490(1)  | 22(1)           |
| C(15) | 3860(2)  | 6904(1)  | -2722(1) | 38(1)           |
| C(16) | 7104(2)  | 6204(1)  | -32(1)   | 32(1)           |
| C(17) | 6370(2)  | 11599(1) | 1812(1)  | 30(1)           |
| C(18) | 4054(2)  | 9847(1)  | 2481(1)  | 33(1)           |
| C(19) | 4570(3)  | 10396(2) | 3160(1)  | 55(1)           |
| C(20) | 2286(2)  | 9569(2)  | 2594(1)  | 45(1)           |
| C(21) | 5151(3)  | 9094(2)  | 2353(2)  | 72(1)           |

**Table 4. Anisotropic displacement parameters ( $\text{\AA}^2 \times 10^4$ ) for KVC01 (CCDC 818651). The anisotropic displacement factor exponent takes the form:  $-2\pi^2 [ h^2 a^{*2} U^{11} + \dots + 2 h k a^* b^* U^{12} ]$**

|       | $U^{11}$ | $U^{22}$ | $U^{33}$ | $U^{23}$ | $U^{13}$ | $U^{12}$ |
|-------|----------|----------|----------|----------|----------|----------|
| Br(1) | 140(1)   | 282(1)   | 208(1)   | -5(1)    | -40(1)   | 13(1)    |
| S(1)  | 162(2)   | 391(2)   | 169(2)   | -54(2)   | 3(1)     | 7(2)     |
| O(1)  | 202(5)   | 304(6)   | 358(6)   | 21(4)    | 45(5)    | -41(5)   |
| O(2)  | 212(5)   | 480(8)   | 245(6)   | -90(5)   | -10(4)   | 103(5)   |
| O(3)  | 314(5)   | 337(6)   | 232(5)   | -31(4)   | -62(5)   | 0(5)     |
| O(4)  | 317(5)   | 260(5)   | 244(5)   | 24(5)    | -54(4)   | 17(5)    |
| N(1)  | 161(6)   | 291(7)   | 177(6)   | -52(5)   | -22(5)   | -26(5)   |
| C(1)  | 144(5)   | 219(8)   | 173(7)   | -45(6)   | -49(5)   | 13(5)    |
| C(2)  | 190(6)   | 211(8)   | 194(8)   | -33(6)   | -33(6)   | 3(5)     |
| C(3)  | 191(6)   | 179(6)   | 261(7)   | -65(6)   | -1(6)    | -21(6)   |
| C(4)  | 141(7)   | 338(9)   | 270(8)   | -12(7)   | -58(6)   | 14(6)    |
| C(5)  | 179(7)   | 319(9)   | 193(7)   | 11(7)    | -46(6)   | 45(6)    |
| C(6)  | 143(6)   | 272(8)   | 166(7)   | -6(6)    | -5(5)    | 21(6)    |
| C(7)  | 177(7)   | 244(9)   | 217(8)   | 10(6)    | 23(5)    | 3(6)     |
| C(8)  | 197(7)   | 246(9)   | 282(9)   | 20(8)    | 79(7)    | 17(6)    |
| C(9)  | 173(6)   | 282(9)   | 208(7)   | -10(7)   | 68(5)    | 36(6)    |
| C(10) | 250(7)   | 241(8)   | 280(8)   | 45(6)    | 68(7)    | 54(7)    |
| C(11) | 237(7)   | 366(10)  | 189(8)   | 19(7)    | -5(6)    | 62(6)    |
| C(12) | 205(6)   | 281(9)   | 201(7)   | -30(6)   | 19(6)    | 14(6)    |
| C(13) | 220(7)   | 222(8)   | 189(7)   | -5(6)    | 44(6)    | 40(6)    |
| C(14) | 182(7)   | 316(9)   | 174(7)   | 11(6)    | 7(6)     | 55(6)    |
| C(15) | 400(11)  | 481(12)  | 250(9)   | -52(9)   | -68(8)   | -23(9)   |
| C(16) | 353(9)   | 249(11)  | 346(10)  | 59(7)    | -60(7)   | 24(7)    |
| C(17) | 292(9)   | 386(12)  | 228(8)   | -90(8)   | -34(7)   | -9(7)    |
| C(18) | 281(9)   | 478(10)  | 234(8)   | 35(7)    | 62(7)    | -8(7)    |
| C(19) | 523(14)  | 886(18)  | 230(9)   | 147(10)  | -120(9)  | -257(14) |
| C(20) | 435(11)  | 607(15)  | 309(11)  | -75(10)  | 147(9)   | -167(11) |
| C(21) | 768(18)  | 775(19)  | 615(17)  | 442(15)  | 409(14)  | 334(14)  |

**Table 5. Hydrogen coordinates (  $\times 10^4$ ) and isotropic displacement parameters ( $\text{\AA}^2 \times 10^3$ ) for KVC01 (CCDC 818651).**

|        | x         | y         | z        | $U_{\text{iso}}$ |
|--------|-----------|-----------|----------|------------------|
| H(2)   | 7575(15)  | 12016(7)  | -717(7)  | 11(3)            |
| H(4)   | 10891(17) | 10871(8)  | 712(7)   | 20(4)            |
| H(5)   | 8878(15)  | 10213(7)  | 1383(7)  | 21(4)            |
| H(7A)  | 6523(14)  | 9252(8)   | 851(7)   | 15(3)            |
| H(7B)  | 5340(15)  | 9725(7)   | 261(8)   | 17(3)            |
| H(8A)  | 7639(16)  | 9878(8)   | -615(7)  | 19(4)            |
| H(8B)  | 8477(15)  | 9260(7)   | -87(7)   | 19(4)            |
| H(10)  | 5587(18)  | 9428(7)   | -1546(7) | 25(4)            |
| H(11)  | 4253(16)  | 8356(7)   | -2226(7) | 13(3)            |
| H(14)  | 7354(15)  | 7769(7)   | -93(7)   | 7(3)             |
| H(15A) | 2756(18)  | 7284(8)   | -2747(8) | 29(4)            |
| H(15B) | 3592(16)  | 6324(9)   | -2932(8) | 28(4)            |
| H(15C) | 4870(20)  | 7153(9)   | -3037(8) | 44(5)            |
| H(16A) | 8250(17)  | 6406(8)   | -134(8)  | 35(4)            |
| H(16B) | 6996(16)  | 5643(9)   | 27(8)    | 25(4)            |
| H(16C) | 6649(15)  | 6483(8)   | 472(8)   | 19(4)            |
| H(17A) | 7408(19)  | 11605(8)  | 2081(9)  | 35(4)            |
| H(17B) | 5560(20)  | 11759(9)  | 2176(9)  | 56(5)            |
| H(17C) | 6400(20)  | 12014(10) | 1427(10) | 50(6)            |
| H(19A) | 4400(20)  | 10072(9)  | 3615(9)  | 46(5)            |
| H(19B) | 3940(30)  | 10951(12) | 3173(11) | 85(8)            |
| H(19C) | 5730(30)  | 10510(11) | 3114(10) | 73(6)            |
| H(20A) | 2020(20)  | 9236(10)  | 2169(10) | 50(5)            |
| H(20B) | 1550(20)  | 10082(11) | 2668(10) | 60(6)            |
| H(20C) | 2350(20)  | 9202(10)  | 3050(10) | 43(5)            |
| H(21A) | 6290(20)  | 9451(11)  | 2348(10) | 58(6)            |
| H(21B) | 4890(20)  | 8773(11)  | 1913(11) | 67(8)            |
| H(21C) | 5110(20)  | 8738(11)  | 2781(11) | 69(6)            |

**Table 3. Bond lengths [Å] and angles [°] for KVC01 (CCDC 818651).**

|                  |            |                   |            |
|------------------|------------|-------------------|------------|
| Br(1)-C(1)       | 1.9017(12) | C(1)-C(6)-C(7)    | 108.80(10) |
| S(1)-O(2)        | 1.4881(10) | C(8)-C(7)-C(6)    | 114.05(12) |
| S(1)-N(1)        | 1.6903(11) | C(9)-C(8)-C(7)    | 111.51(11) |
| S(1)-C(18)       | 1.8509(15) | C(10)-C(9)-C(14)  | 118.22(14) |
| O(1)-C(3)        | 1.2281(15) | C(10)-C(9)-C(8)   | 120.94(13) |
| O(3)-C(12)       | 1.3741(15) | C(14)-C(9)-C(8)   | 120.79(13) |
| O(3)-C(15)       | 1.4369(17) | C(9)-C(10)-C(11)  | 121.64(13) |
| O(4)-C(13)       | 1.3702(16) | C(12)-C(11)-C(10) | 119.88(14) |
| O(4)-C(16)       | 1.4191(16) | O(3)-C(12)-C(11)  | 124.40(13) |
| N(1)-C(17)       | 1.4765(18) | O(3)-C(12)-C(13)  | 116.05(12) |
| N(1)-C(6)        | 1.4918(16) | C(11)-C(12)-C(13) | 119.54(13) |
| C(1)-C(2)        | 1.3254(18) | O(4)-C(13)-C(14)  | 124.62(12) |
| C(1)-C(6)        | 1.5205(17) | O(4)-C(13)-C(12)  | 115.74(12) |
| C(2)-C(3)        | 1.4782(17) | C(14)-C(13)-C(12) | 119.64(13) |
| C(3)-C(4)        | 1.4596(19) | C(13)-C(14)-C(9)  | 121.08(13) |
| C(4)-C(5)        | 1.3165(19) | C(19)-C(18)-C(21) | 113.9(2)   |
| C(5)-C(6)        | 1.5117(17) | C(19)-C(18)-C(20) | 109.55(15) |
| C(6)-C(7)        | 1.5475(19) | C(21)-C(18)-C(20) | 110.36(17) |
| C(7)-C(8)        | 1.531(2)   | C(19)-C(18)-S(1)  | 111.17(12) |
| C(8)-C(9)        | 1.502(2)   | C(21)-C(18)-S(1)  | 107.67(12) |
| C(9)-C(10)       | 1.3780(19) | C(20)-C(18)-S(1)  | 103.70(12) |
| C(9)-C(14)       | 1.399(2)   |                   |            |
| C(10)-C(11)      | 1.388(2)   |                   |            |
| C(11)-C(12)      | 1.3778(19) |                   |            |
| C(12)-C(13)      | 1.4066(18) |                   |            |
| C(13)-C(14)      | 1.379(2)   |                   |            |
| C(18)-C(19)      | 1.509(2)   |                   |            |
| C(18)-C(21)      | 1.510(3)   |                   |            |
| C(18)-C(20)      | 1.518(2)   |                   |            |
| O(2)-S(1)-N(1)   | 108.73(6)  |                   |            |
| O(2)-S(1)-C(18)  | 104.36(6)  |                   |            |
| N(1)-S(1)-C(18)  | 102.14(6)  |                   |            |
| C(12)-O(3)-C(15) | 115.33(12) |                   |            |
| C(13)-O(4)-C(16) | 116.34(11) |                   |            |
| C(17)-N(1)-C(6)  | 114.27(11) |                   |            |
| C(17)-N(1)-S(1)  | 116.32(10) |                   |            |
| C(6)-N(1)-S(1)   | 118.91(8)  |                   |            |
| C(2)-C(1)-C(6)   | 125.04(12) |                   |            |
| C(2)-C(1)-Br(1)  | 119.32(10) |                   |            |
| C(6)-C(1)-Br(1)  | 115.46(9)  |                   |            |
| C(1)-C(2)-C(3)   | 120.50(13) |                   |            |
| O(1)-C(3)-C(4)   | 122.63(12) |                   |            |
| O(1)-C(3)-C(2)   | 121.08(13) |                   |            |
| C(4)-C(3)-C(2)   | 116.25(12) |                   |            |
| C(5)-C(4)-C(3)   | 121.76(13) |                   |            |
| C(4)-C(5)-C(6)   | 124.86(13) |                   |            |
| N(1)-C(6)-C(5)   | 105.66(10) |                   |            |
| N(1)-C(6)-C(1)   | 113.24(10) |                   |            |
| C(5)-C(6)-C(1)   | 109.88(11) |                   |            |
| N(1)-C(6)-C(7)   | 111.24(11) |                   |            |
| C(5)-C(6)-C(7)   | 107.87(11) |                   |            |



KVC5-205

Sample Name:

KVC5-205

Data Collected on:

indy.caltech.edu-inova500

Archive directory:

/home/kangway/vnmrsys/data

Sample directory:

KVC5-205

FidFile: PROTON01

Pulse Sequence: PROTON (s2pul)

Solvent: cdc13

Data collected on: Sep 21 2010

Temp. 25.0 C / 298.1 K

Sample #33, Operator: kangway

Relax. delay 5.000 sec

Pulse 45.0 degrees

Acq. time 2.500 sec

Width 8000.0 Hz

32 repetitions

OBSERVE H1, 499.7420505 MHz

DATA PROCESSING

Line broadening 0.2 Hz

FT size 65536

Total time 4 min 0 sec

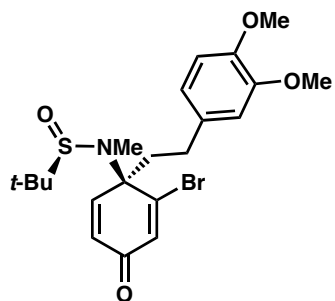

Major Diastereomer  
(*R<sub>S</sub>*, *R*) - 21

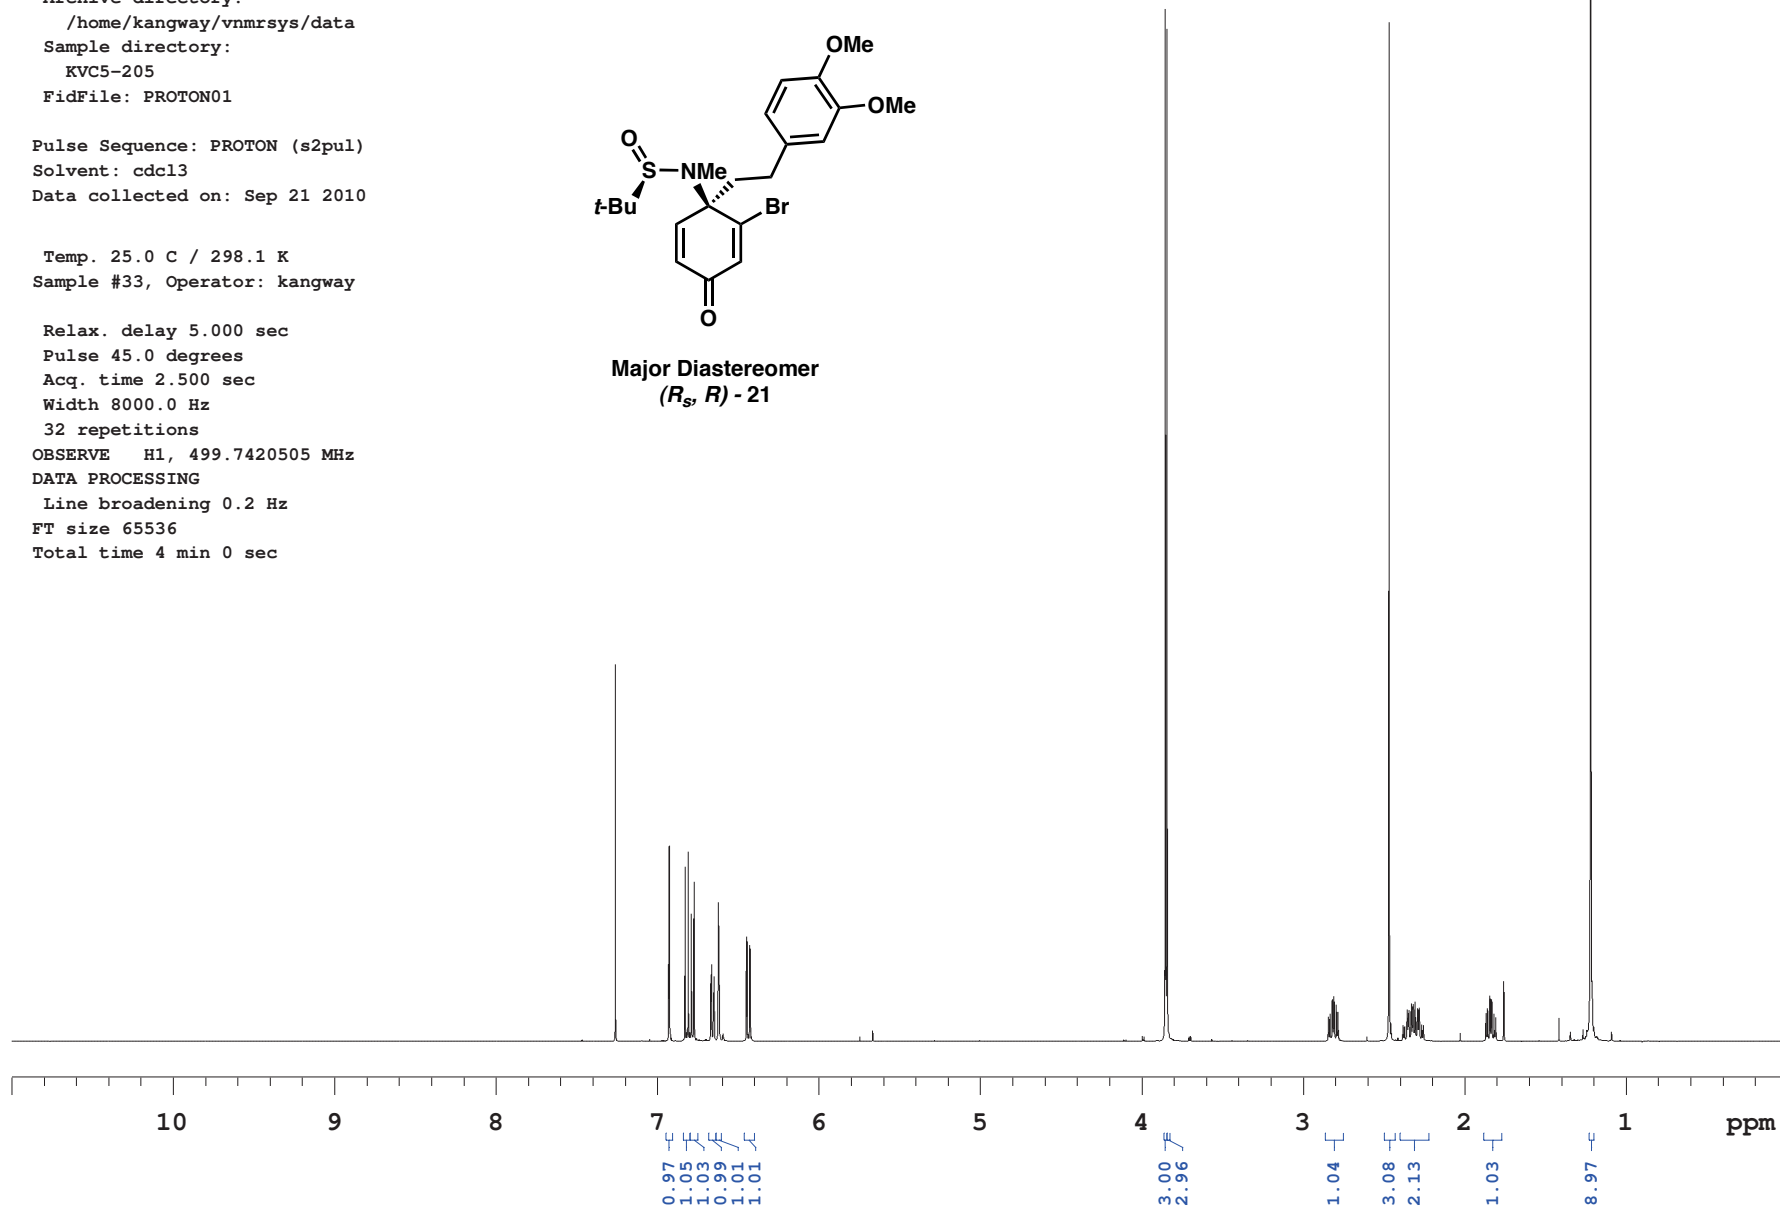

KVC5-205

Sample Name:

KVC5-205

Data Collected on:

indy.caltech.edu-inova500

Archive directory:

/home/kangway/vnmrsys/data

Sample directory:

KVC5-205

FidFile: CARBON01

Pulse Sequence: CARBON (s2pul)

Solvent: cdc13

Data collected on: Sep 21 2010

Temp. 25.0 C / 298.1 K

Sample #33, Operator: kangway

Relax. delay 1.000 sec

Pulse 45.0 degrees

Acq. time 1.042 sec

Width 31446.5 Hz

1000 repetitions

OBSERVE C13, 125.6602442 MHz

DECOUPLE H1, 499.7445450 MHz

Power 39 dB

continuously on

WALTZ-16 modulated

DATA PROCESSING

Line broadening 0.5 Hz

FT size 65536

Total time 34 min

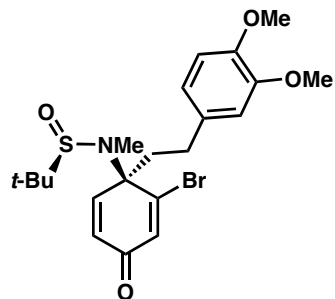

Major Diastereomer  
( $R_S, R$ ) - 21

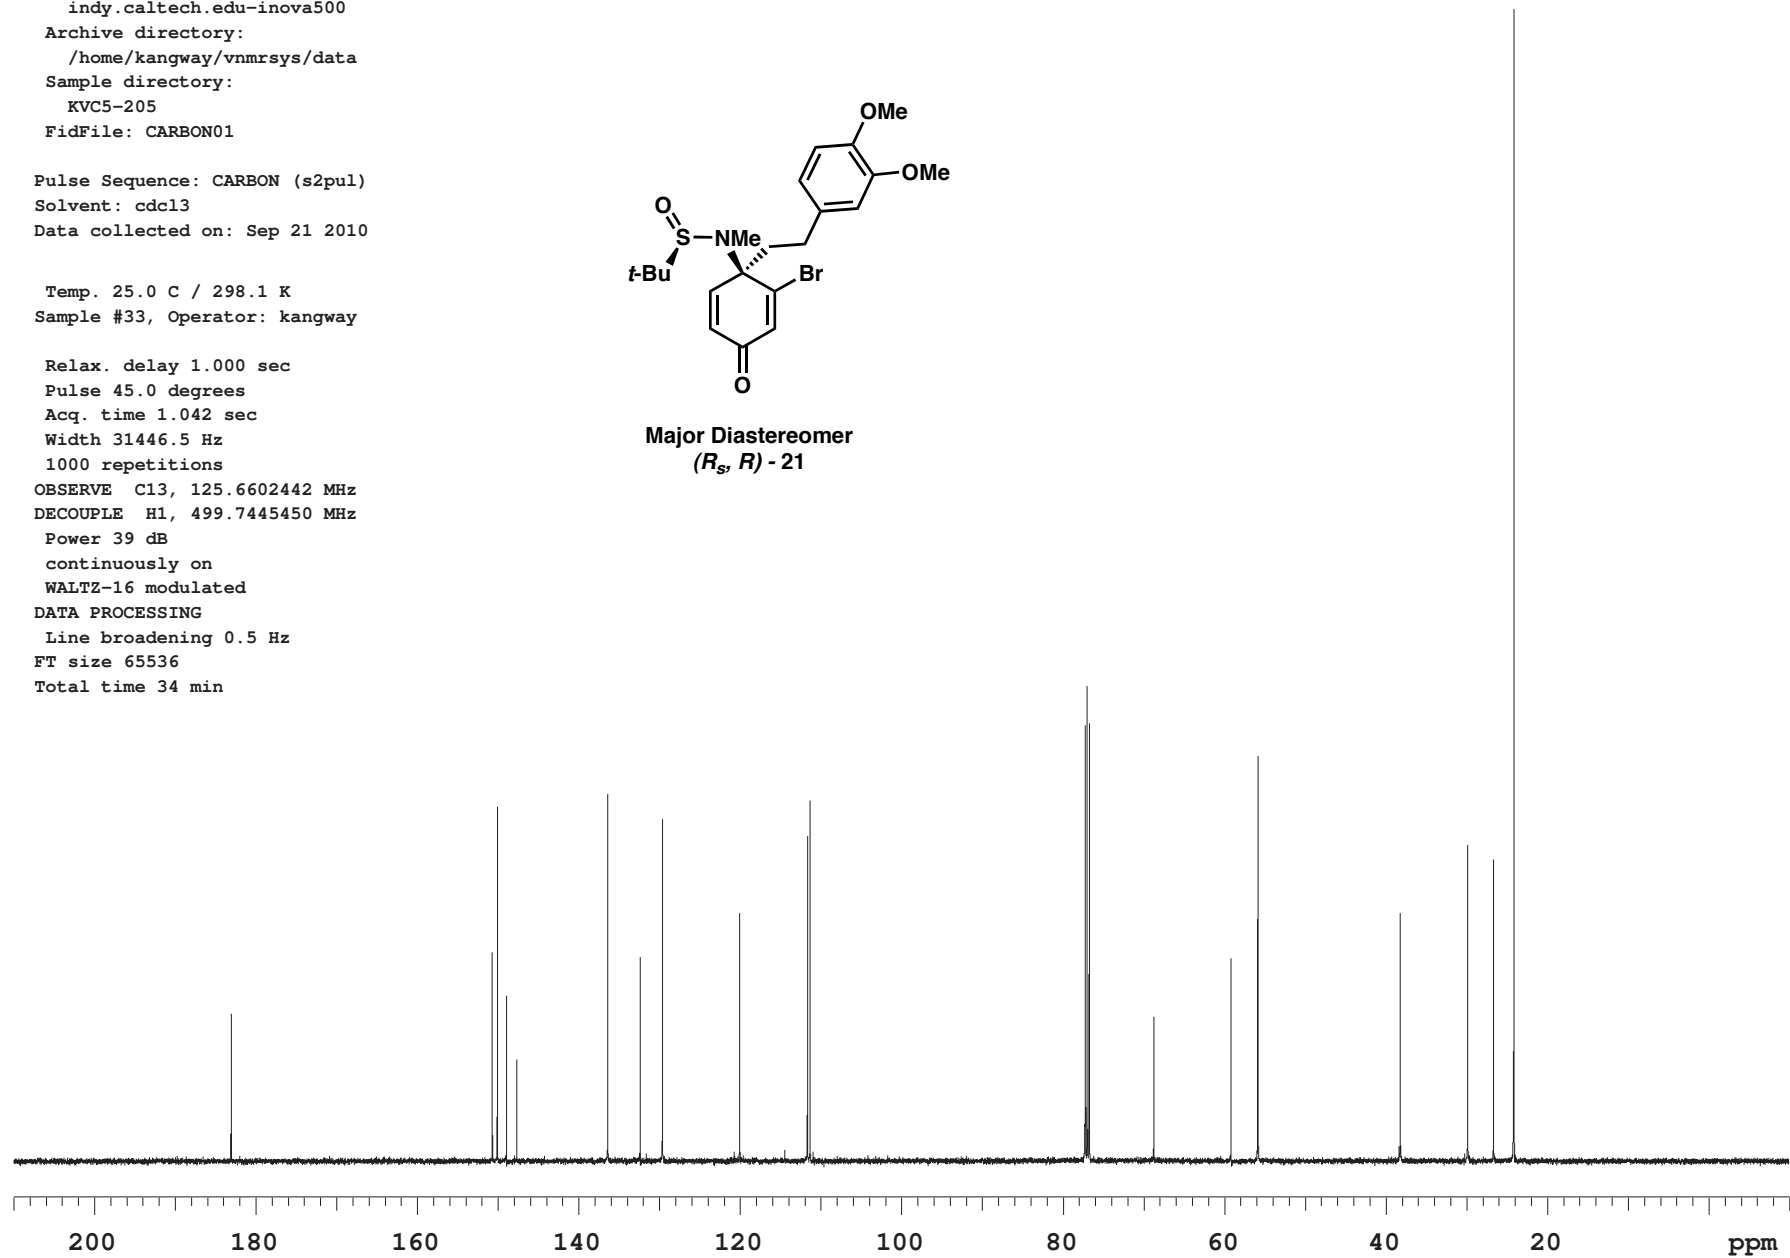

KVC6-061-minor

Sample Name:

KVC6-061-minor

Data Collected on:

indy.caltech.edu-inova500

Archive directory:

/home/kangway/vnmrsys/data

Sample directory:

KVC6-061-minor

FidFile: PROTON06

Pulse Sequence: PROTON (s2pul)

Solvent: cdc13

Data collected on: Oct 31 2010

Temp. 25.0 C / 298.1 K

Sample #39, Operator: kangway

Relax. delay 5.000 sec

Pulse 45.0 degrees

Acq. time 2.500 sec

Width 8000.0 Hz

32 repetitions

OBSERVE H1, 499.7420505 MHz

DATA PROCESSING

FT size 65536

Total time 4 min 0 sec

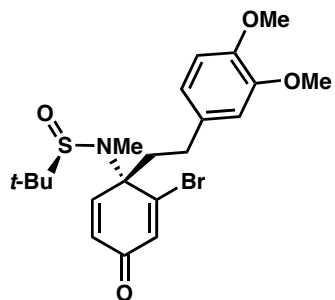

Minor Diastereomer  
(*R,S*)-21

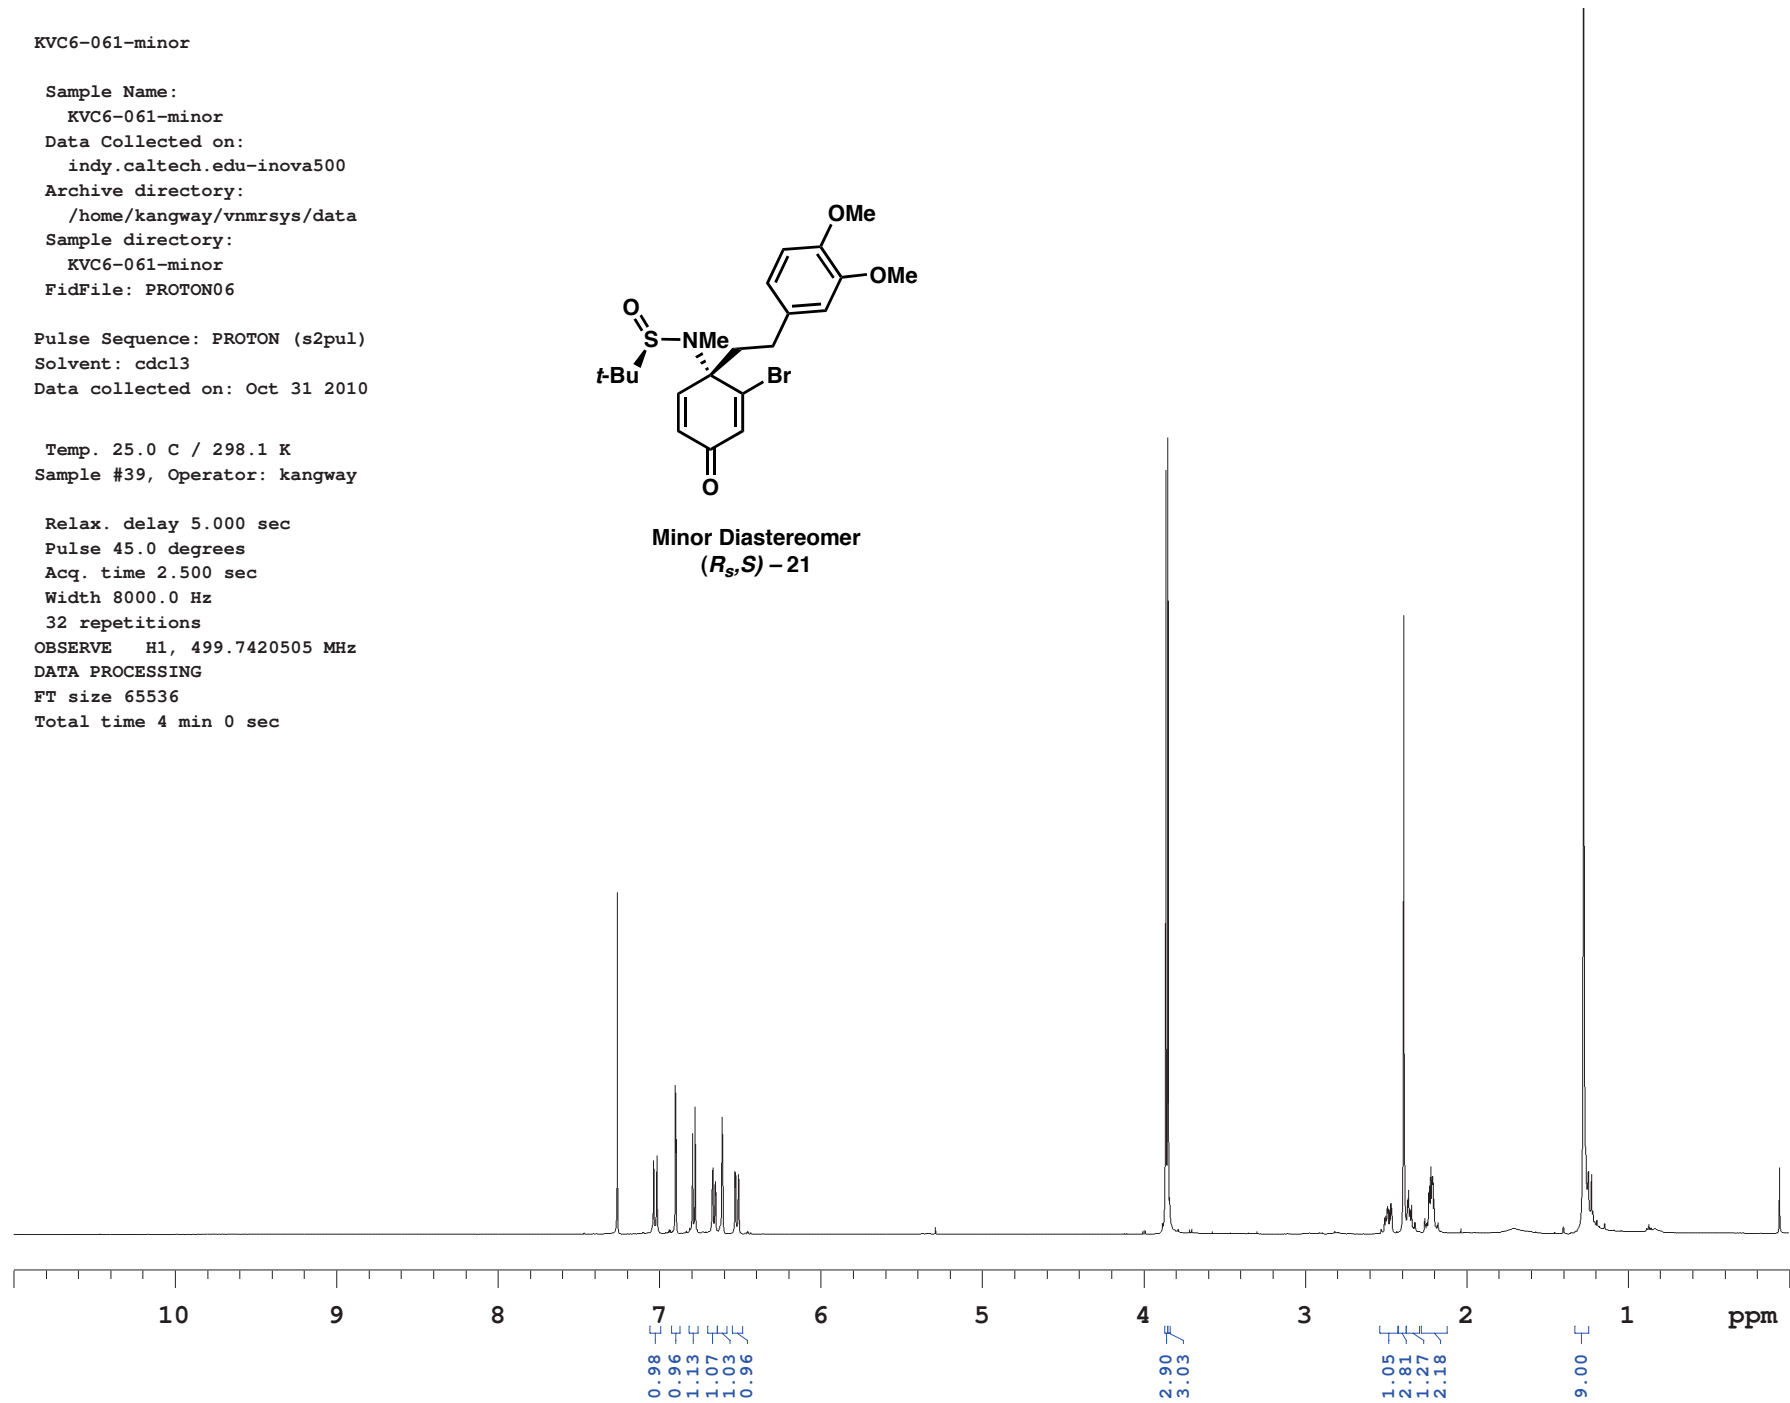

KVC6-061-minor

Sample Name:

KVC6-061-minor

Data Collected on:

indy.caltech.edu-inova500

Archive directory:

/home/kangway/vnmrsys/data

Sample directory:

KVC6-061-minor

FidFile: CARBON03

Pulse Sequence: CARBON (s2pul)

Solvent: cdcl3

Data collected on: Oct 31 2010

Temp. 25.0 C / 298.1 K

Sample #39, Operator: kangway

Relax. delay 1.000 sec

Pulse 45.0 degrees

Acq. time 1.042 sec

Width 31446.5 Hz

1550 repetitions

OBSERVE C13, 125.6602414 MHz

DECOUPLE H1, 499.7445450 MHz

Power 39 dB

continuously on

WALTZ-16 modulated

DATA PROCESSING

Line broadening 0.5 Hz

FT size 65536

Total time 52 min

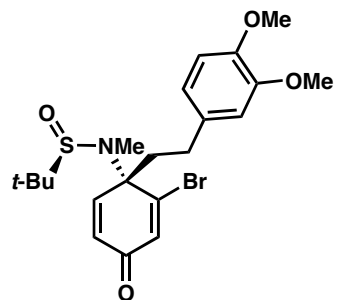

Minor Diastereomer  
(*R,S*) - 21

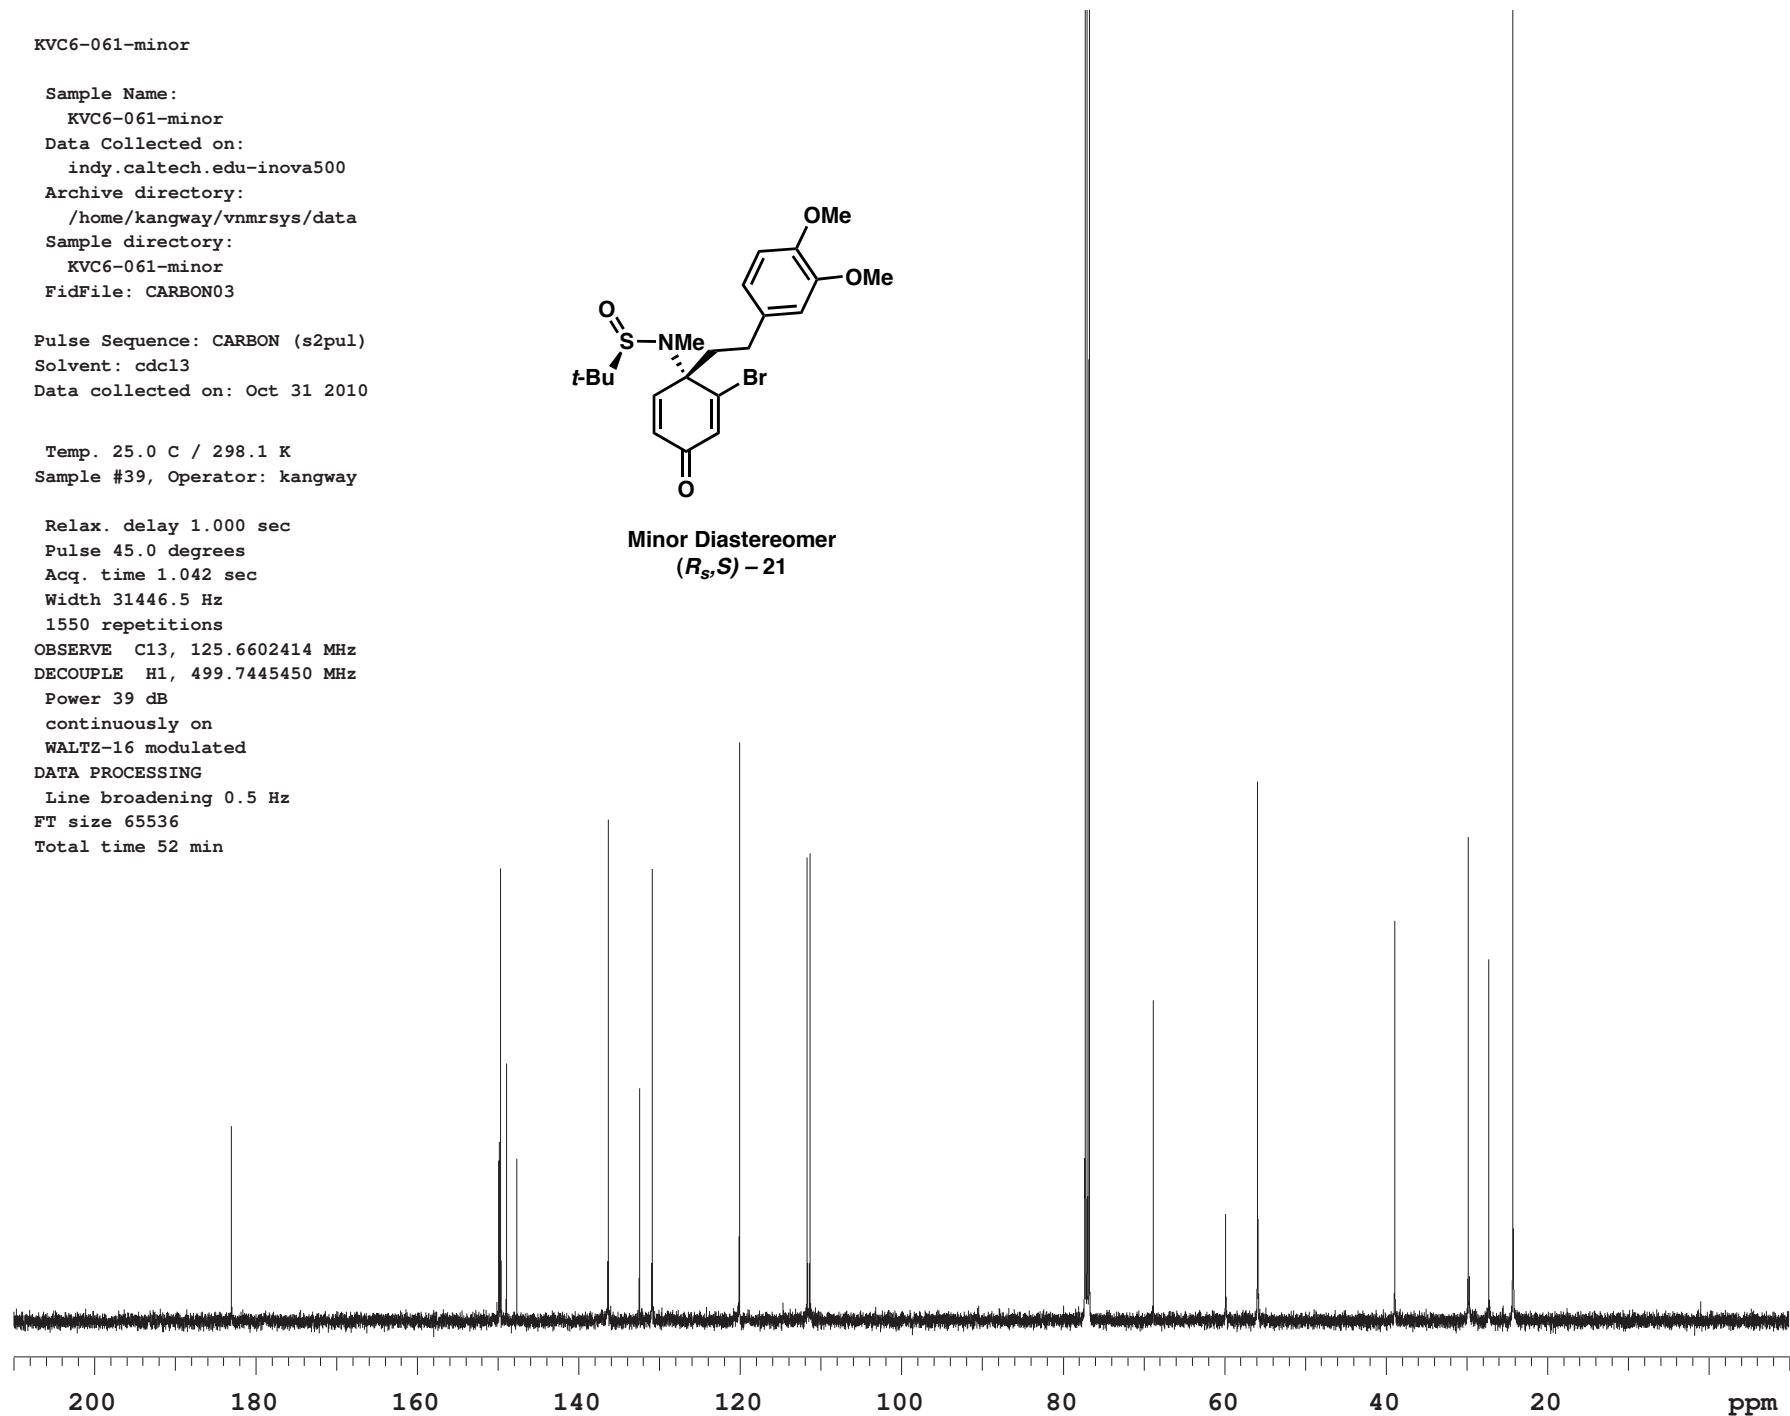

KVC6-067  
Z-Isomer

Sample Name:  
KVC6-067  
Data Collected on:  
indy.caltech.edu-inova500  
Archive directory:  
/home/kangway/vnmrsys/data  
Sample directory:  
KVC6-067  
FidFile: PROTON03

Pulse Sequence: PROTON (s2pul)  
Solvent: cdcl3  
Data collected on: Oct 31 2010

Temp. 25.0 C / 298.1 K  
Sample #41, Operator: kangway

Relax. delay 5.000 sec  
Pulse 45.0 degrees  
Acq. time 2.500 sec  
Width 8000.0 Hz  
32 repetitions  
OBSERVE H1, 499.7420502 MHz  
DATA PROCESSING  
Line broadening 0.2 Hz  
FT size 65536  
Total time 4 min 0 sec

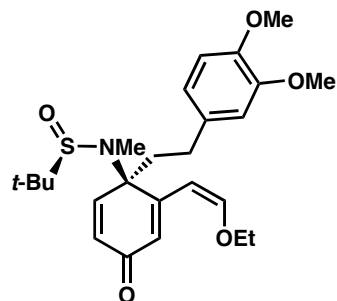

(Z) - 24

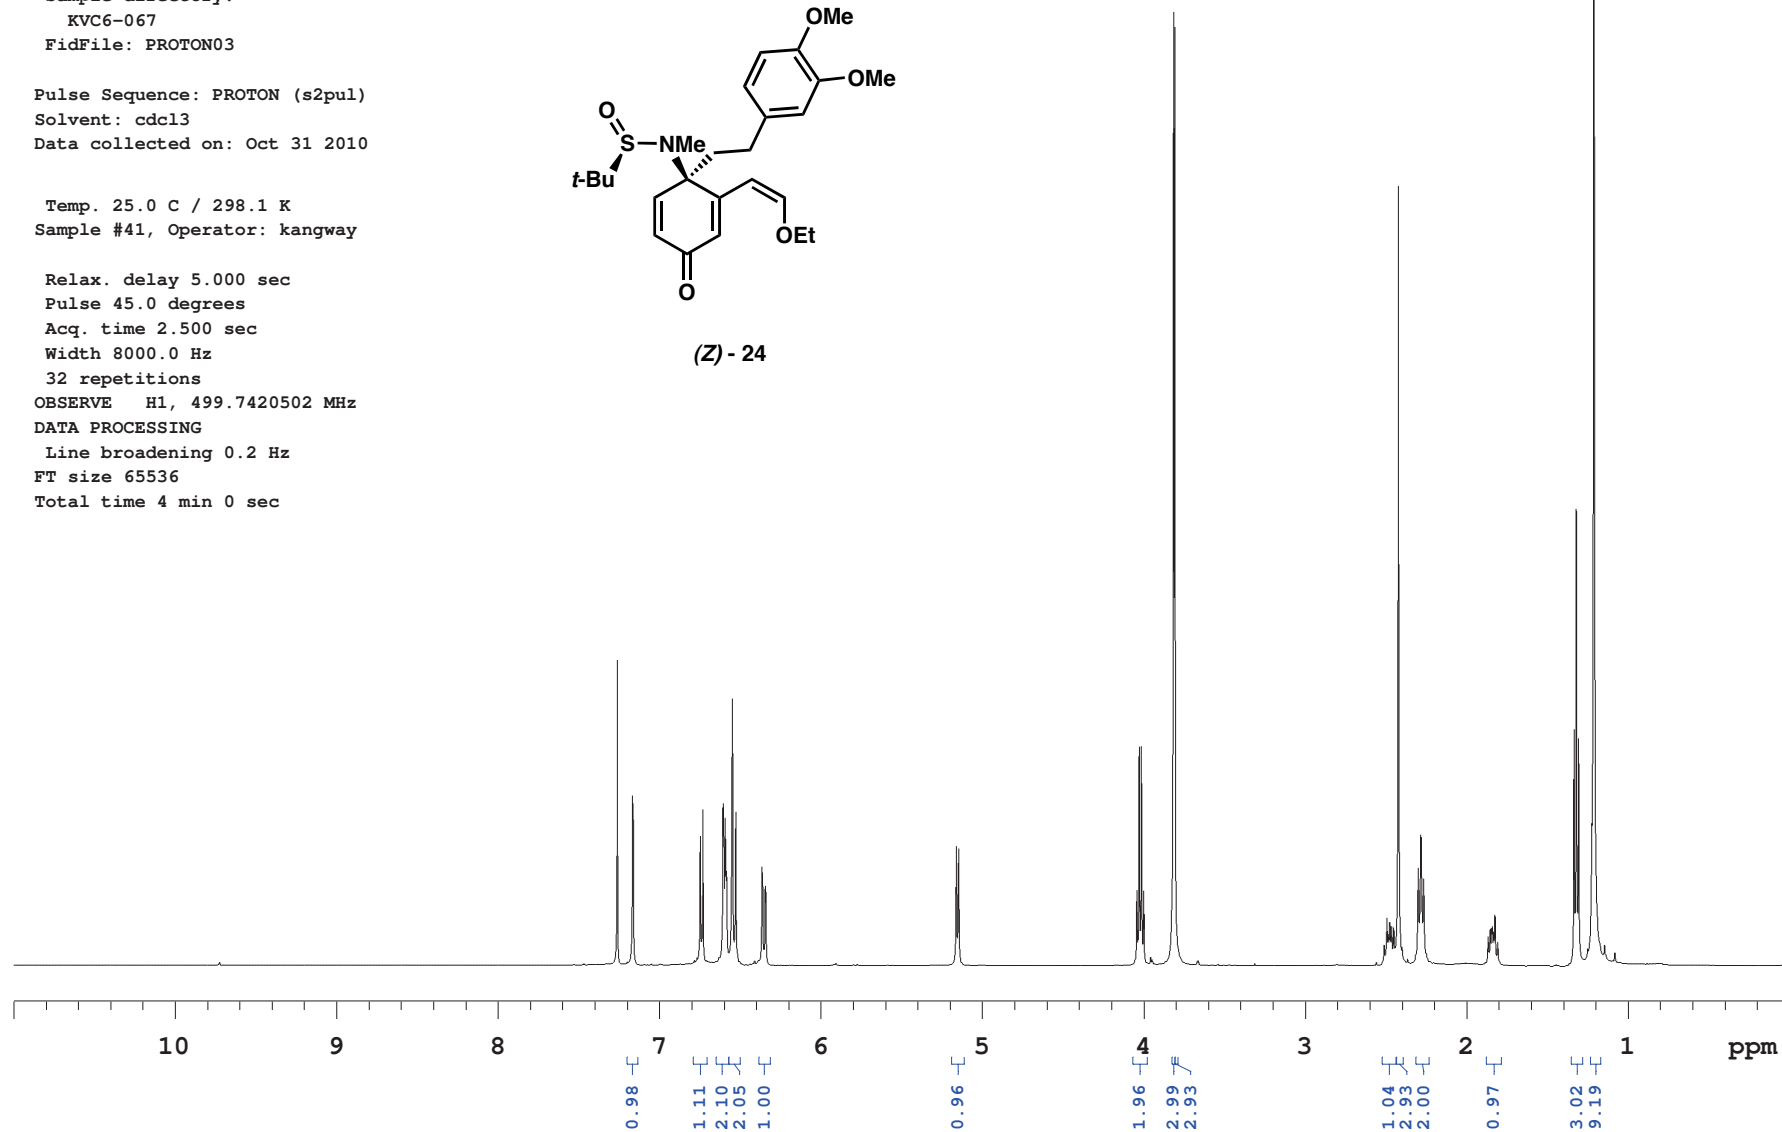

KVC6-067  
Z-Isomer

Sample Name:  
KVC6-067  
Data Collected on:  
indy.caltech.edu-inova500  
Archive directory:  
/home/kangway/vnmrsys/data  
Sample directory:  
KVC6-067  
FidFile: CARBON02

Pulse Sequence: CARBON (s2pul)  
Solvent: cdcl3  
Data collected on: Oct 31 2010

Temp. 25.0 C / 298.1 K  
Sample #41, Operator: kangway

Relax. delay 1.000 sec  
Pulse 45.0 degrees  
Acq. time 1.042 sec  
Width 31446.5 Hz  
1000 repetitions  
OBSERVE C13, 125.6602500 MHz  
DECOUPLE H1, 499.7445450 MHz  
Power 39 dB  
continuously on  
WALTZ-16 modulated  
DATA PROCESSING  
Line broadening 0.5 Hz  
FT size 65536  
Total time 34 min

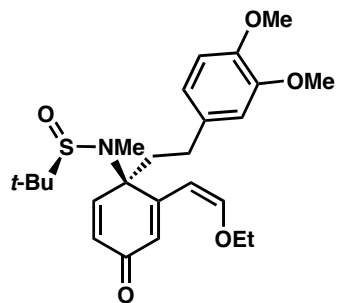

(Z) - 24

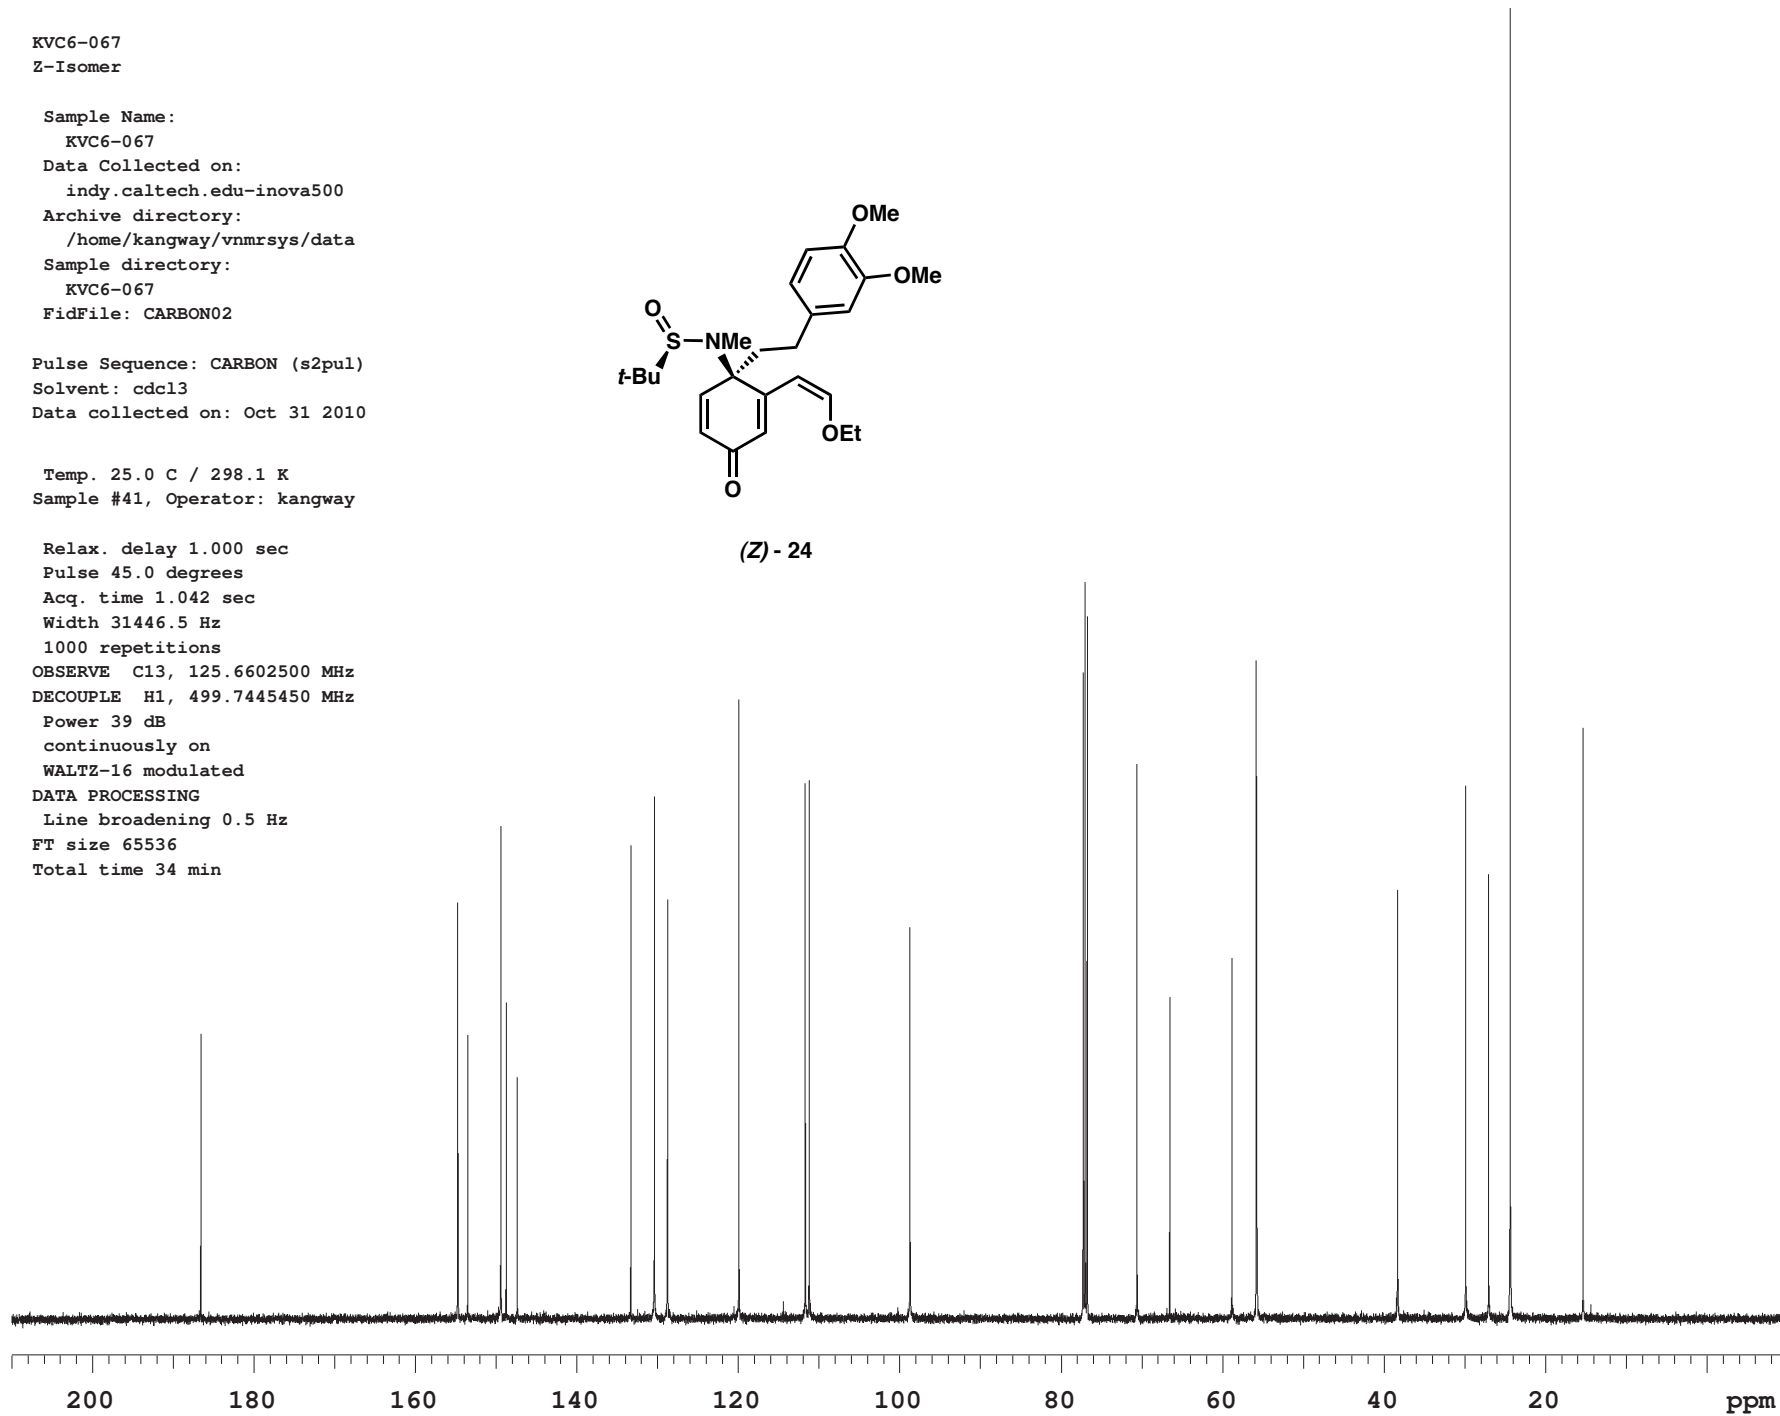

KVC6-067-E

Sample Name:  
KVC6-067-E  
Data Collected on:  
indy.caltech.edu-inova500  
Archive directory:  
/home/kangway/vnmrsys/data  
Sample directory:  
KVC6-067-E  
FidFile: PROTON07

Pulse Sequence: PROTON (s2pul)  
Solvent: cdcl3  
Data collected on: Mar 13 2011

Temp. 25.0 C / 298.1 K  
Sample #41, Operator: kangway

Relax. delay 5.000 sec  
Pulse 45.0 degrees  
Acq. time 2.500 sec  
Width 8000.0 Hz  
32 repetitions  
OBSERVE H1, 499.7290203 MHz  
DATA PROCESSING  
Line broadening 0.2 Hz  
FT size 65536  
Total time 4 min 0 sec

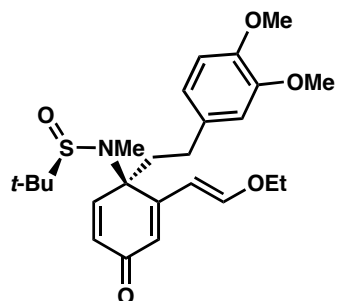

(E) - 24

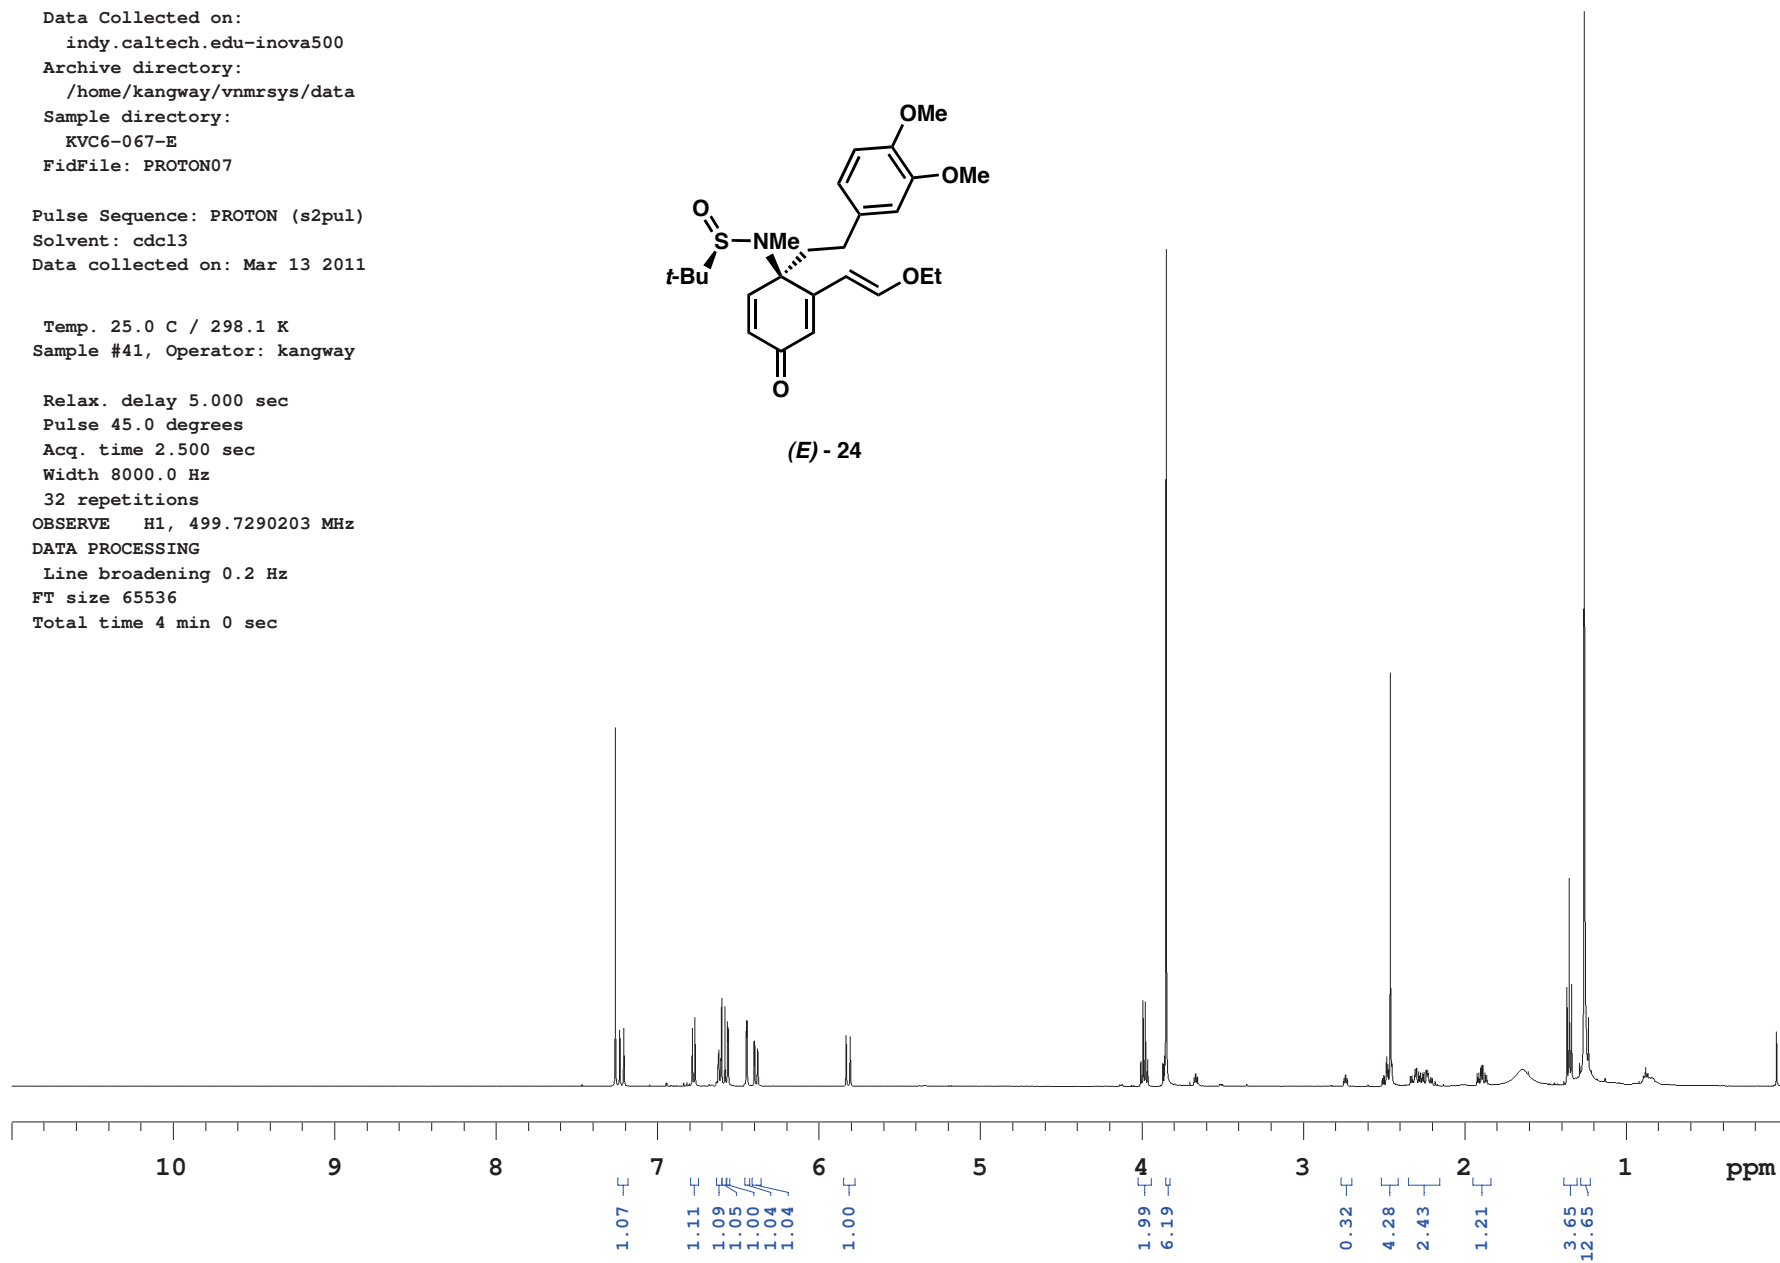

KVC6-067-E

Sample Name:  
KVC6-067-E  
Data Collected on:  
indy.caltech.edu-inova500  
Archive directory:  
/home/kangway/vnmrsys/data  
Sample directory:  
KVC6-067-E  
FidFile: CARBON04

Pulse Sequence: CARBON (s2pul)  
Solvent: cdcl3  
Data collected on: Mar 13 2011

Temp. 25.0 C / 298.1 K  
Sample #41, Operator: kangway

Relax. delay 1.000 sec  
Pulse 45.0 degrees  
Acq. time 1.042 sec  
Width 31446.5 Hz  
2000 repetitions  
OBSERVE C13, 125.6569623 MHz  
DECOUPLE H1, 499.7315163 MHz  
Power 39 dB  
continuously on  
WALTZ-16 modulated  
DATA PROCESSING  
Line broadening 0.5 Hz  
FT size 65536  
Total time 1 hr, 8 min

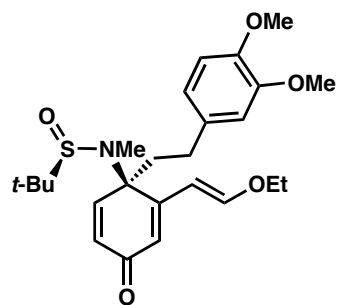

(E) - 24

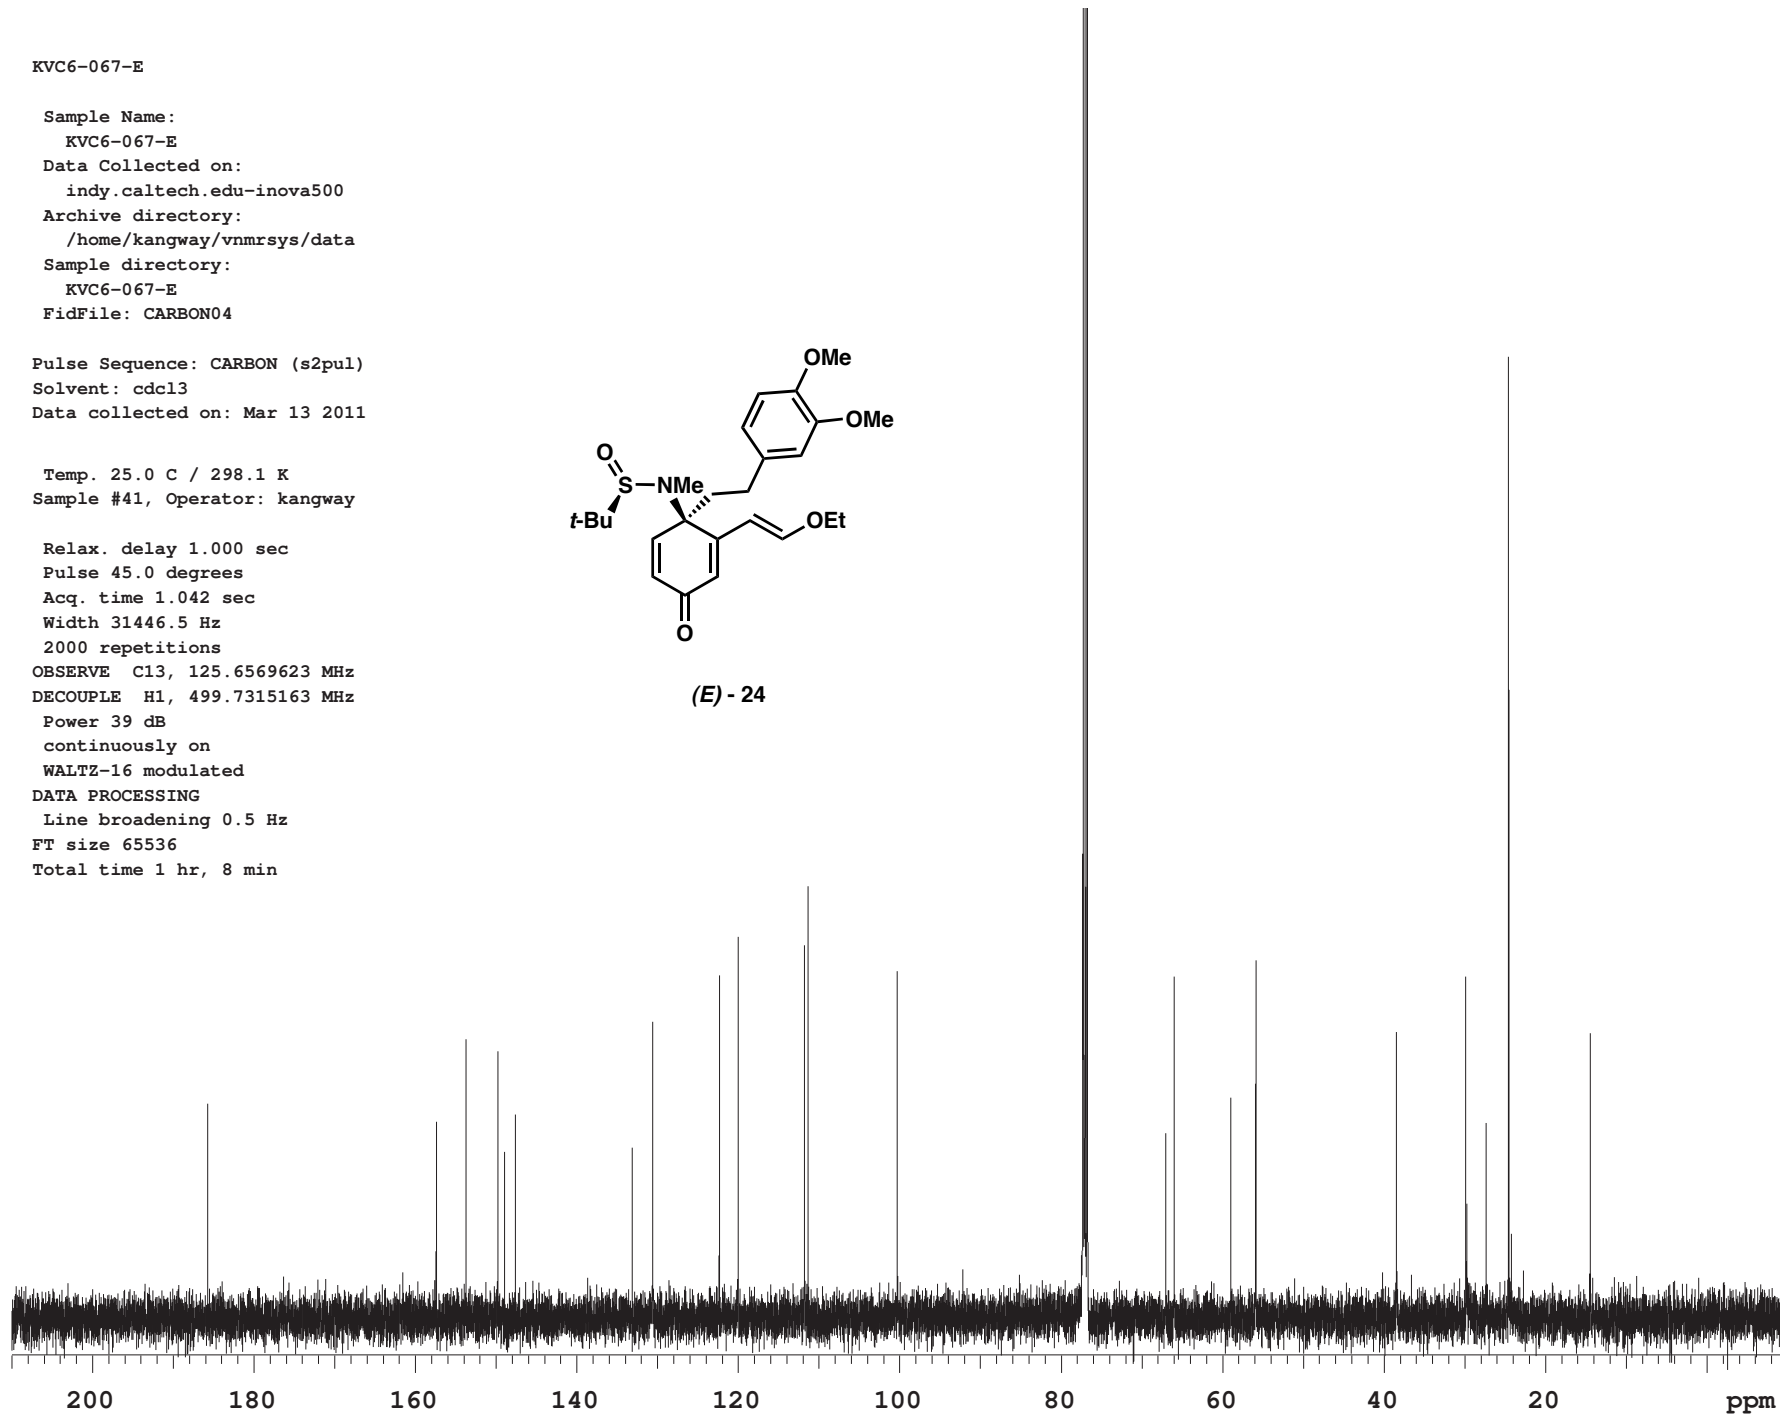



KVC6-037

Sample Name:

KVC6-037

Data Collected on:

indy.caltech.edu-inova500

Archive directory:

/home/kangway/vnmrsys/data

Sample directory:

KVC6-037

FidFile: PROTON01

Pulse Sequence: PROTON (s2pul)

Solvent: cdcl3

Data collected on: Oct 26 2010

Temp. 25.0 C / 298.1 K

Sample #37, Operator: kangway

Relax. delay 5.000 sec

Pulse 45.0 degrees

Acq. time 2.500 sec

Width 8000.0 Hz

32 repetitions

OBSERVE H1, 499.7420505 MHz

DATA PROCESSING

FT size 65536

Total time 4 min 0 sec

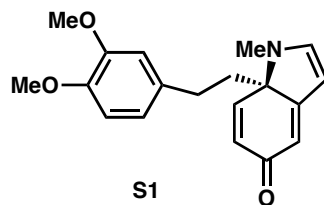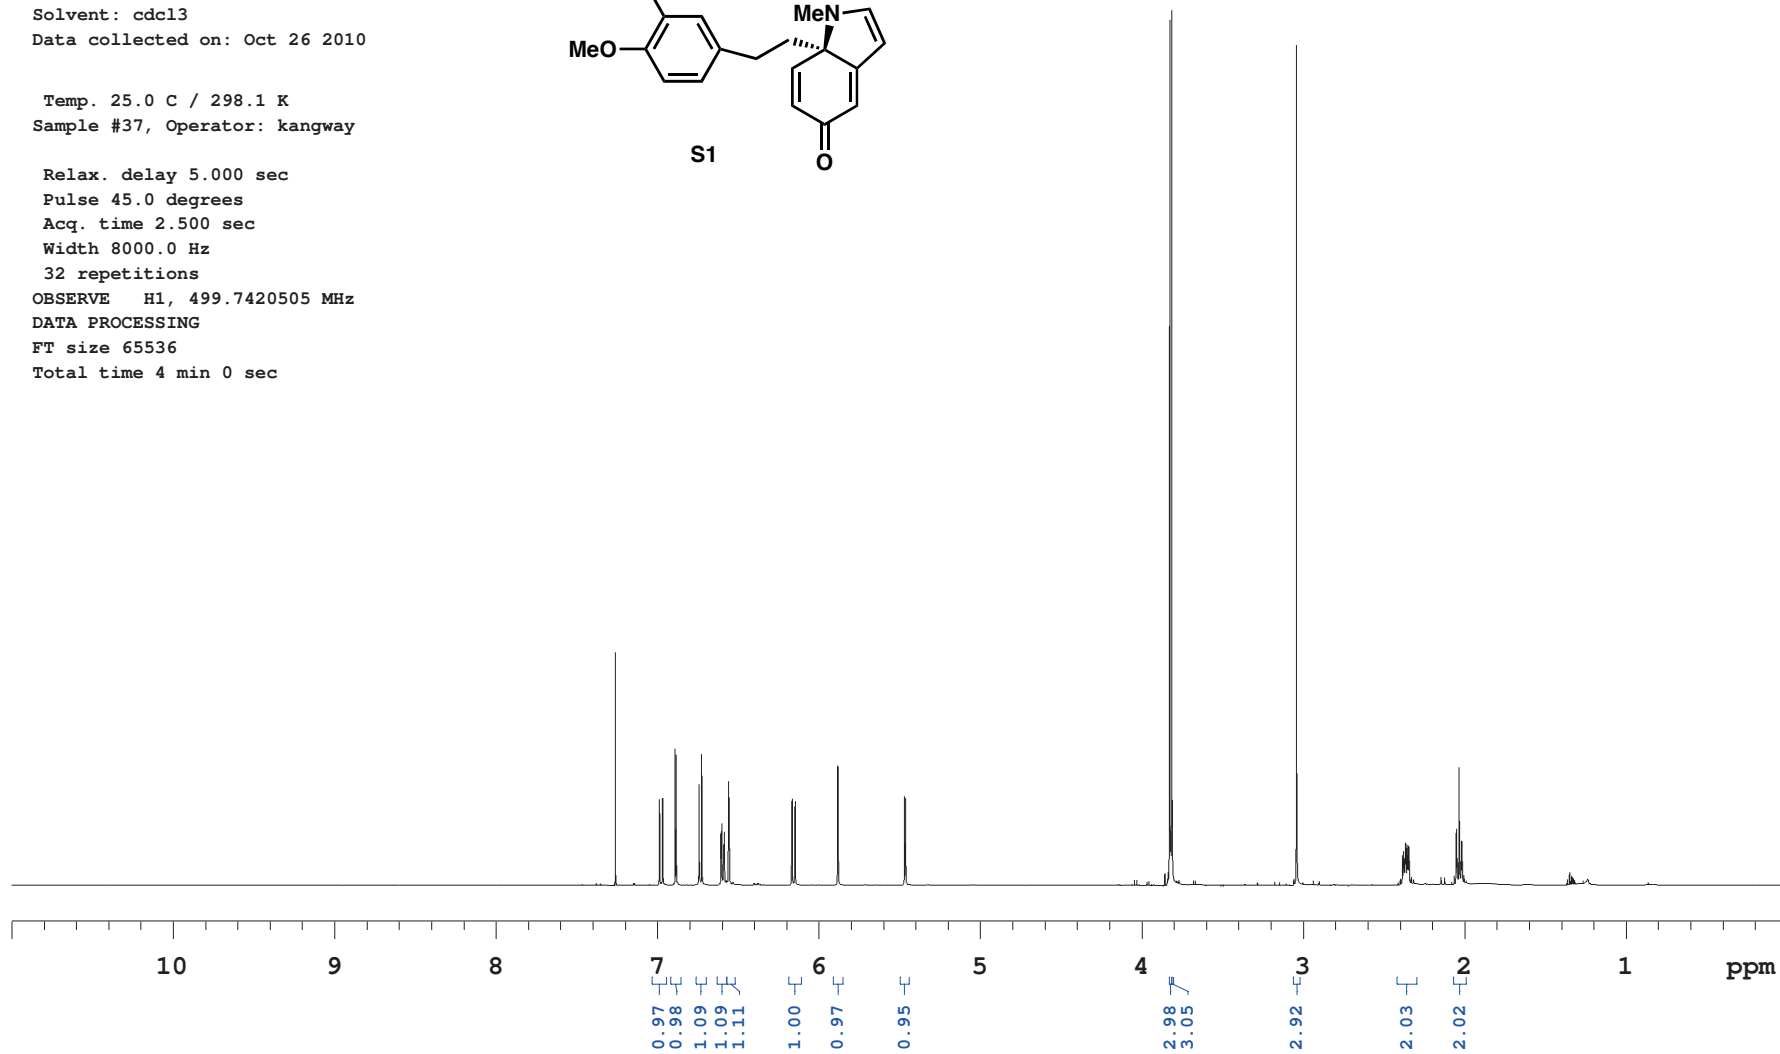

KVC6-037

Sample Name:

KVC6-037

Data Collected on:

indy.caltech.edu-inova500

Archive directory:

/home/kangway/vnmrsys/data

Sample directory:

KVC6-037

FidFile: CARBON01

Pulse Sequence: CARBON (s2pul)

Solvent: cdcl3

Data collected on: Oct 26 2010

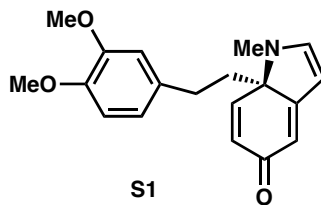

Temp. 25.0 C / 298.1 K

Sample #37, Operator: kangway

Relax. delay 1.000 sec

Pulse 45.0 degrees

Acq. time 1.042 sec

Width 31446.5 Hz

1000 repetitions

OBSERVE C13, 125.6602471 MHz

DECOUPLE H1, 499.7445450 MHz

Power 39 dB

continuously on

WALTZ-16 modulated

DATA PROCESSING

Line broadening 0.5 Hz

FT size 65536

Total time 34 min

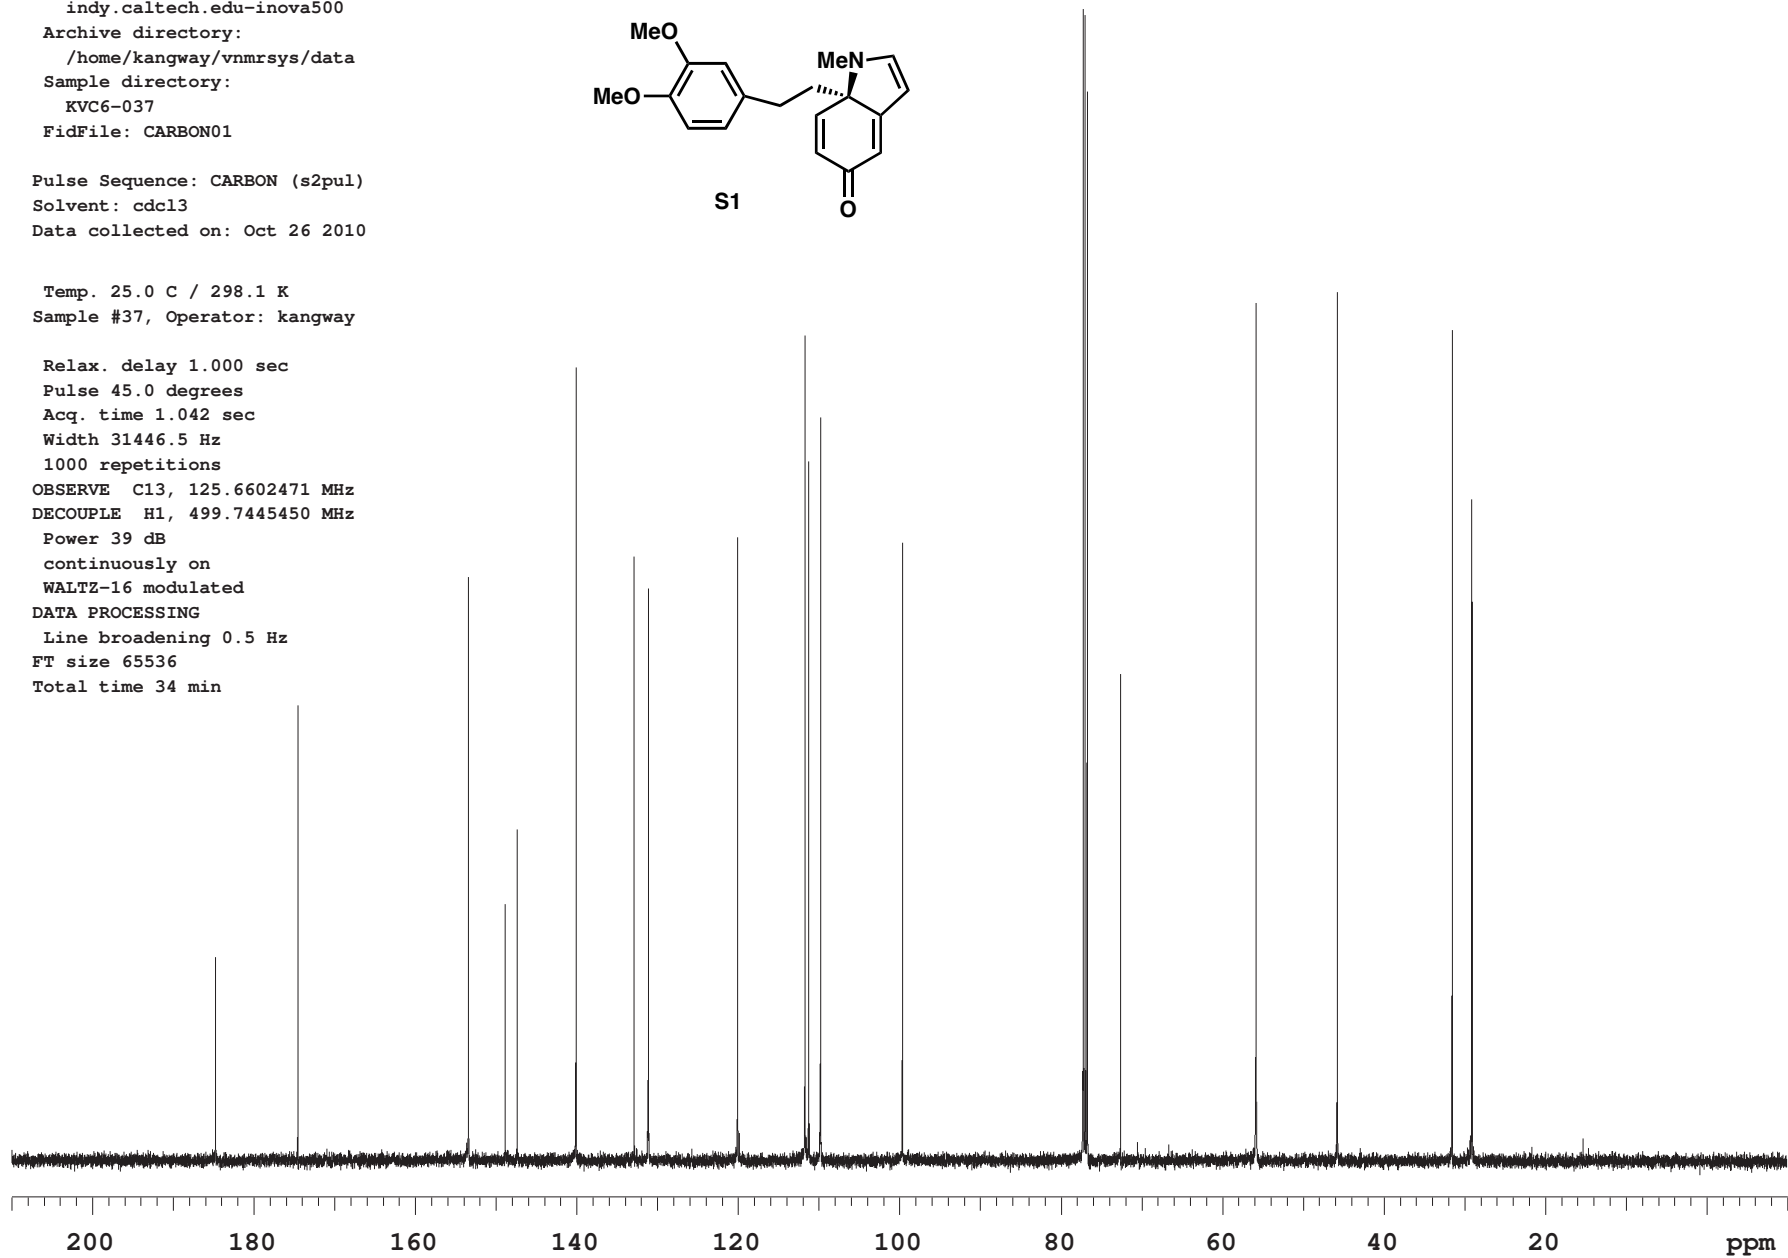

KVC5-239

Sample Name:

KVC5-239

Data Collected on:

indy.caltech.edu-inova500

Archive directory:

/home/kangway/vnmrsys/data

Sample directory:

KVC5-239

FidFile: PROTON01

Pulse Sequence: PROTON (s2pul)

Solvent: cdcl3

Data collected on: Oct 16 2010

Temp. 25.0 C / 298.1 K

Sample #35, Operator: kangway

Relax. delay 5.000 sec

Pulse 45.0 degrees

Acq. time 2.500 sec

Width 8000.0 Hz

32 repetitions

OBSERVE H1, 499.7420505 MHz

DATA PROCESSING

Line broadening 0.2 Hz

FT size 65536

Total time 4 min 0 sec

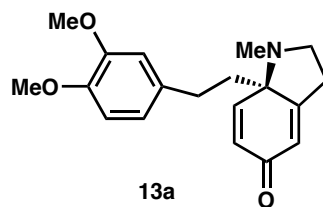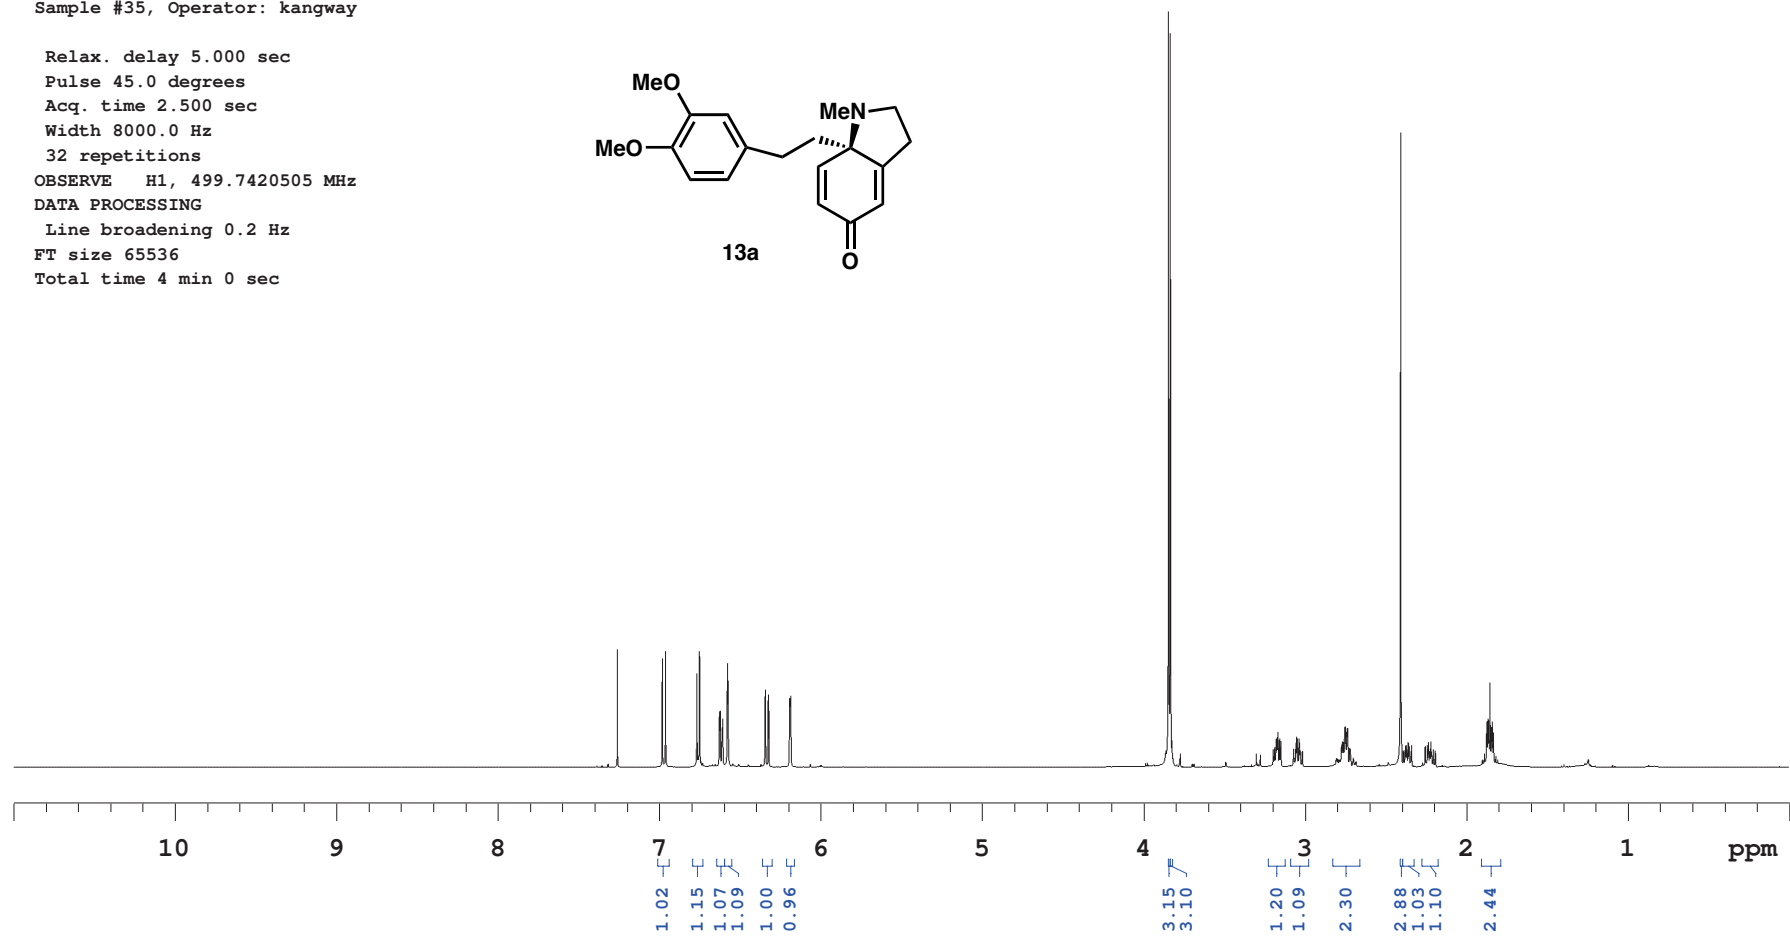

KVC5-239

Sample Name:

KVC5-239

Data Collected on:

indy.caltech.edu-inova500

Archive directory:

/home/kangway/vnmrsys/data

Sample directory:

KVC5-239

FidFile: CARBON01

Pulse Sequence: CARBON (s2pul)

Solvent: cdc13

Data collected on: Oct 16 2010

Temp. 25.0 C / 298.1 K

Sample #35, Operator: kangway

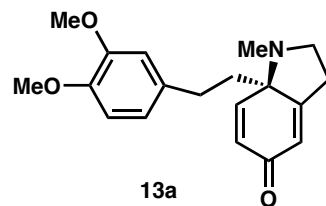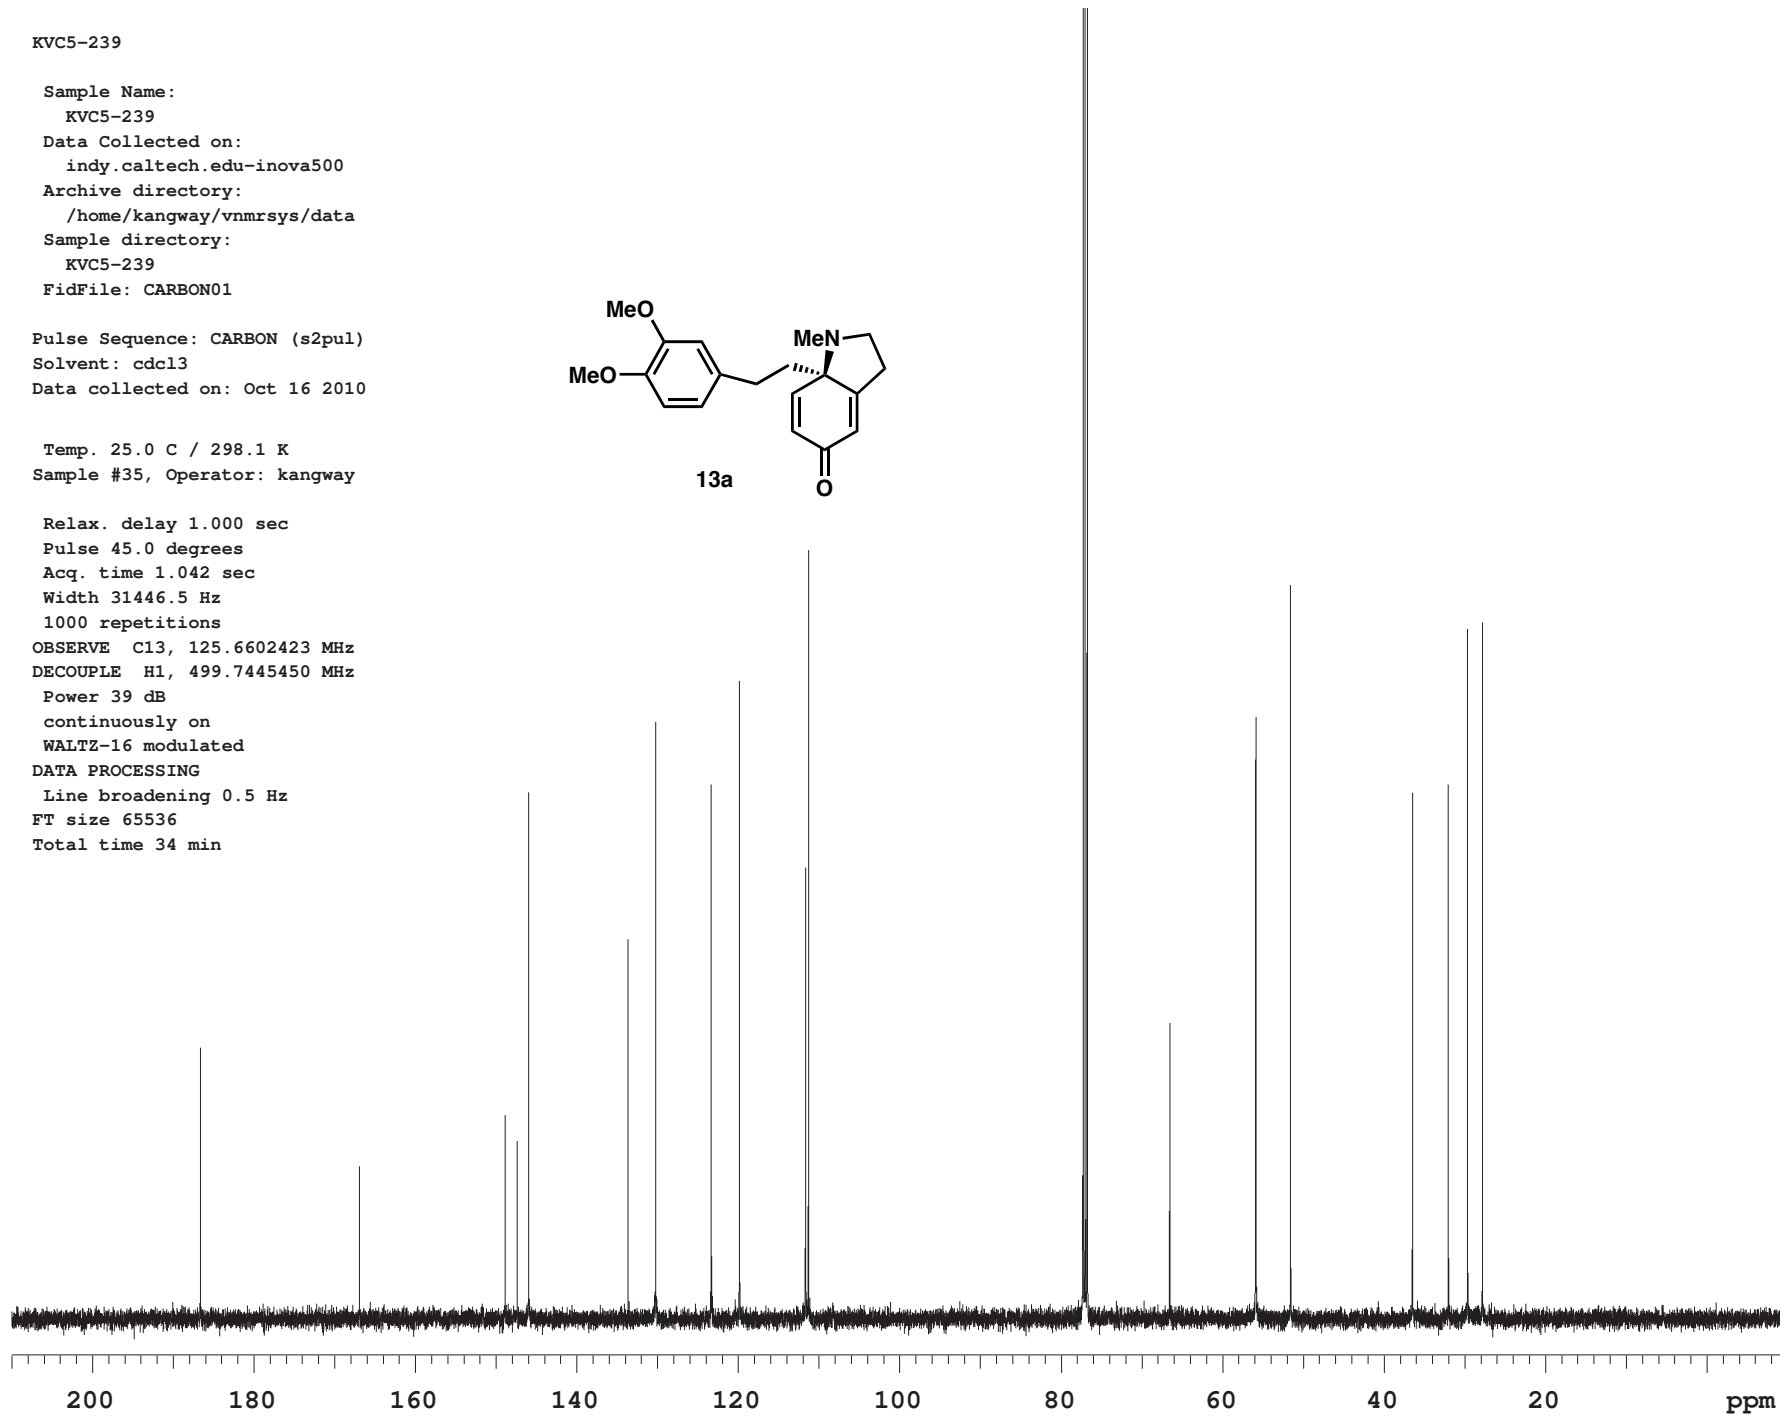

KVC5-243

Sample Name:

KVC5-243

Data Collected on:

indy.caltech.edu-inova500

Archive directory:

/home/kangway/vnmrsys/data

Sample directory:

KVC5-243

FidFile: PROTON01

Pulse Sequence: PROTON (s2pul)

Solvent: cdc13

Data collected on: Oct 16 2010

Temp. 25.0 C / 298.1 K

Sample #36, Operator: kangway

Relax. delay 5.000 sec

Pulse 45.0 degrees

Acq. time 2.500 sec

Width 8000.0 Hz

32 repetitions

OBSERVE H1, 499.7420505 MHz

DATA PROCESSING

Line broadening 0.2 Hz

FT size 65536

Total time 4 min 0 sec

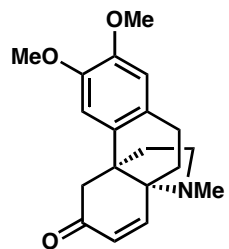

12a

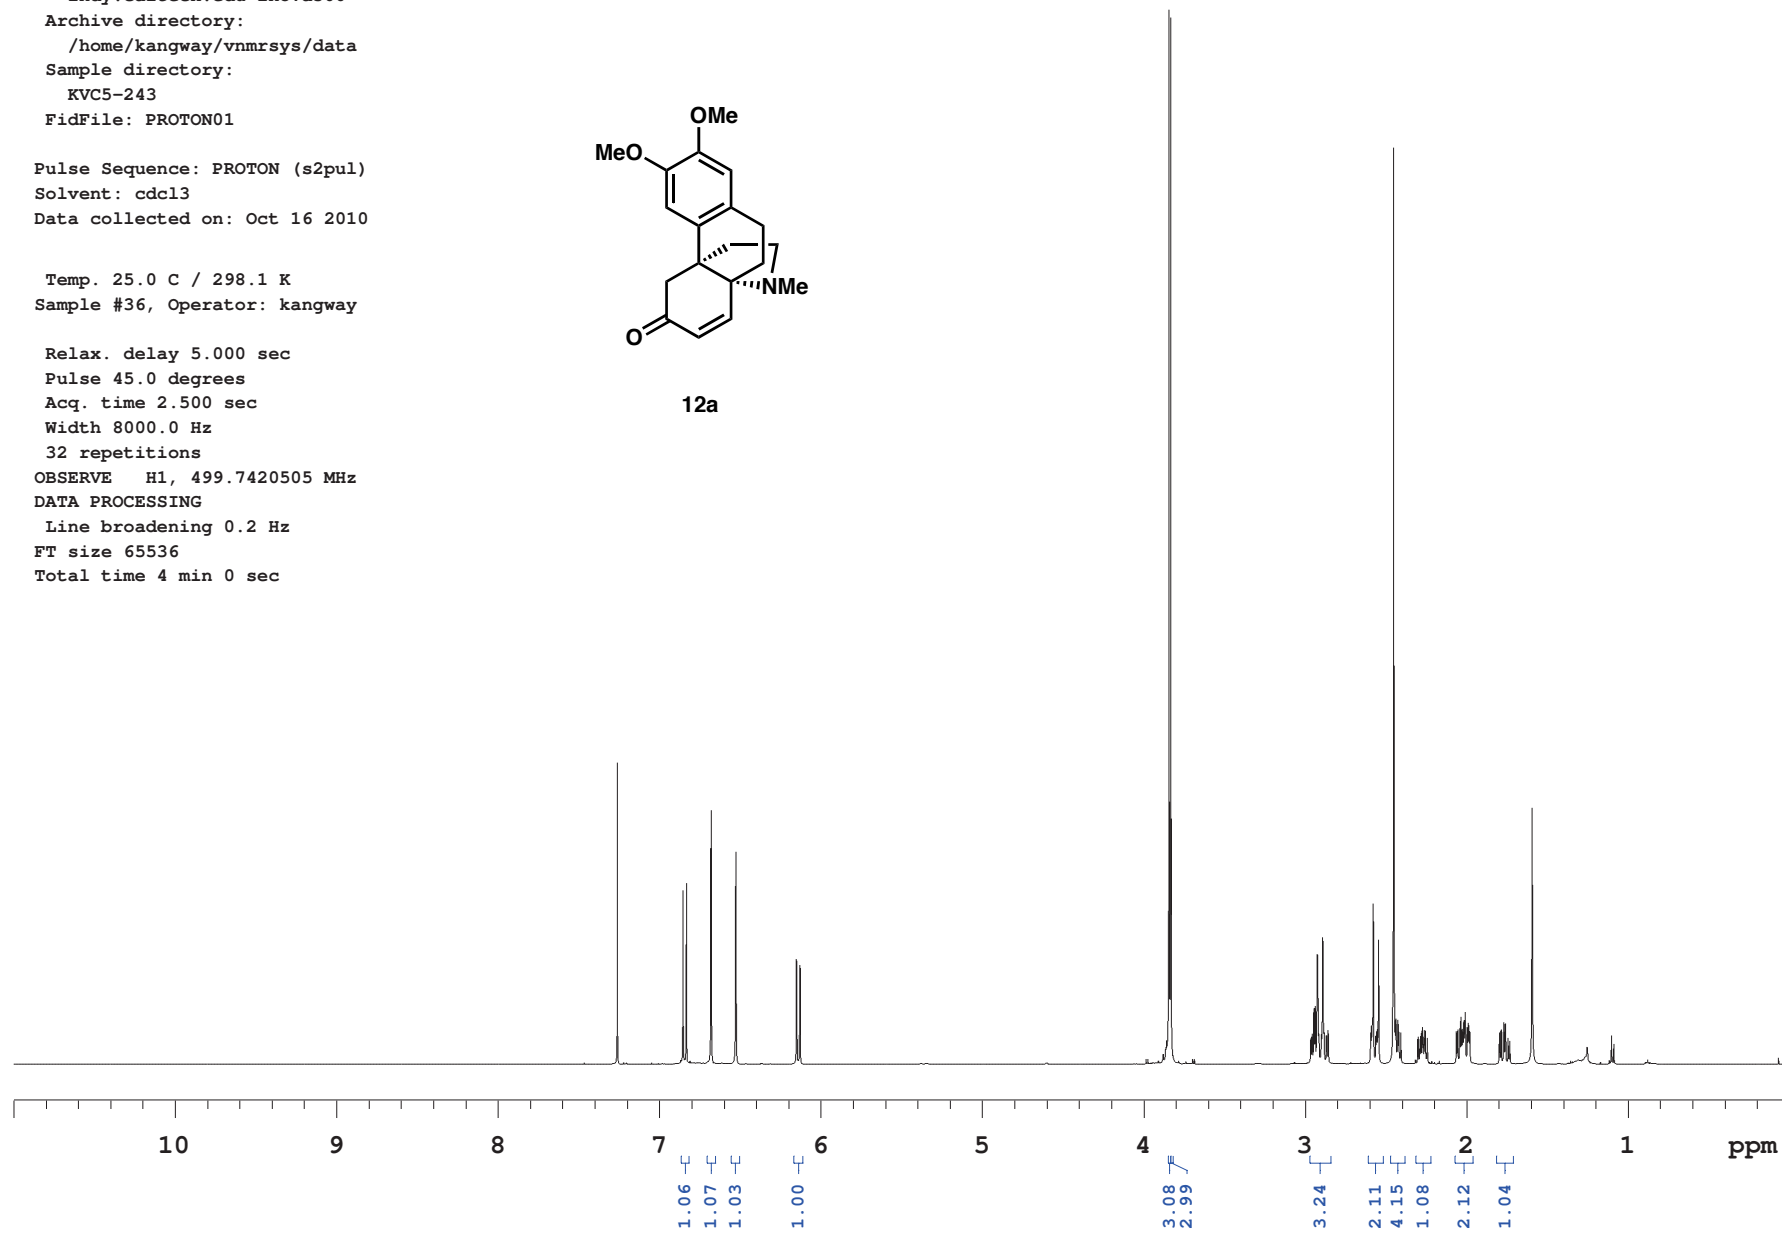

KVC5-243

Sample Name:

KVC5-243

Data Collected on:

indy.caltech.edu-inova500

Archive directory:

/home/kangway/vnmrsys/data

Sample directory:

KVC5-243

FidFile: CARBON01

Pulse Sequence: CARBON (s2pul)

Solvent: cdc13

Data collected on: Oct 16 2010

Temp. 25.0 C / 298.1 K

Sample #36, Operator: kangway

Relax. delay 1.000 sec

Pulse 45.0 degrees

Acq. time 1.042 sec

Width 31446.5 Hz

1000 repetitions

OBSERVE C13, 125.6602394 MHz

DECOUPLE H1, 499.7445450 MHz

Power 39 dB

continuously on

WALTZ-16 modulated

DATA PROCESSING

Line broadening 0.5 Hz

FT size 65536

Total time 34 min

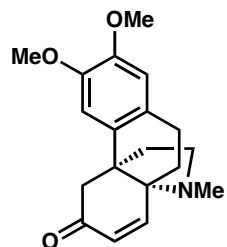

12a

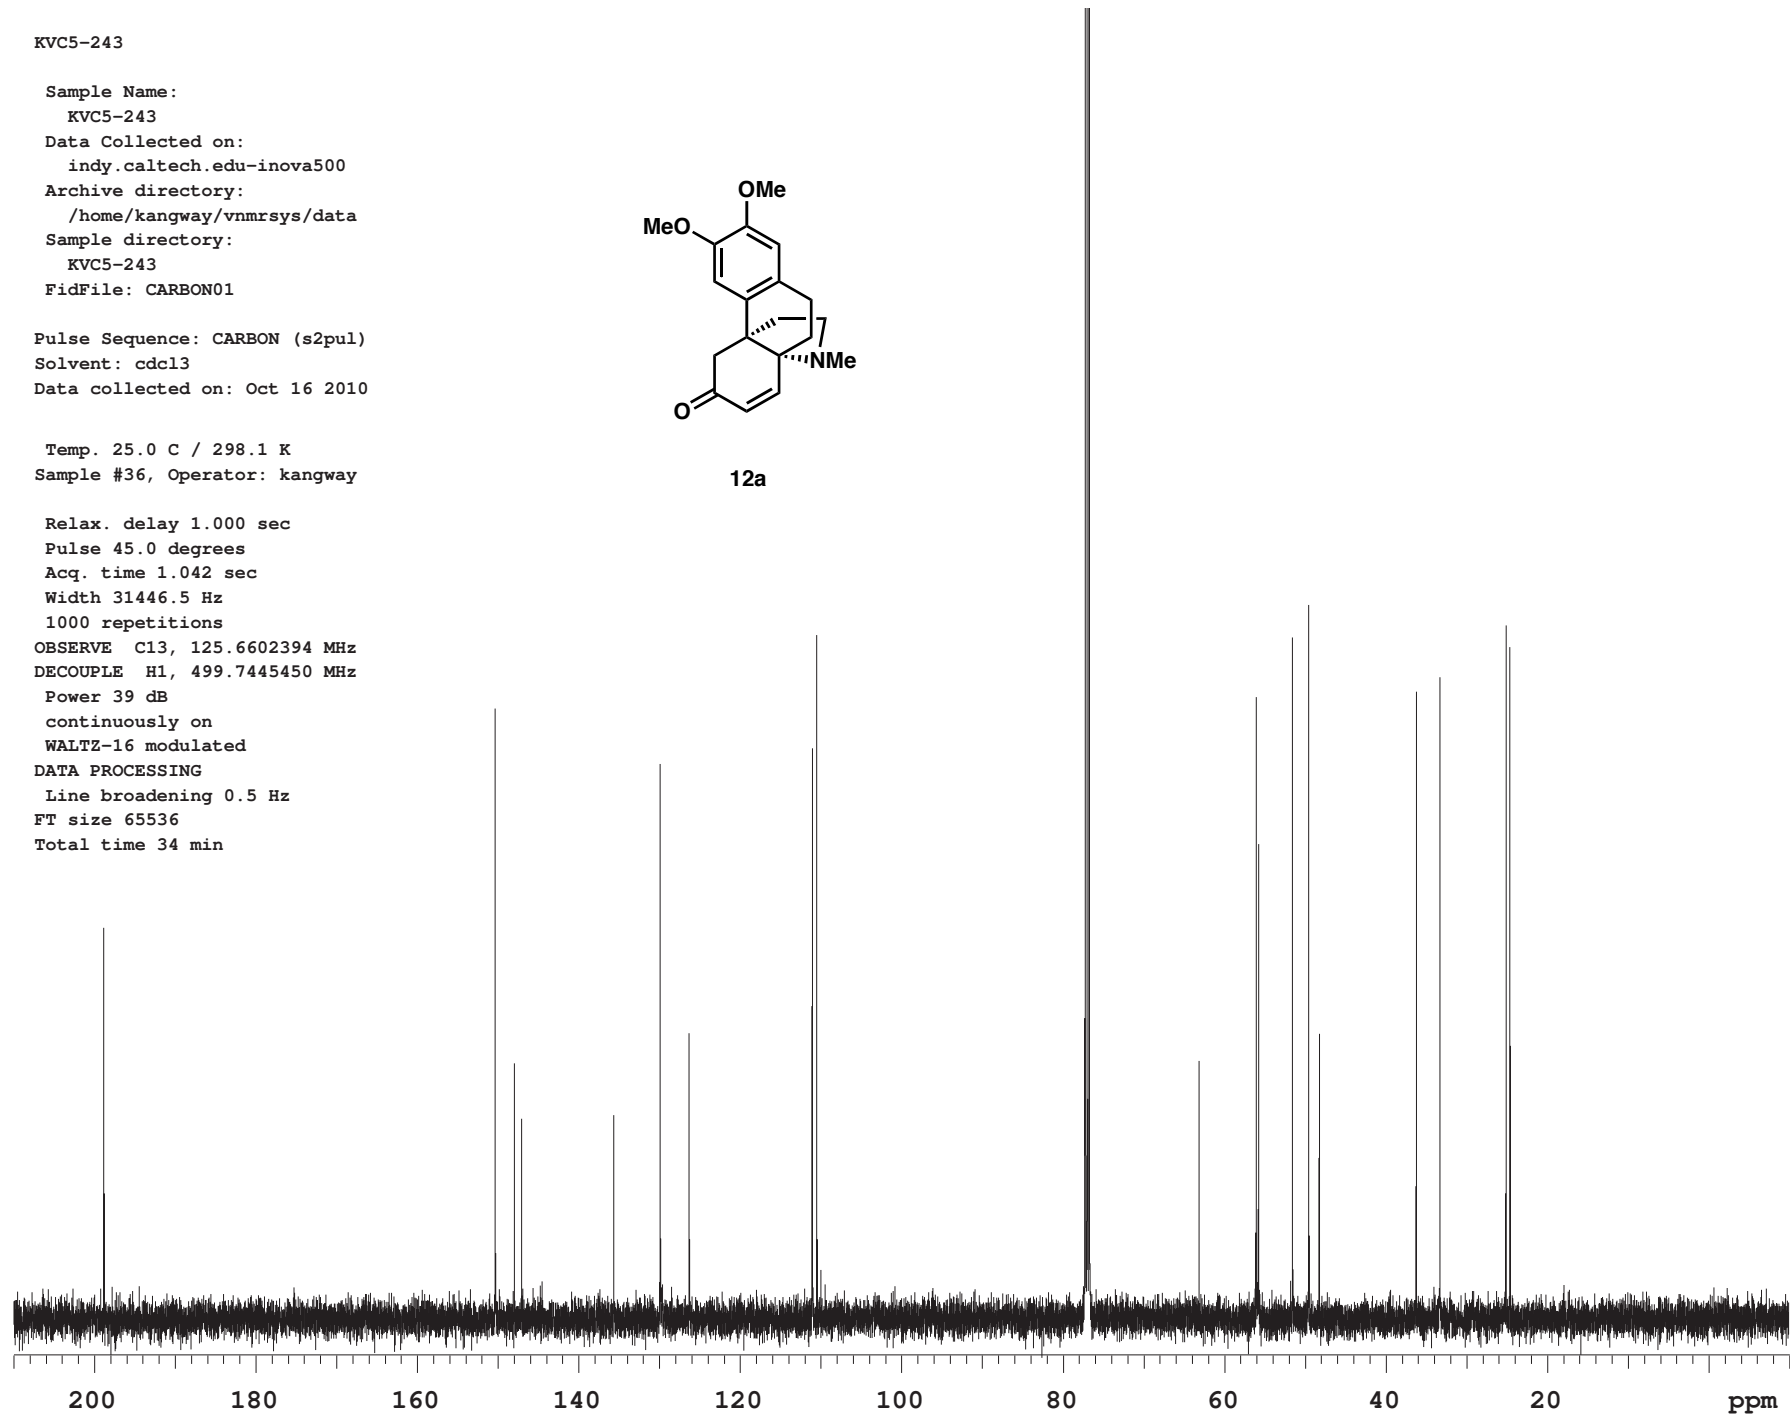

KVC8-027  
Hemiaminal

Sample Name:  
KVC8-027  
Data Collected on:  
indy.caltech.edu-inova500  
Archive directory:  
/home/kangway/vnmrsys/data  
Sample directory:  
KVC8-027  
FidFile: PROTON02

Pulse Sequence: PROTON (s2pul)  
Solvent: cdcl3  
Data collected on: Feb 28 2011

Temp. 25.0 C / 298.1 K  
Sample #42, Operator: kangway

Relax. delay 5.000 sec  
Pulse 45.0 degrees  
Acq. time 2.500 sec  
Width 8000.0 Hz  
32 repetitions  
OBSERVE H1, 499.7290200 MHz  
DATA PROCESSING  
Line broadening 0.2 Hz  
FT size 65536  
Total time 4 min 0 sec

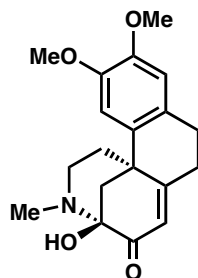

28

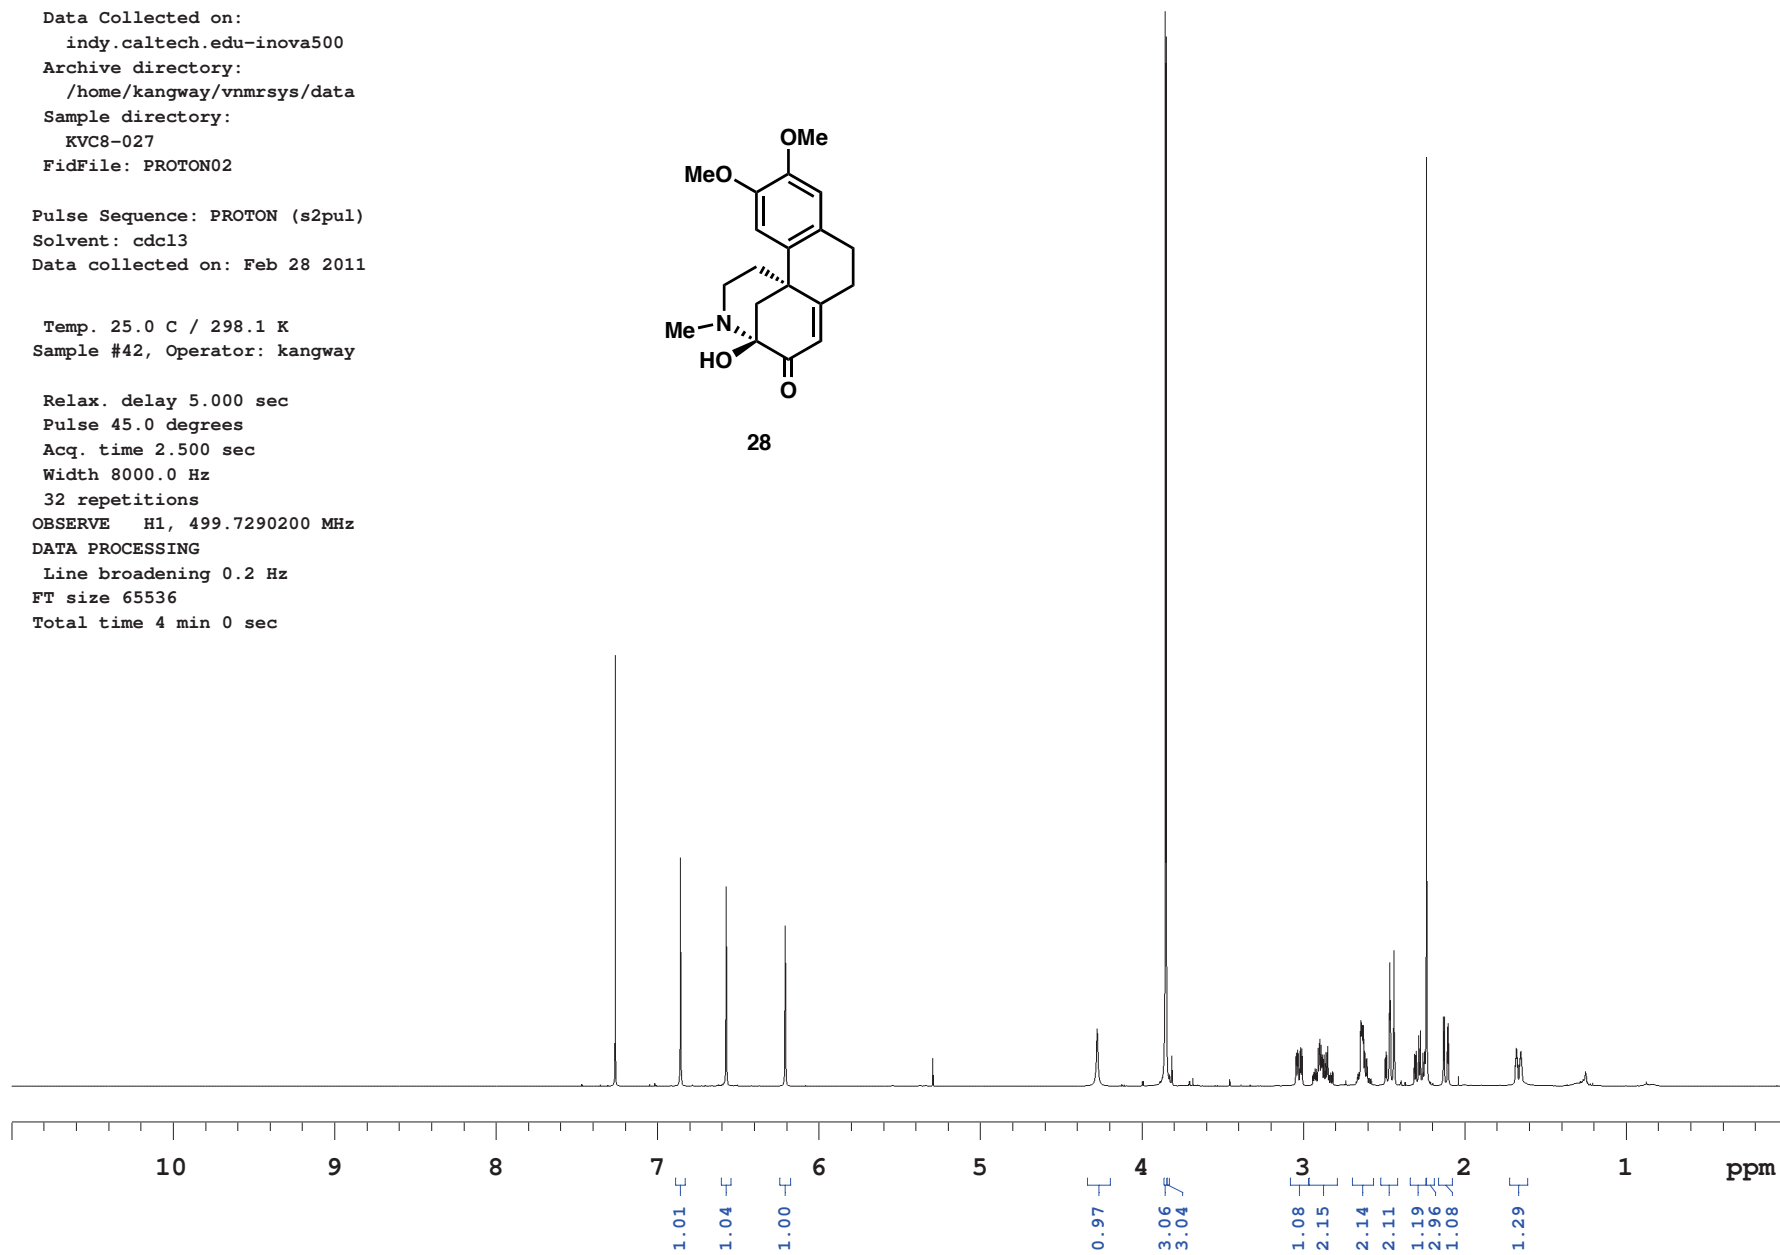

KVC8-027  
Hemiaminal

Sample Name:  
KVC8-027  
Data Collected on:  
indy.caltech.edu-inova500  
Archive directory:  
/home/kangway/vnmrsys/data  
Sample directory:  
KVC8-027  
FidFile: CARBON01

Pulse Sequence: CARBON (s2pul)  
Solvent: cdcl3  
Data collected on: Feb 28 2011

Temp. 25.0 C / 298.1 K  
Sample #42, Operator: kangway

Relax. delay 1.000 sec  
Pulse 45.0 degrees  
Acq. time 1.042 sec  
Width 31446.5 Hz  
1000 repetitions  
OBSERVE C13, 125.6569642 MHz  
DECOUPLE H1, 499.7315163 MHz  
Power 39 dB  
continuously on  
WALTZ-16 modulated  
DATA PROCESSING  
Line broadening 0.5 Hz  
FT size 65536  
Total time 34 min

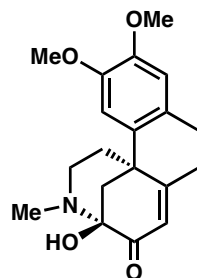

28

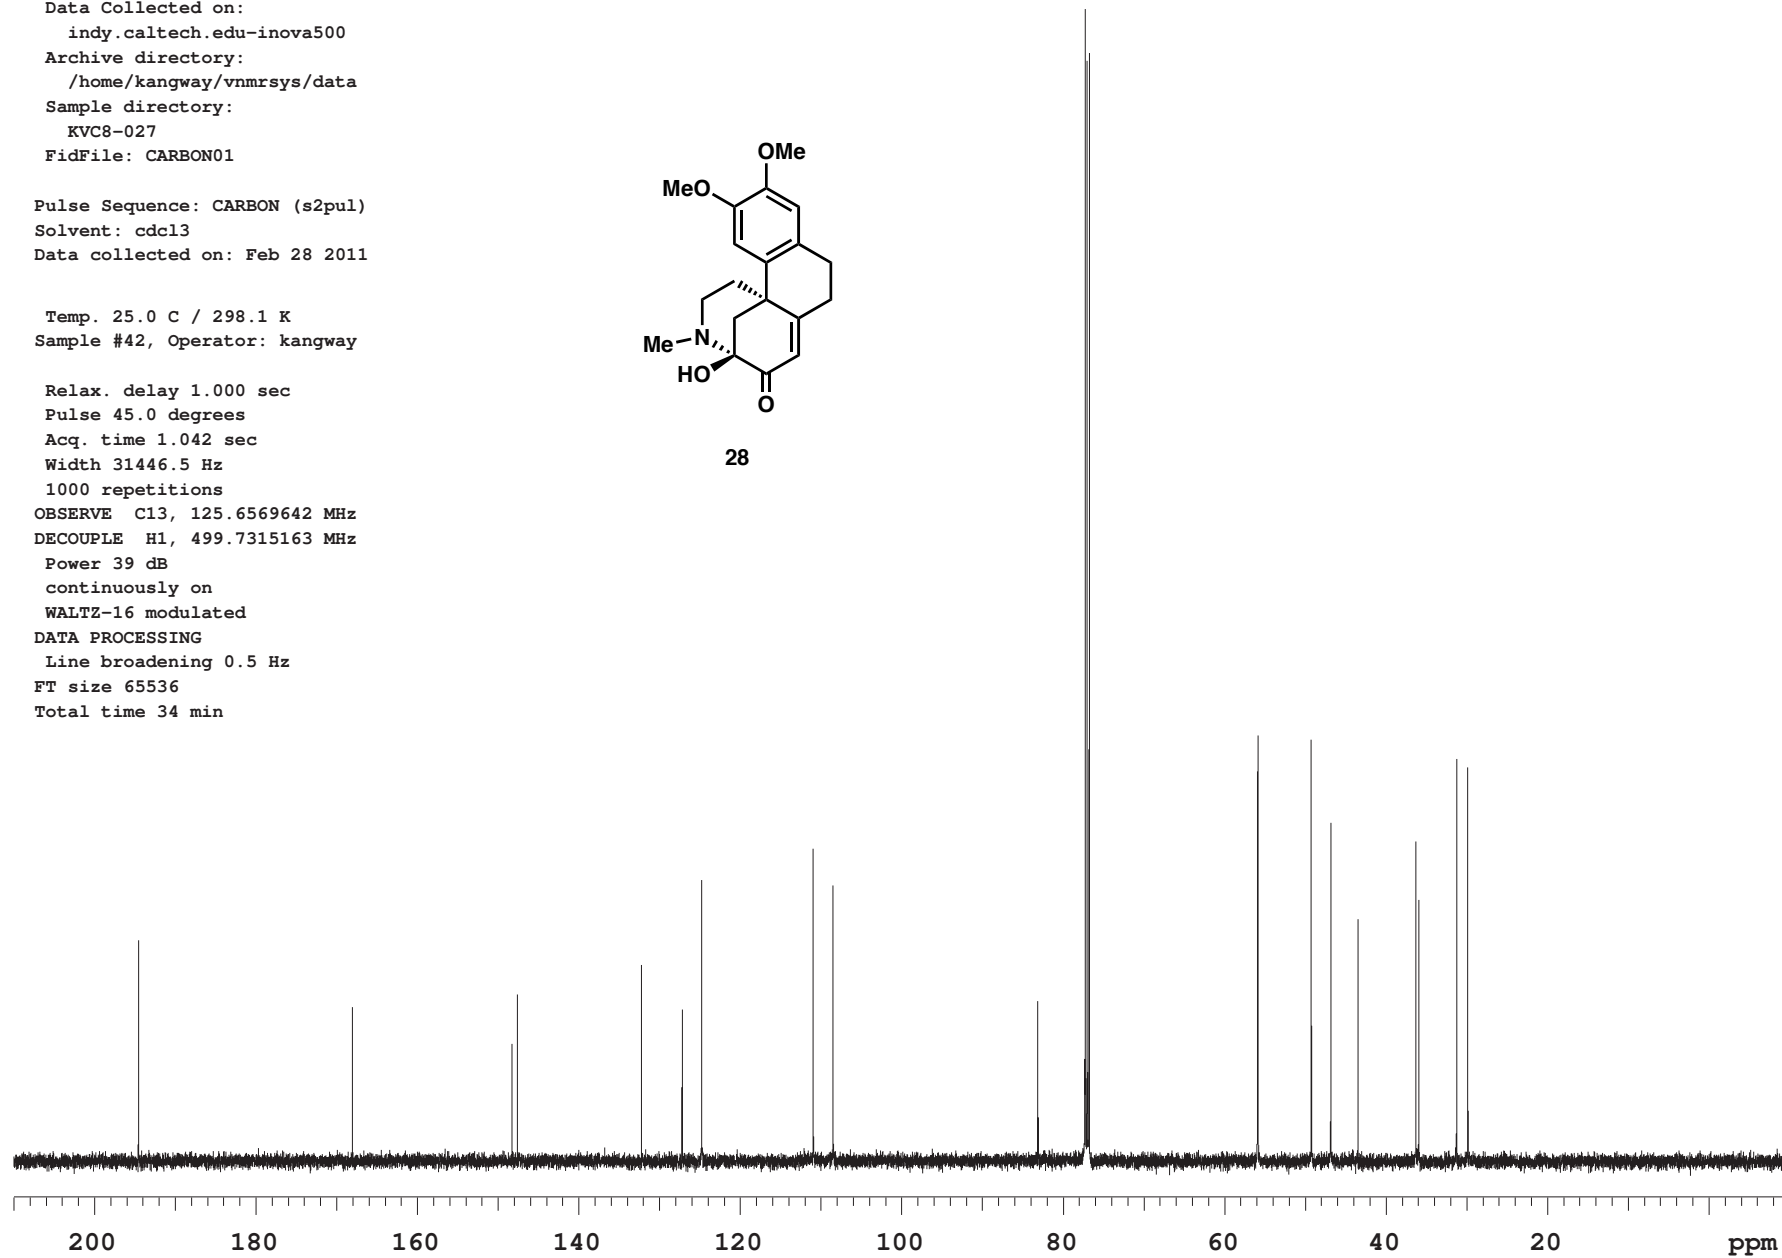



RN4-189  
Cepharatine D

Sample Name:  
RN4-189  
Data Collected on:  
indy.caltech.edu-inova500  
Archive directory:  
/home/kangway/vnmrsys/data  
Sample directory:  
RN4-189  
FidFile: PROTON02

Pulse Sequence: PROTON (s2pul)  
Solvent: cdcl3  
Data collected on: Jun 2 2011

Temp. 25.0 C / 298.1 K  
Sample #46, Operator: kangway

Relax. delay 5.000 sec  
Pulse 45.0 degrees  
Acq. time 2.500 sec  
Width 8000.0 Hz  
32 repetitions  
OBSERVE H1, 499.7290200 MHz  
DATA PROCESSING  
Line broadening 0.2 Hz  
FT size 65536  
Total time 4 min 0 sec

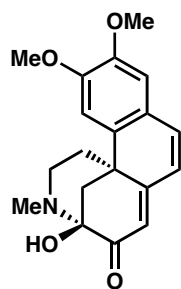

Cepharatine D (10)

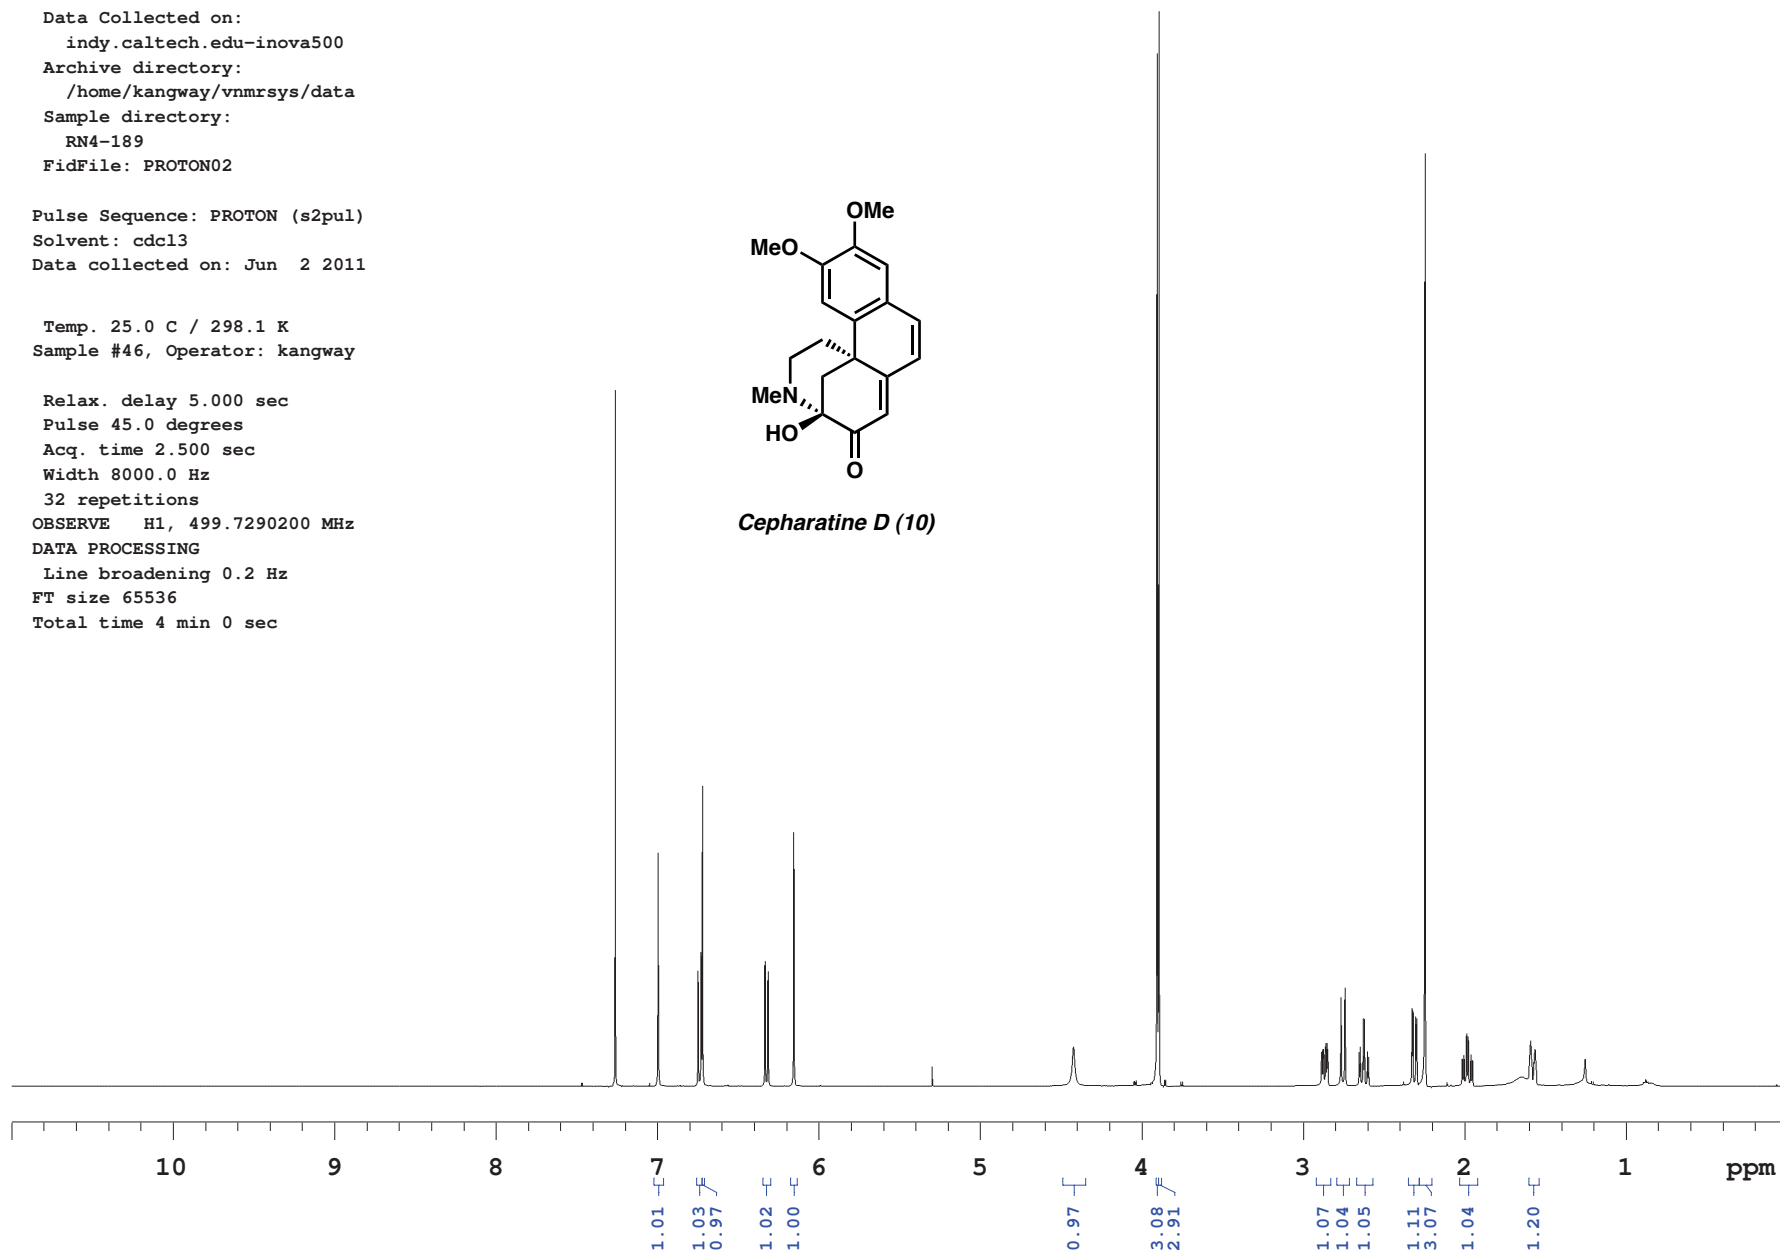

RN4-189  
Cepharatine D

Sample Name:  
RN4-189  
Data Collected on:  
indy.caltech.edu-inova500  
Archive directory:  
/home/kangway/vnmrsys/data  
Sample directory:  
RN4-189  
FidFile: CARBON01

Pulse Sequence: CARBON (s2pul)  
Solvent: cdcl3  
Data collected on: Jun 2 2011

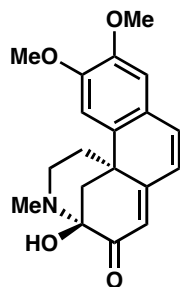

*Cepharatine D (10)*

Temp. 25.0 C / 298.1 K  
Sample #46, Operator: kangway

Relax. delay 1.000 sec  
Pulse 45.0 degrees  
Acq. time 1.042 sec  
Width 31446.5 Hz  
2000 repetitions  
OBSERVE C13, 125.6569623 MHz  
DECOUPLE H1, 499.7315163 MHz  
Power 39 dB  
continuously on  
WALTZ-16 modulated  
DATA PROCESSING  
Line broadening 0.5 Hz  
FT size 65536  
Total time 1 hr, 8 min

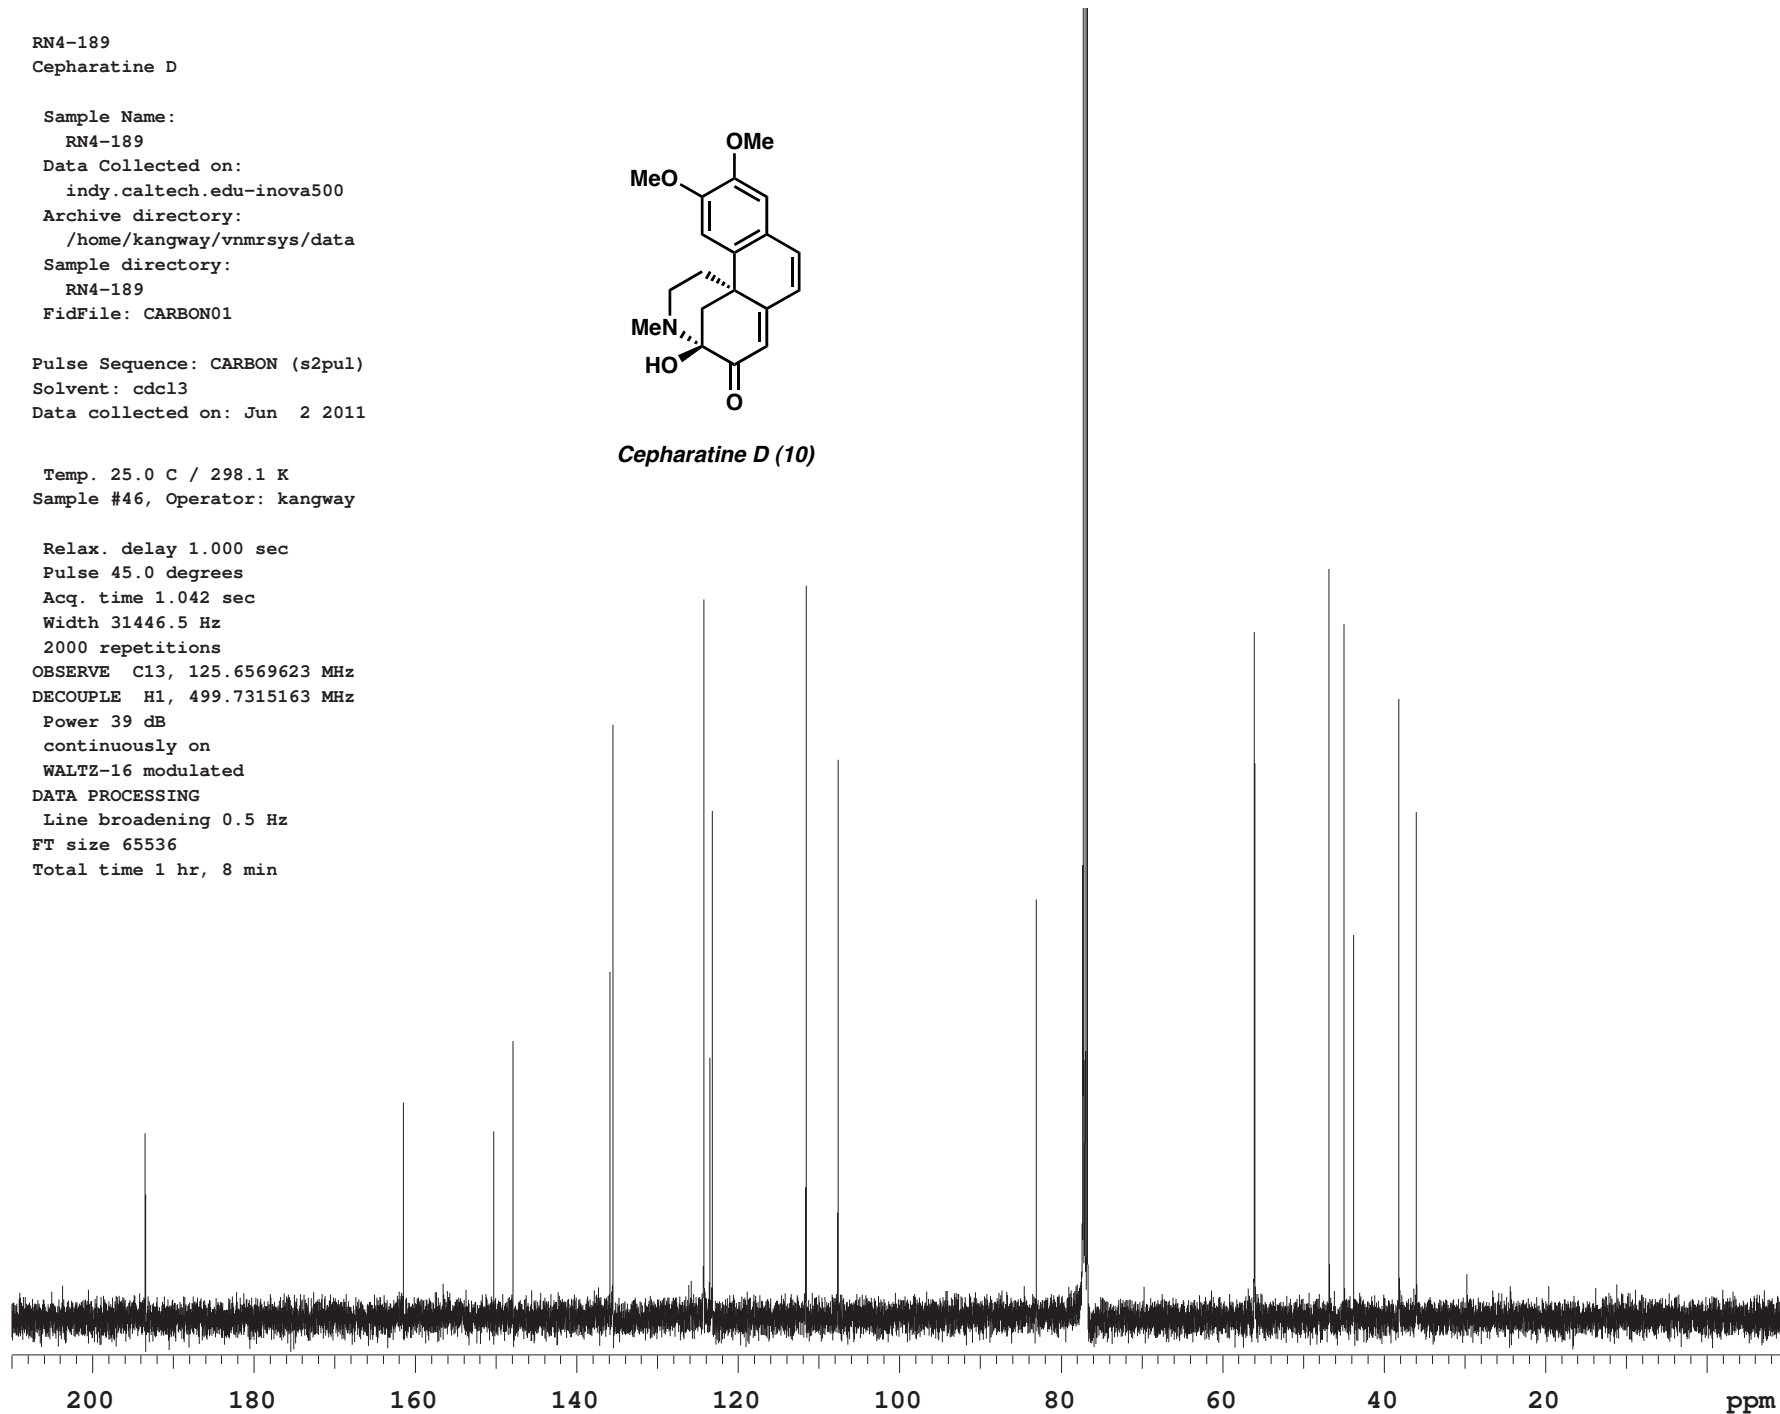

RN4-189

Sample Name:

RN4-189

Data Collected on:

indy.caltech.edu-inova500

Archive directory:

/home/kangway/vnmrsys/data

Sample directory:

RN4-189

FidFile: PROTON05

Pulse Sequence: PROTON (s2pul)

Solvent: cd3od

Data collected on: Jun 3 2011

Temp. 25.0 C / 298.1 K

Sample #39, Operator: kangway

Relax. delay 5.000 sec

Pulse 45.0 degrees

Acq. time 2.500 sec

Width 8000.0 Hz

32 repetitions

OBSERVE H1, 499.7309863 MHz

DATA PROCESSING

FT size 65536

Total time 4 min 0 sec

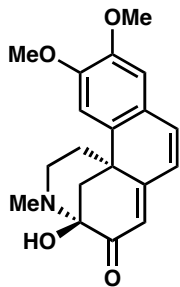

*Cepharatine D (10)*

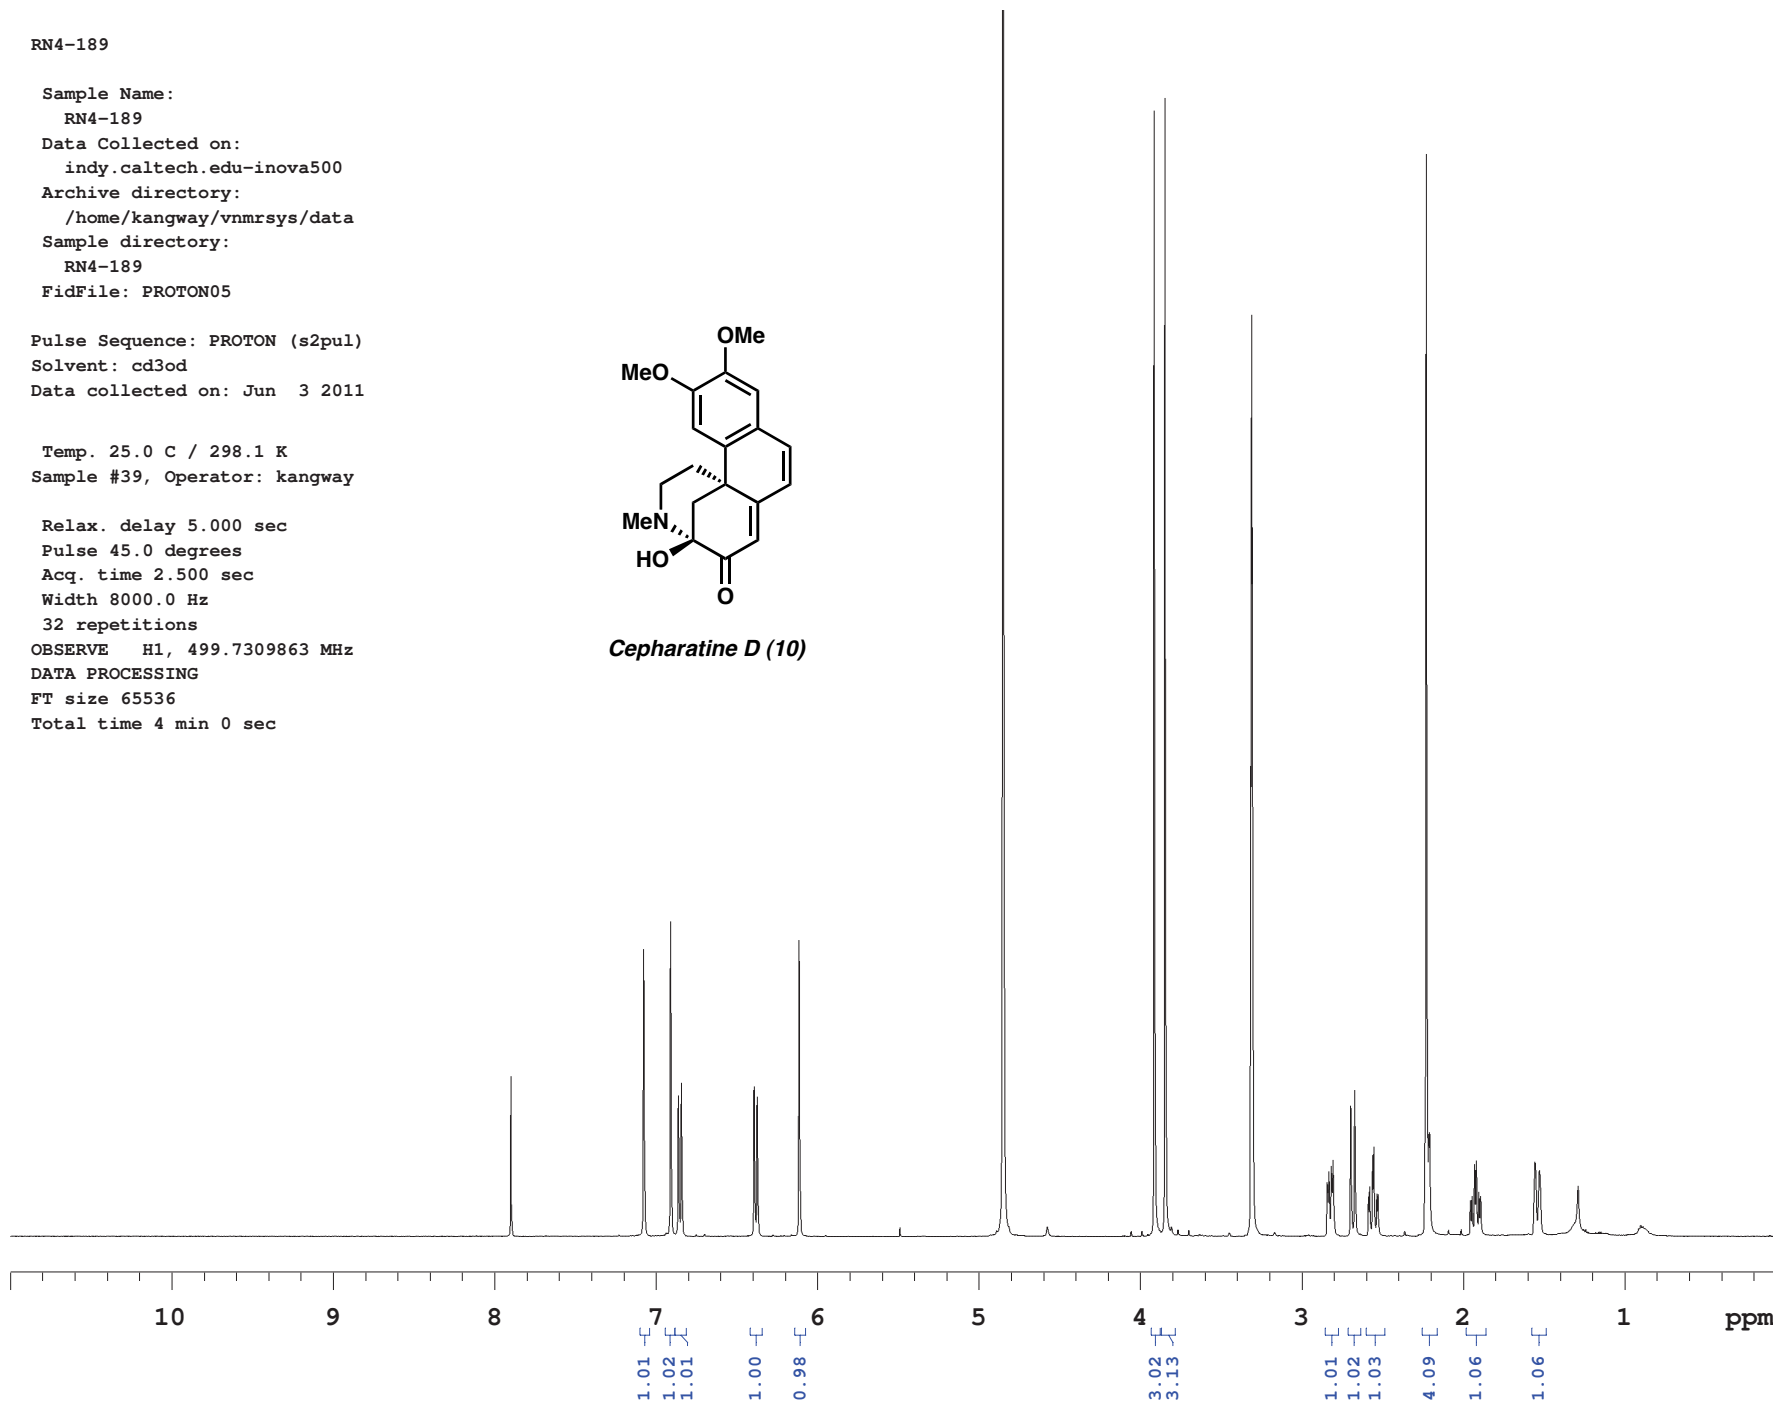

RN4-189  
Cepharatine D

Sample Name:  
RN4-189  
Data Collected on:  
indy.caltech.edu-inova500  
Archive directory:  
/home/kangway/vnmrsys/data  
Sample directory:  
RN4-189  
FidFile: CARBON01

Pulse Sequence: CARBON (s2pul)  
Solvent: cdcl3  
Data collected on: Jun 2 2011

Temp. 25.0 C / 298.1 K  
Sample #46, Operator: kangway

Relax. delay 1.000 sec  
Pulse 45.0 degrees  
Acq. time 1.042 sec  
Width 31446.5 Hz  
2000 repetitions  
OBSERVE C13, 125.6569623 MHz  
DECOUPLE H1, 499.7315163 MHz  
Power 39 dB  
continuously on  
WALTZ-16 modulated  
DATA PROCESSING  
Line broadening 0.5 Hz  
FT size 65536  
Total time 1 hr, 8 min

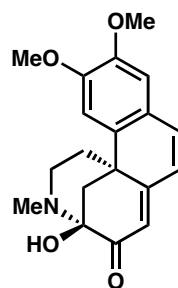

Cepharatine D (10)

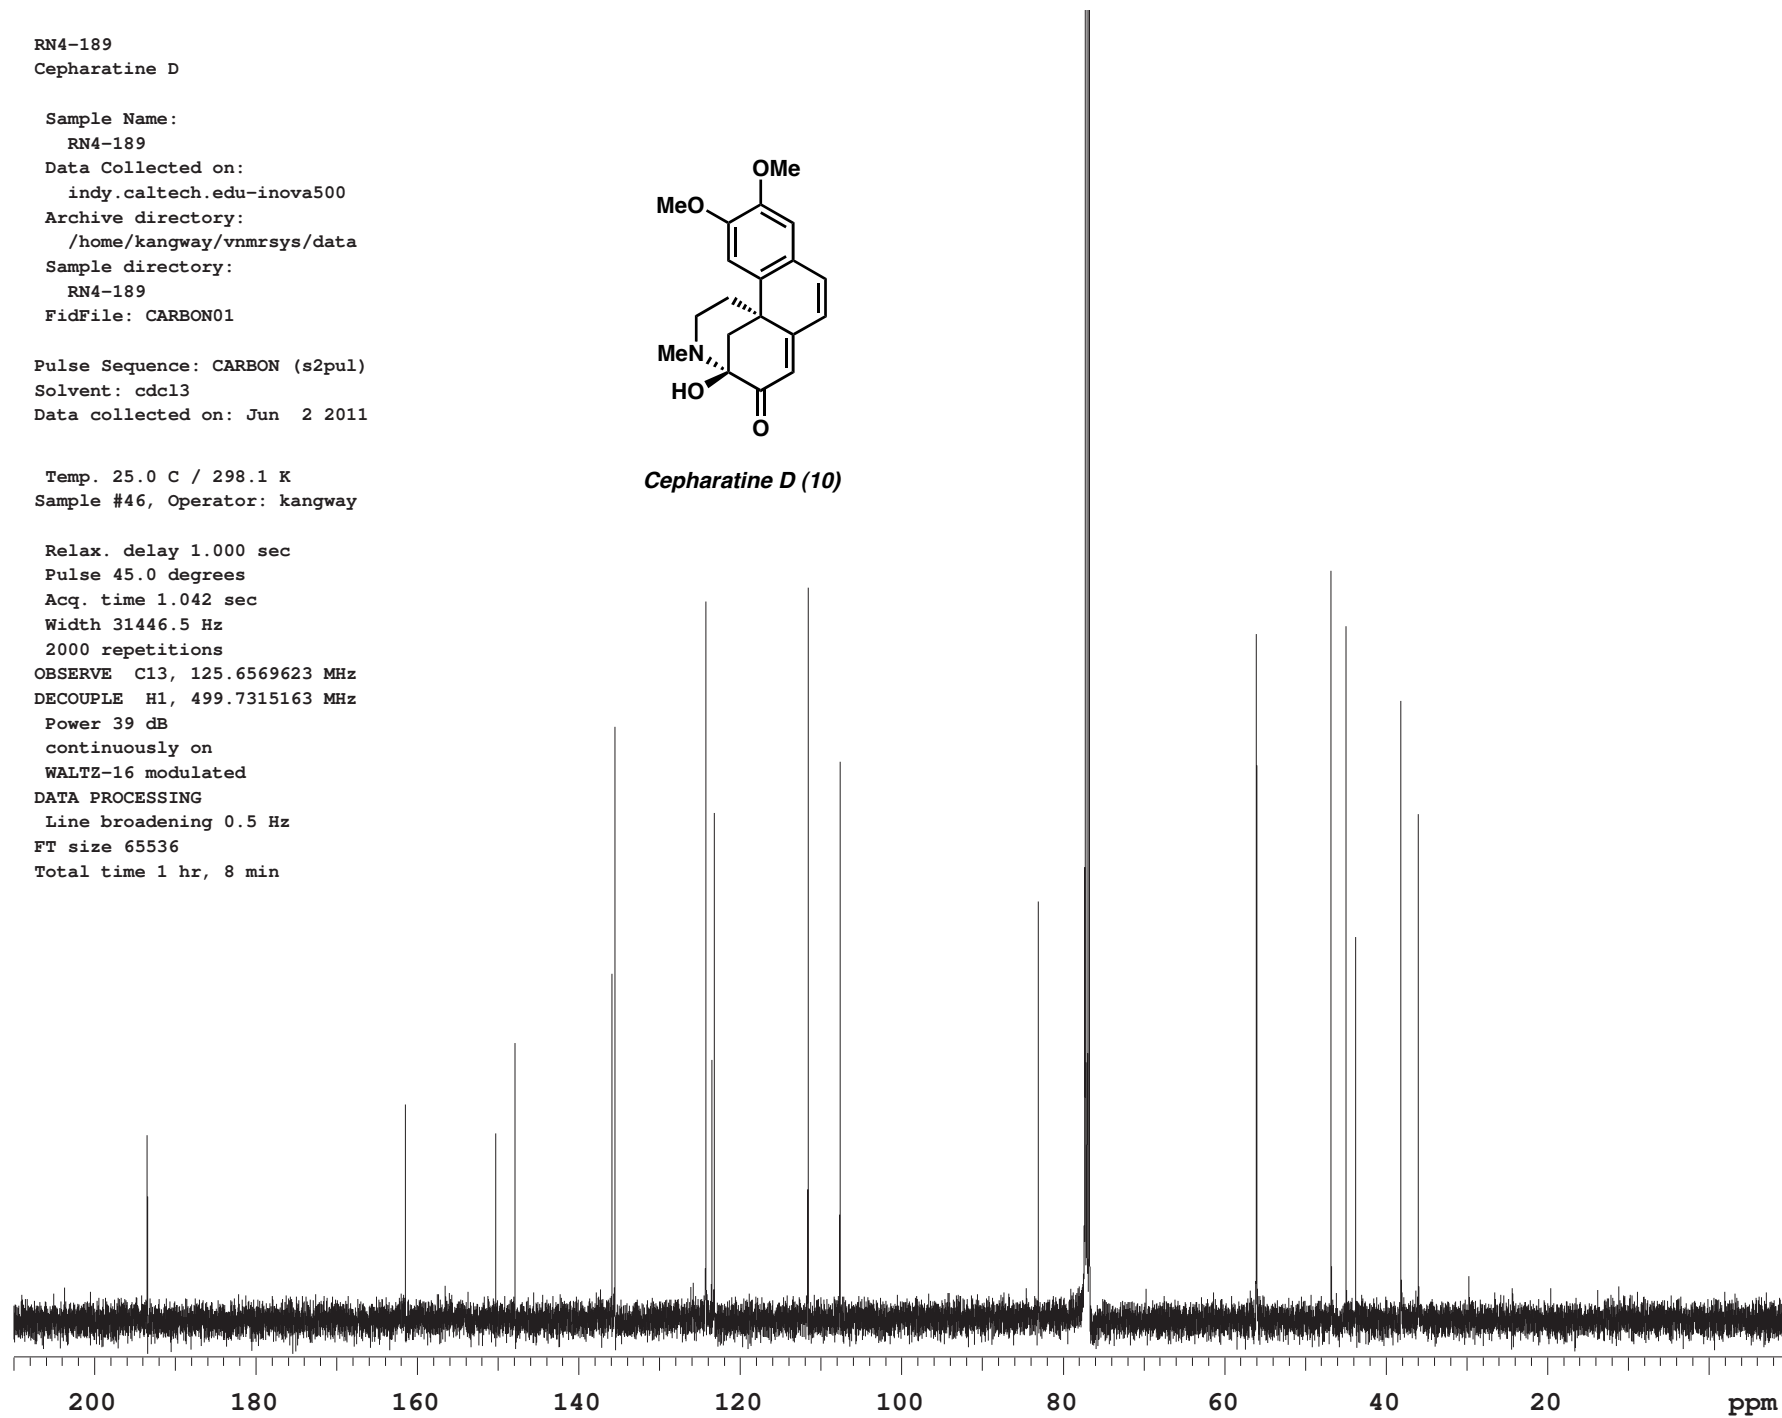

Archive directory: /export/home/vnmr1/vnmr3/data  
 Sample directory:  
 File: PROTON  
 Pulse Sequence: s2pu1

<sup>1</sup>H NMR Spectrum of Natural Cepharatine D (10)  
 Spectrum taken from L. He, Y.-H. Zhang, H.-Y. Guan, J.-X. Zhang,  
 Q.-Y. Sun, X.-J. Hao, *J. Nat. Prod.* 2011, 74, 181.

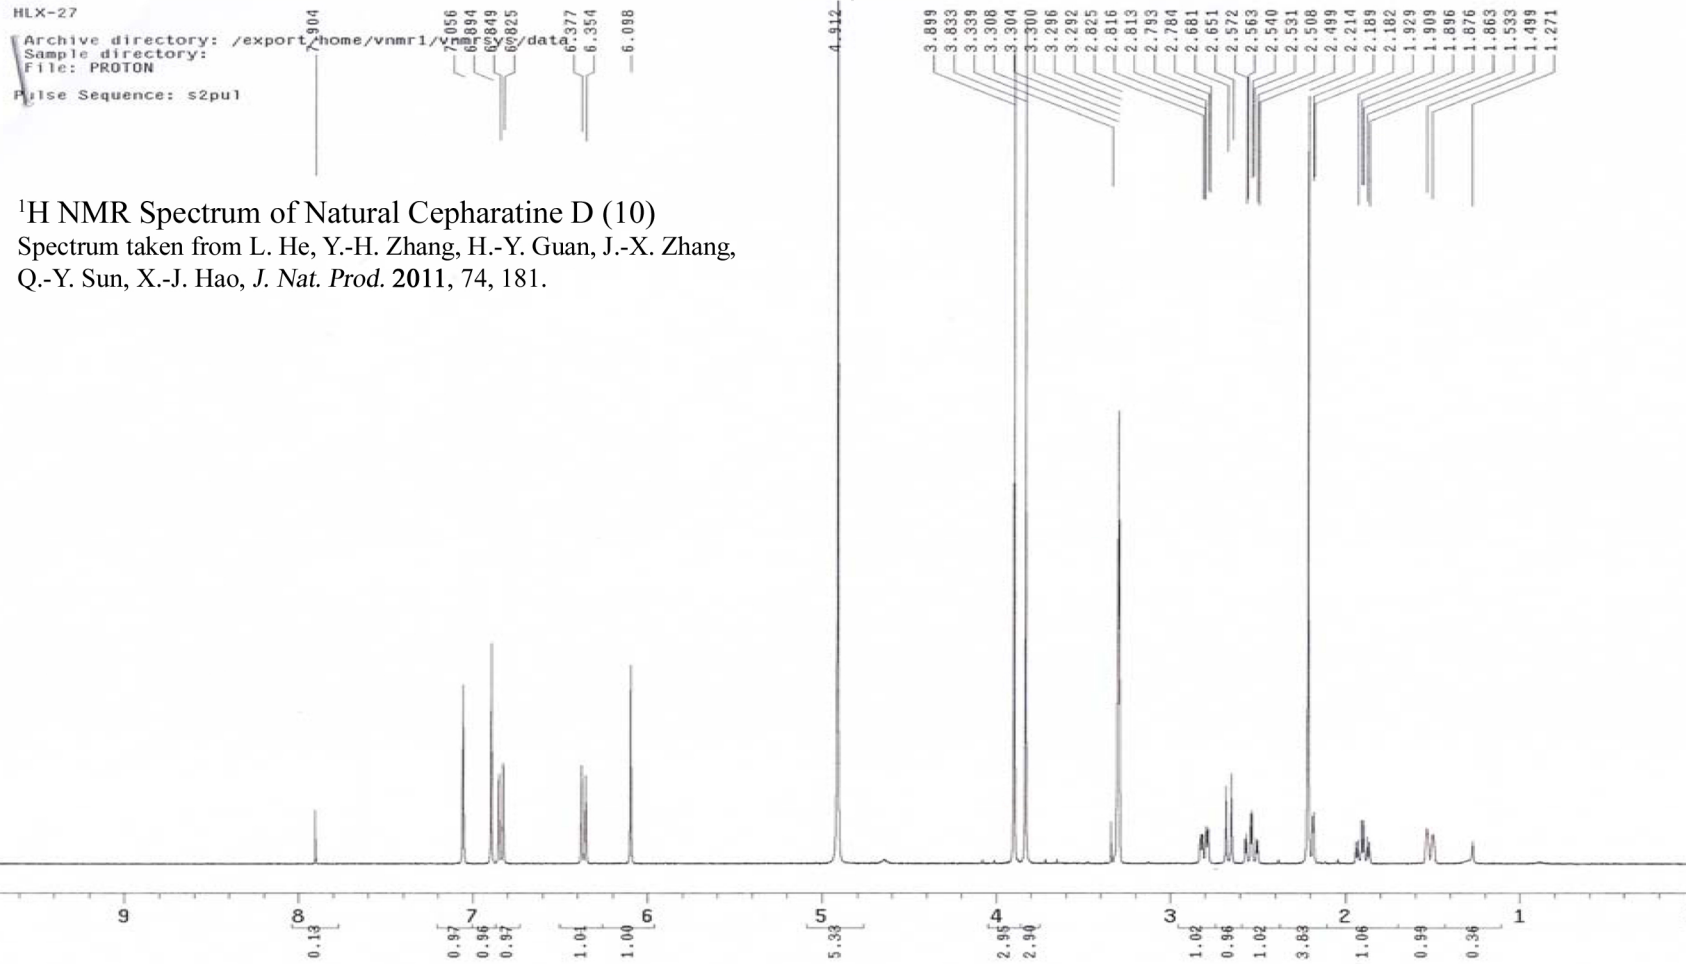

<sup>1</sup>H NMR Spectrum of Synthetic Cepharatine D (10)

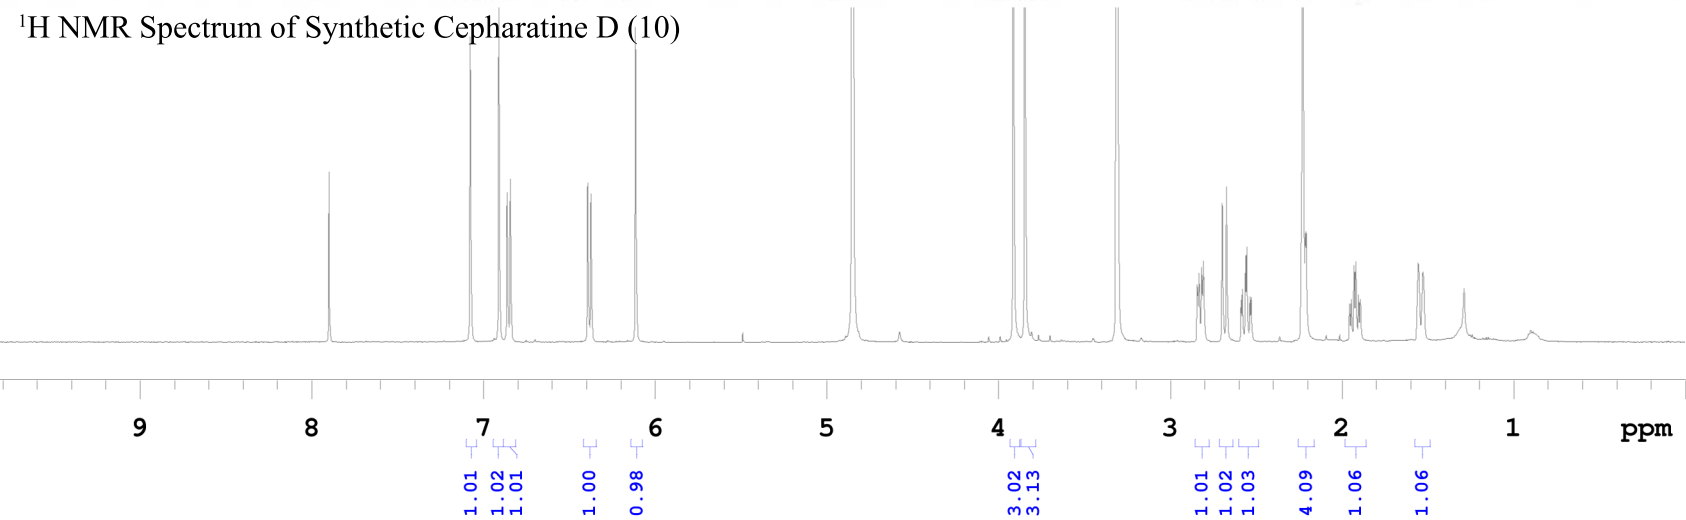

RN4-127

Sample Name:

RN4-127

Data Collected on:

indy.caltech.edu-inova500

Archive directory:

/home/kangway/vnmrsys/data

Sample directory:

RN4-127

FidFile: PROTON01

Pulse Sequence: PROTON (s2pul)

Solvent: cdcl3

Data collected on: Mar 20 2011

Temp. 25.0 C / 298.1 K

Sample #42, Operator: kangway

Relax. delay 5.000 sec

Pulse 45.0 degrees

Acq. time 2.500 sec

Width 8000.0 Hz

32 repetitions

OBSERVE H1, 499.7290200 MHz

DATA PROCESSING

Line broadening 0.2 Hz

FT size 65536

Total time 4 min 0 sec

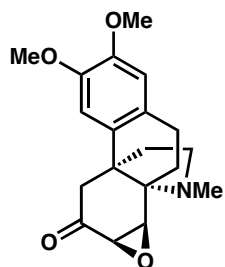

27

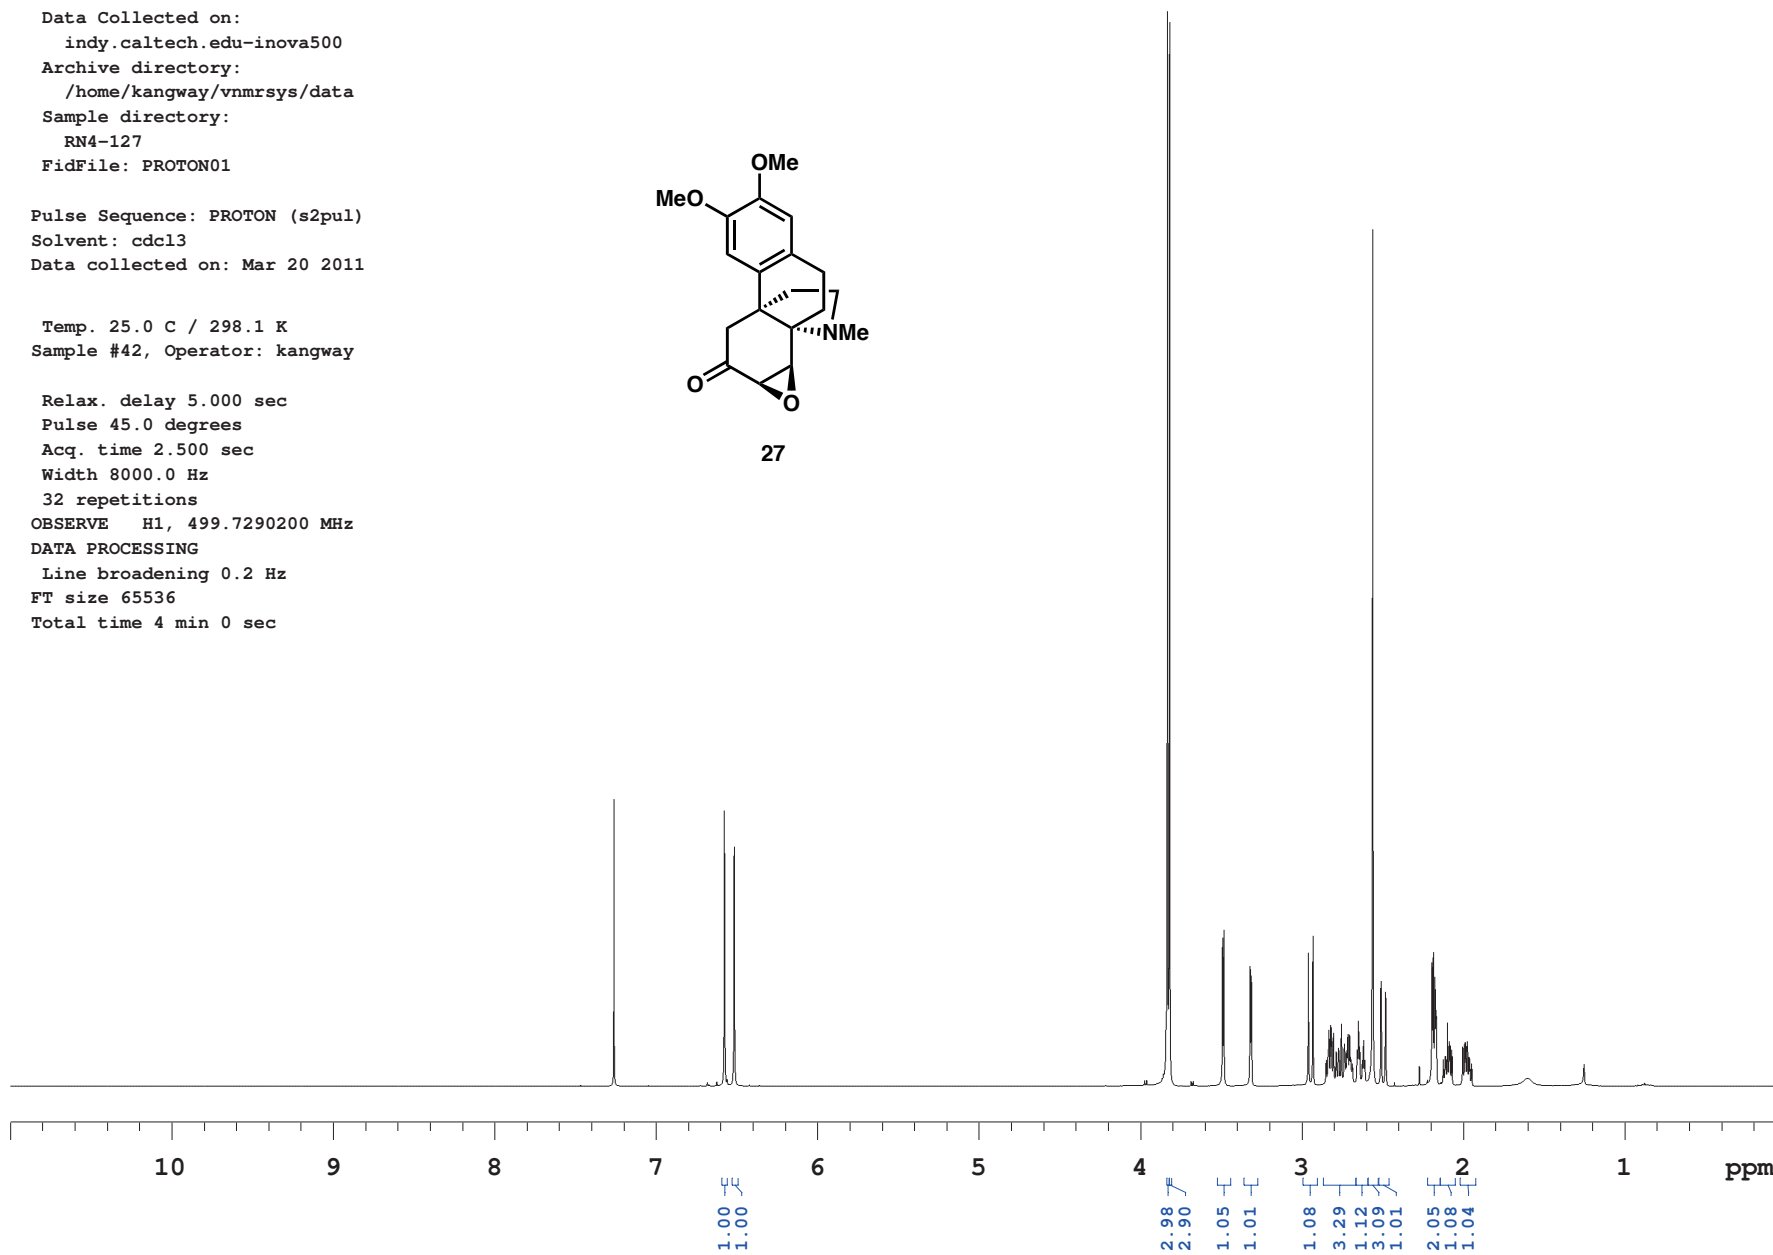

RN4-127

Sample Name:

RN4-127

Data Collected on:

indy.caltech.edu-inova500

Archive directory:

/home/kangway/vnmrsys/data

Sample directory:

RN4-127

FidFile: CARBON01

Pulse Sequence: CARBON (s2pul)

Solvent: cdcl3

Data collected on: Mar 20 2011

Temp. 25.0 C / 298.1 K

Sample #42, Operator: kangway

Relax. delay 1.000 sec

Pulse 45.0 degrees

Acq. time 1.042 sec

Width 31446.5 Hz

1500 repetitions

OBSERVE C13, 125.6569642 MHz

DECOUPLE H1, 499.7315163 MHz

Power 39 dB

continuously on

WALTZ-16 modulated

DATA PROCESSING

Line broadening 0.5 Hz

FT size 65536

Total time 51 min

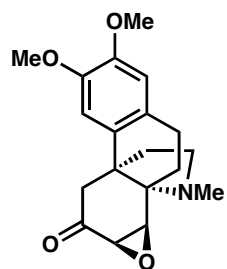

27

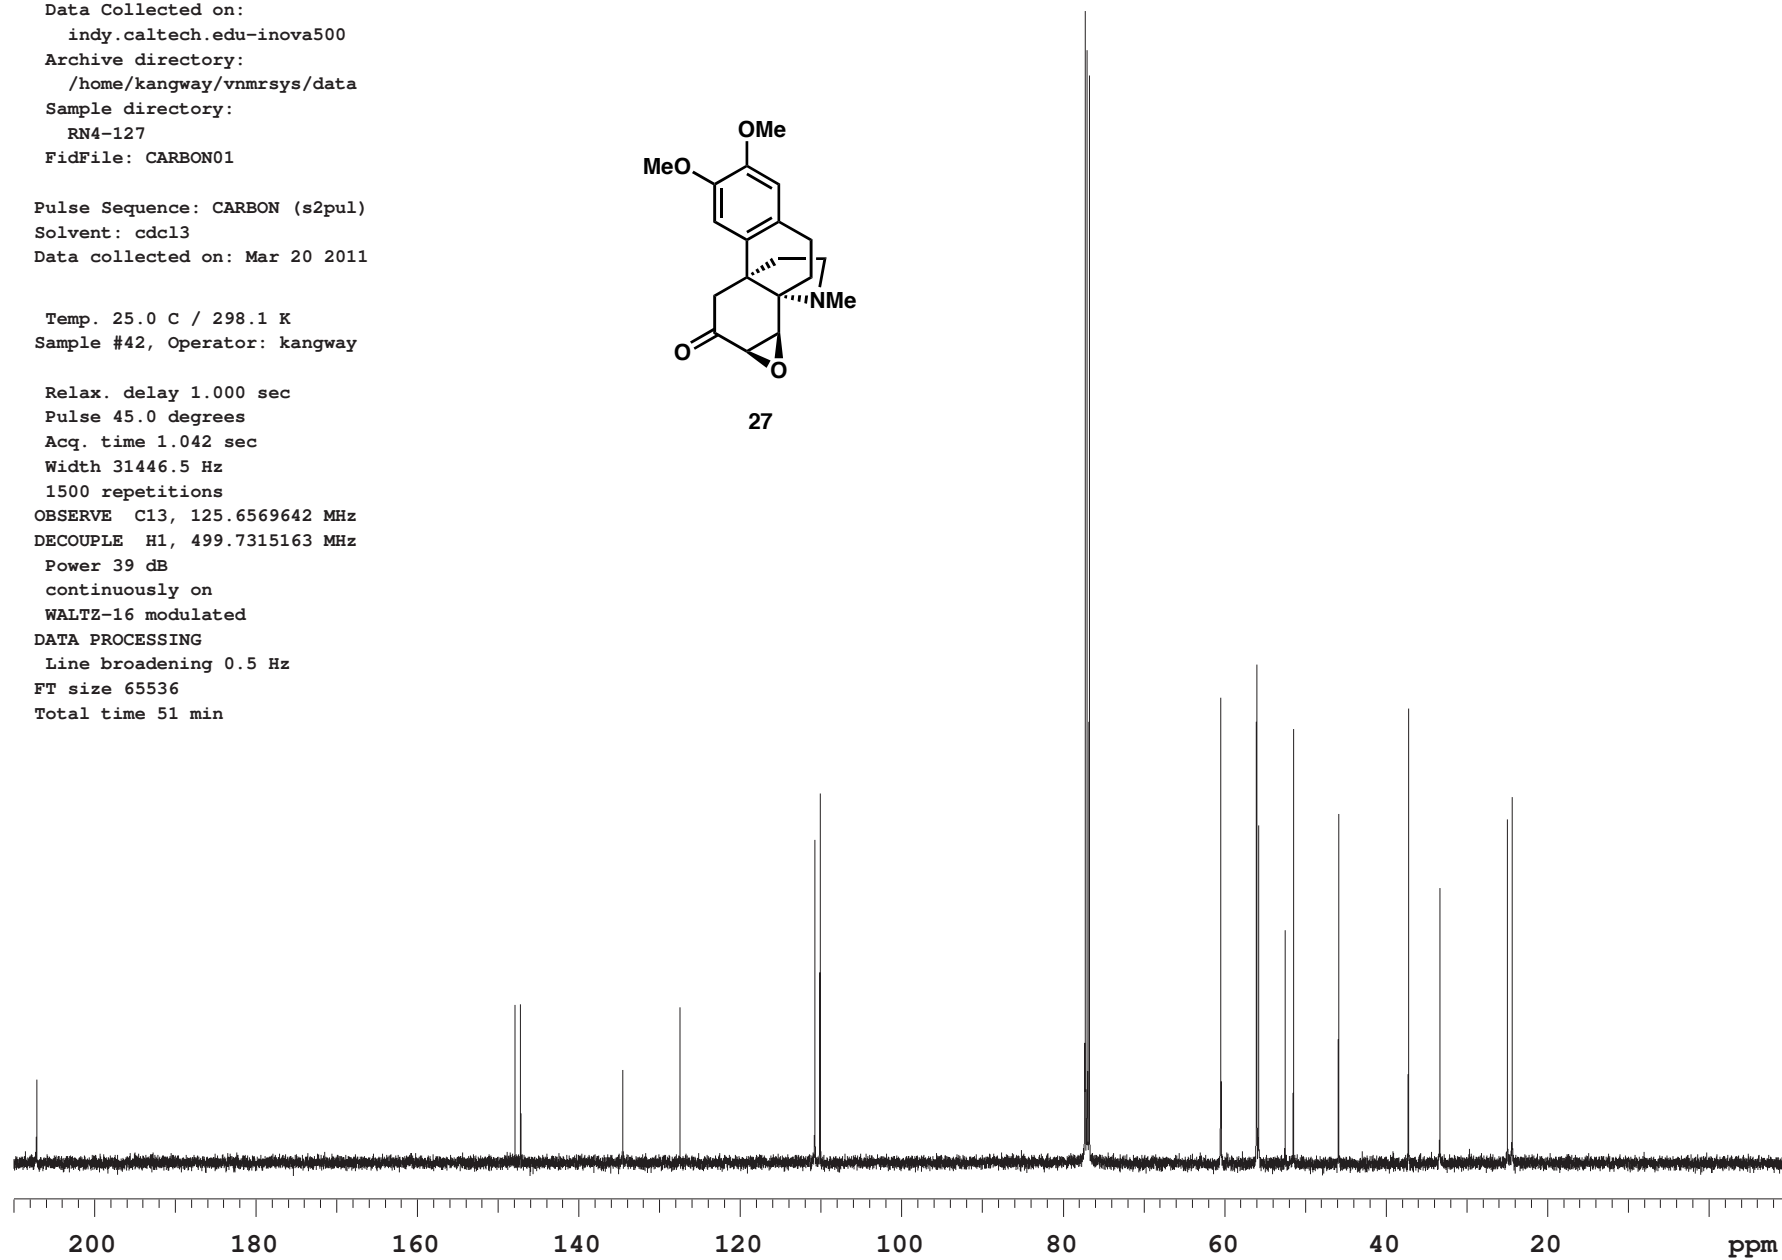

RN4-142

Sample Name:

RN4-142

Data Collected on:

indy.caltech.edu-inova500

Archive directory:

/home/kangway/vnmrsys/data

Sample directory:

RN4-142

FidFile: PROTON02

Pulse Sequence: PROTON (s2pul)

Solvent: cdc13

Data collected on: Apr 3 2011

Temp. 25.0 C / 298.1 K

Sample #33, Operator: kangway

Relax. delay 5.000 sec

Pulse 45.0 degrees

Acq. time 2.500 sec

Width 8000.0 Hz

32 repetitions

OBSERVE H1, 499.7290203 MHz

DATA PROCESSING

FT size 65536

Total time 4 min 0 sec

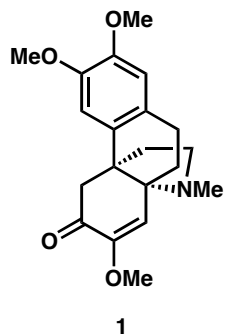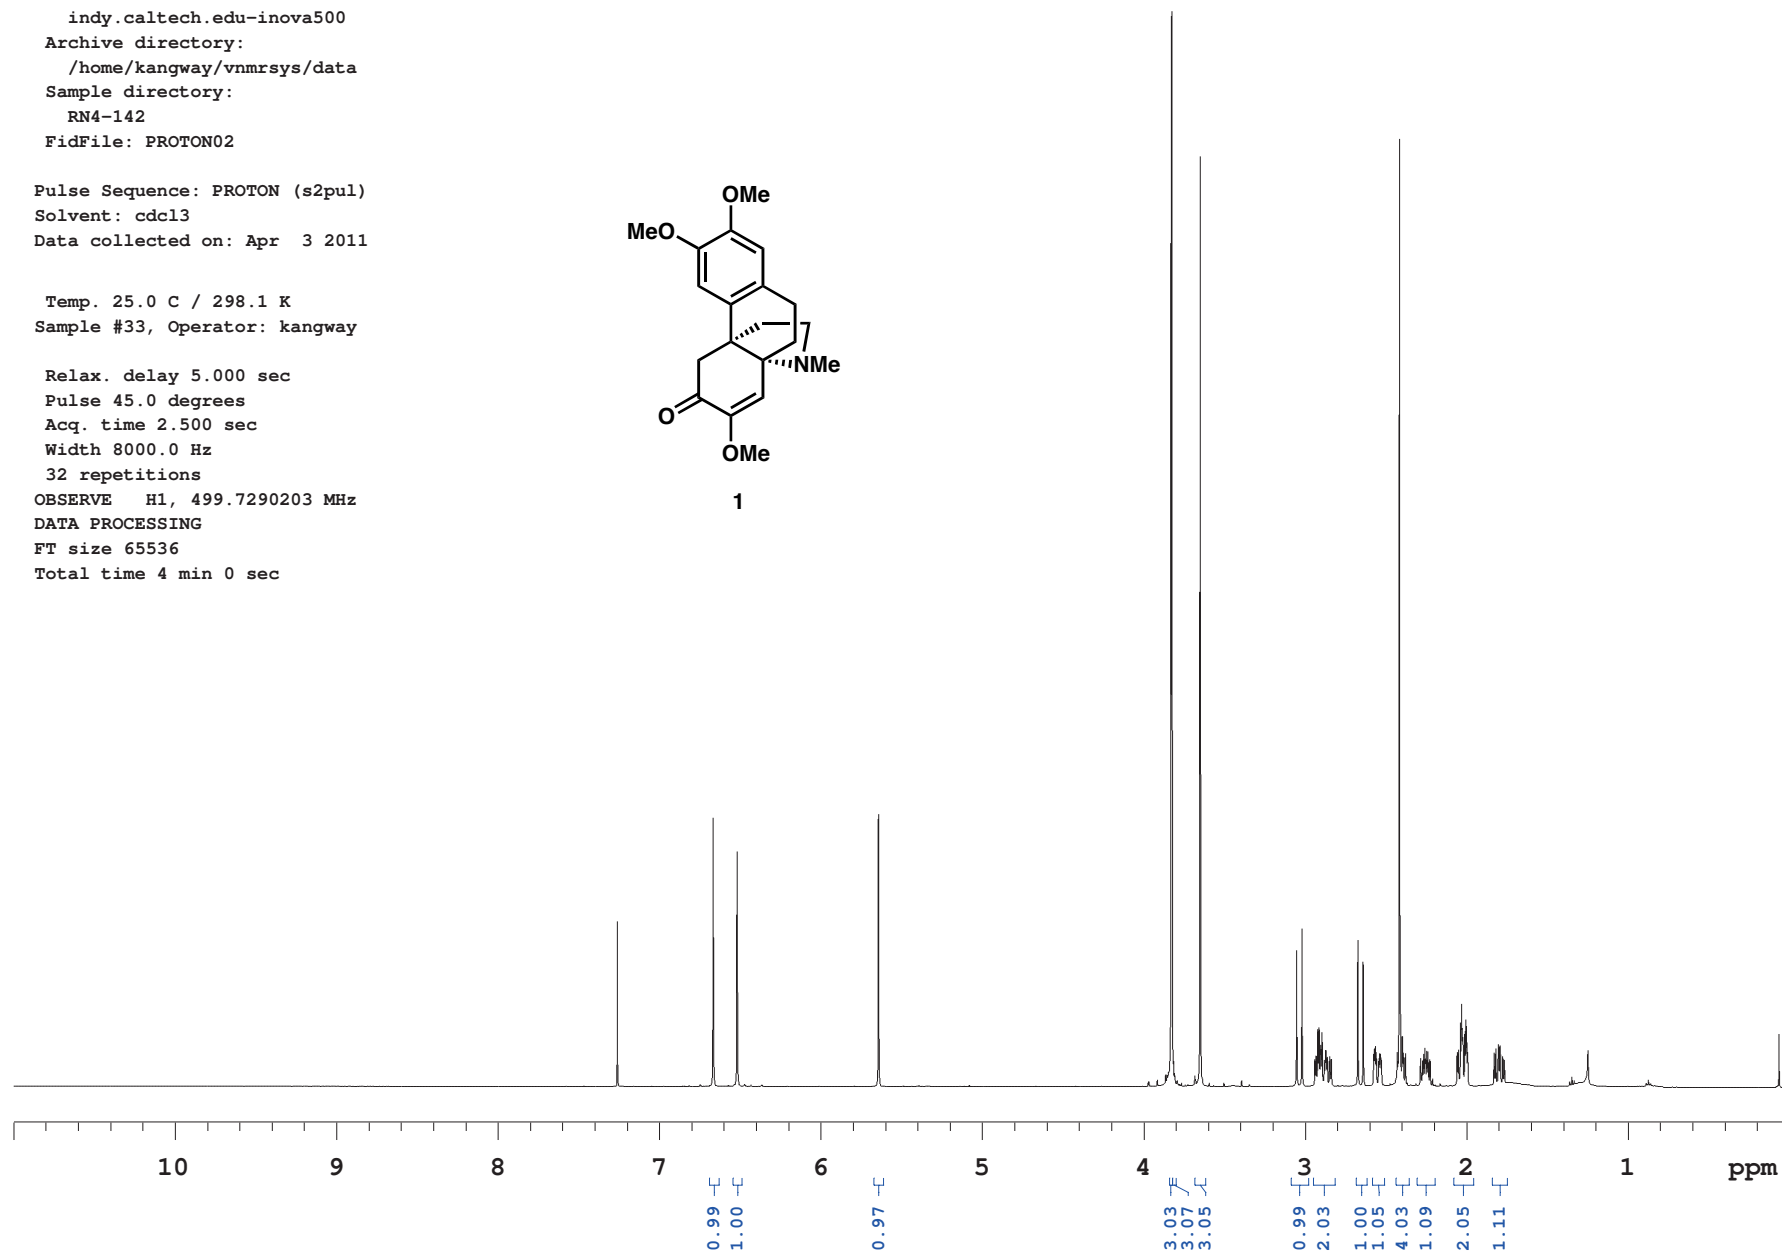



RN4-142

Sample Name:

RN4-142

Data Collected on:

indy.caltech.edu-inova500

Archive directory:

/home/kangway/vnmrsys/data

Sample directory:

RN4-142

FidFile: CARBON01

Pulse Sequence: CARBON (s2pul)

Solvent: cdc13

Data collected on: Apr 3 2011

Temp. 25.0 C / 298.1 K

Sample #33, Operator: kangway

Relax. delay 1.000 sec

Pulse 45.0 degrees

Acq. time 1.042 sec

Width 31446.5 Hz

1500 repetitions

OBSERVE C13, 125.6569652 MHz

DECOUPLE H1, 499.7315163 MHz

Power 39 dB

continuously on

WALTZ-16 modulated

DATA PROCESSING

Line broadening 0.5 Hz

FT size 65536

Total time 51 min

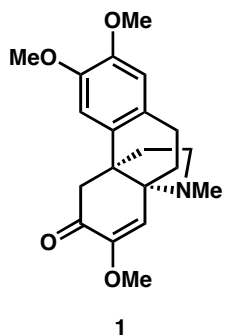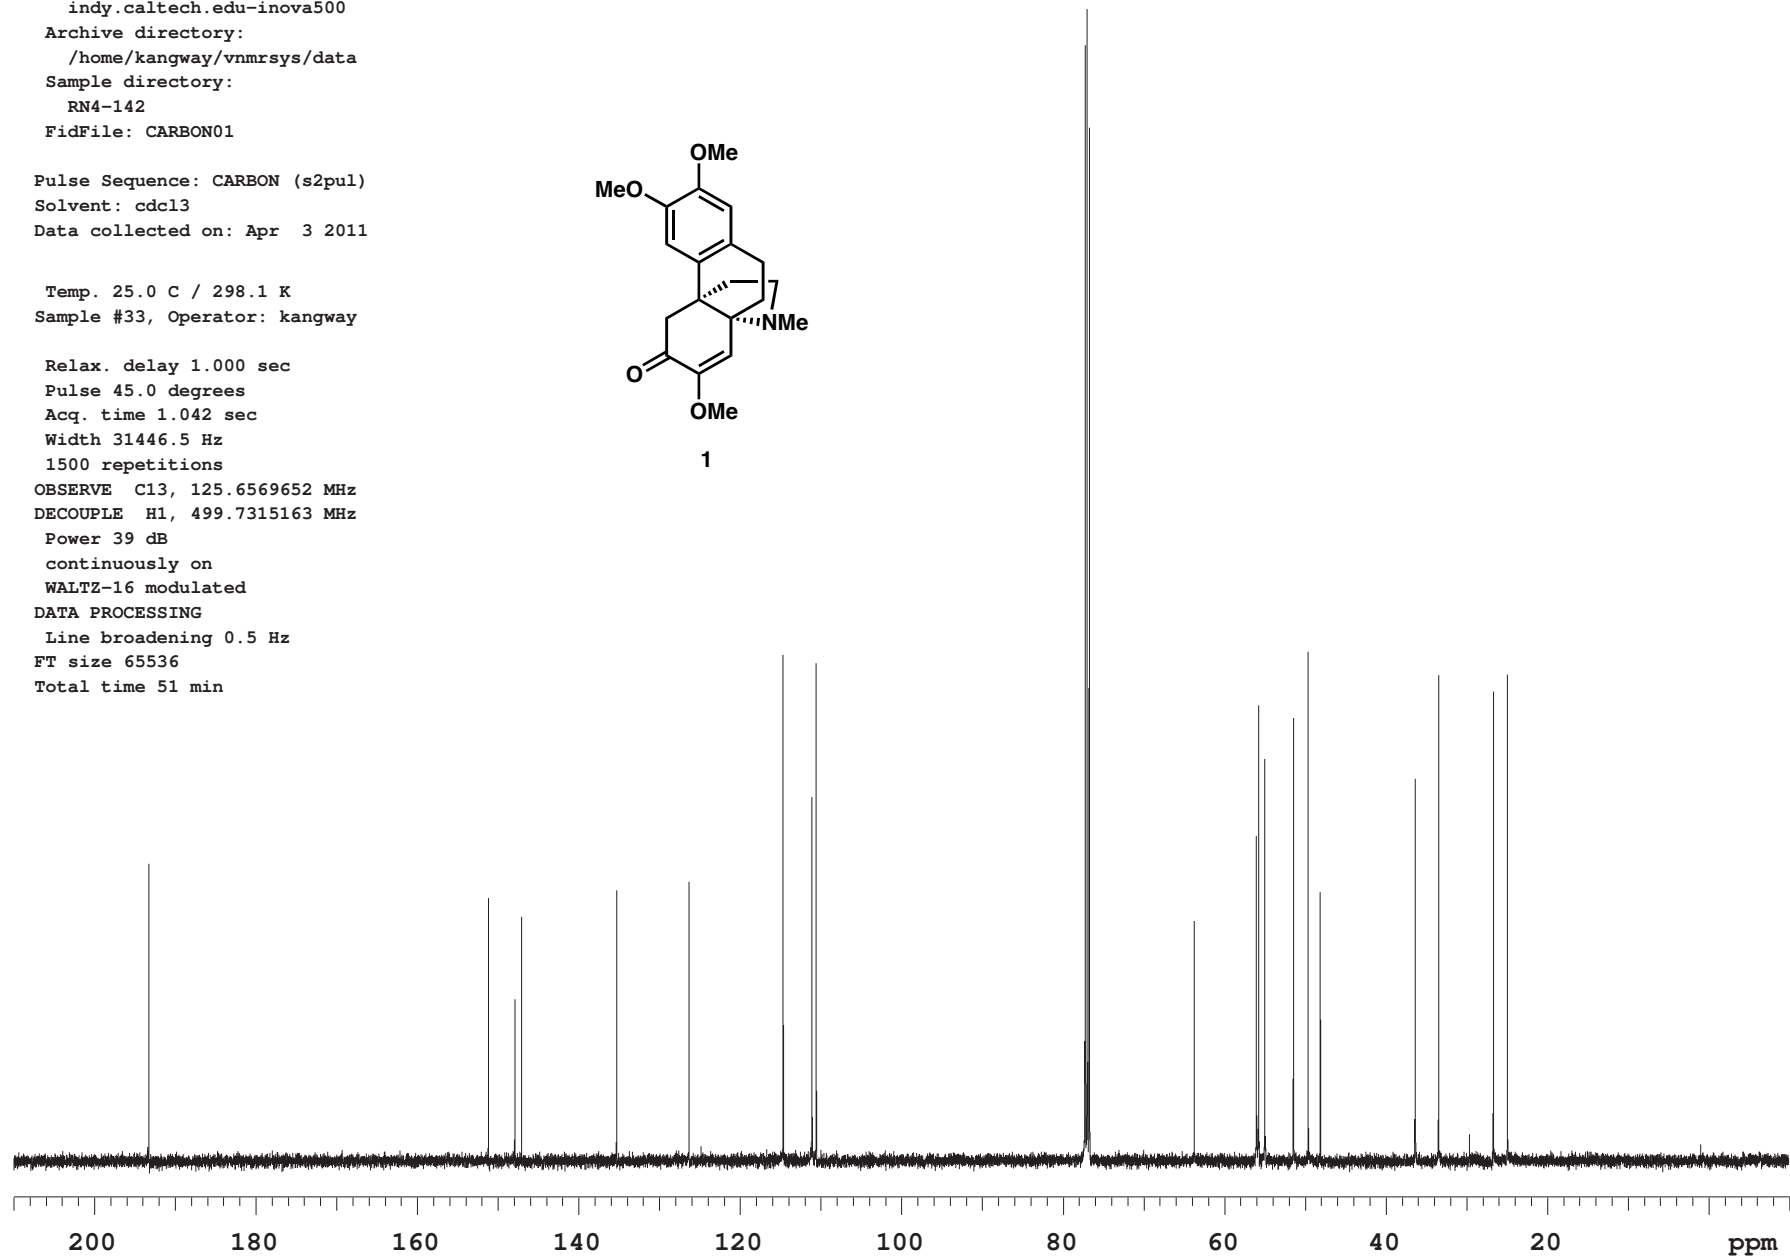

KVC6-089

Sample Name:

KVC6-089

Data Collected on:

indy.caltech.edu-inova500

Archive directory:

/home/kangway/vnmrsys/data

Sample directory:

KVC6-089

FidFile: PROTON02

Pulse Sequence: PROTON (s2pul)

Solvent: cdc13

Data collected on: Nov 7 2010

Temp. 25.0 C / 298.1 K

Sample #36, Operator: kangway

Relax. delay 5.000 sec

Pulse 45.0 degrees

Acq. time 2.500 sec

Width 8000.0 Hz

32 repetitions

OBSERVE H1, 499.7420505 MHz

DATA PROCESSING

FT size 65536

Total time 4 min 0 sec

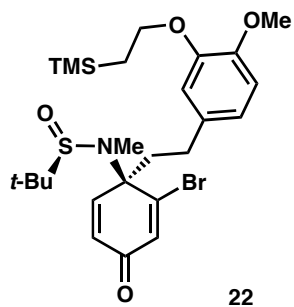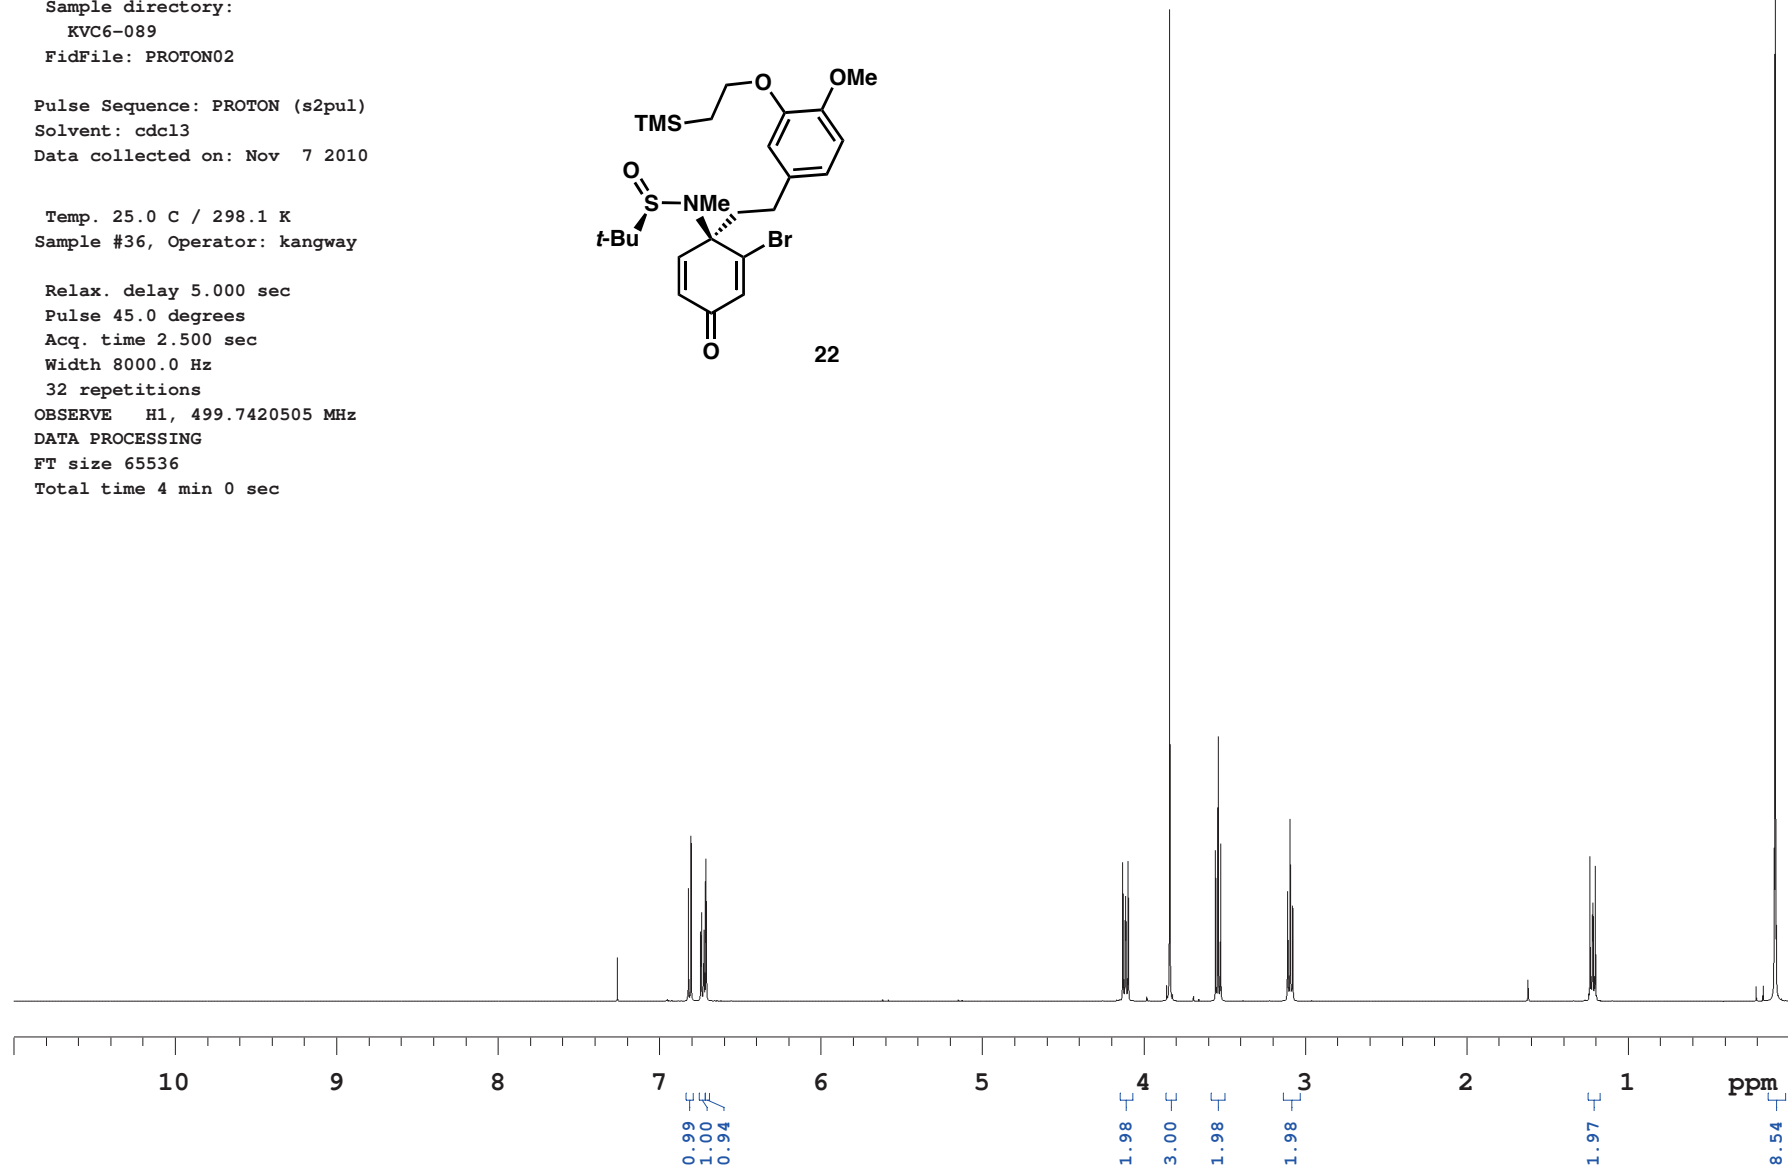

KVC6-089

Sample Name:

KVC6-089

Data Collected on:

indy.caltech.edu-inova500

Archive directory:

/home/kangway/vnmrsys/data

Sample directory:

KVC6-089

FidFile: CARBON01

Pulse Sequence: CARBON (s2pul)

Solvent: cdc13

Data collected on: Nov 7 2010

Temp. 25.0 C / 298.1 K

Sample #36, Operator: kangway

Relax. delay 1.000 sec

Pulse 45.0 degrees

Acq. time 1.042 sec

Width 31446.5 Hz

1000 repetitions

OBSERVE C13, 125.6602471 MHz

DECOUPLE H1, 499.7445450 MHz

Power 39 dB

continuously on

WALTZ-16 modulated

DATA PROCESSING

Line broadening 0.5 Hz

FT size 65536

Total time 34 min

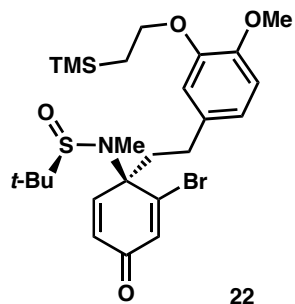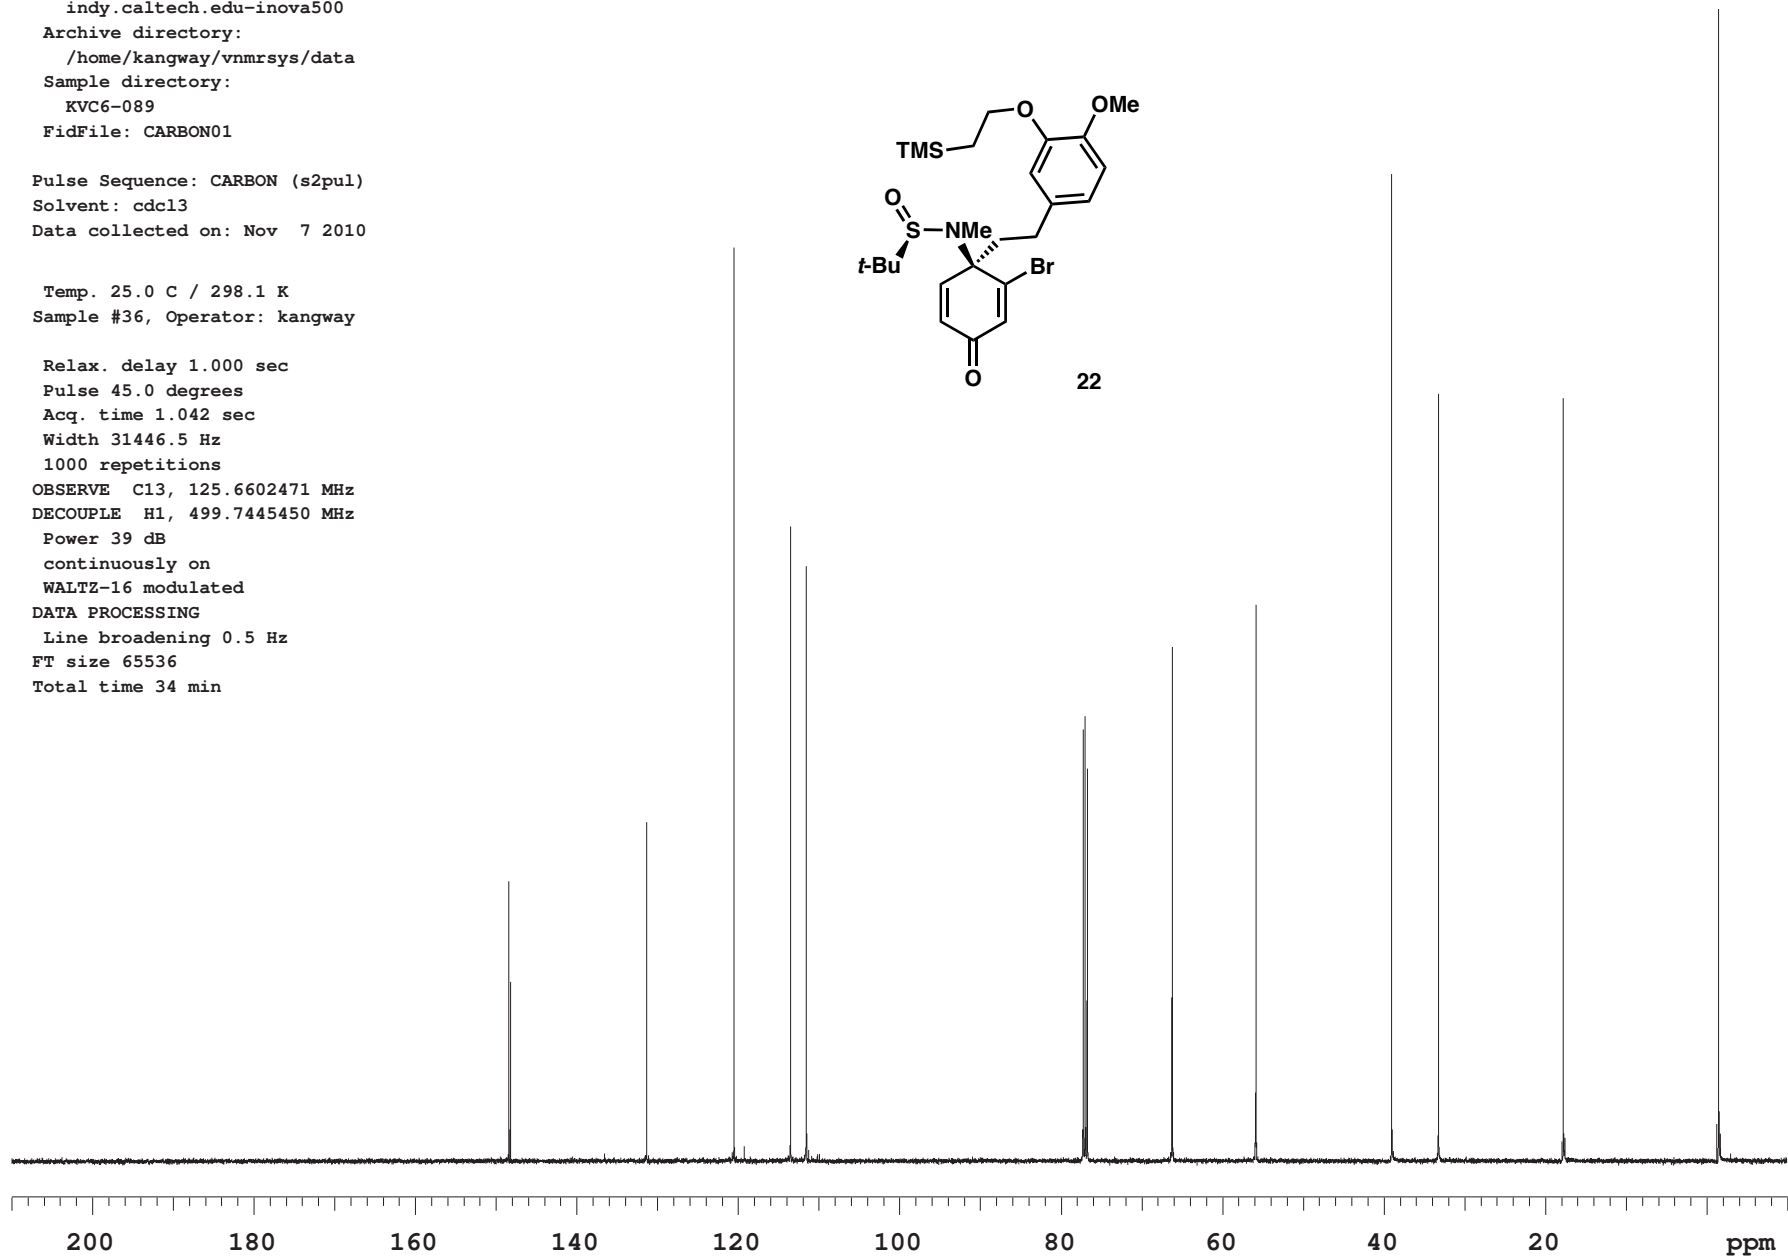

KVC8-033

Sample Name:

KVC8-033

Data Collected on:

indy.caltech.edu-inova500

Archive directory:

/home/kangway/vnmrsys/data

Sample directory:

KVC8-033

FidFile: PROTON01

Pulse Sequence: PROTON (s2pul)

Solvent: cdc13

Data collected on: Mar 3 2011

Temp. 25.0 C / 298.1 K

Sample #41, Operator: kangway

Relax. delay 5.000 sec

Pulse 45.0 degrees

Acq. time 2.500 sec

Width 8000.0 Hz

32 repetitions

OBSERVE H1, 499.7290203 MHz

DATA PROCESSING

Line broadening 0.2 Hz

FT size 65536

Total time 4 min 0 sec

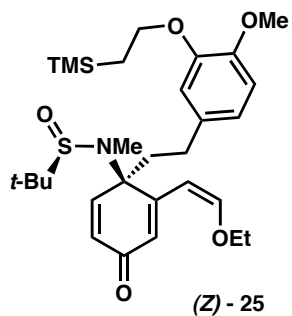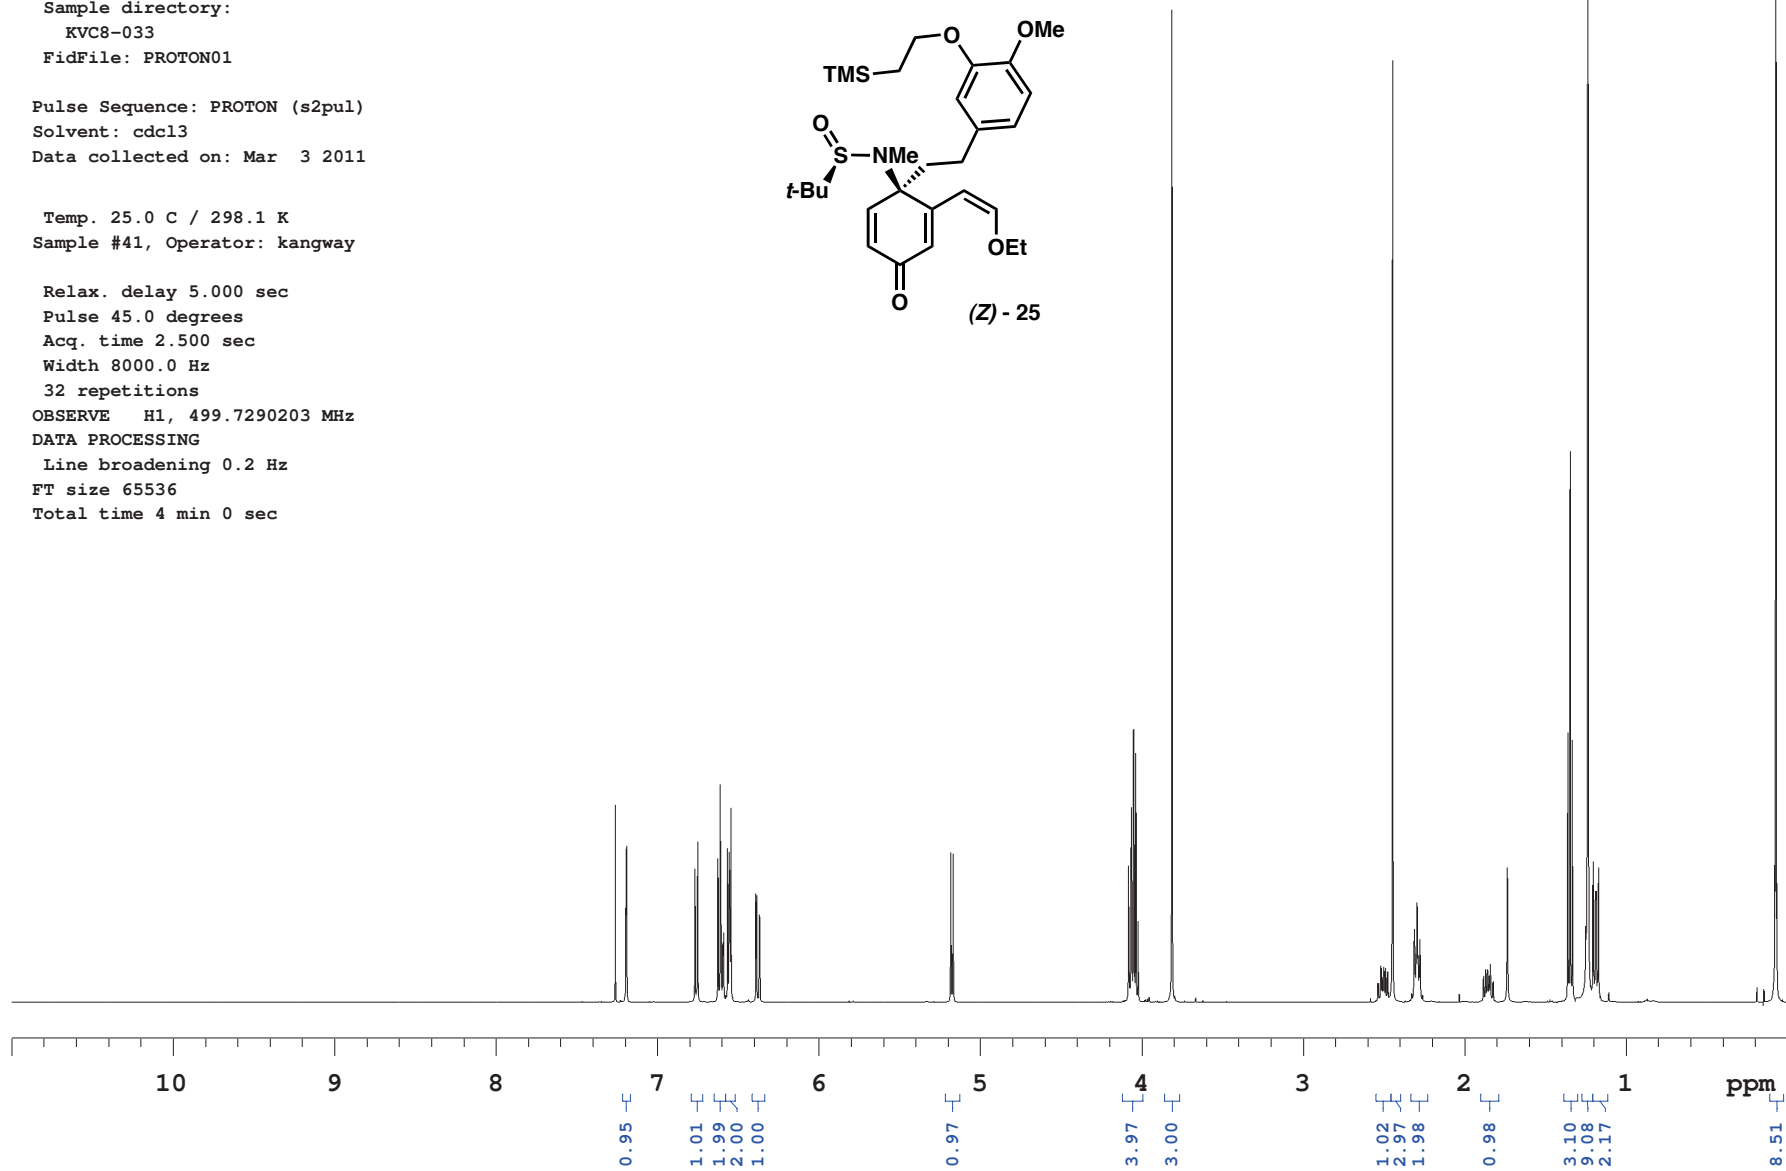

KVC8-033

Sample Name:

KVC8-033

Data Collected on:

indy.caltech.edu-inova500

Archive directory:

/home/kangway/vnmrsys/data

Sample directory:

KVC8-033

FidFile: CARBON01

Pulse Sequence: CARBON (s2pul)

Solvent: cdcl3

Data collected on: Mar 3 2011

Temp. 25.0 C / 298.1 K

Sample #41, Operator: kangway

Relax. delay 1.000 sec

Pulse 45.0 degrees

Acq. time 1.042 sec

Width 31446.5 Hz

256 repetitions

OBSERVE C13, 125.6569652 MHz

DECOUPLE H1, 499.7315163 MHz

Power 39 dB

continuously on

WALTZ-16 modulated

DATA PROCESSING

Line broadening 0.5 Hz

FT size 65536

Total time 34 min

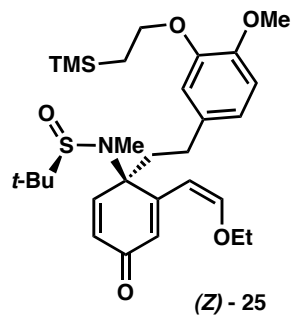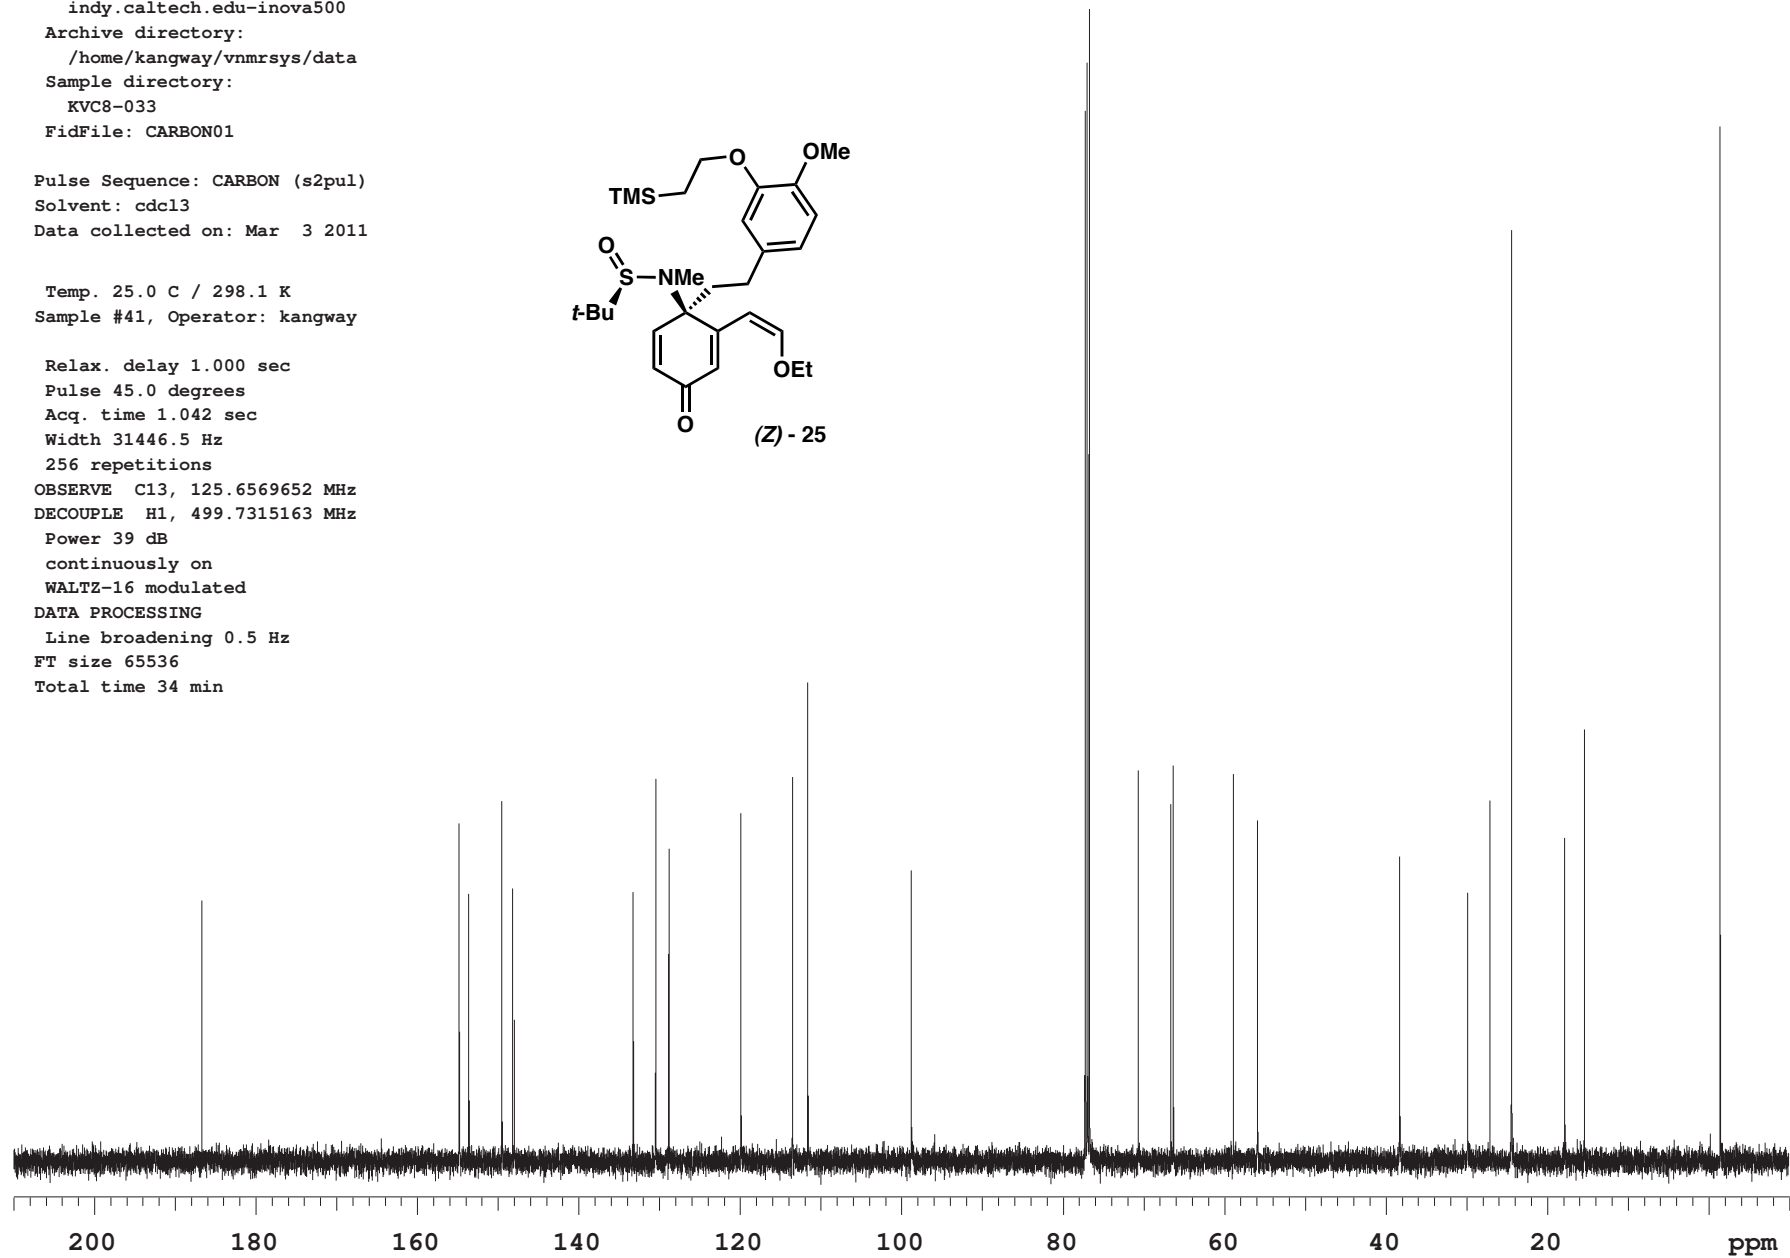

KVC8-089-E

Sample Name:

KVC8-089-E

Data Collected on:

indy.caltech.edu-inova500

Archive directory:

/home/kangway/vnmrsys/data

Sample directory:

KVC8-089-E

FidFile: PROTON01

Pulse Sequence: PROTON (s2pul)

Solvent: cdc13

Data collected on: Mar 21 2011

Temp. 25.0 C / 298.1 K

Sample #34, Operator: kangway

Relax. delay 5.000 sec

Pulse 45.0 degrees

Acq. time 2.500 sec

Width 8000.0 Hz

32 repetitions

OBSERVE H1, 499.7290200 MHz

DATA PROCESSING

FT size 65536

Total time 4 min 0 sec

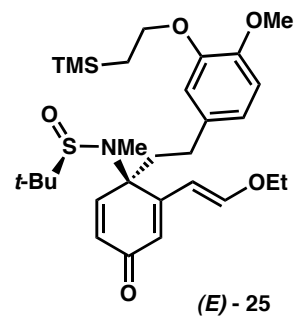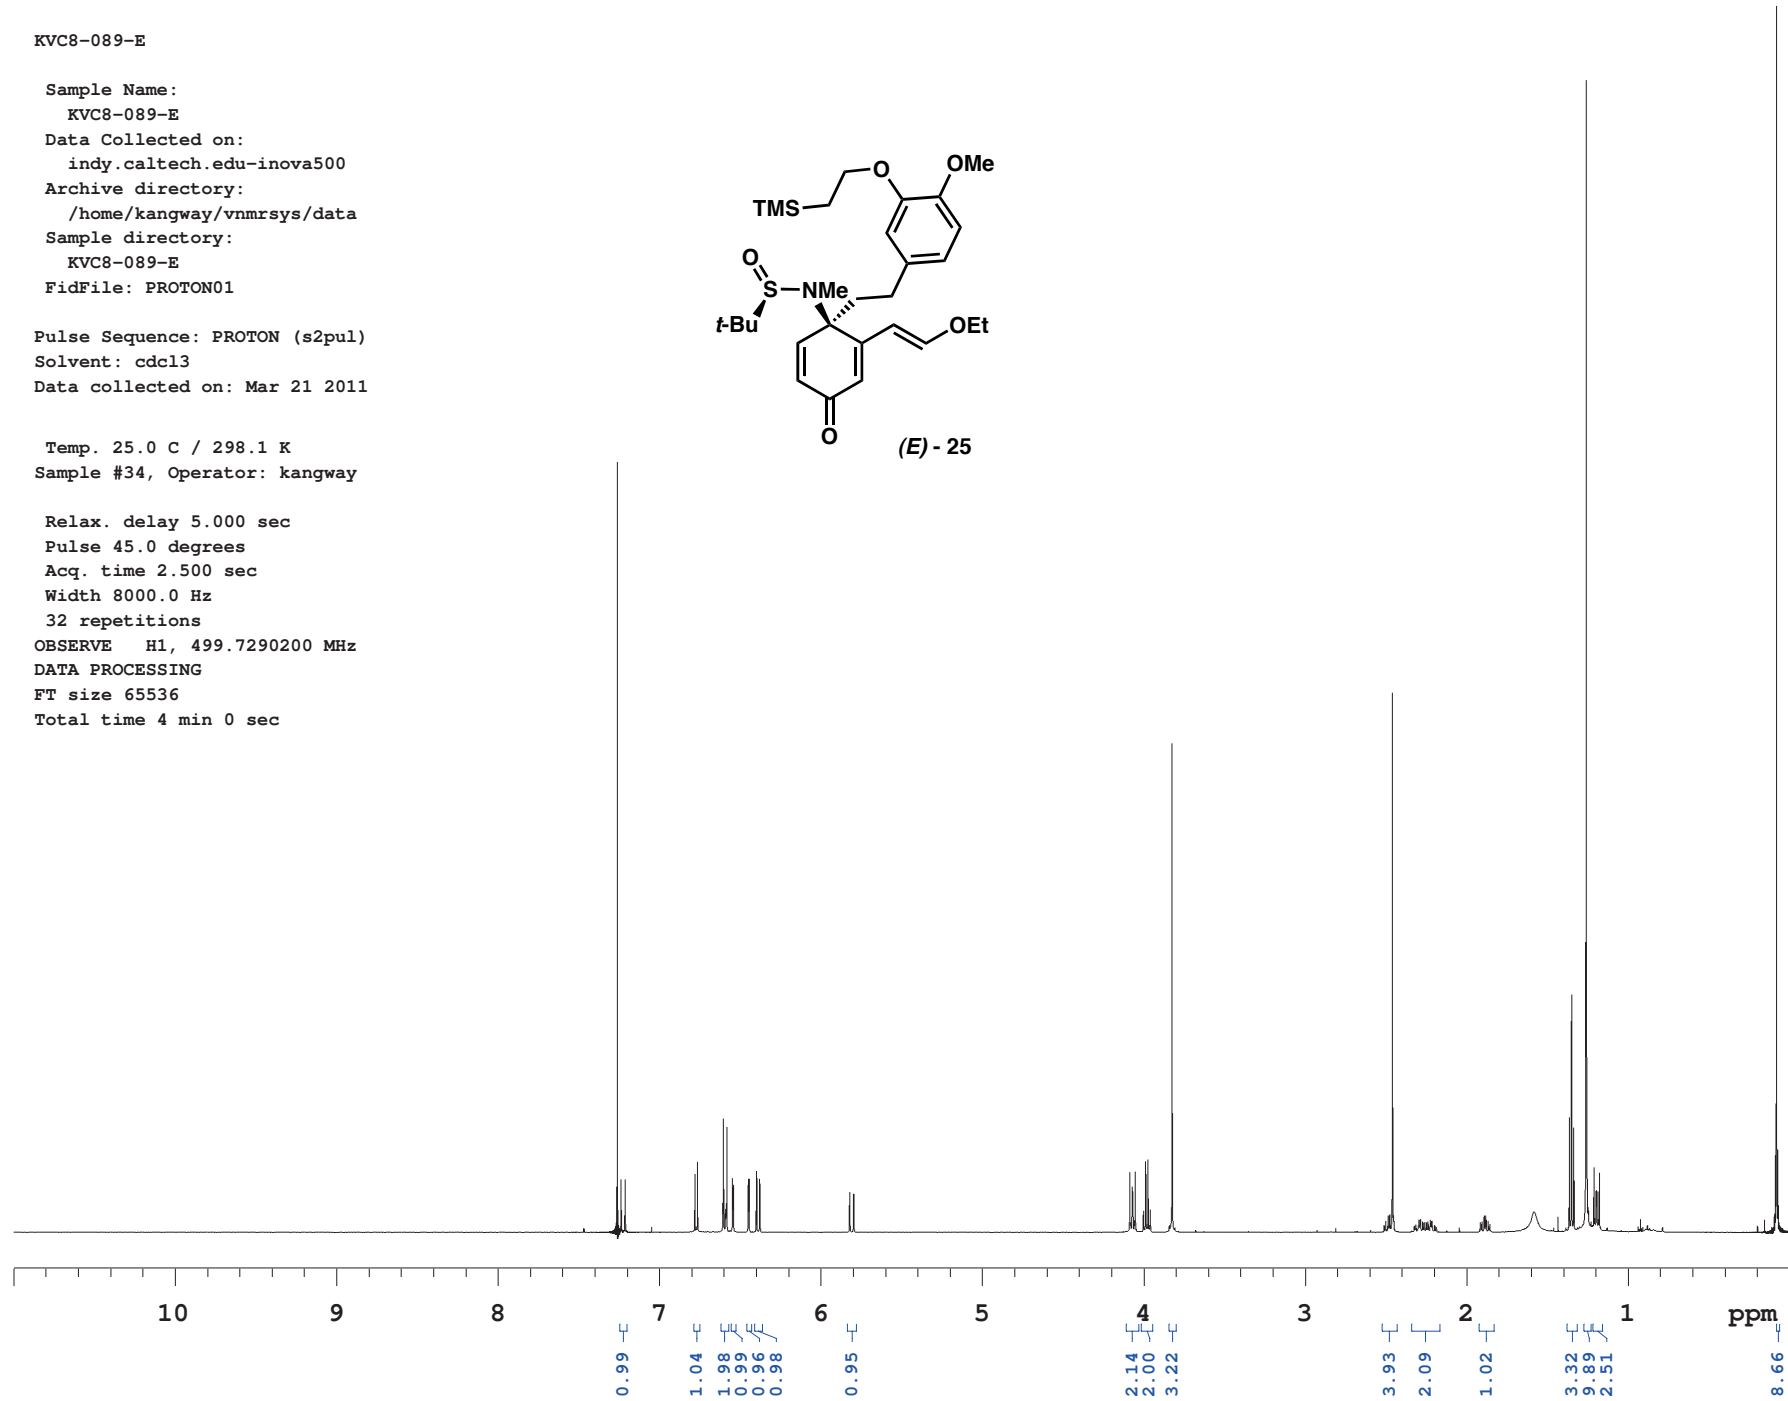

KVC8-089-E

Sample Name:

KVC8-089-E

Data Collected on:

indy.caltech.edu-inova500

Archive directory:

/home/kangway/vnmrsys/data

Sample directory:

KVC8-089-E

FidFile: CARBON01

Pulse Sequence: CARBON (s2pul)

Solvent: cdcl3

Data collected on: Mar 21 2011

Temp. 25.0 C / 298.1 K

Sample #34, Operator: kangway

Relax. delay 1.000 sec

Pulse 45.0 degrees

Acq. time 1.042 sec

Width 31446.5 Hz

5000 repetitions

OBSERVE C13, 125.6569614 MHz

DECOUPLE H1, 499.7315163 MHz

Power 39 dB

continuously on

WALTZ-16 modulated

DATA PROCESSING

Line broadening 0.5 Hz

FT size 65536

Total time 2 hr, 50 min

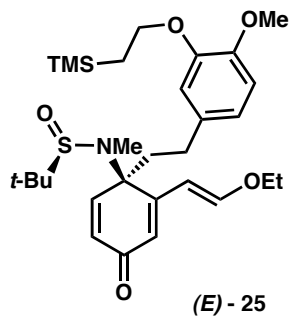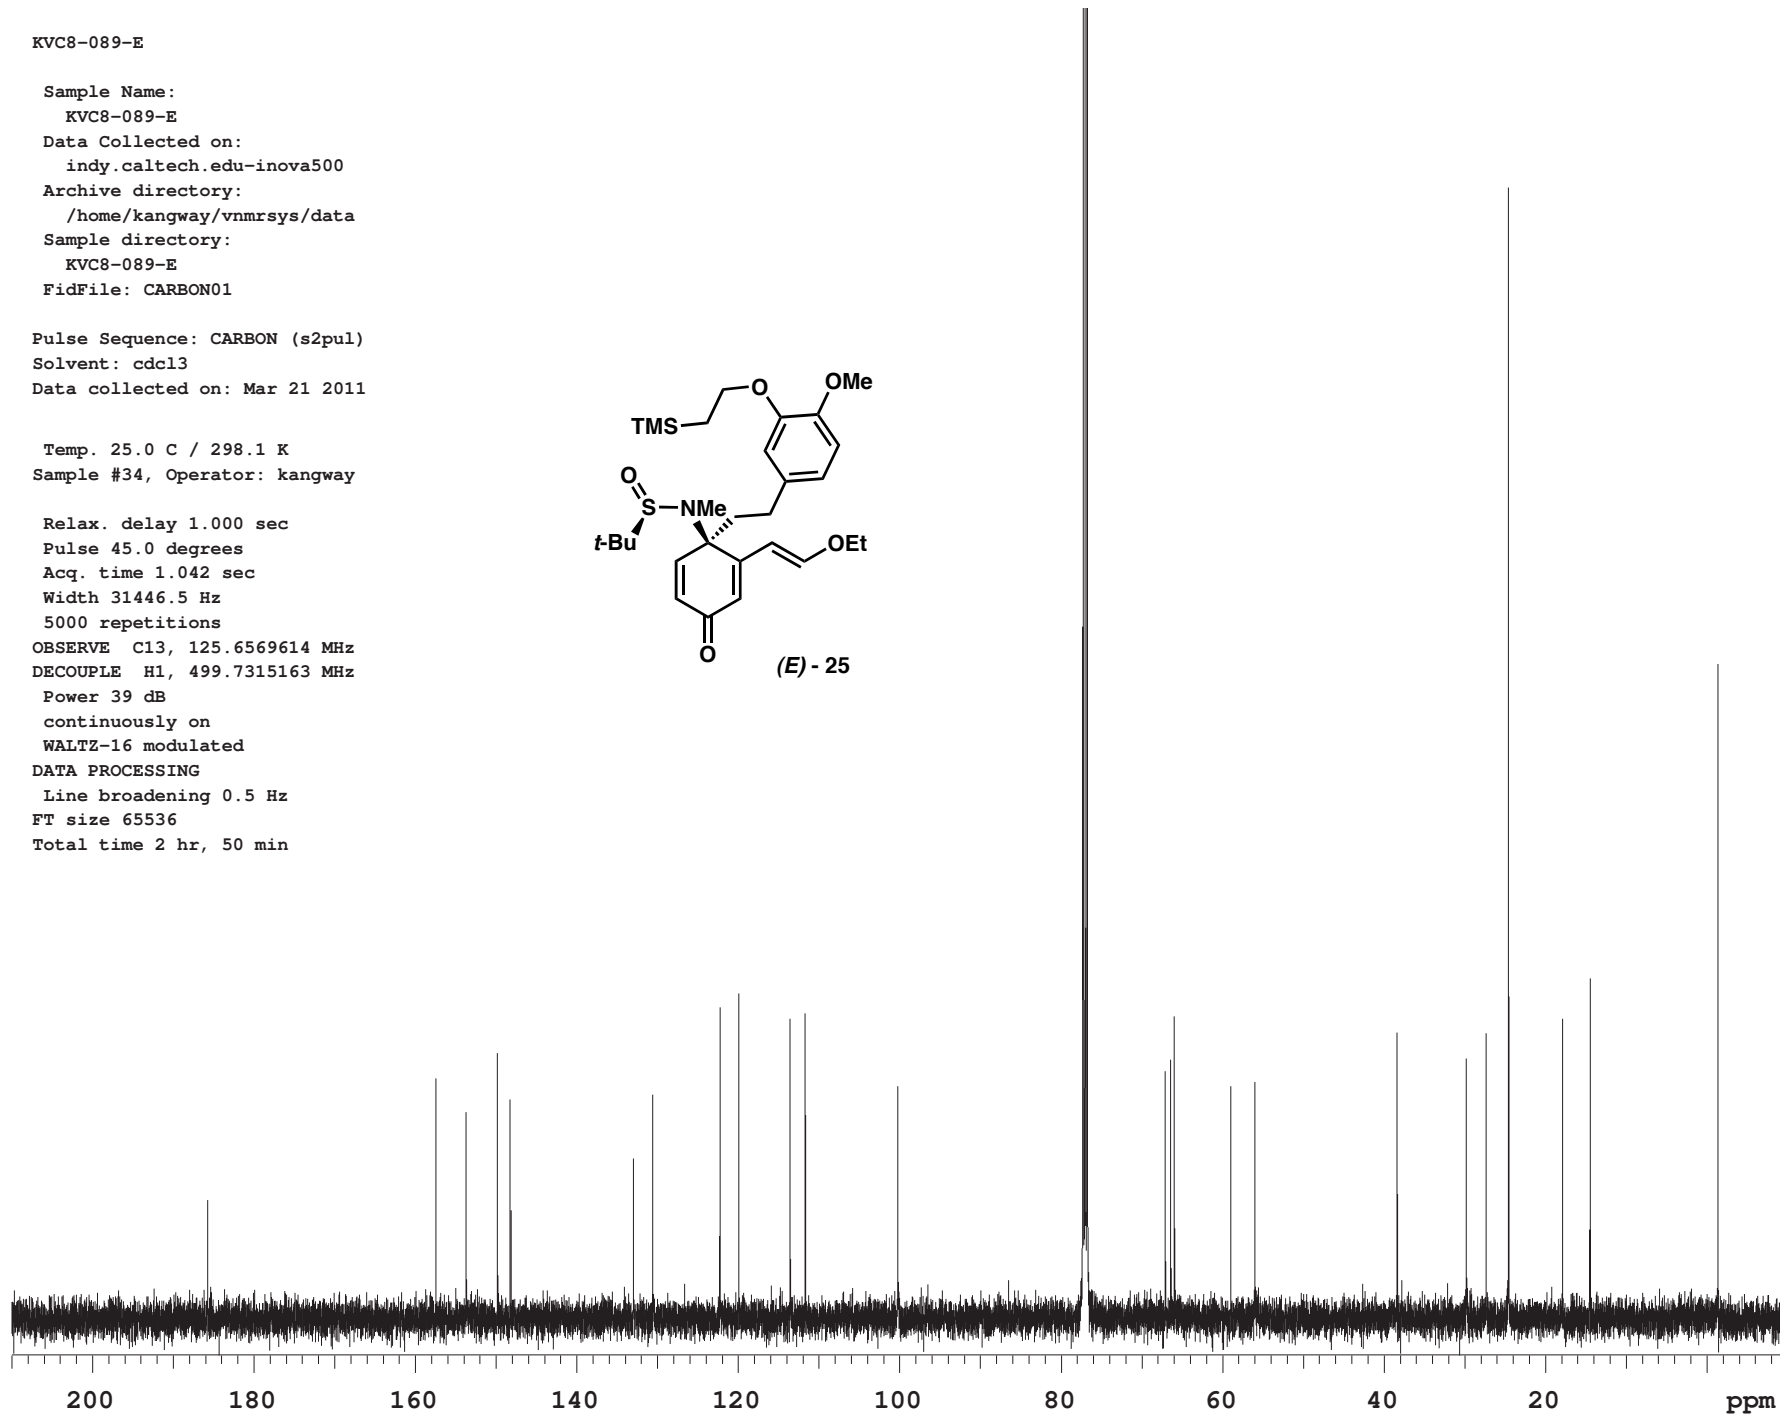

KVC8-041

Sample Name:

KVC8-041

Data Collected on:

indy.caltech.edu-inova500

Archive directory:

/home/kangway/vnmrsys/data

Sample directory:

KVC8-041

FidFile: PROTON02

Pulse Sequence: PROTON (s2pul)

Solvent: cdc13

Data collected on: Mar 4 2011

Temp. 25.0 C / 298.1 K

Sample #44, Operator: kangway

Relax. delay 5.000 sec

Pulse 45.0 degrees

Acq. time 2.500 sec

Width 8000.0 Hz

32 repetitions

OBSERVE H1, 499.7290203 MHz

DATA PROCESSING

Line broadening 0.2 Hz

FT size 65536

Total time 4 min 0 sec

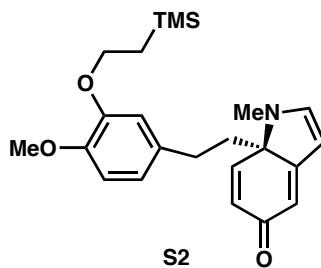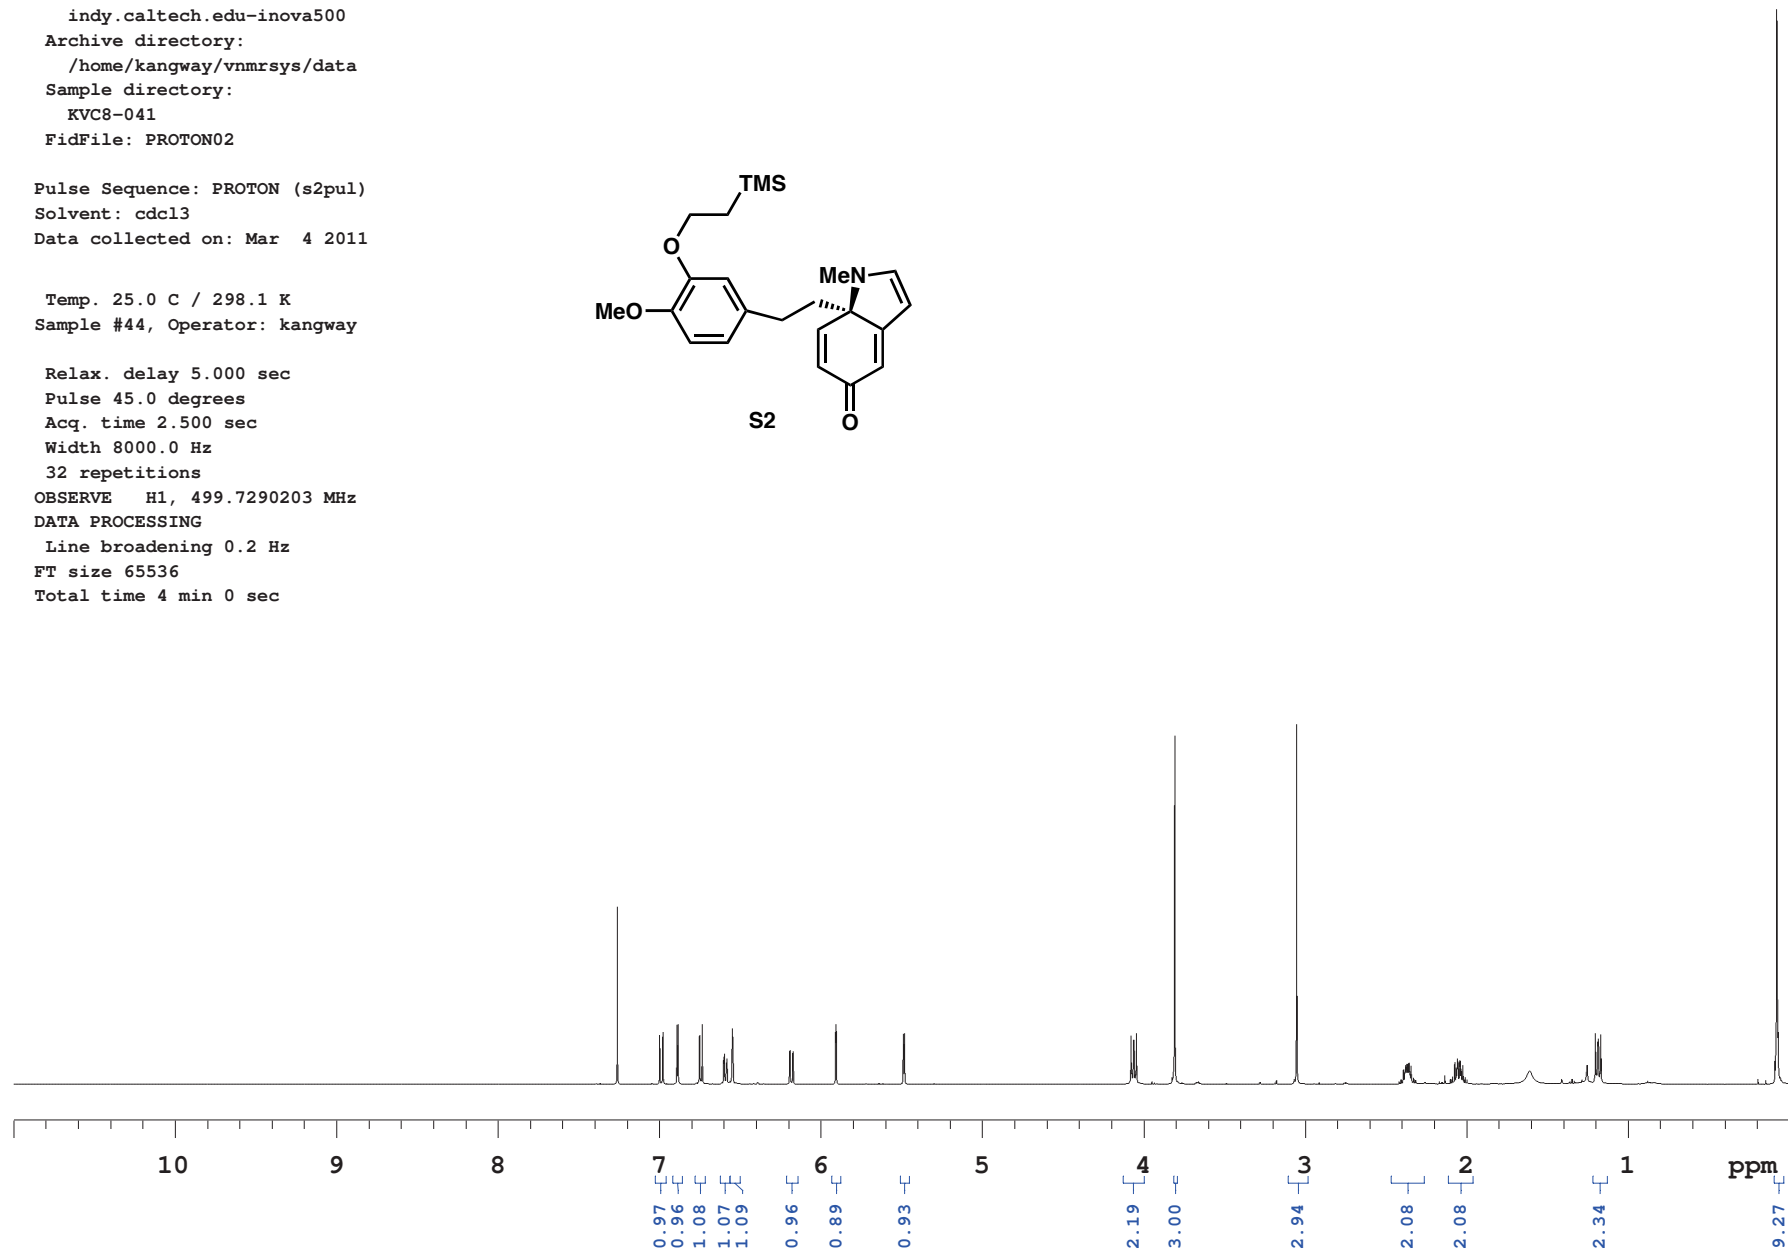



KVC8-041

Sample Name:

KVC8-041

Data Collected on:

indy.caltech.edu-inova500

Archive directory:

/home/kangway/vnmrsys/data

Sample directory:

KVC8-041

FidFile: CARBON01

Pulse Sequence: CARBON (s2pul)

Solvent: cdc13

Data collected on: Mar 4 2011

Temp. 25.0 C / 298.1 K

Sample #43, Operator: kangway

Relax. delay 1.000 sec

Pulse 45.0 degrees

Acq. time 1.042 sec

Width 31446.5 Hz

1500 repetitions

OBSERVE C13, 125.6569623 MHz

DECOUPLE H1, 499.7315163 MHz

Power 39 dB

continuously on

WALTZ-16 modulated

DATA PROCESSING

Line broadening 0.5 Hz

FT size 65536

Total time 51 min

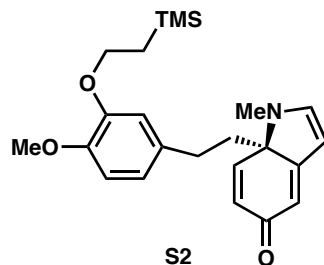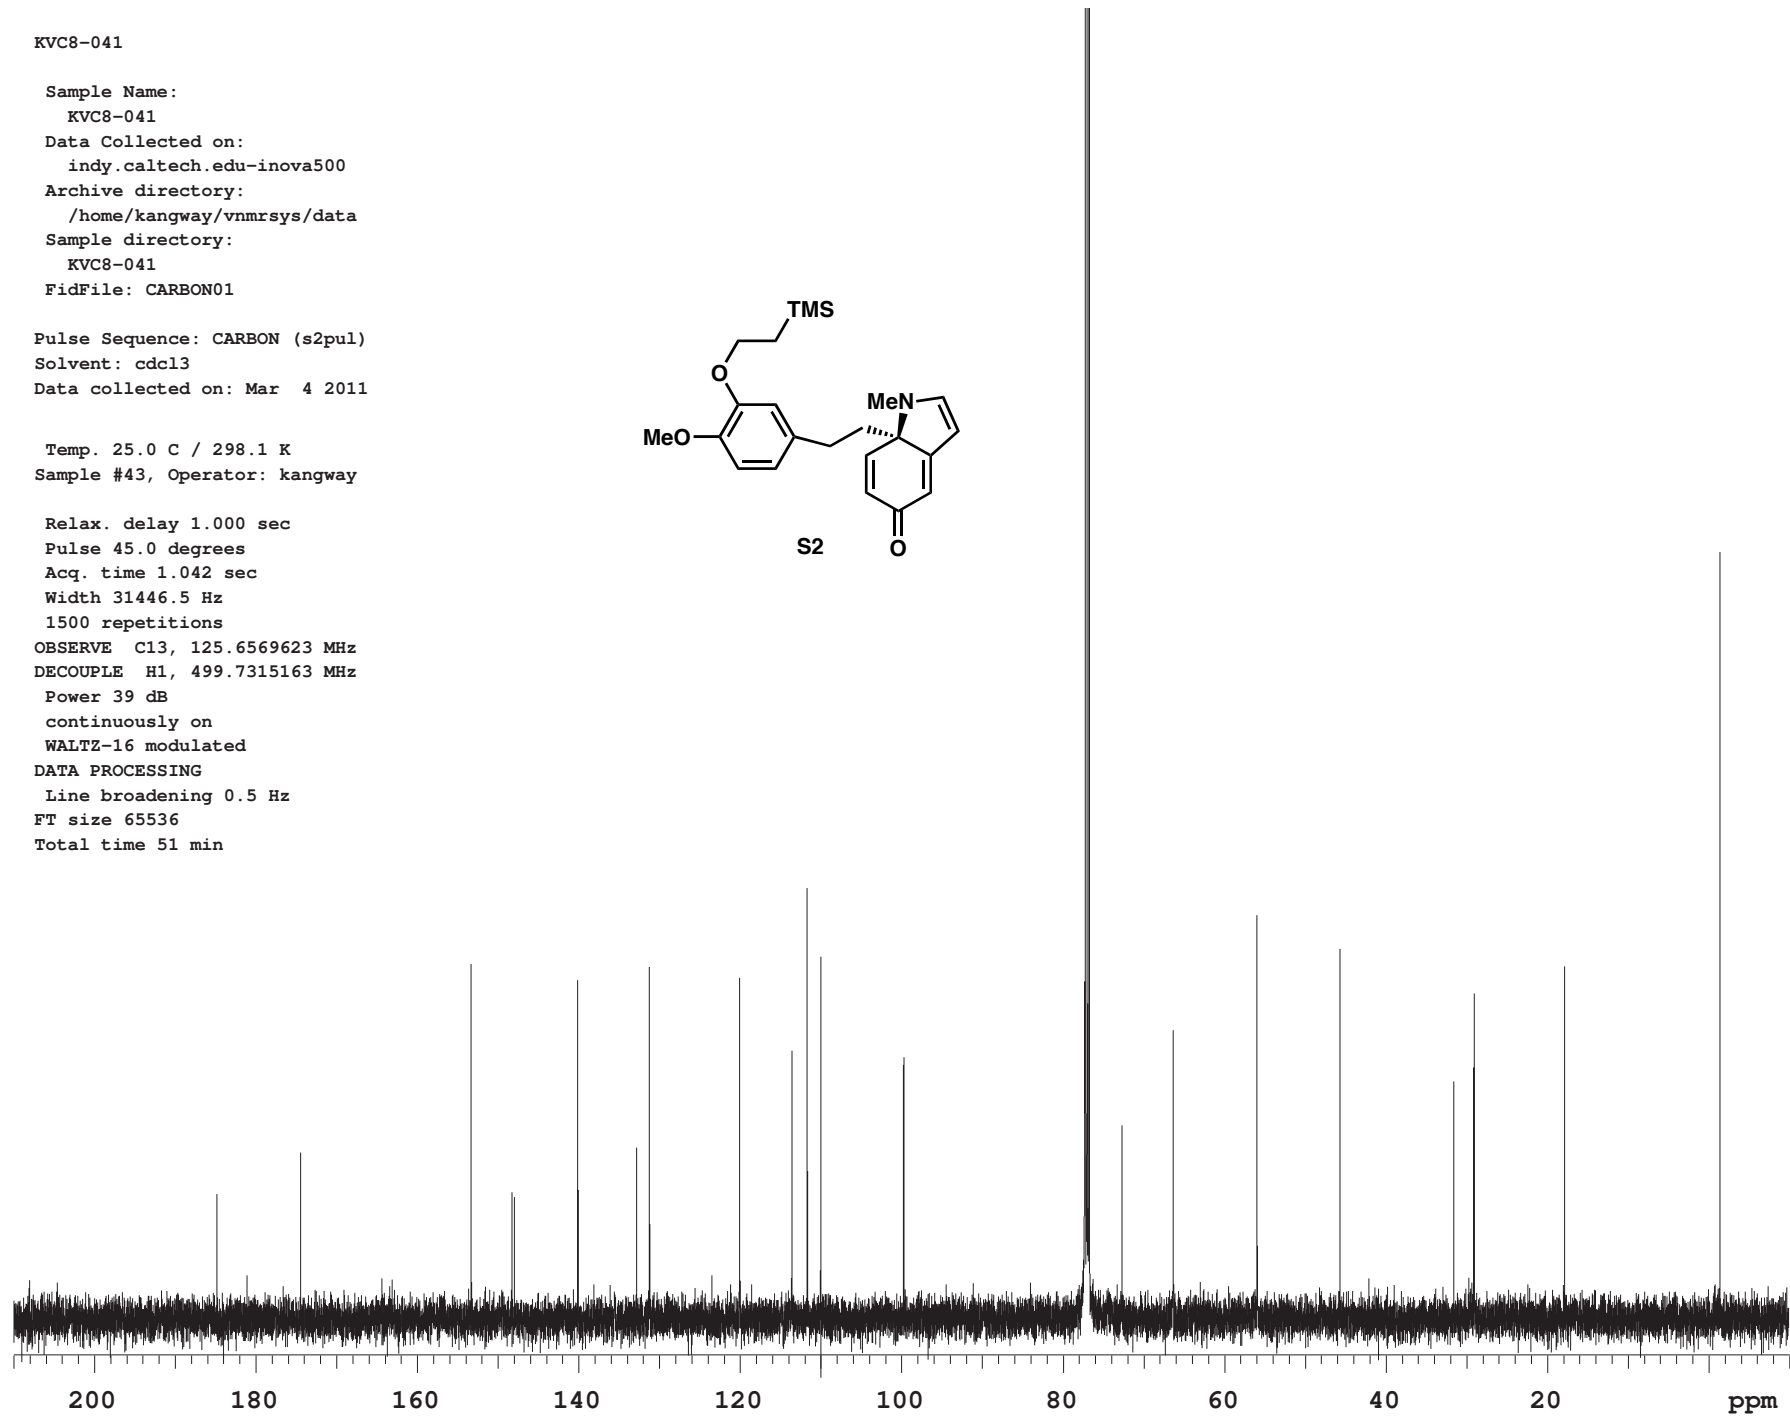

KVC6-101

Sample Name:

KVC6-101

Data Collected on:

indy.caltech.edu-inova500

Archive directory:

/home/kangway/vnmrSYS/data

Sample directory:

KVC6-101

FidFile: PROTON02

Pulse Sequence: PROTON (s2pul)

Solvent: cdc13

Data collected on: Mar 16 2011

Temp. 25.0 C / 298.1 K

Sample #33, Operator: kangway

Relax. delay 5.000 sec

Pulse 45.0 degrees

Acq. time 2.500 sec

Width 8000.0 Hz

32 repetitions

OBSERVE H1, 499.7290203 MHz

DATA PROCESSING

FT size 65536

Total time 4 min 0 sec

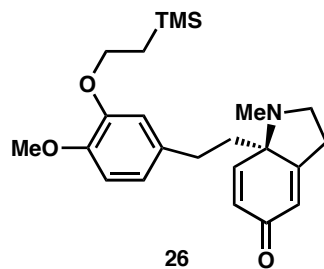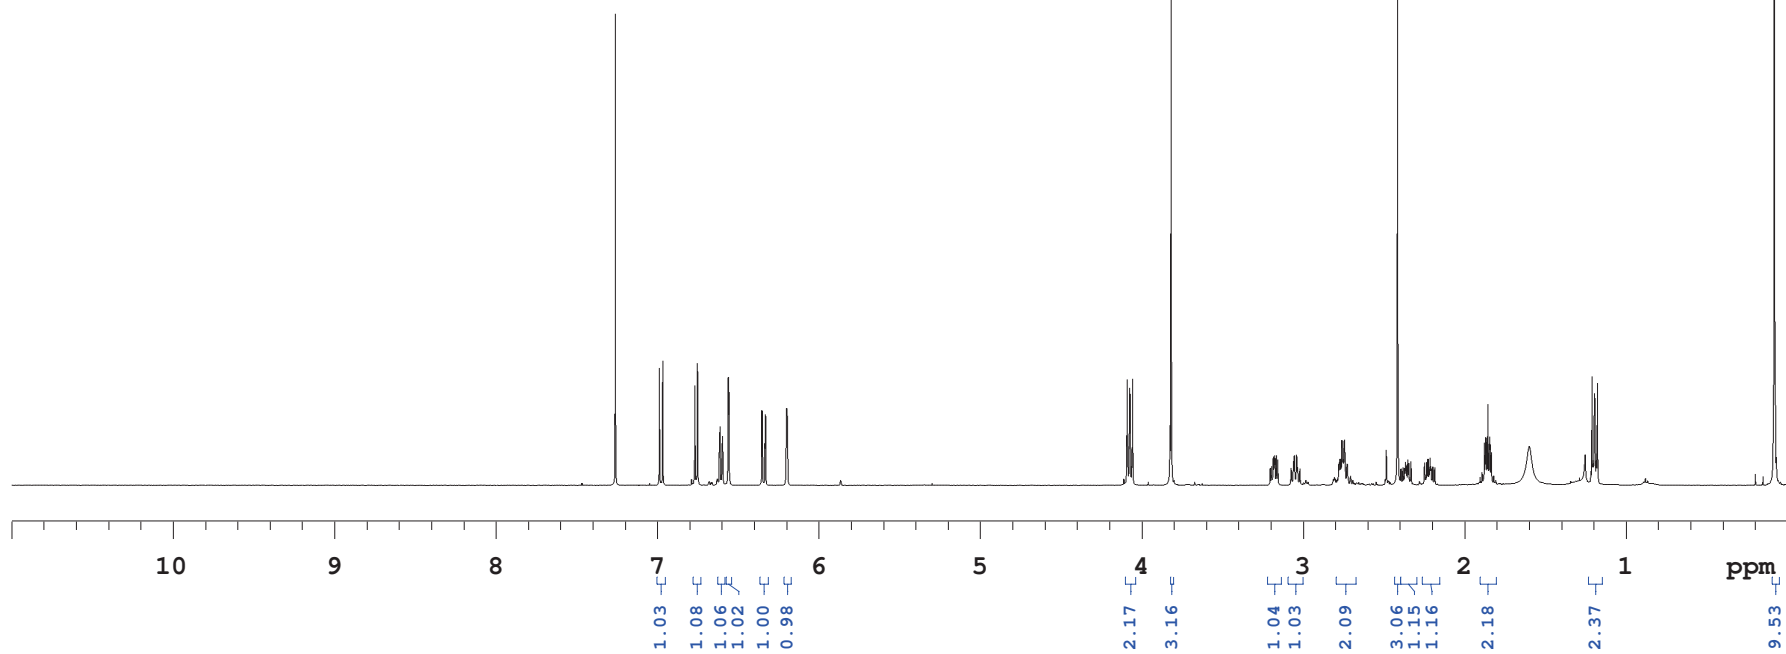

KVC6-101

Sample Name:

KVC6-101

Data Collected on:

indy.caltech.edu-inova500

Archive directory:

/home/kangway/vnmrsys/data

Sample directory:

KVC6-101

FidFile: CARBON01

Pulse Sequence: CARBON (s2pul)

Solvent: cdc13

Data collected on: Mar 16 2011

Temp. 25.0 C / 298.1 K

Sample #33, Operator: kangway

Relax. delay 1.000 sec

Pulse 45.0 degrees

Acq. time 1.042 sec

Width 31446.5 Hz

1500 repetitions

OBSERVE C13, 125.6569623 MHz

DECOUPLE H1, 499.7315163 MHz

Power 39 dB

continuously on

WALTZ-16 modulated

DATA PROCESSING

Line broadening 0.5 Hz

FT size 65536

Total time 51 min

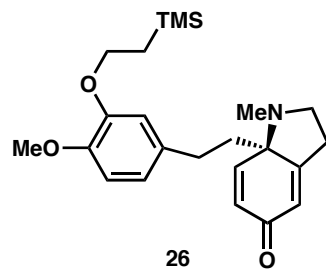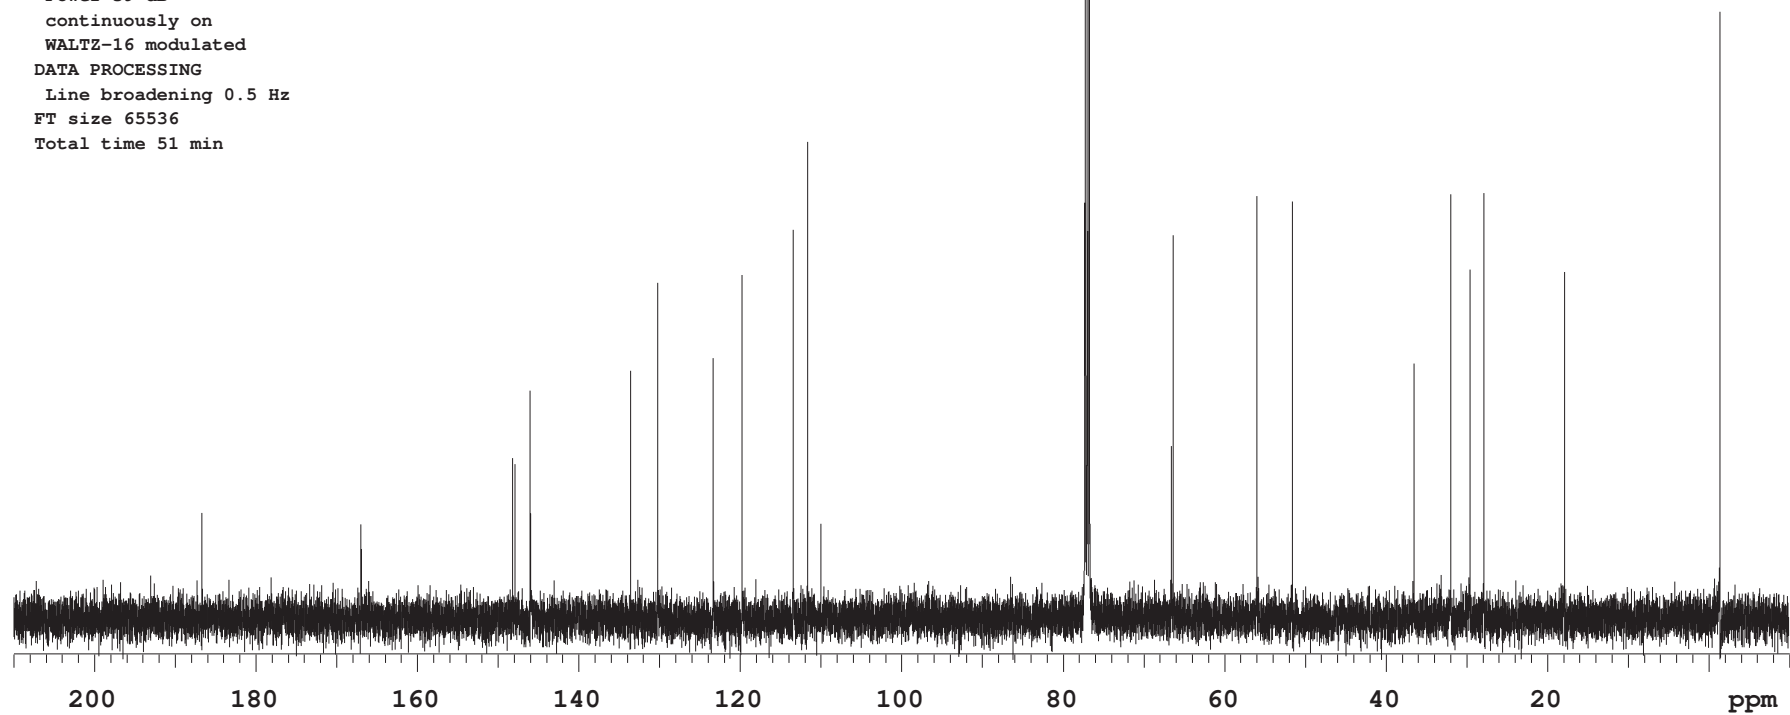

KVC6-153

Sample Name:

KVC6-153

Data Collected on:

indy.caltech.edu-inova500

Archive directory:

/home/kangway/vnmrsys/data

Sample directory:

KVC6-153

FidFile: PROTON01

Pulse Sequence: PROTON (s2pul)

Solvent: cdc13

Data collected on: Feb 14 2011

Temp. 25.0 C / 298.1 K

Sample #41, Operator: kangway

Relax. delay 5.000 sec

Pulse 45.0 degrees

Acq. time 2.500 sec

Width 8000.0 Hz

32 repetitions

OBSERVE H1, 499.7290176 MHz

DATA PROCESSING

Line broadening 0.2 Hz

FT size 65536

Total time 4 min 0 sec

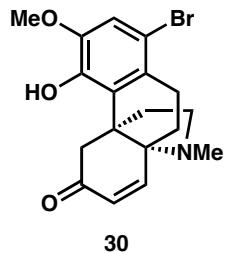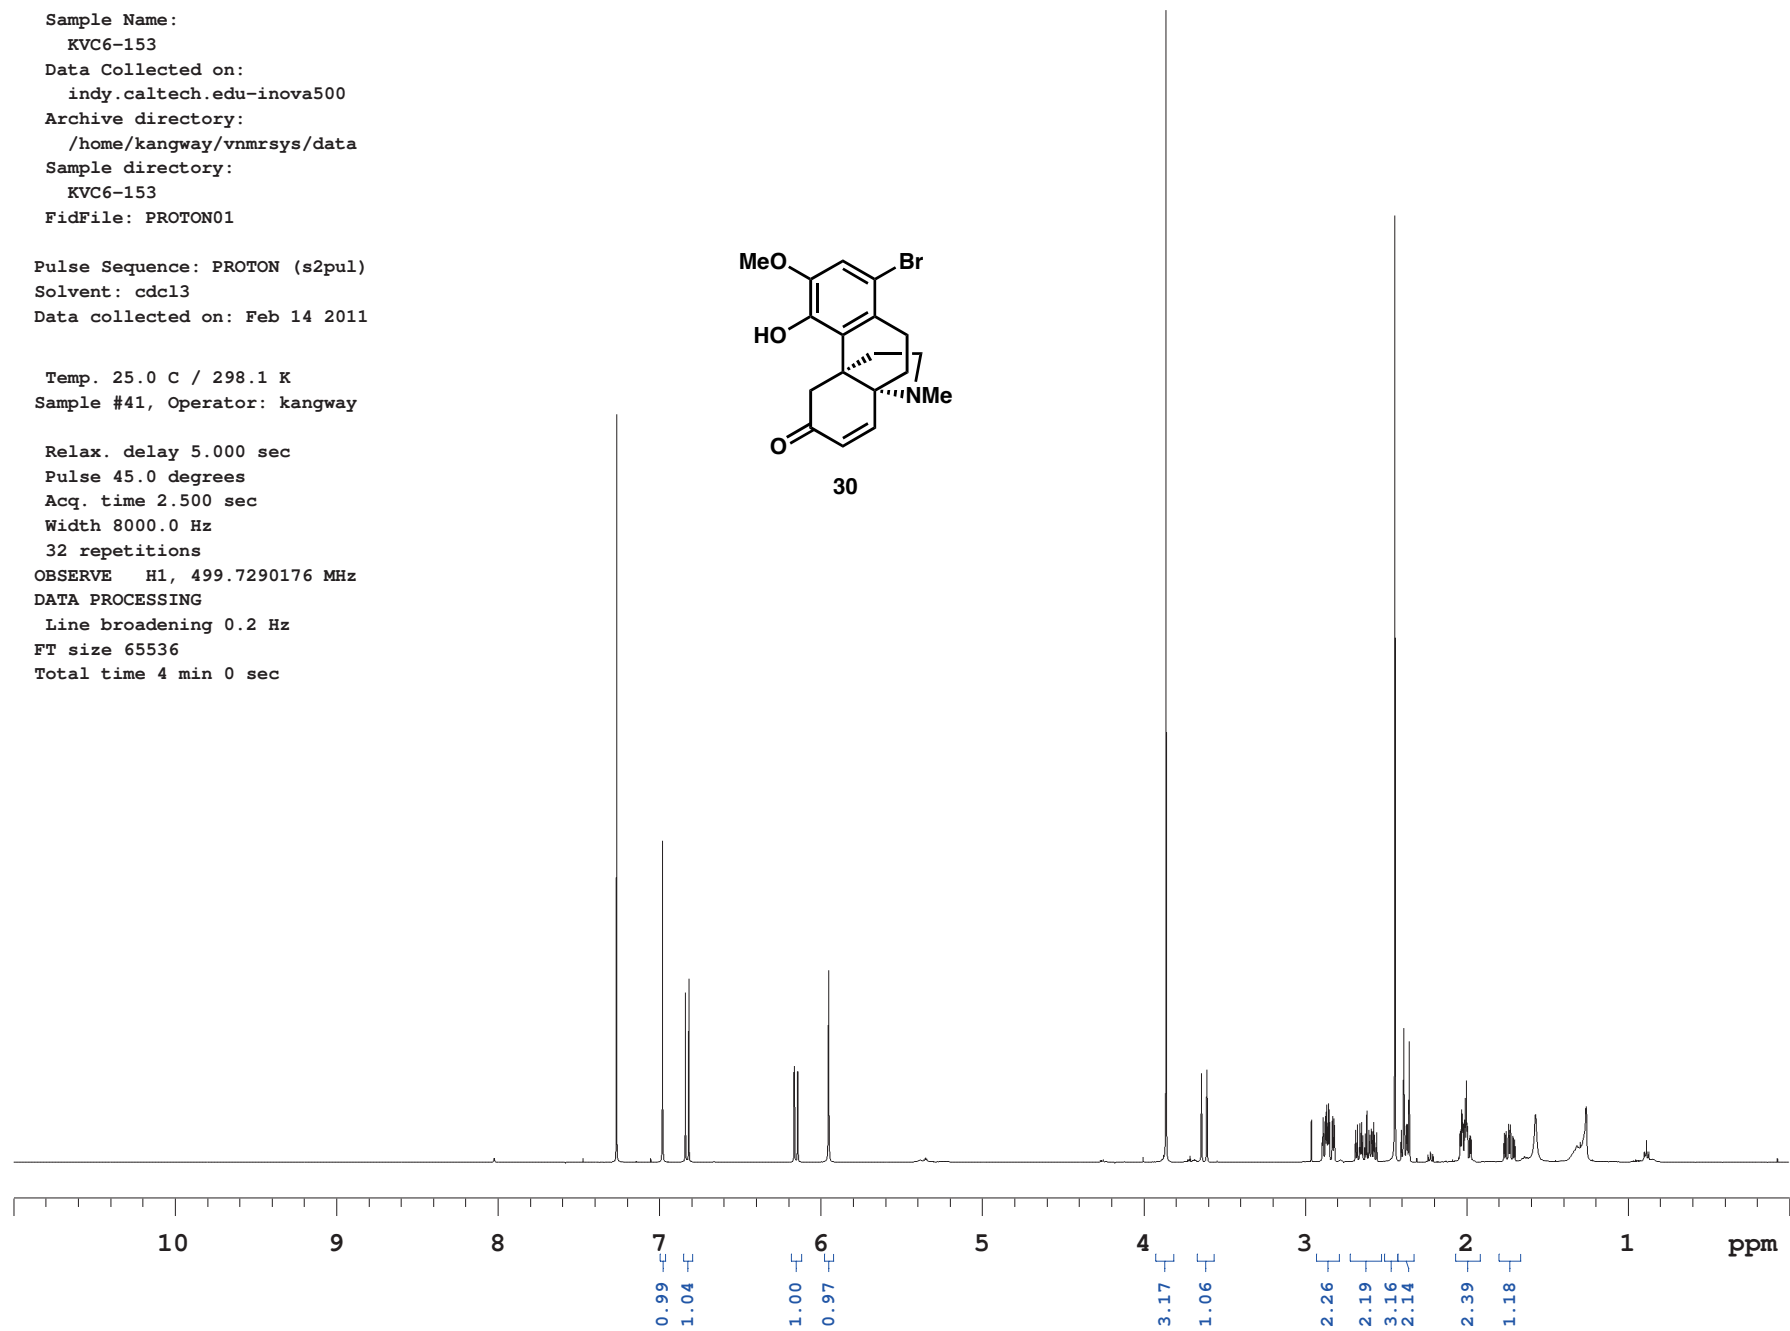

KVC6-153

Sample Name:

KVC6-153

Data Collected on:

indy.caltech.edu-inova500

Archive directory:

/home/kangway/vnmrsys/data

Sample directory:

KVC6-153

FidFile: CARBON01

Pulse Sequence: CARBON (s2pul)

Solvent: cdcl3

Data collected on: Feb 14 2011

Temp. 25.0 C / 298.1 K

Sample #41, Operator: kangway

Relax. delay 1.000 sec

Pulse 45.0 degrees

Acq. time 1.042 sec

Width 31446.5 Hz

1500 repetitions

OBSERVE C13, 125.6569623 MHz

DECOUPLE H1, 499.7315163 MHz

Power 39 dB

continuously on

WALTZ-16 modulated

DATA PROCESSING

Line broadening 0.5 Hz

FT size 65536

Total time 51 min

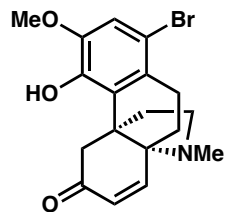

30

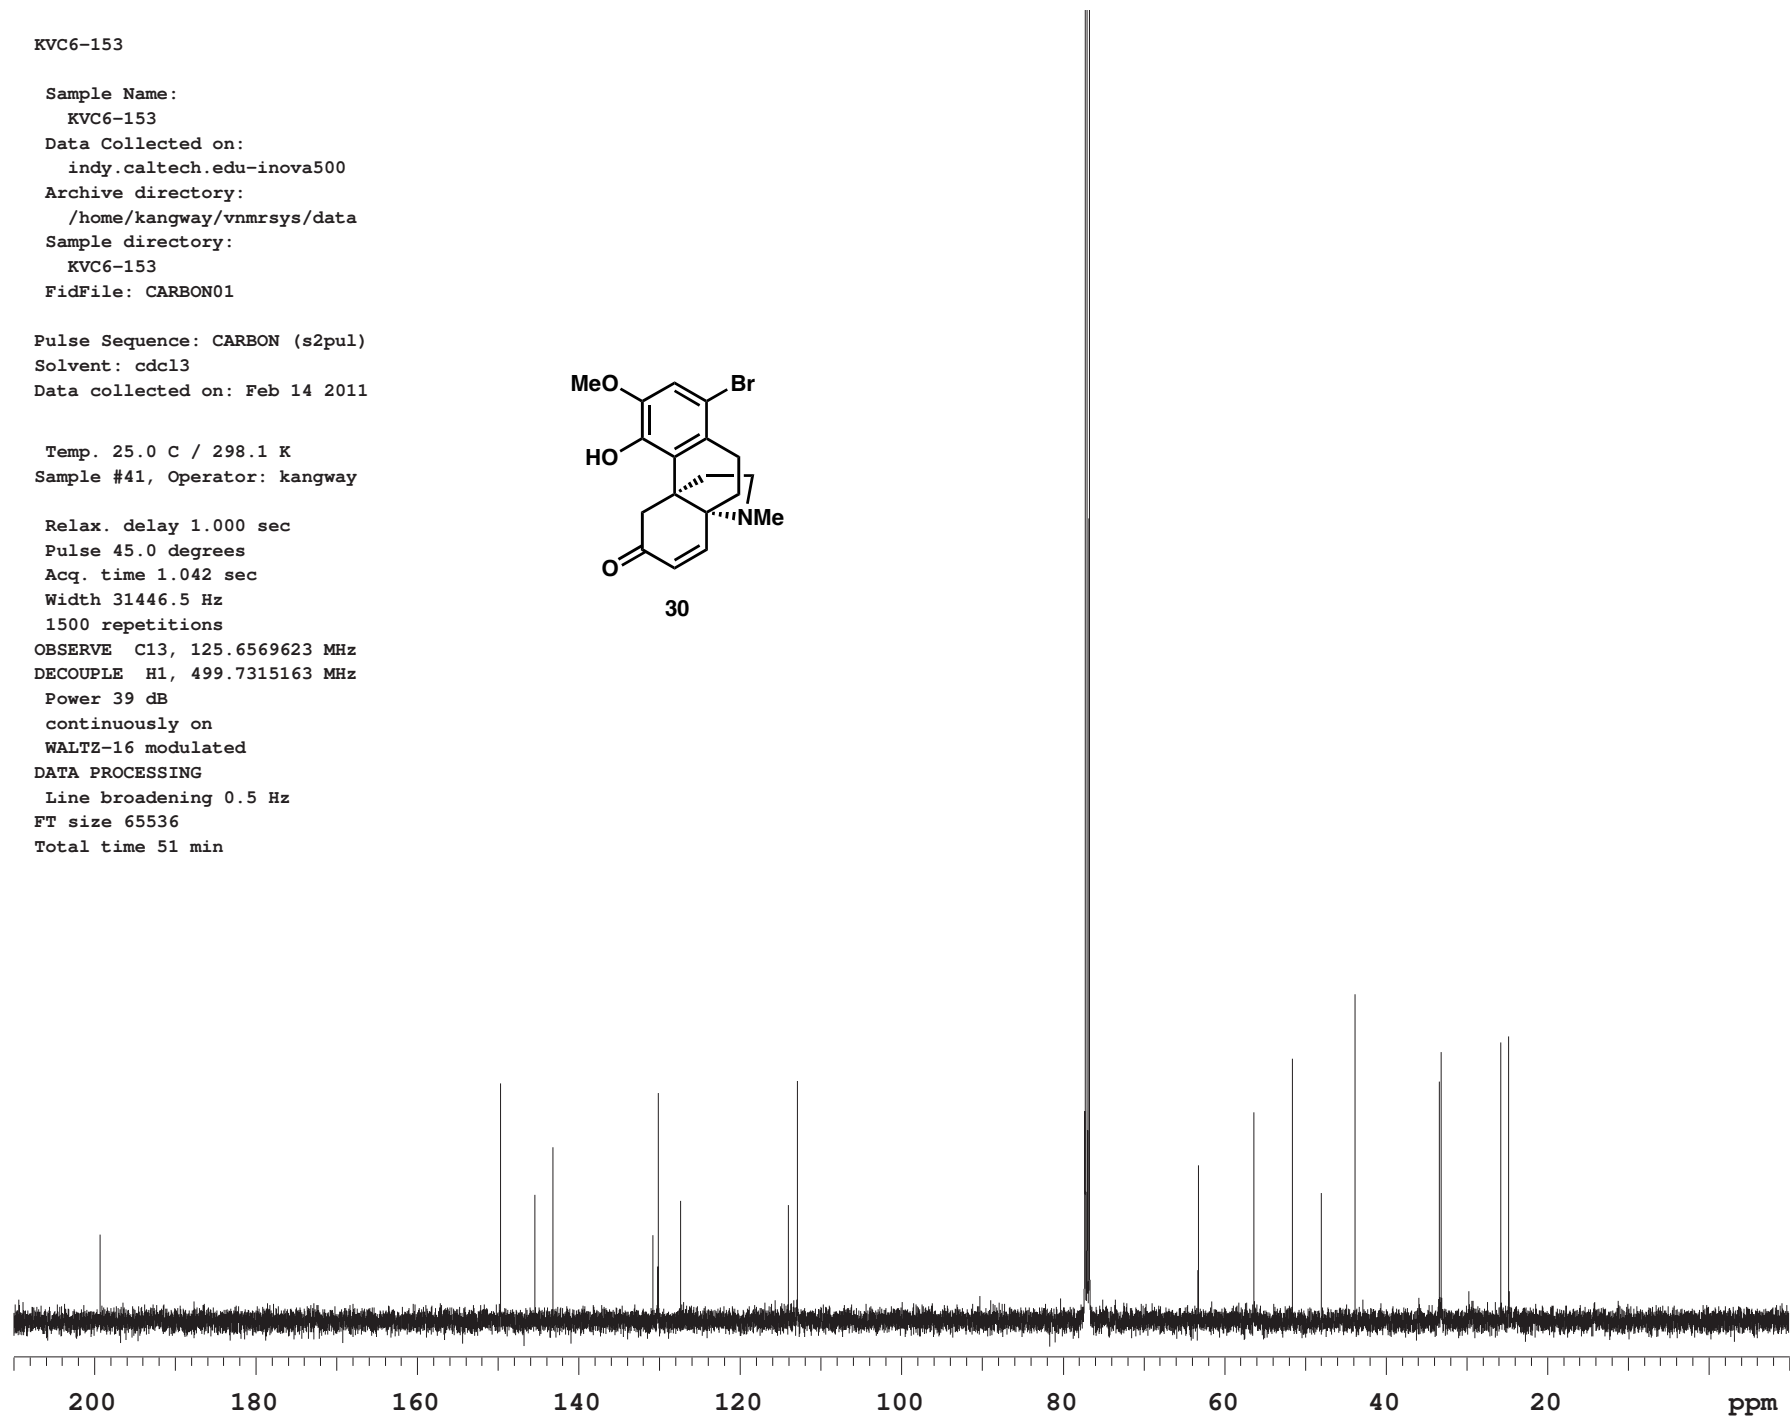

KVC8-259

Sample Name:

KVC8-259

Data Collected on:

indy.caltech.edu-inova500

Archive directory:

/home/kangway/vnmrsys/data

Sample directory:

KVC8-259

FidFile: PROTON02

Pulse Sequence: PROTON (s2pul)

Solvent: cdc13

Data collected on: Apr 23 2011

Temp. 25.0 C / 298.1 K

Sample #49, Operator: kangway

Relax. delay 5.000 sec

Pulse 45.0 degrees

Acq. time 2.500 sec

Width 8000.0 Hz

32 repetitions

OBSERVE H1, 499.7290205 MHz

DATA PROCESSING

FT size 65536

Total time 4 min 0 sec

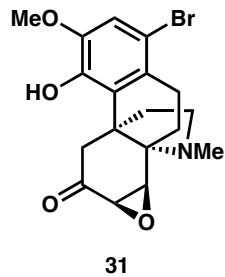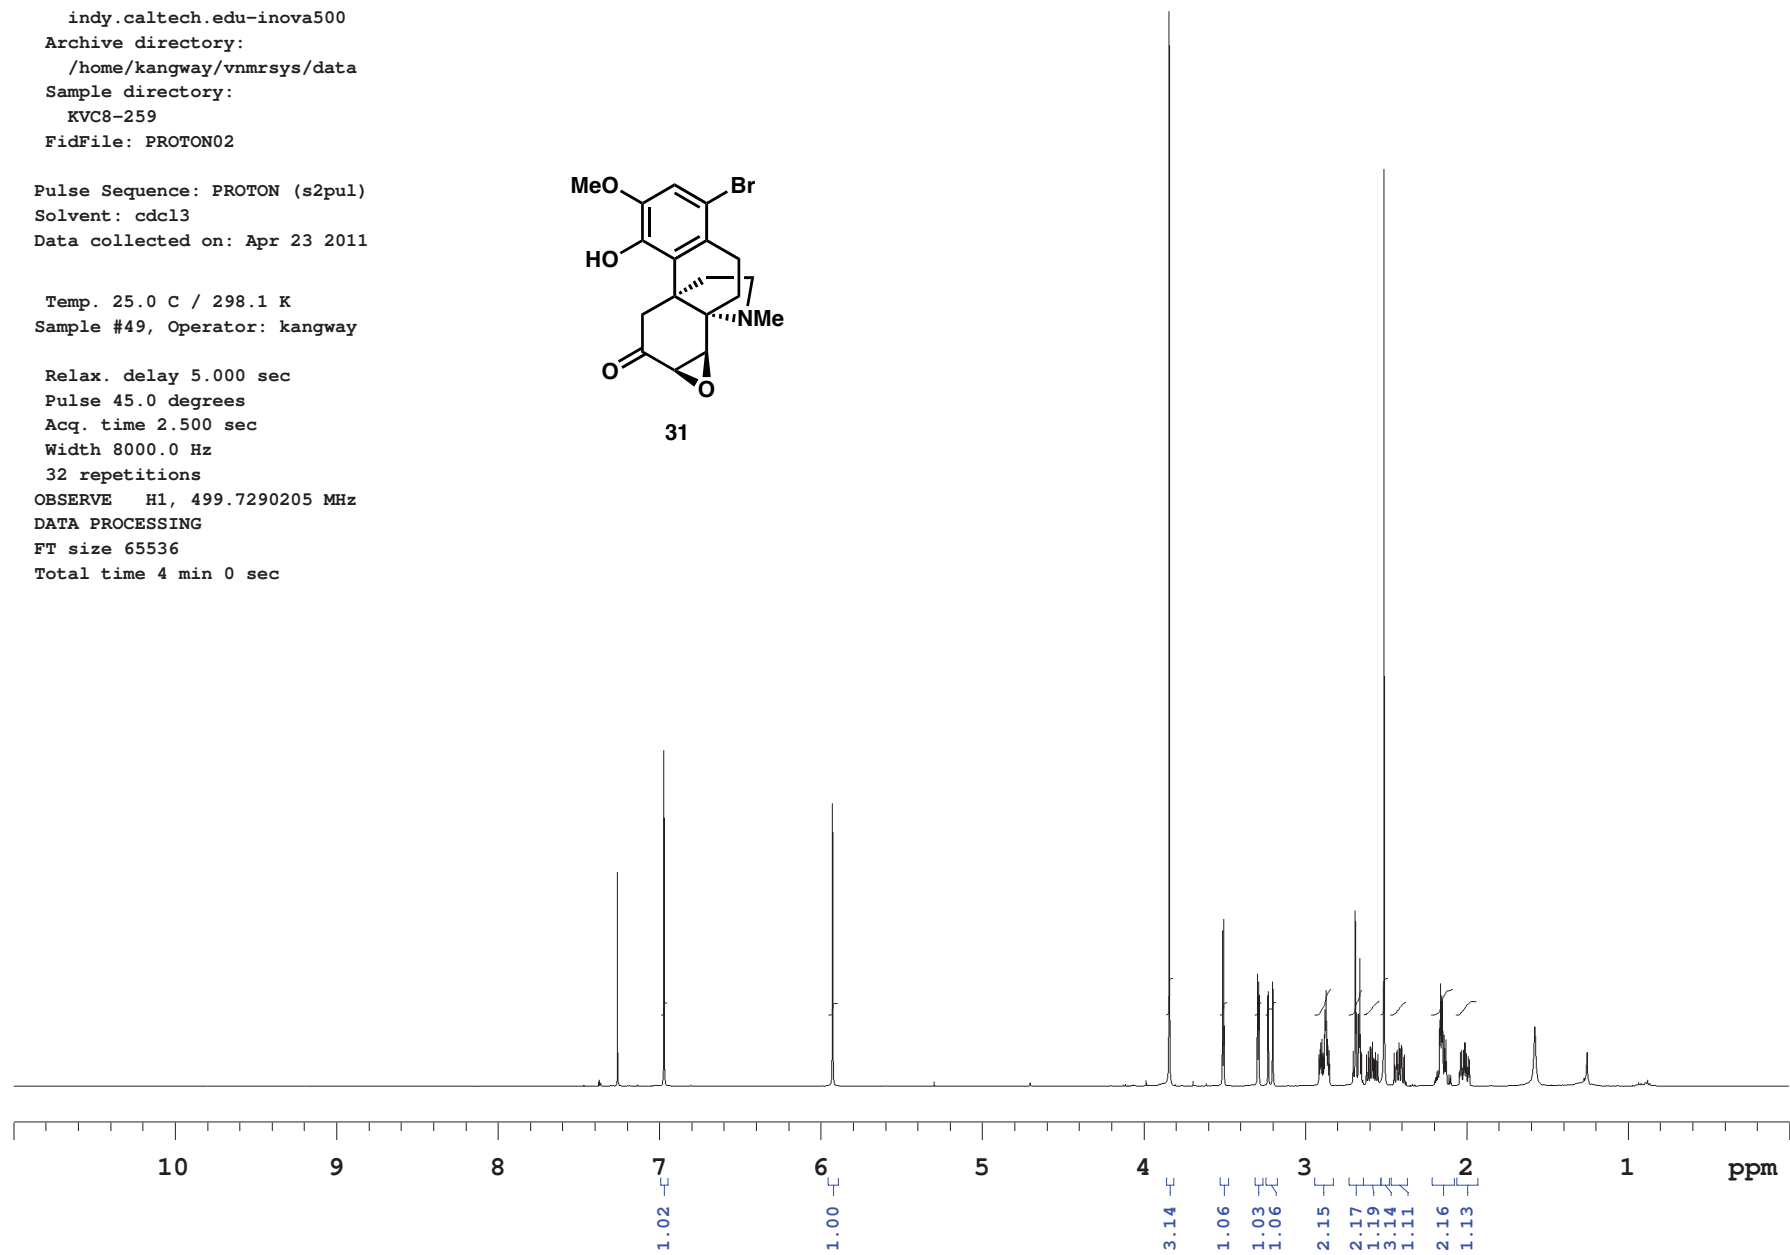

KVC8-259

Sample Name:

KVC8-259

Data Collected on:

indy.caltech.edu-inova500

Archive directory:

/home/kangway/vnmrsys/data

Sample directory:

KVC8-259

FidFile: CARBON01

Pulse Sequence: CARBON (s2pul)

Solvent: cdcl3

Data collected on: Apr 23 2011

Temp. 25.0 C / 298.1 K

Sample #49, Operator: kangway

Relax. delay 1.000 sec

Pulse 45.0 degrees

Acq. time 1.042 sec

Width 31446.5 Hz

1500 repetitions

OBSERVE C13, 125.6569623 MHz

DECOUPLE H1, 499.7315163 MHz

Power 39 dB

continuously on

WALTZ-16 modulated

DATA PROCESSING

Line broadening 0.5 Hz

FT size 65536

Total time 51 min

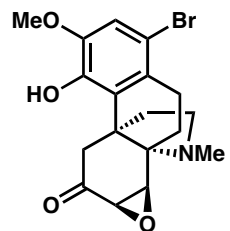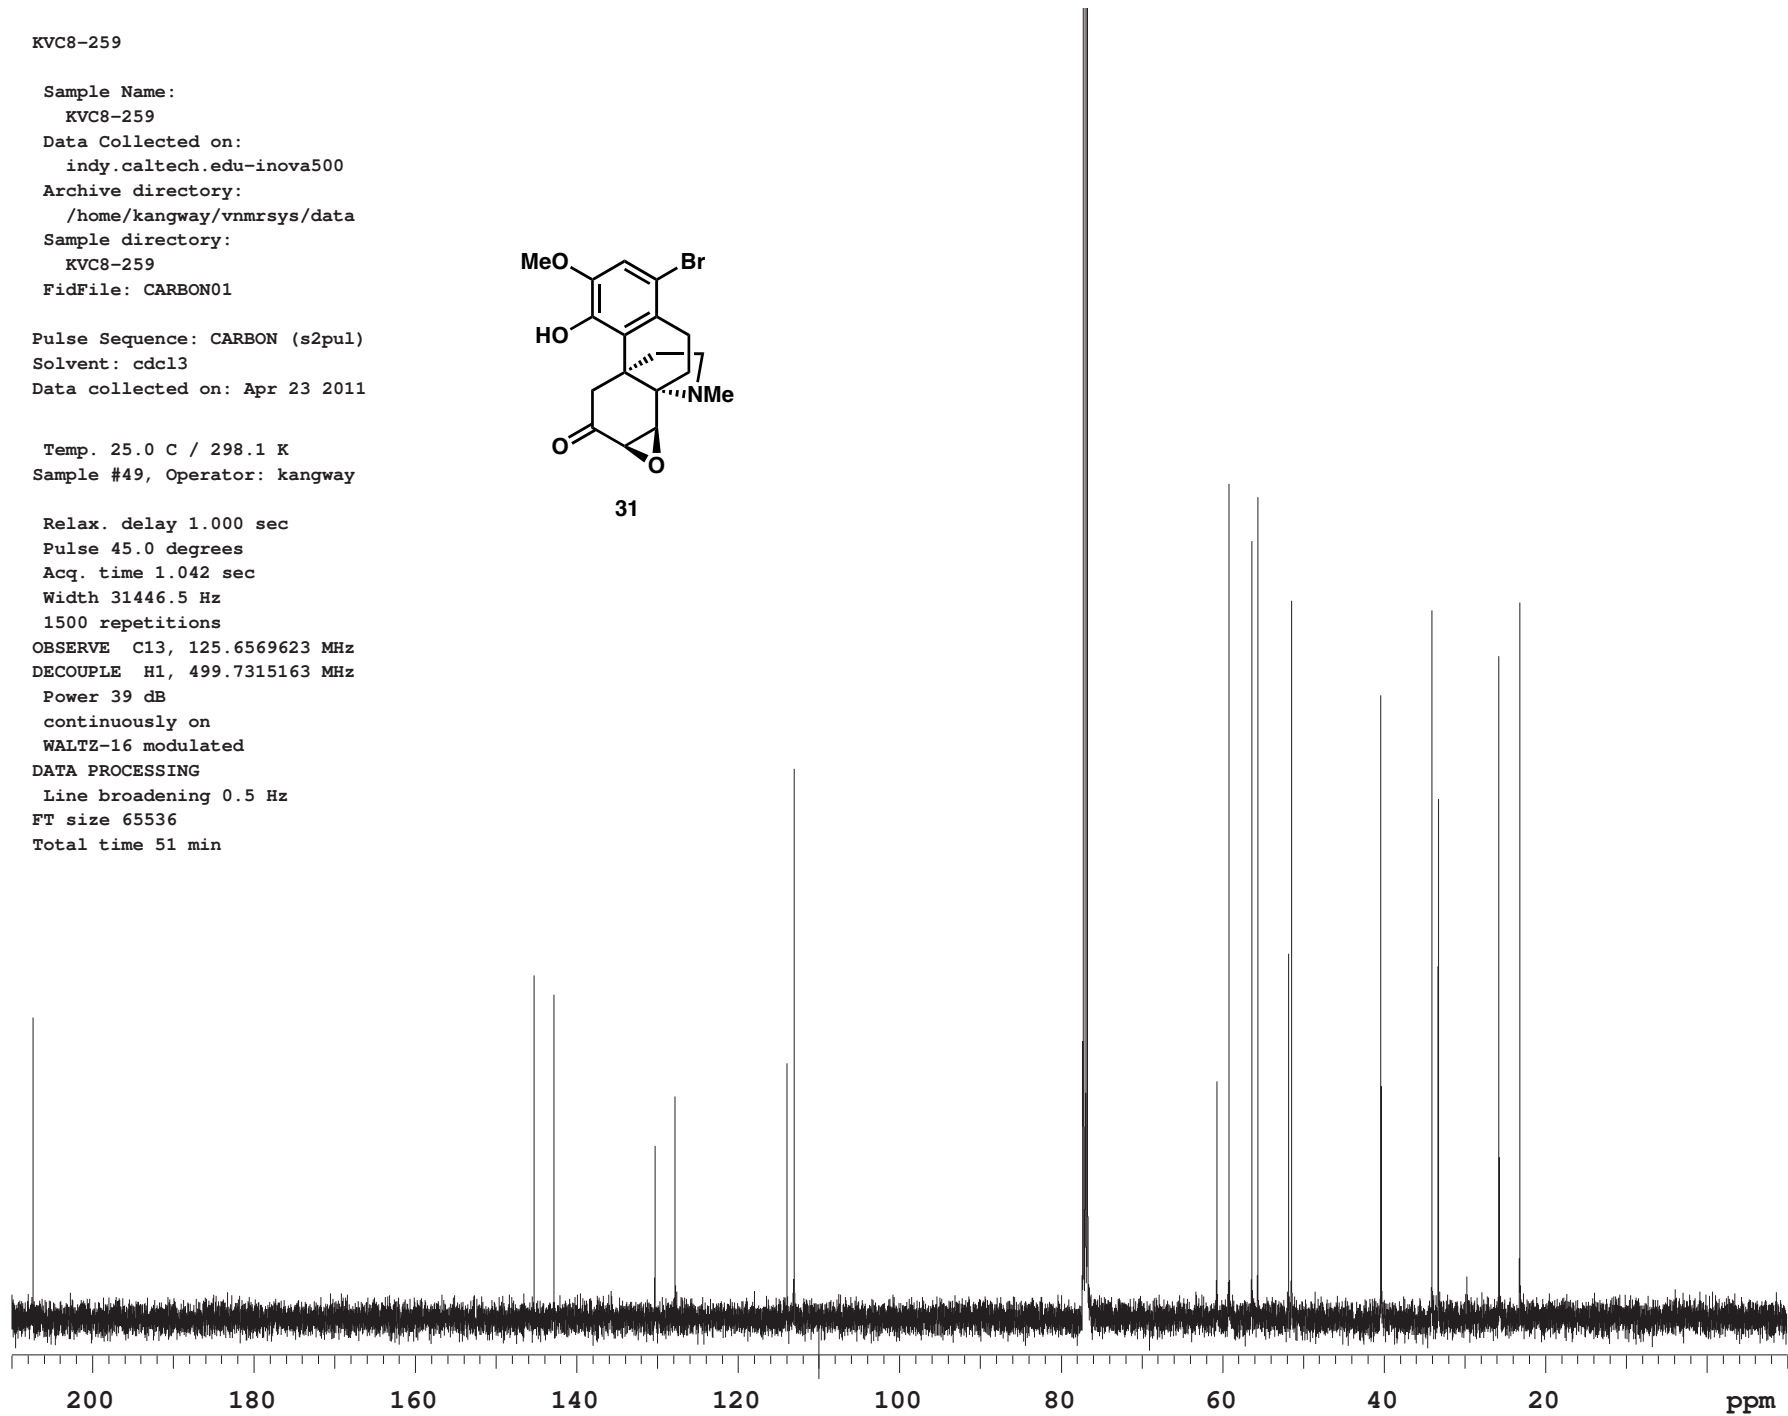

KVC9-277

Sample Name:  
KVC9-277  
Data Collected on:  
indy.caltech.edu-inova500  
Archive directory:  
/home/kangway/vnmrsys/data  
Sample directory:  
KVC9-277  
FidFile: PROTON04

Pulse Sequence: PROTON (s2pul)  
Solvent: cdcl3  
Data collected on: Jun 20 2011

Temp. 25.0 C / 298.1 K  
Sample #48, Operator: kangway

Relax. delay 5.000 sec  
Pulse 45.0 degrees  
Acq. time 2.500 sec  
Width 8000.0 Hz  
32 repetitions  
OBSERVE H1, 499.7290203 MHz  
DATA PROCESSING  
Line broadening 0.2 Hz  
FT size 65536  
Total time 4 min 0 sec

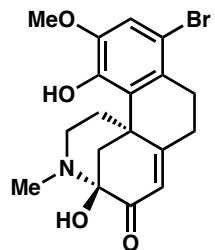

33

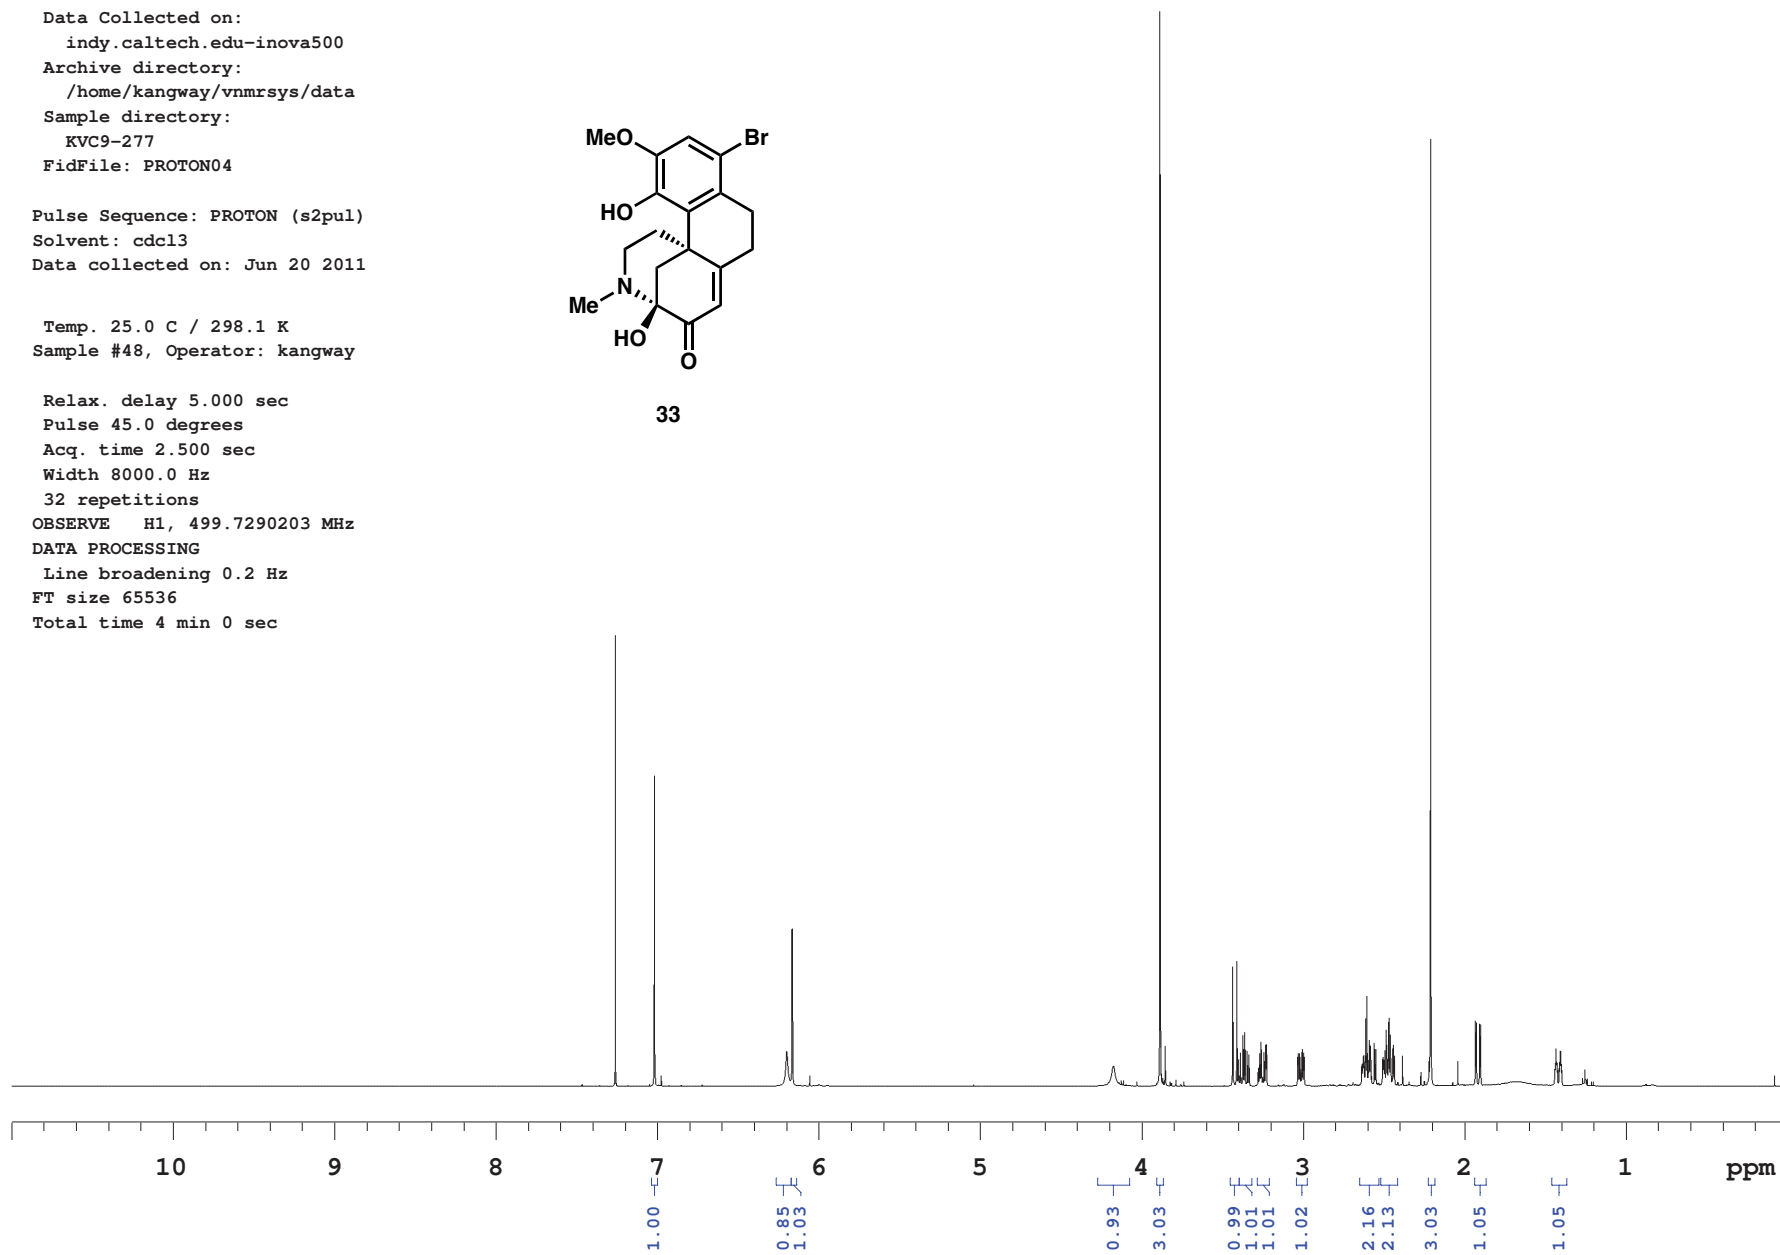



KVC9-277

Sample Name:

KVC9-277

Data Collected on:

indy.caltech.edu-inova500

Archive directory:

/home/kangway/vnmrsys/data

Sample directory:

KVC9-277

FidFile: CARBON02

Pulse Sequence: CARBON (s2pul)

Solvent: cdcl3

Data collected on: Jun 18 2011

Temp. 25.0 C / 298.1 K

Sample #43, Operator: kangway

Relax. delay 1.000 sec

Pulse 45.0 degrees

Acq. time 1.042 sec

Width 31446.5 Hz

1000 repetitions

OBSERVE C13, 125.6569652 MHz

DECOUPLE H1, 499.7315163 MHz

Power 39 dB

continuously on

WALTZ-16 modulated

DATA PROCESSING

Line broadening 0.5 Hz

FT size 65536

Total time 34 min

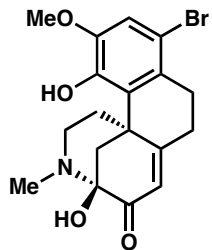

33

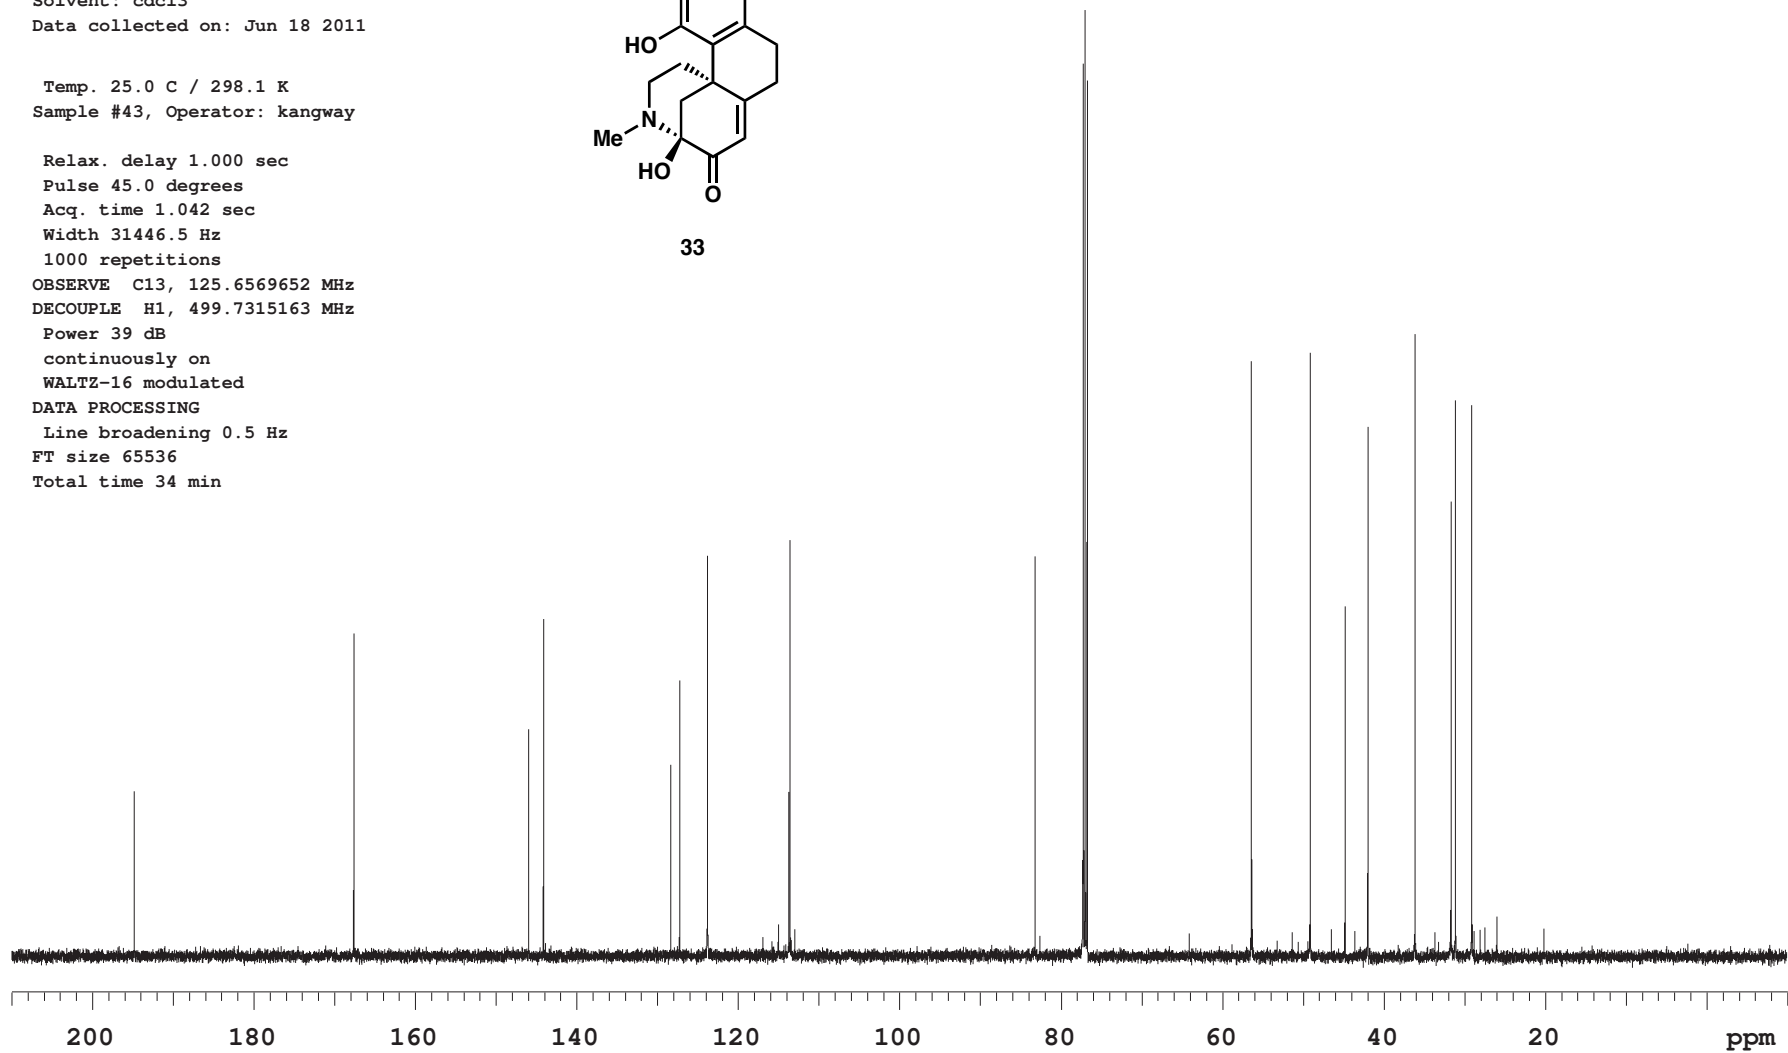

KVC9-297

Sample Name:

KVC9-297

Data Collected on:

indy.caltech.edu-inova500

Archive directory:

/home/kangway/vnmrsys/data

Sample directory:

KVC9-297

FidFile: PROTON01

Pulse Sequence: PROTON (s2pul)

Solvent: cdc13

Data collected on: Jun 21 2011

Temp. 25.0 C / 298.1 K

Sample #47, Operator: kangway

Relax. delay 5.000 sec

Pulse 45.0 degrees

Acq. time 2.500 sec

Width 8000.0 Hz

32 repetitions

OBSERVE H1, 499.7290203 MHz

DATA PROCESSING

FT size 65536

Total time 4 min 0 sec

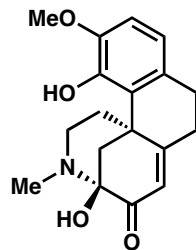

S3

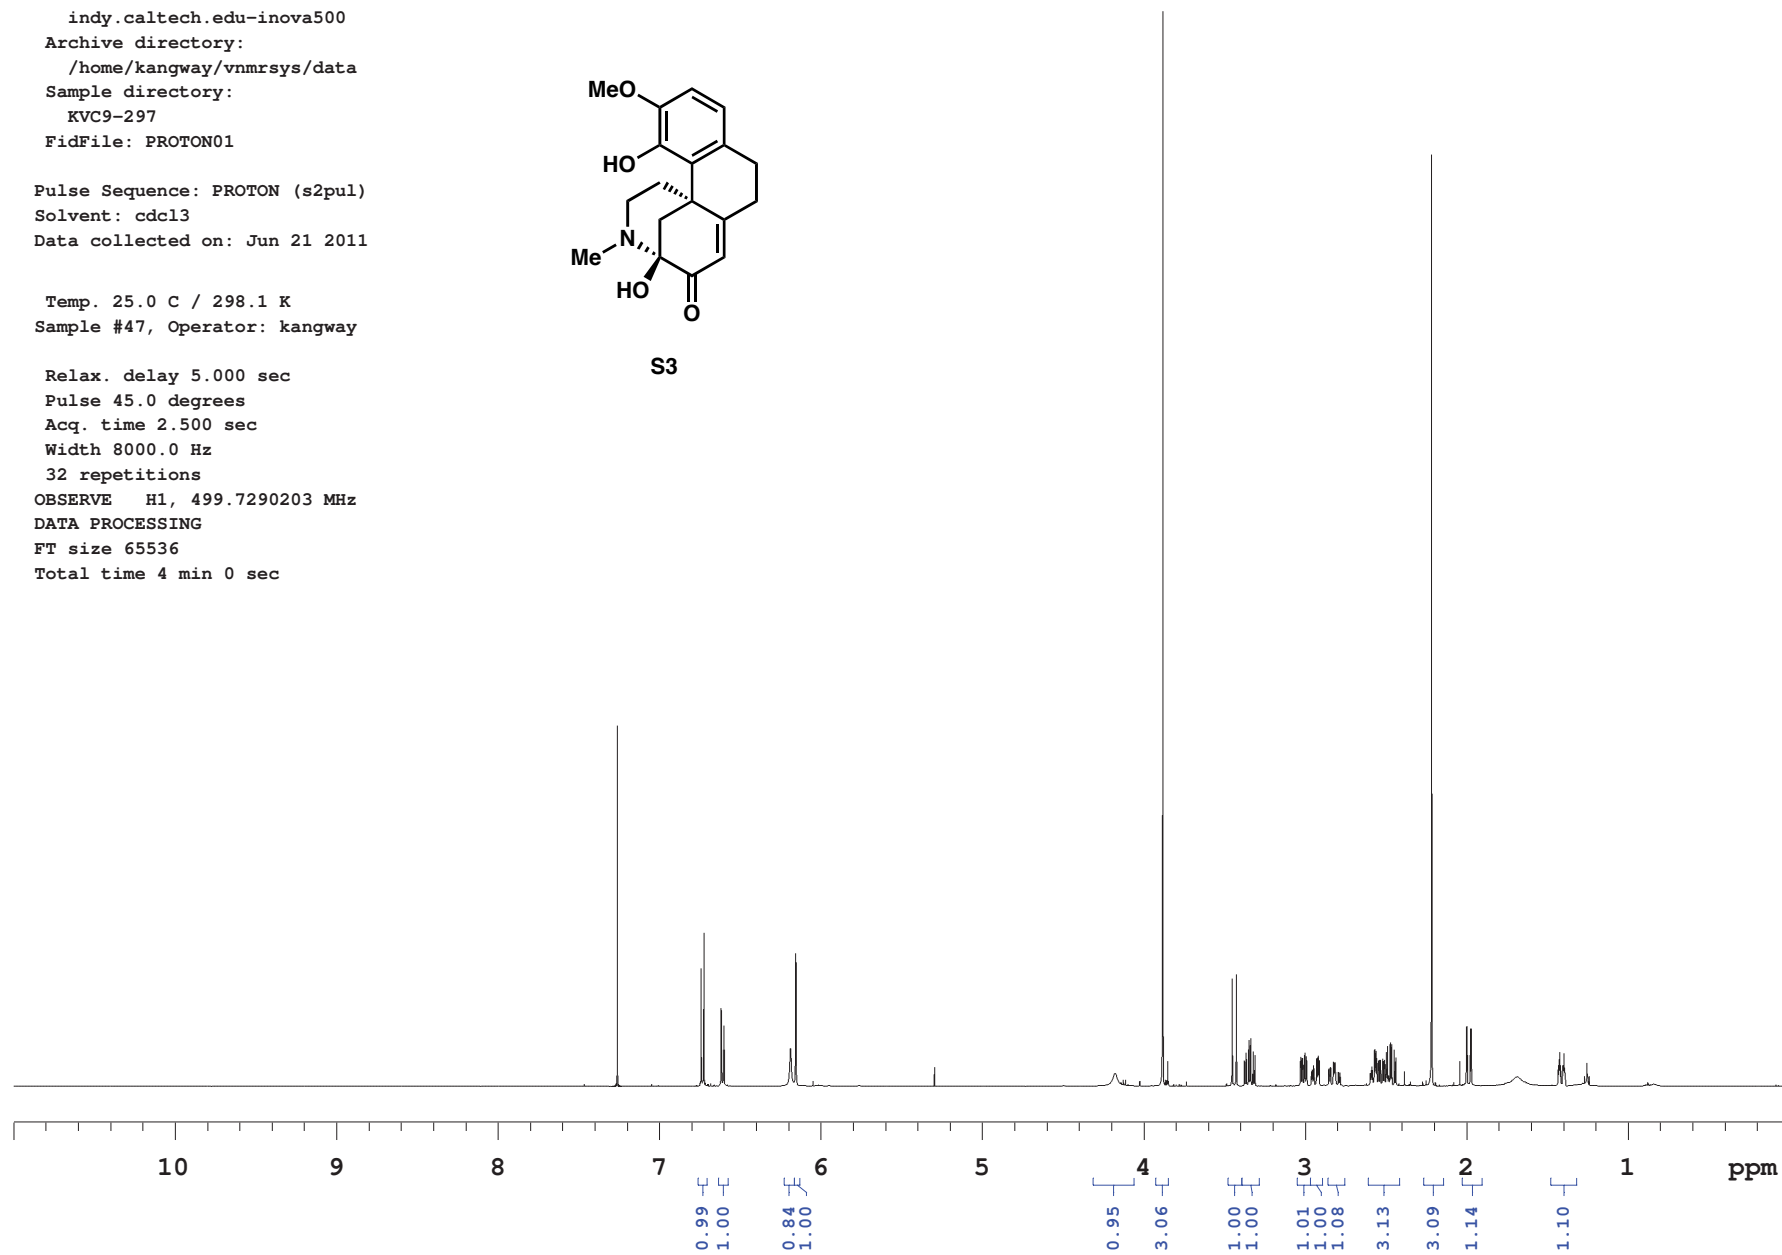

KVC9-297

Sample Name:

KVC9-297

Data Collected on:

indy.caltech.edu-inova500

Archive directory:

/home/kangway/vnmrsys/data

Sample directory:

KVC9-297

FidFile: CARBON01

Pulse Sequence: CARBON (s2pul)

Solvent: cdc13

Data collected on: Jun 21 2011

Temp. 25.0 C / 298.1 K

Sample #47, Operator: kangway

Relax. delay 1.000 sec

Pulse 45.0 degrees

Acq. time 1.042 sec

Width 31446.5 Hz

512 repetitions

OBSERVE C13, 125.6569633 MHz

DECOUPLE H1, 499.7315163 MHz

Power 39 dB

continuously on

WALTZ-16 modulated

DATA PROCESSING

Line broadening 0.5 Hz

FT size 65536

Total time 51 min

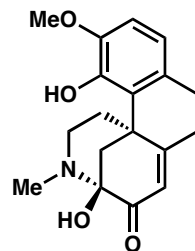

S3

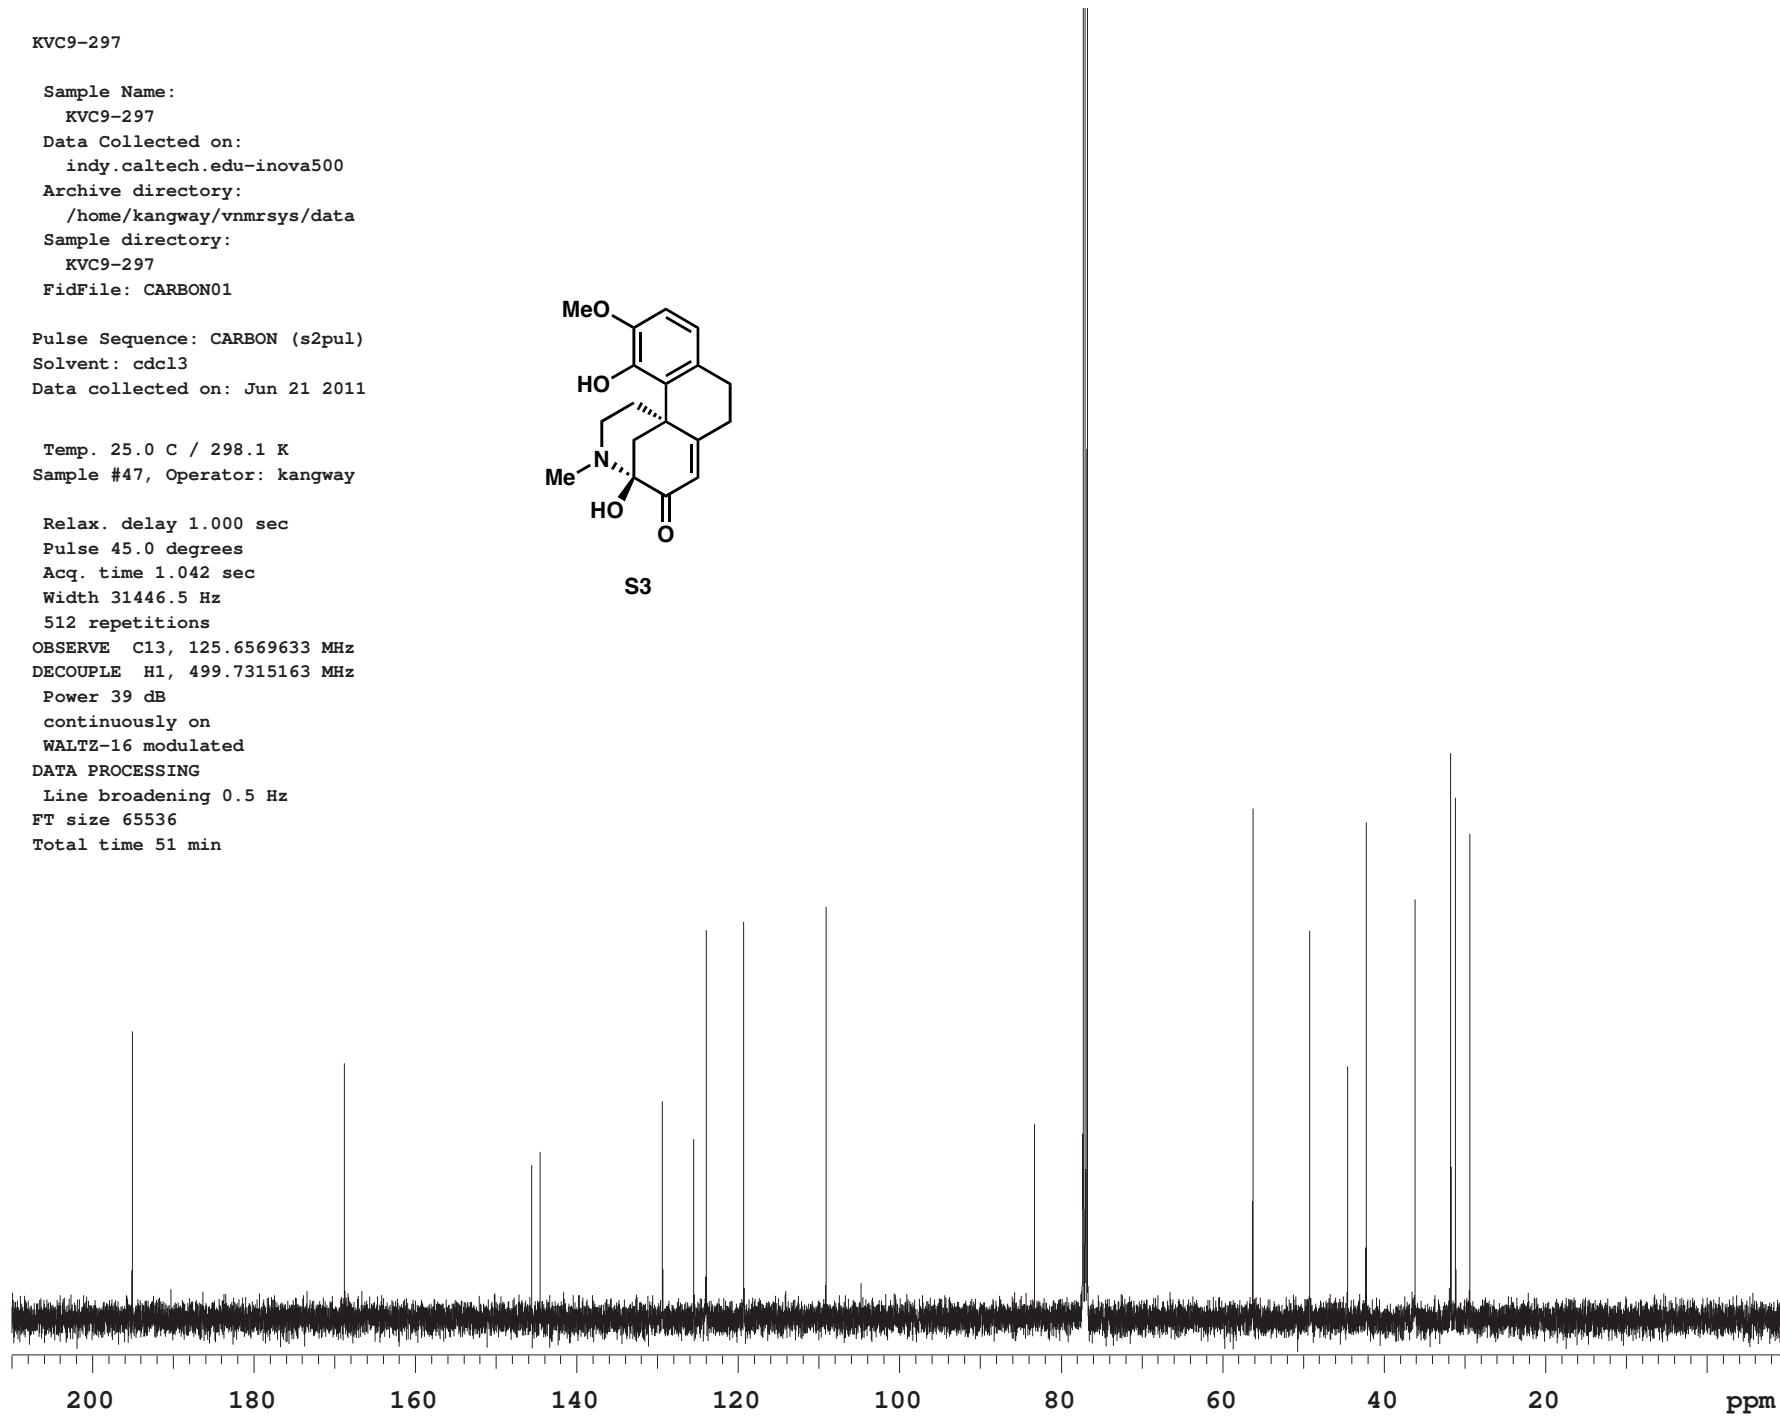

KVC9-301  
Cepharatine A

Sample Name:  
KVC9-301  
Data Collected on:  
indy.caltech.edu-inova500  
Archive directory:  
/home/kangway/vnmrsys/data  
Sample directory:  
KVC9-301  
FidFile: PROTON02

Pulse Sequence: PROTON (s2pul)  
Solvent: cdcl3  
Data collected on: Jun 22 2011

Temp. 25.0 C / 298.1 K  
Sample #46, Operator: kangway

Relax. delay 5.000 sec  
Pulse 45.0 degrees  
Acq. time 2.500 sec  
Width 8000.0 Hz  
32 repetitions  
OBSERVE H1, 499.7290203 MHz  
DATA PROCESSING  
Line broadening 0.2 Hz  
FT size 65536  
Total time 4 min 0 sec

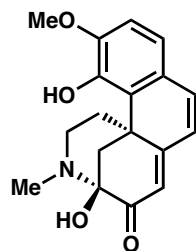

Cepharatine A (7)

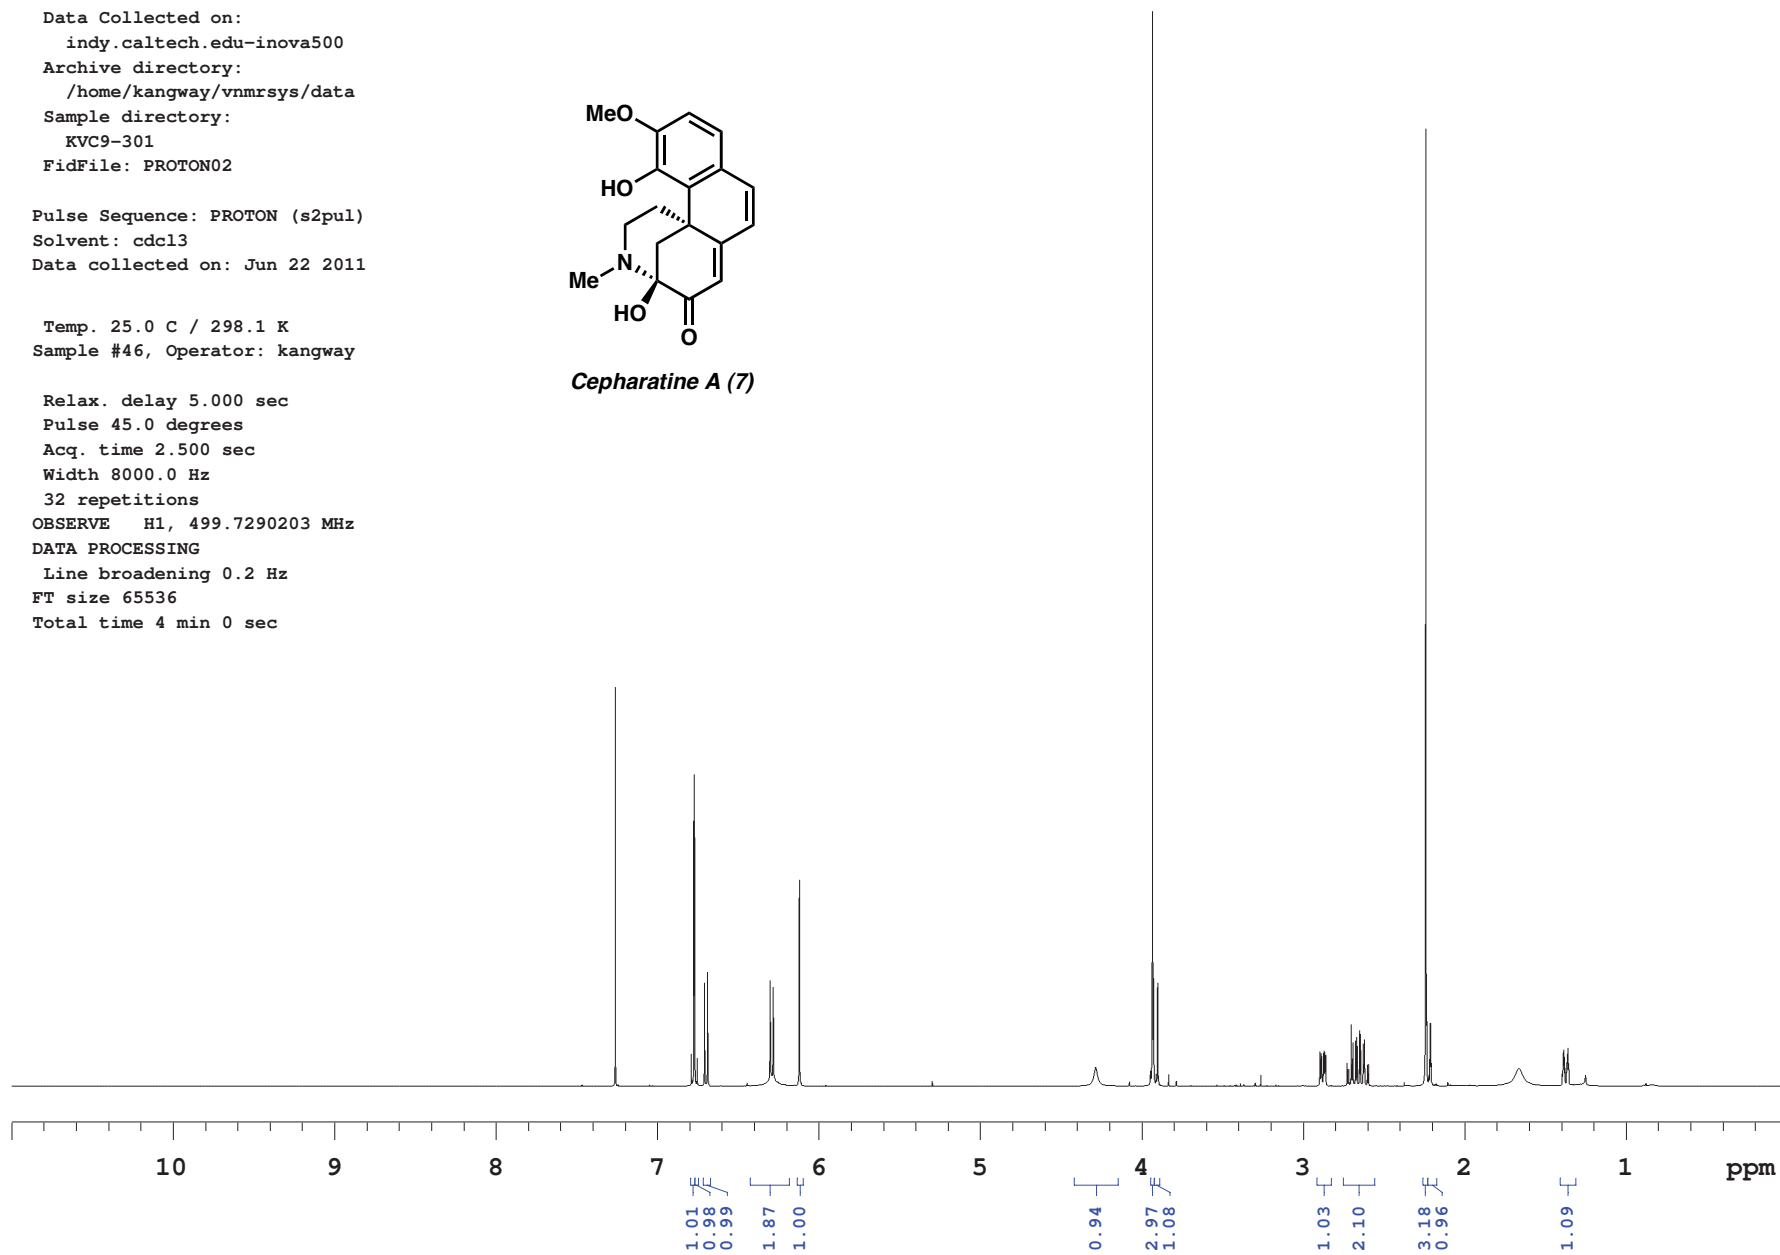

KVC9-301  
Cepharatine A

Sample Name:  
KVC9-301  
Data Collected on:  
indy.caltech.edu-inova500  
Archive directory:  
/home/kangway/vnmrsys/data  
Sample directory:  
KVC9-301  
FidFile: CARBON01

Pulse Sequence: CARBON (s2pul)  
Solvent: cdcl3  
Data collected on: Jun 22 2011

Temp. 25.0 C / 298.1 K  
Sample #46, Operator: kangway

Relax. delay 1.000 sec  
Pulse 45.0 degrees  
Acq. time 1.042 sec  
Width 31446.5 Hz  
1500 repetitions  
OBSERVE C13, 125.6569623 MHz  
DECOUPLE H1, 499.7315163 MHz  
Power 39 dB  
continuously on  
WALTZ-16 modulated  
DATA PROCESSING  
Line broadening 0.5 Hz  
FT size 65536  
Total time 51 min

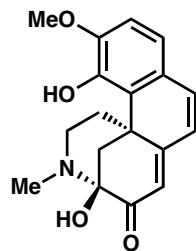

Cepharatine A (7)

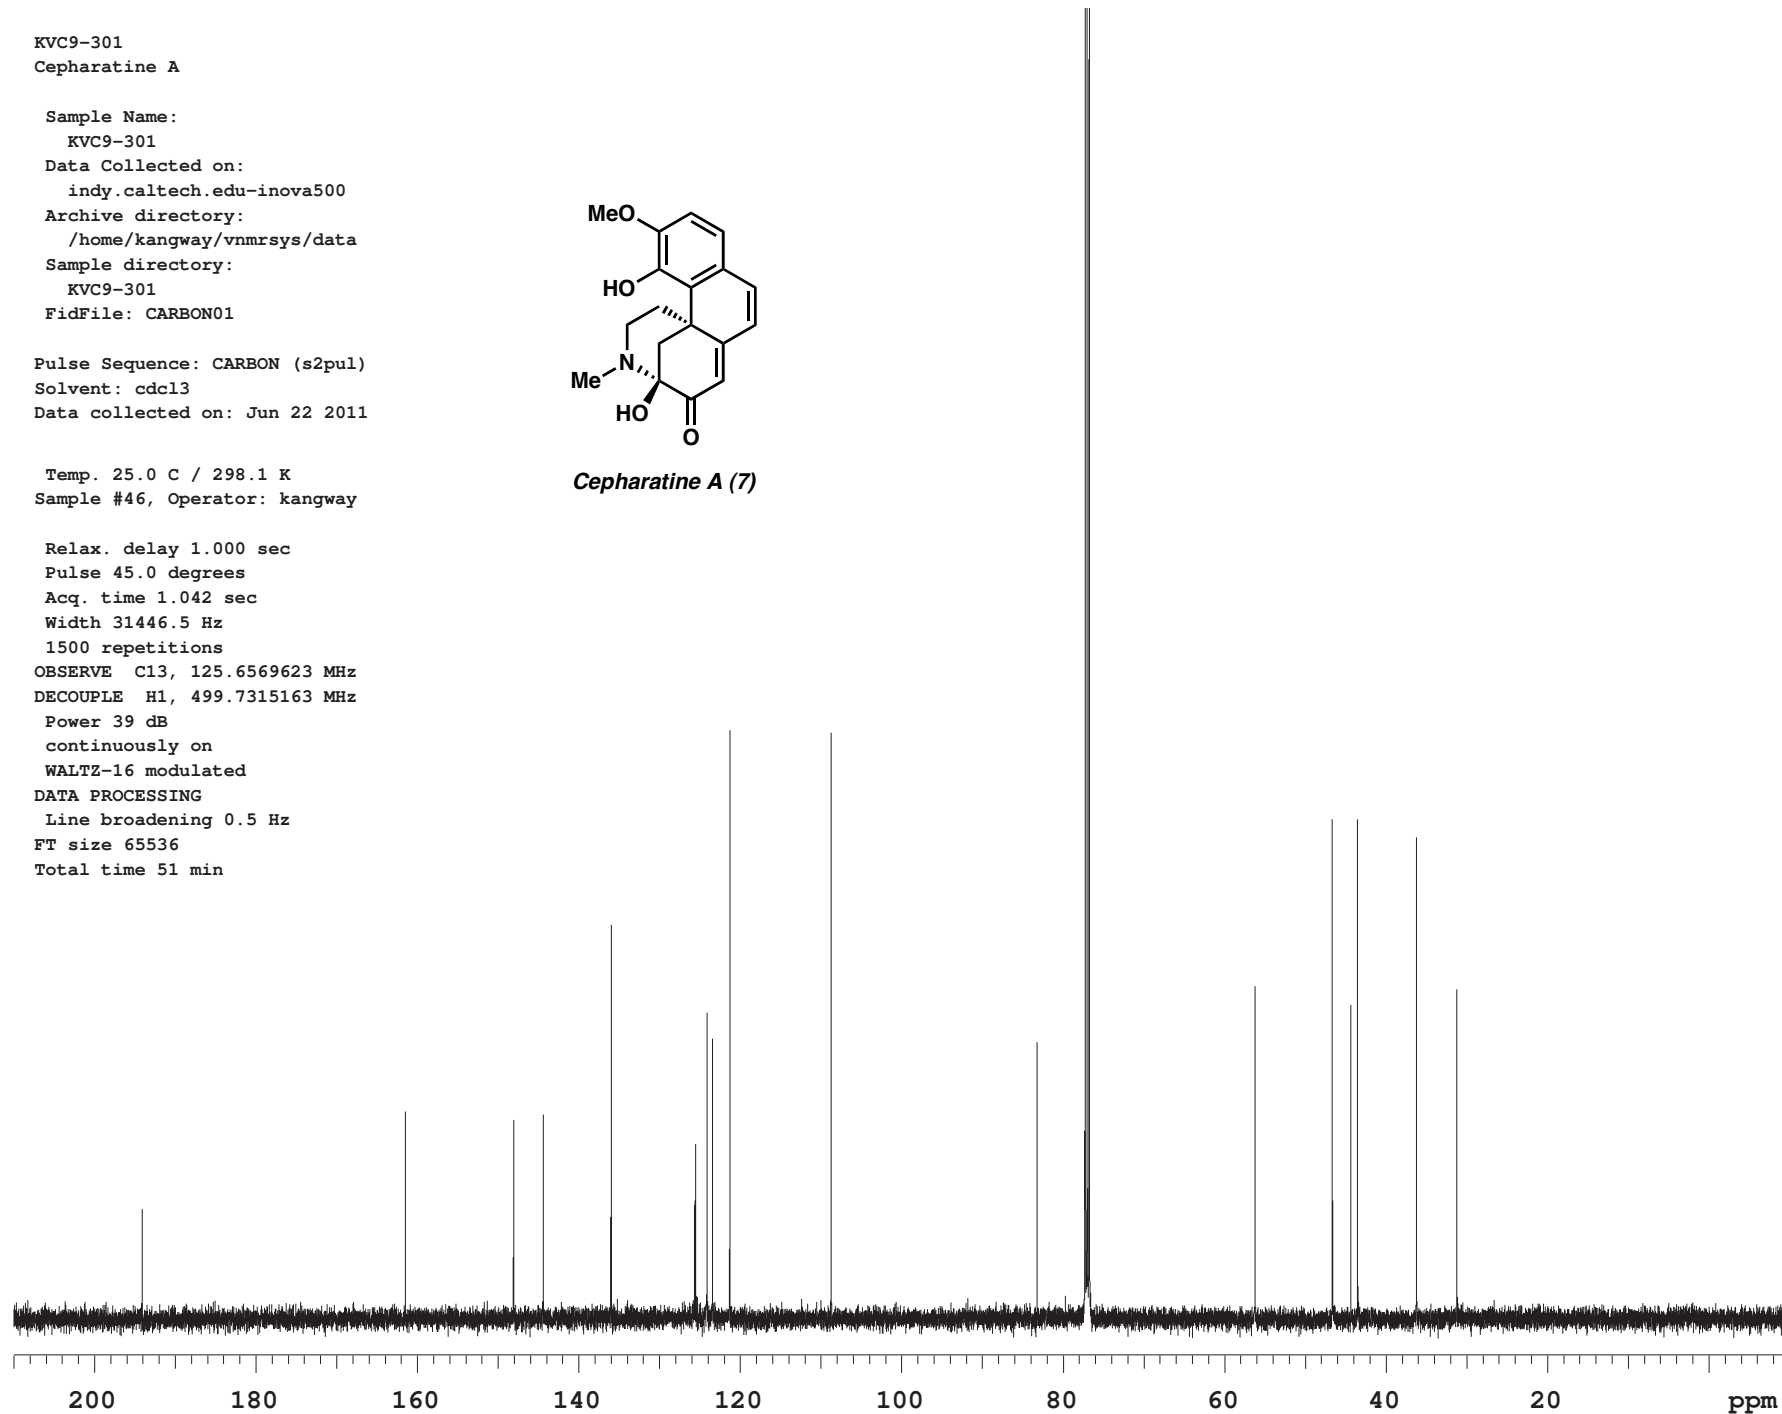

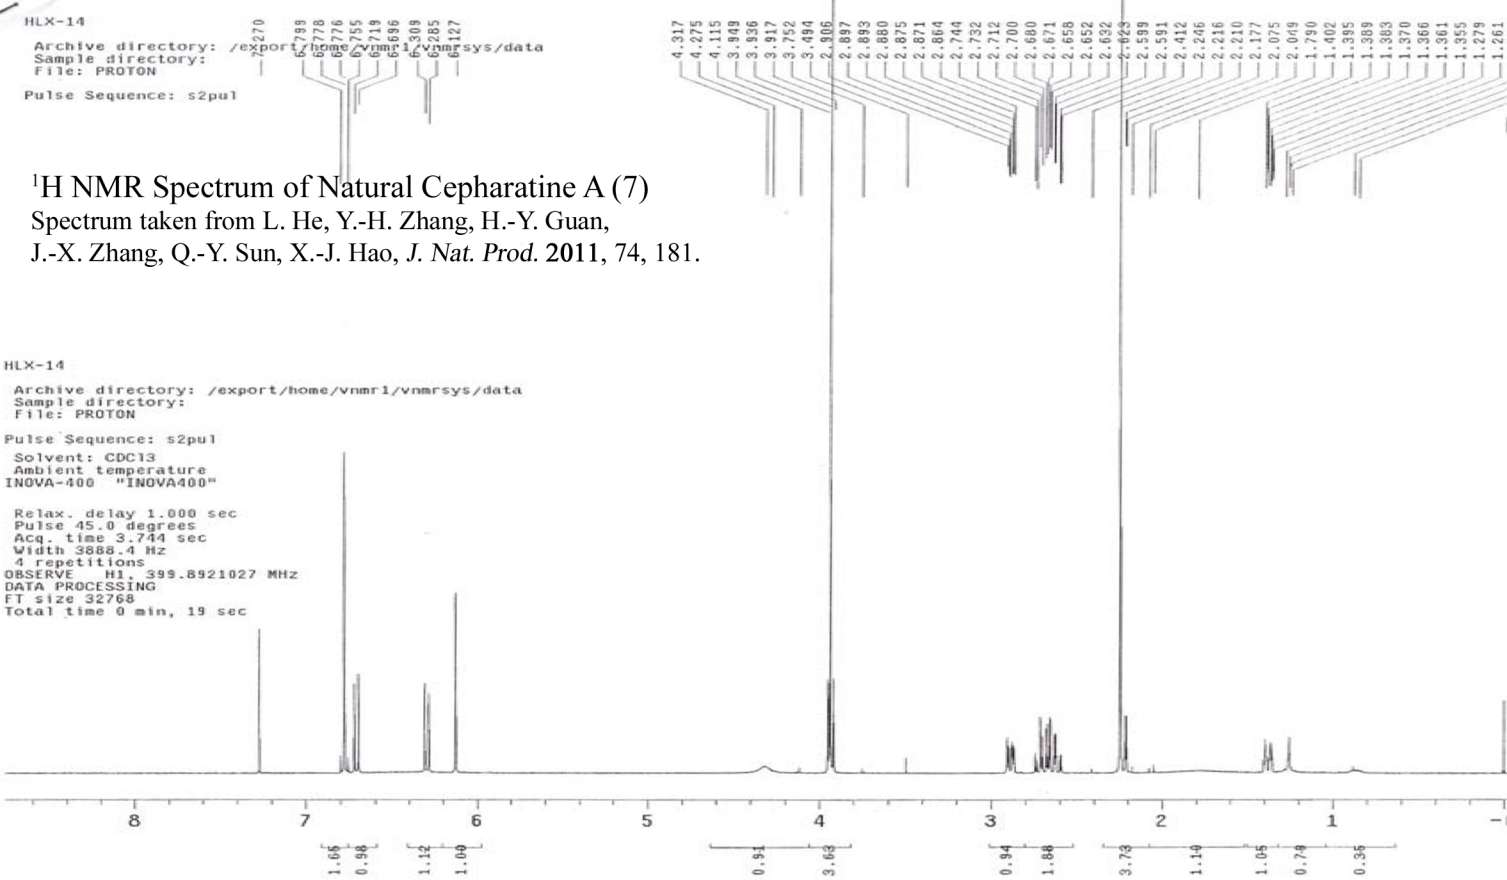

<sup>1</sup>H NMR Spectrum of Synthetic Cepharatine A (7)

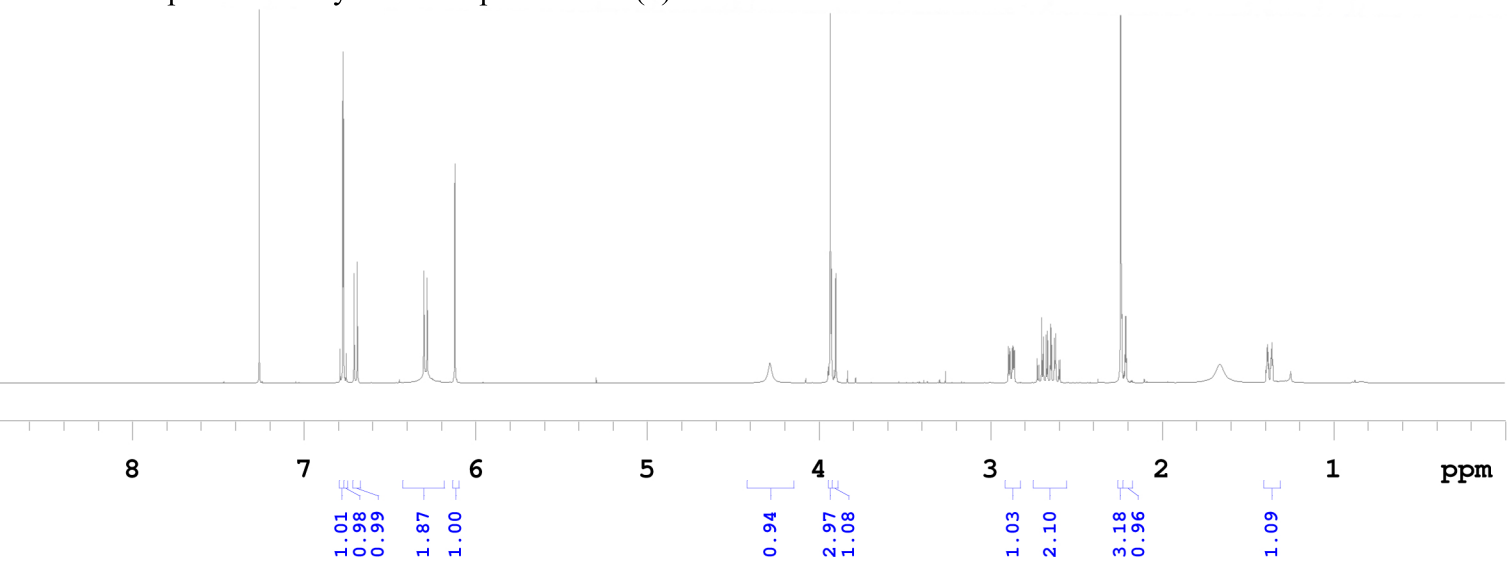

KVC9-303  
Cepharatine C, CDCl3

Sample Name:  
KVC9-303  
Data Collected on:  
indy.caltech.edu-inova500  
Archive directory:  
/home/kangway/vnmrsys/data  
Sample directory:  
KVC9-303  
FidFile: PROTON01

Pulse Sequence: PROTON (s2pul)  
Solvent: cdcl3  
Data collected on: Jun 22 2011

Sample #48, Operator: kangway

Relax. delay 5.000 sec  
Pulse 45.0 degrees  
Acq. time 2.500 sec  
Width 8000.0 Hz  
32 repetitions  
OBSERVE H1, 499.7290203 MHz  
DATA PROCESSING  
Line broadening 0.2 Hz  
FT size 65536  
Total time 4 min 0 sec

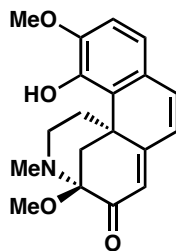

Cepharatine C (8)

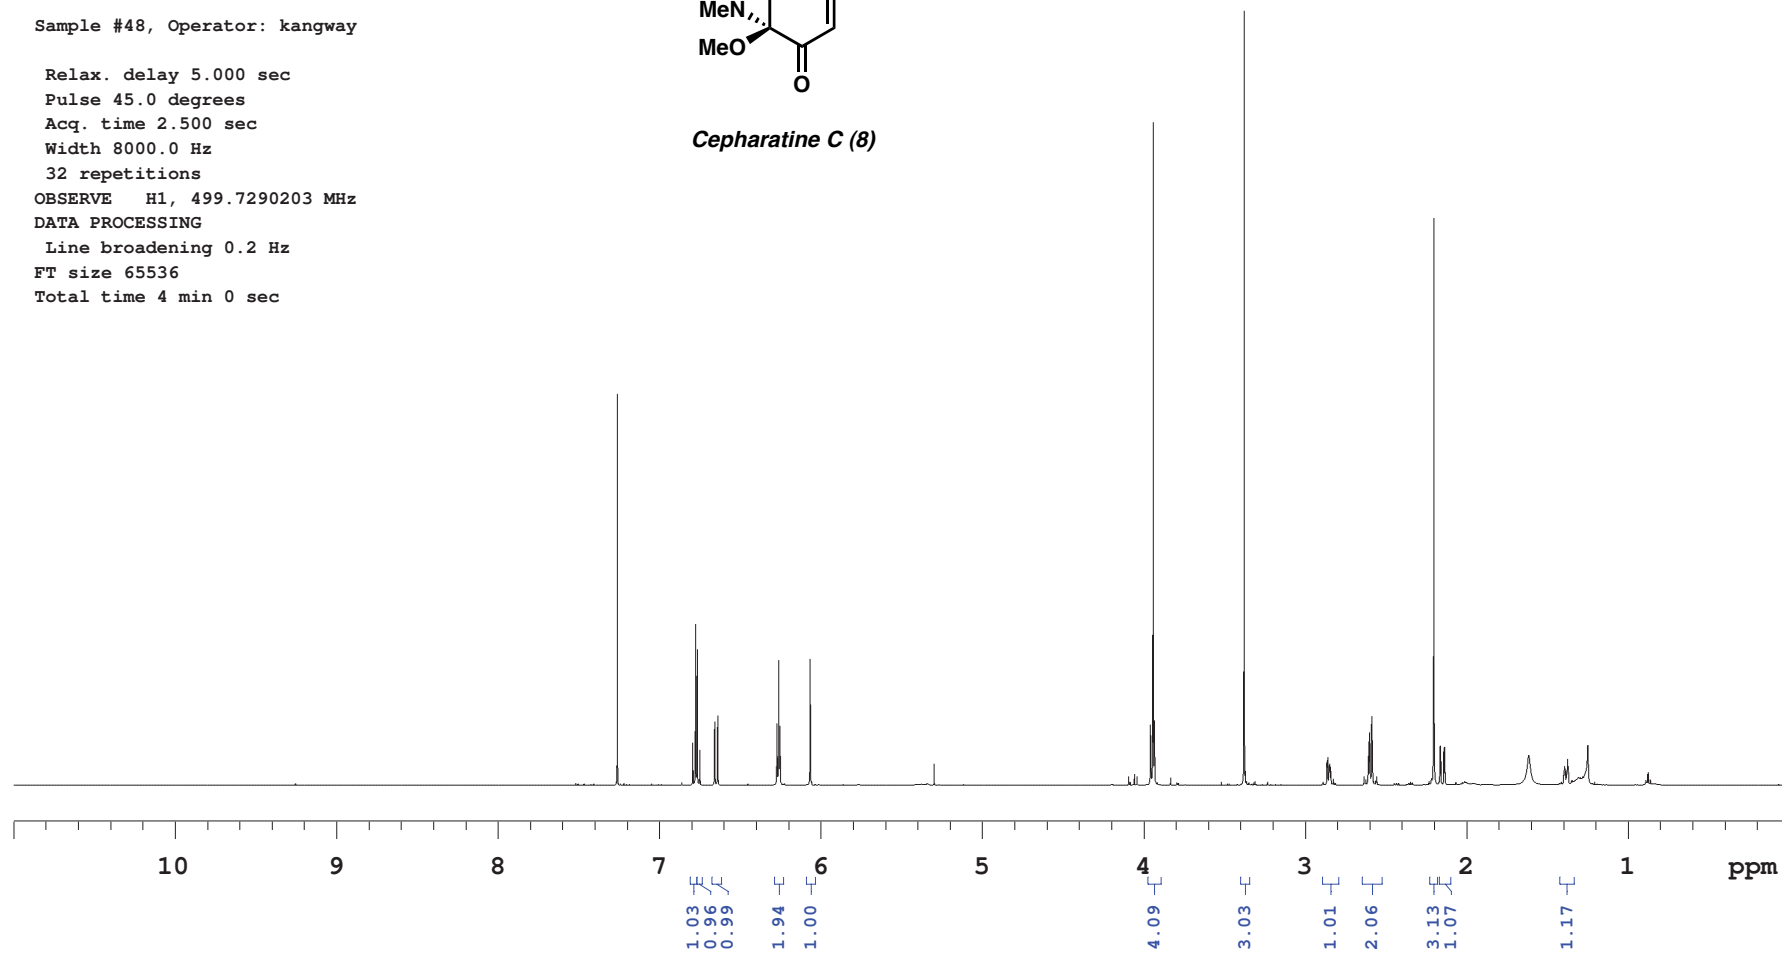

KVC9-303  
Cepharatine C, CDCl3

Sample Name:  
KVC9-303  
Data Collected on:  
indy.caltech.edu-inova500  
Archive directory:  
/home/kangway/vnmrsys/data  
Sample directory:  
KVC9-303  
FidFile: CARBON01

Pulse Sequence: CARBON (s2pul)  
Solvent: cdcl3  
Data collected on: Jun 22 2011

Sample #48, Operator: kangway

Relax. delay 1.000 sec  
Pulse 45.0 degrees  
Acq. time 1.042 sec  
Width 31446.5 Hz  
2000 repetitions  
OBSERVE C13, 125.6569633 MHz  
DECOUPLE H1, 499.7315163 MHz  
Power 39 dB  
continuously on  
WALTZ-16 modulated  
DATA PROCESSING  
Line broadening 0.5 Hz  
FT size 65536  
Total time 1 hr, 8 min

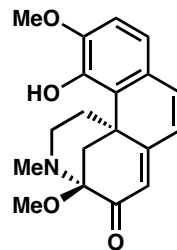

Cepharatine C (8)

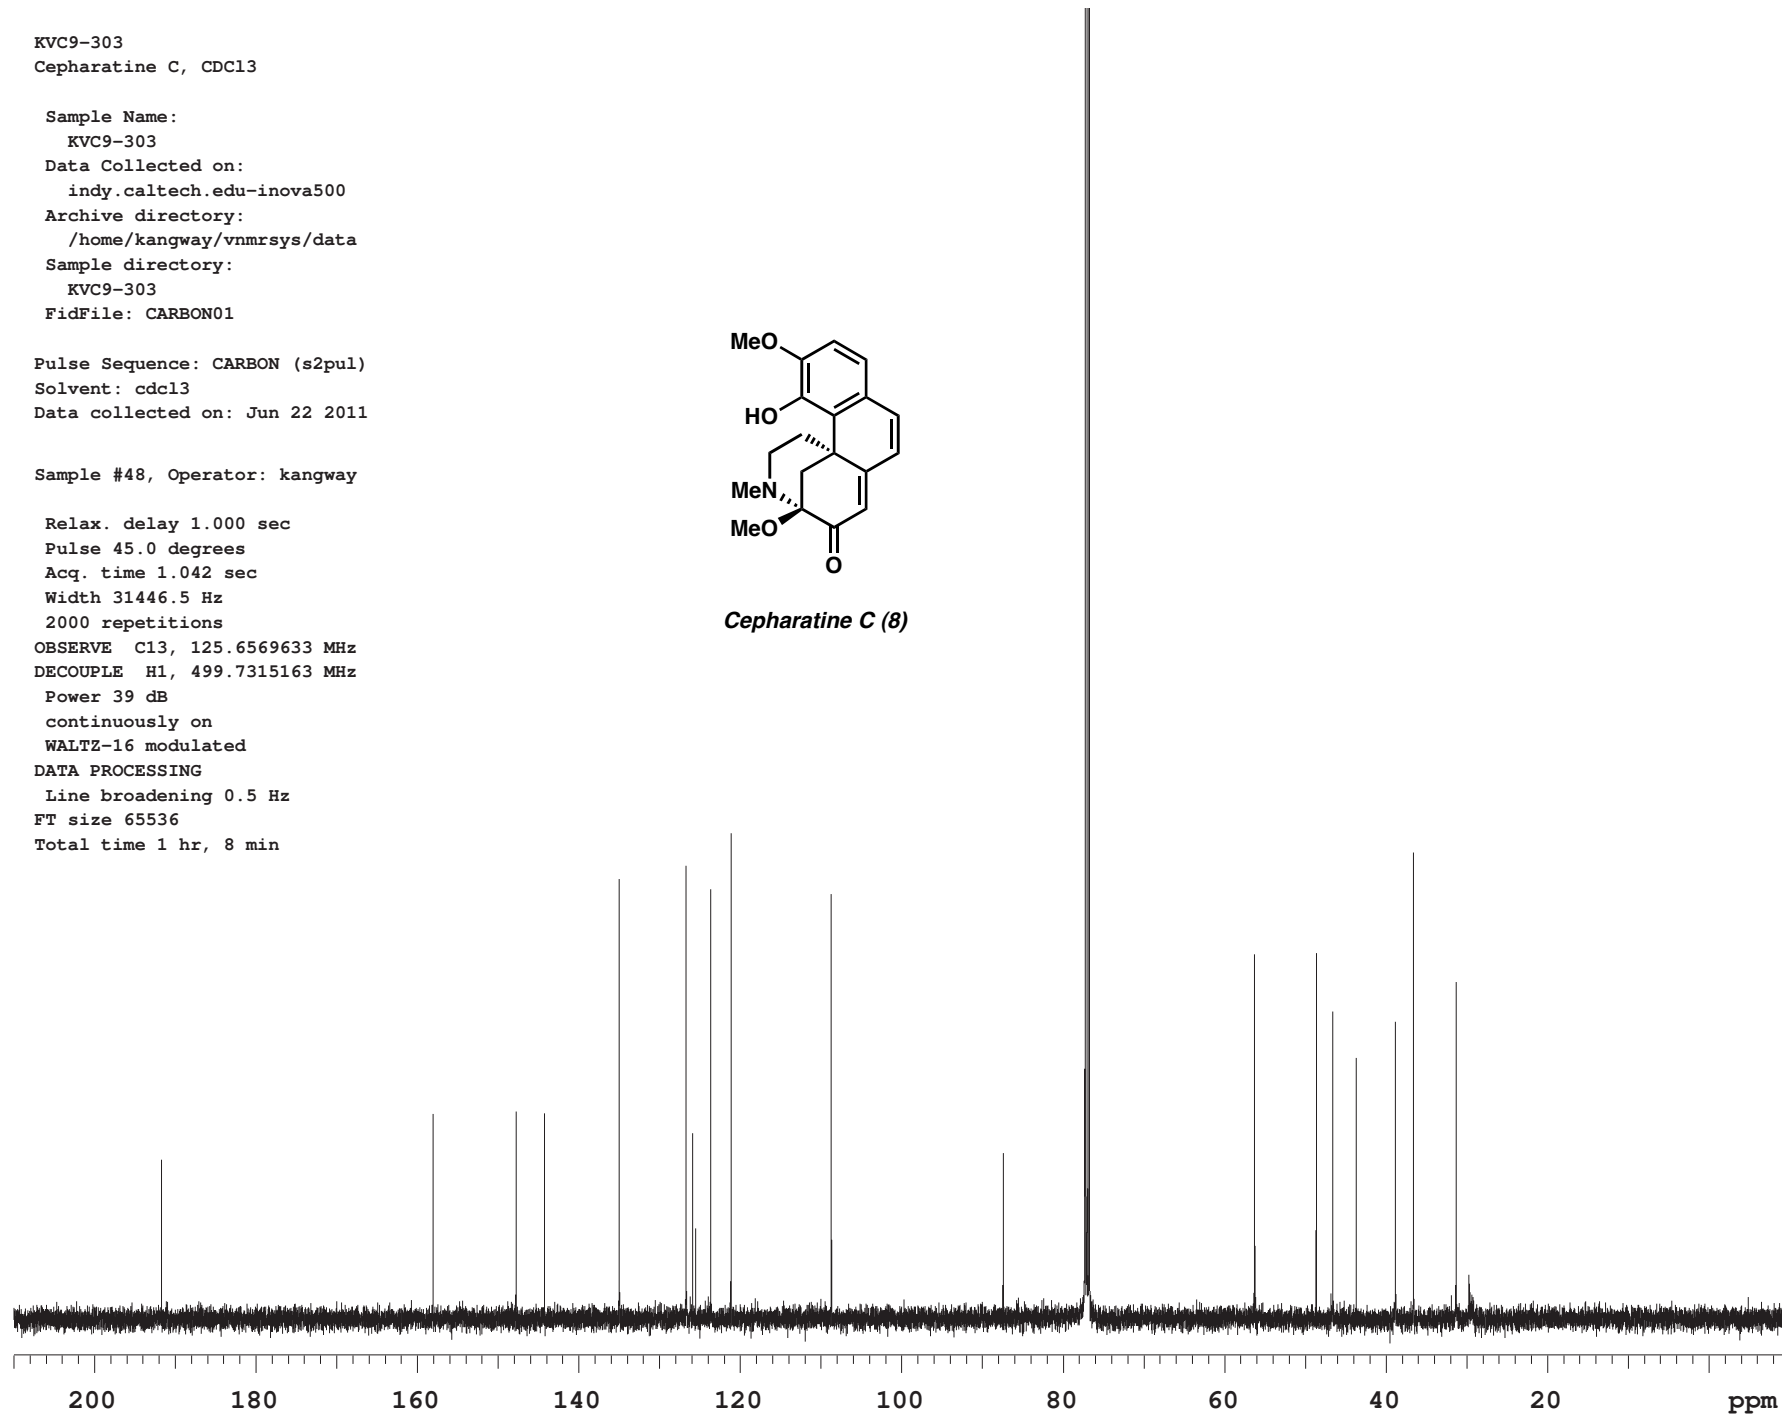



KVC9-303

Sample Name:

KVC9-303

Data Collected on:

hg2.caltech.edu-mercury300

Archive directory:

/home/kangway/vnmrsys/data

Sample directory:

KVC9-303\_20110625\_03

FidFile: data\_s2pul\_001

Pulse Sequence: PROTON (s2pul)

Solvent: cd3od

Data collected on: Jun 25 2011

Temp. 25.0 C / 298.1 K

Operator: kangway

Relax. delay 1.000 sec

Pulse 45.0 degrees

Acq. time 1.708 sec

Width 4796.2 Hz

64 repetitions

OBSERVE H1, 299.8177476 MHz

DATA PROCESSING

FT size 16384

Total time 6 min 29 sec

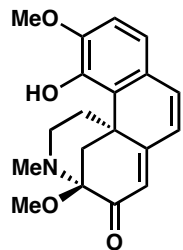

Cepharatine C (8)

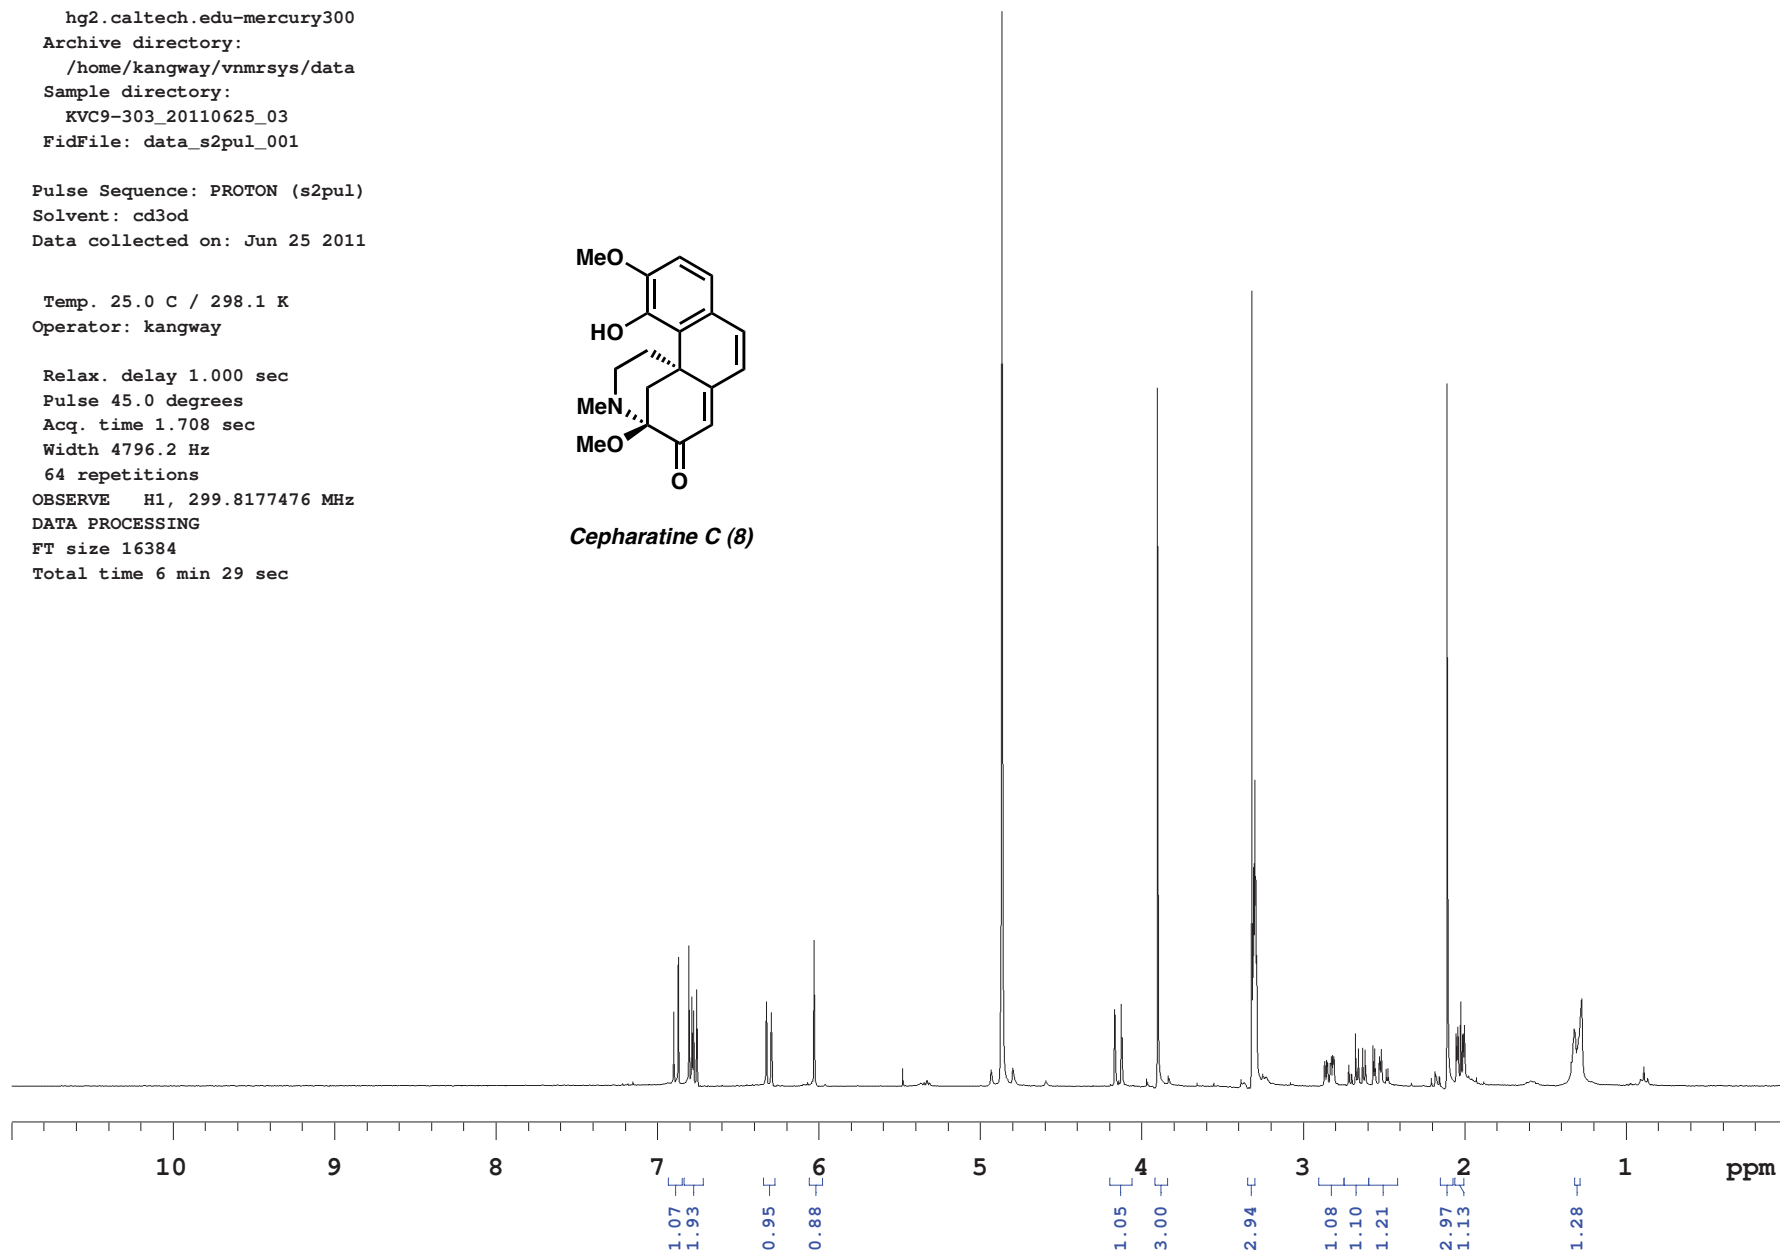

KVC9-303  
Cepharatine C, methanol-d4

Sample Name:  
KVC9-303  
Data Collected on:  
indy.caltech.edu-inova500  
Archive directory:  
/home/kangway/vnmrsys/data  
Sample directory:  
KVC9-303  
FidFile: CARBON02

Pulse Sequence: CARBON (s2pul)  
Solvent: cd3od  
Data collected on: Jun 25 2011

Sample #20, Operator: kangway

Relax. delay 1.000 sec  
Pulse 45.0 degrees  
Acq. time 1.042 sec  
Width 31446.5 Hz  
1500 repetitions  
OBSERVE C13, 125.6572792 MHz  
DECOUPLE H1, 499.7334852 MHz  
Power 39 dB  
continuously on  
WALTZ-16 modulated  
DATA PROCESSING  
Line broadening 0.5 Hz  
FT size 65536  
Total time 51 min

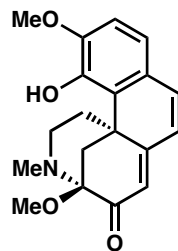

*Cepharatine C (8)*

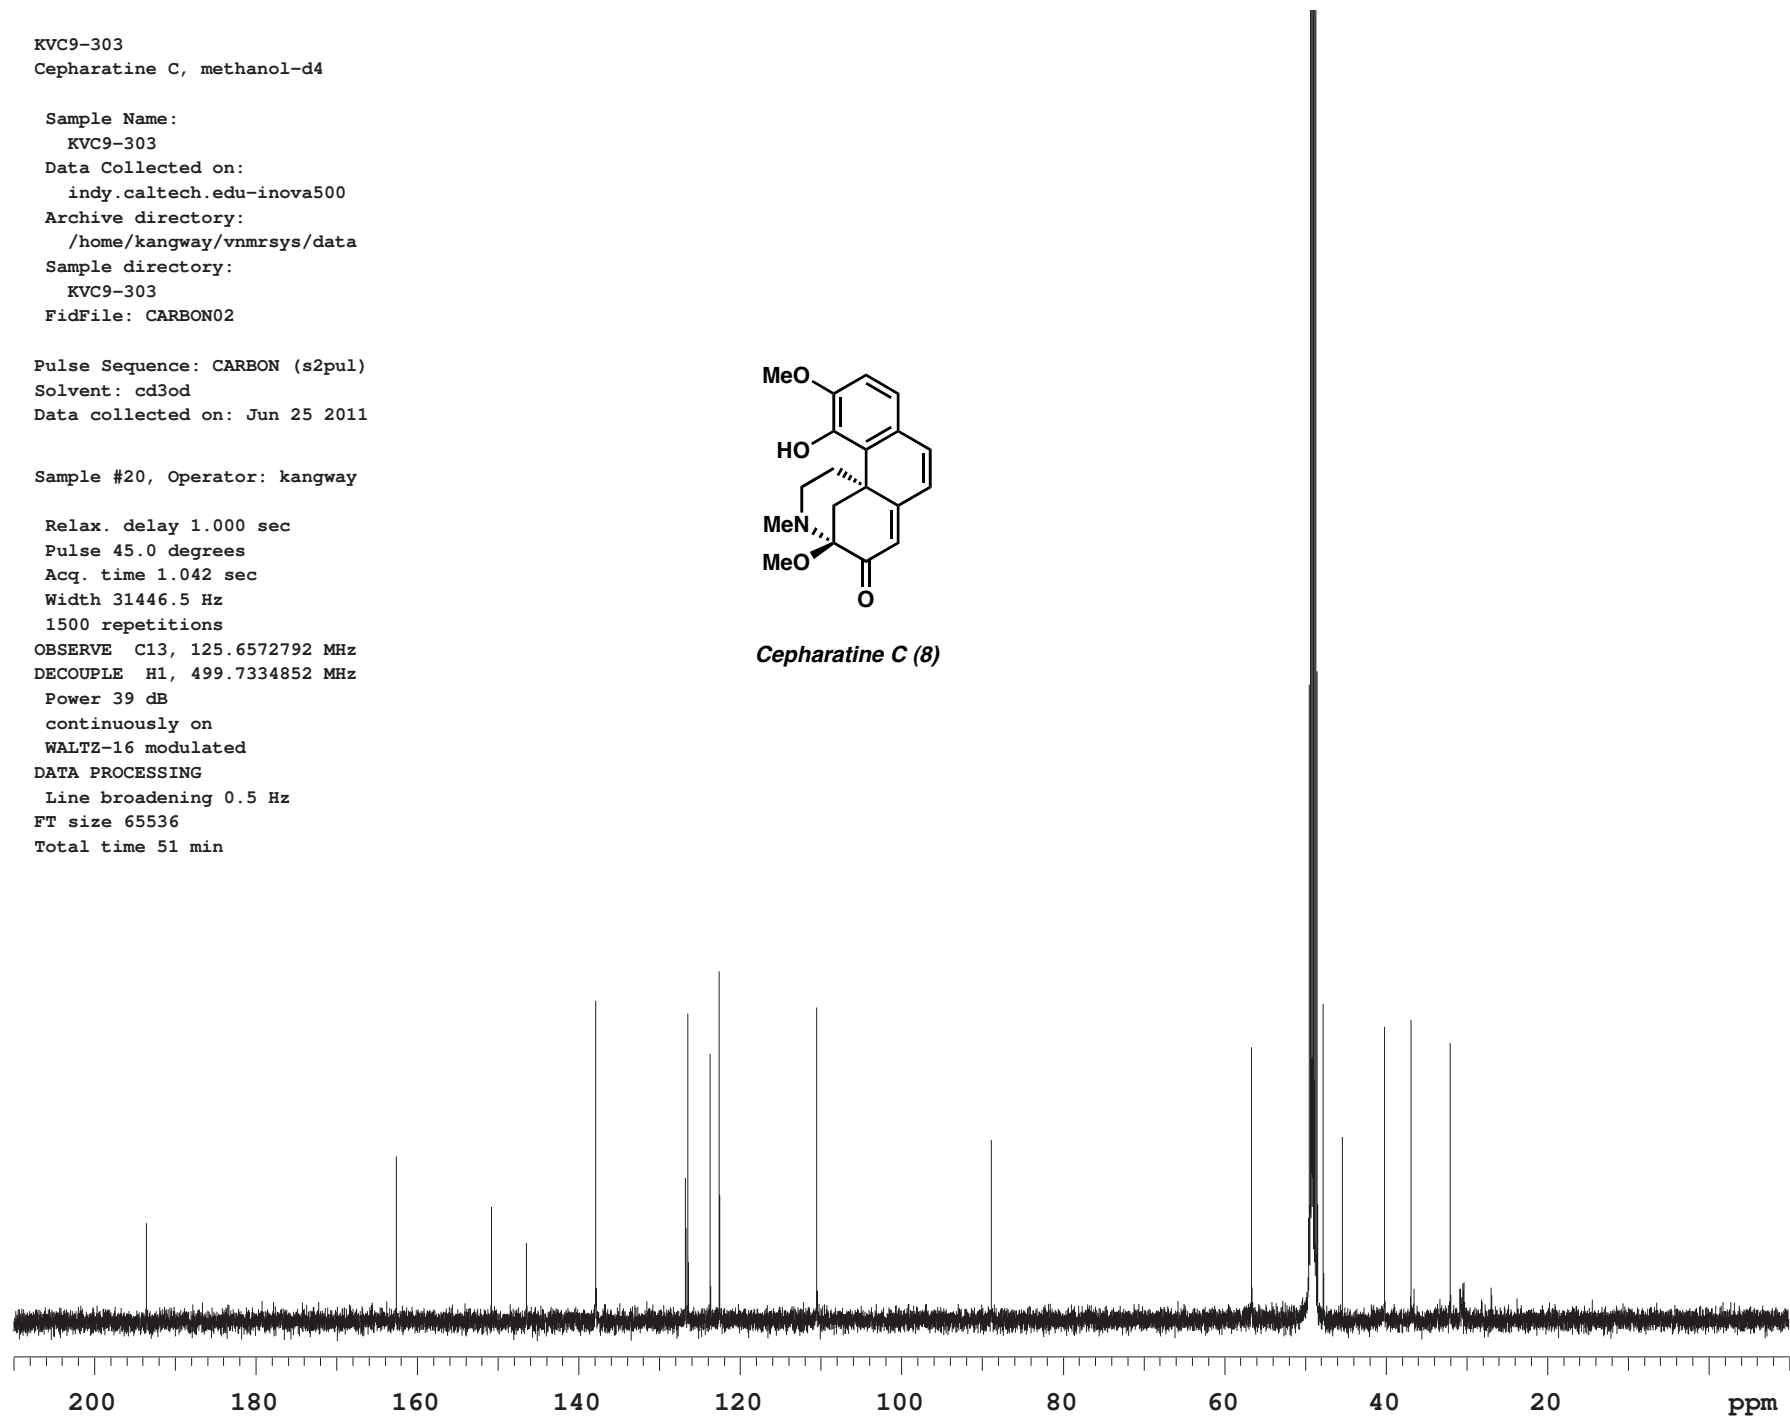

HLX-26  
Archive directory: /export/home/vnmr  
Sample directory:  
File: PROTON  
Pulse Sequence: s2pu]

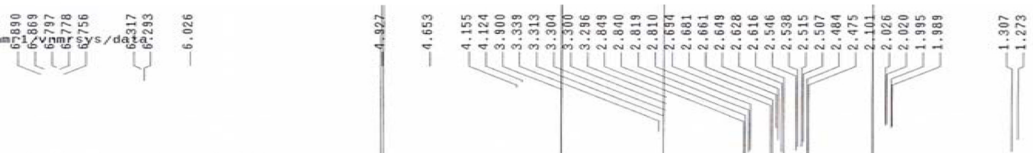

<sup>1</sup>H NMR Spectrum of Natural Cephadrine C (8)  
Spectrum taken from L. He, Y.-H. Zhang, H.-Y. Guan, J.-X. Zhang,  
Q.-Y. Sun, X.-J. Hao, *J. Nat. Prod.* 2011, 74, 181.

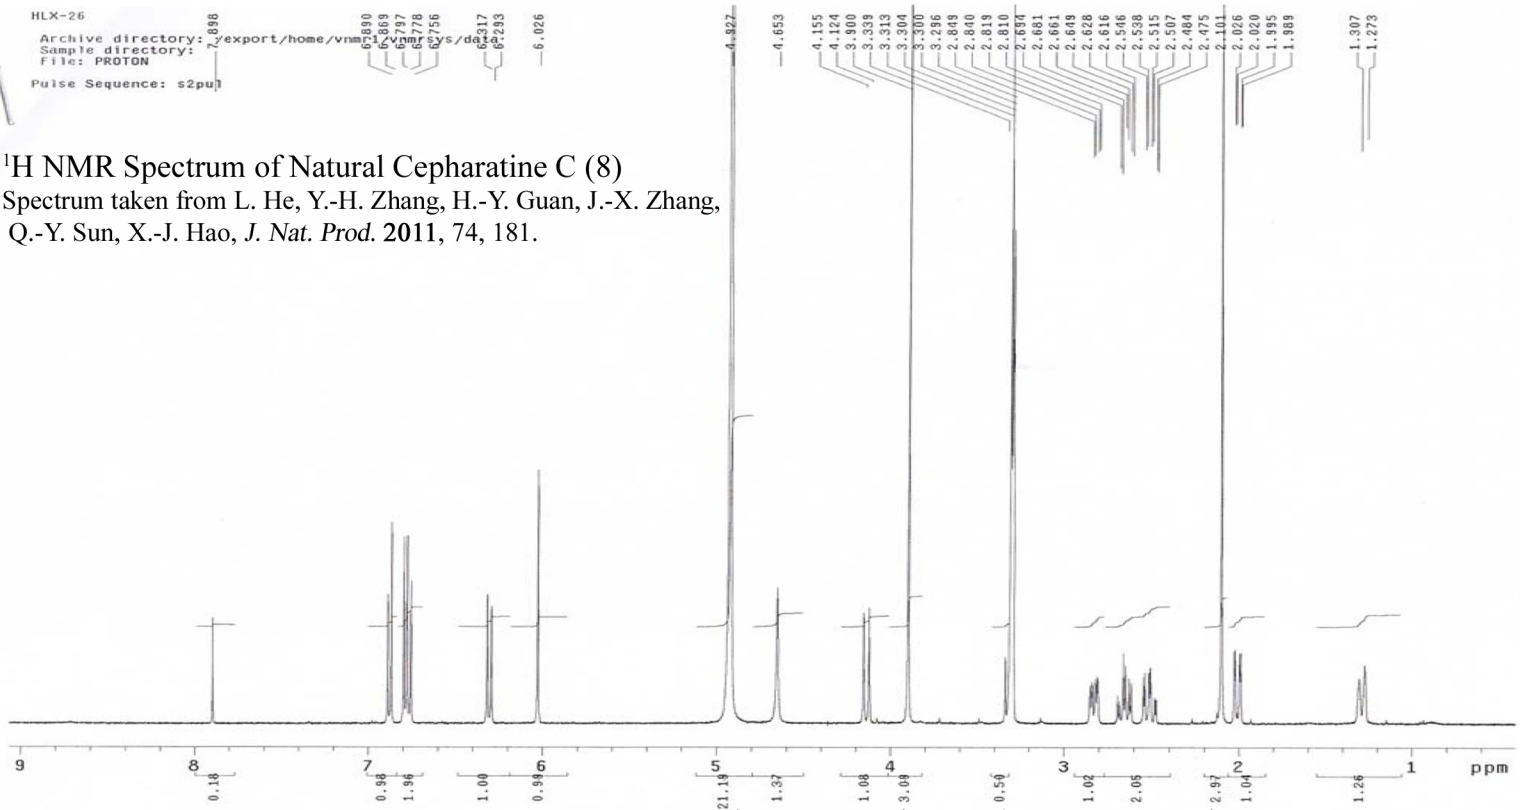

<sup>1</sup>H NMR Spectrum of Synthetic Cephadrine C (8)

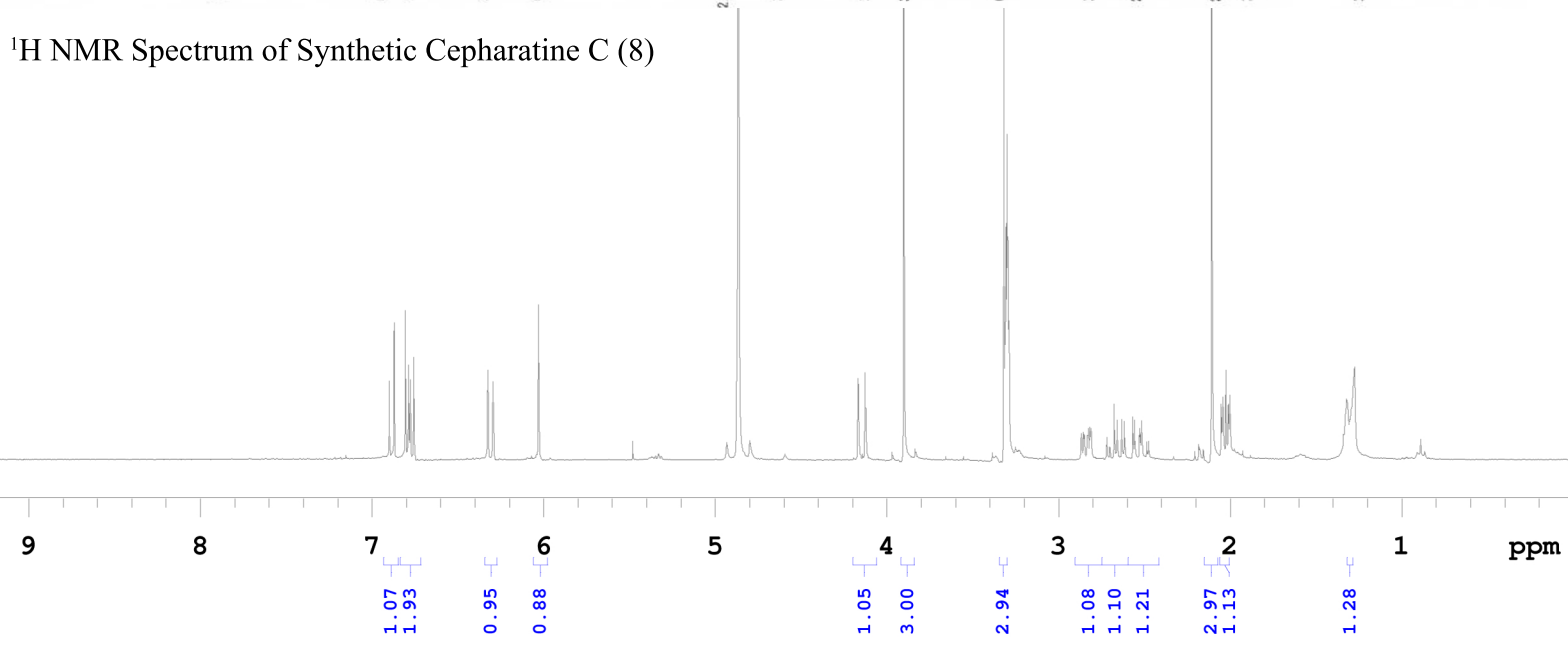

Supplement: NIHMS416668-supplement-Supporting_Information.pdf [file NIHMS416668-supplement-Supporting_Information.pdf]
